# Supplementary material
Source: publisher site journal article supplement (https://www.degruyterbrill.com/publication/isbn/9783110221343/downloadAsset/9783110221343_Titel_07.pdf)
Supplement: Supplementary file 1 [file 9783110221343_Titel_07.pdf]

|                       | $\Sigma$ | Meiß. | Laus. | Osterl. | Vogt.-Erz. | Thür. | Nord. |
|-----------------------|----------|-------|-------|---------|------------|-------|-------|
| SÄCHSISCH             | 158      | 17    | 31    | 23      | 25         | 28    | 34    |
| BAYERISCH/FRÄNKISCH   | 104      | 11    | 15    | 14      | 27         | 19    | 18    |
| THÜRINGISCH           | 100      | 12    | 14    | 17      | 14         | 25    | 18    |
| MAKROREGIONEN         |          |       |       |         |            |       |       |
| VOGTLÄNDISCH          | 68       | 13    | 11    | 8       | 18         | 11    | 7     |
| ANHALTISCH            | 56       | 8     | 9     | 15      | 5          | 9     | 10    |
| ERZGEBIRGISCH         | 52       | 9     | 7     | 11      | 18         | 3     | 4     |
| BERLINISCH            | 50       | 9     | 8     | 7       | 5          | 6     | 15    |
| DRESDNERISCH          | 36       | 7     | 3     | 8       | 9          | 5     | 4     |
| LEIPZIGERISCH         | 29       | 7     | 3     | 4       | 7          | 4     | 4     |
| LAUSITZISCH           | 28       | 8     | 9     | 2       | 8          | 1     | 0     |
| OBERLAUSITZISCH       | 22       | 4     | 10    | 3       | 3          | 2     | 0     |
| HALLENSISCH           | 14       | 1     | 0     | 2       | 0          | 3     | 8     |
| SORBISCH              | 14       | 3     | 0     | 2       | 2          | 2     | 5     |
| CHEMNITZERISCH        | 12       | 2     | 0     | 4       | 4          | 1     | 1     |
| MESOREGIONEN          |          |       |       |         |            |       |       |
| HARZ                  | 8        | 0     | 3     | 1       | 0          | 2     | 2     |
| NIEDERSCHLESISCH      | 5        | 1     | 4     | 0       | 0          | 0     | 0     |
| OBERLAND              | 5        | 1     | 4     | 0       | 0          | 0     | 0     |
| SÜDTHÜRINGISCH        | 5        | 1     | 0     | 0       | 0          | 3     | 1     |
| GERA                  | 4        | 0     | 0     | 0       | 0          | 4     | 0     |
| MAGDEBURG             | 4        | 0     | 0     | 0       | 0          | 2     | 2     |
| SPREEDIALEKT          | 4        | 0     | 0     | 1       | 0          | 3     | 0     |
| ÜBERGANG/MISCHUNG     | 4        | 0     | 2     | 0       | 0          | 1     | 1     |
| NIEDERLAUSITZ         | 3        | 0     | 0     | 1       | 1          | 1     | 0     |
| OSTERZGEBIRGISCH      | 3        | 2     | 0     | 0       | 1          | 0     | 0     |
| OSTTHÜRINGISCH        | 3        | 0     | 0     | 1       | 1          | 1     | 0     |
| RHÖN                  | 3        | 0     | 1     | 0       | 0          | 2     | 0     |
| THÜRINGISCH-SÄCHSISCH | 3        | 0     | 0     | 0       | 0          | 3     | 0     |
| WESTERZGEBIRGISCH     | 3        | 2     | 0     | 0       | 1          | 0     | 0     |
| ZWICKISCH             | 3        | 0     | 0     | 0       | 3          | 0     | 0     |
| BAUTZNER              | 2        | 1     | 0     | 1       | 0          | 0     | 0     |
| HESSISCH              | 2        | 0     | 0     | 0       | 1          | 0     | 1     |
| JENA                  | 2        | 0     | 0     | 0       | 0          | 2     | 0     |
| MITTELSÄCHSISCH       | 2        | 0     | 0     | 0       | 1          | 1     | 0     |
| NIEDERDEUTSCH/PLATT   | 2        | 1     | 1     | 0       | 0          | 0     | 0     |
| NIEDERSORBISCH        | 2        | 0     | 1     | 1       | 0          | 0     | 0     |
| NORDTHÜRINGISCH       | 2        | 0     | 0     | 0       | 0          | 2     | 0     |
| OBERHESSISCH          | 2        | 0     | 0     | 0       | 0          | 2     | 0     |
| OBERSORBISCH          | 2        | 0     | 1     | 1       | 0          | 0     | 0     |
| OSTSÄCHSISCH          | 2        | 0     | 0     | 0       | 0          | 2     | 0     |
| PLAUSCH               | 2        | 0     | 0     | 0       | 2          | 0     | 0     |
| SÄCHSISCH-BERLINISCH  | 2        | 1     | 0     | 0       | 1          | 0     | 0     |
| SÜDBRANDENBURGISCH    | 2        | 1     | 0     | 0       | 0          | 0     | 1     |
| THÜRINGER WALD        | 2        | 0     | 0     | 1       | 0          | 1     | 0     |
| UNTERHESSISCH         | 2        | 0     | 0     | 0       | 0          | 2     | 0     |
| BITTERFELD            | 1        | 0     | 0     | 0       | 0          | 0     | 1     |
| DÖBELN                | 1        | 1     | 0     | 0       | 0          | 0     | 0     |
| EDELROLLER            | 1        | 0     | 1     | 0       | 0          | 0     | 0     |
| EICHSFELD             | 1        | 0     | 1     | 0       | 0          | 0     | 0     |
| EISENACH              | 1        | 0     | 0     | 0       | 1          | 0     | 0     |

|                                |   |   |   |   |   |   |   |
|--------------------------------|---|---|---|---|---|---|---|
| ELBAUE                         | 1 | 1 | 0 | 0 | 0 | 0 | 0 |
| ERFURT                         | 1 | 0 | 0 | 0 | 0 | 1 | 0 |
| EGERLAND-BÖHMISCH              | 1 | 0 | 0 | 0 | 1 | 0 | 0 |
| ERLBACH                        | 1 | 0 | 0 | 0 | 1 | 0 | 0 |
| ERZGEBIRGISCH-<br>OSTSÄCHSISCH | 1 | 0 | 0 | 0 | 1 | 0 | 0 |
| ERZGEBIRGSVORLAND              | 1 | 0 | 0 | 0 | 1 | 0 | 0 |
| FRANKENWALD                    | 1 | 0 | 0 | 0 | 1 | 0 | 0 |
| FRÄNKISCH-<br>THÜRINGISCH      | 1 | 0 | 0 | 0 | 0 | 1 | 0 |
| FREIBERG                       | 1 | 1 | 0 | 0 | 0 | 0 | 0 |
| HALBERSTADT                    | 1 | 0 | 0 | 0 | 0 | 0 | 1 |
| HANNOVERANISCH                 | 1 | 0 | 1 | 0 | 0 | 0 | 0 |
| HOCHDEUTSCH-<br>BERLINISCH     | 1 | 0 | 1 | 0 | 0 | 0 | 0 |
| HOCHDEUTSCH-<br>LAUSITZISCH    | 1 | 0 | 1 | 0 | 0 | 0 | 0 |
| KERNVOGTLÄNDISCH               | 1 | 0 | 0 | 0 | 1 | 0 | 0 |
| KLINGENTHAL                    | 1 | 0 | 0 | 0 | 1 | 0 | 0 |
| KYFFHÄUSERDIALEKT              | 1 | 0 | 0 | 1 | 0 | 0 | 0 |
| LOMMATZSCHER<br>PFLEGE         | 1 | 1 | 0 | 0 | 0 | 0 | 0 |
| MANSFELD                       | 1 | 0 | 0 | 0 | 0 | 0 | 1 |
| MITTELERZGEBIRGISCH            | 1 | 0 | 0 | 0 | 1 | 0 | 0 |
| MITTELTHÜRINGISCH              | 1 | 0 | 0 | 0 | 0 | 1 | 0 |
| NIEDERSÄCHSISCH                | 1 | 0 | 0 | 0 | 0 | 1 | 0 |
| NORDHÄUSER                     | 1 | 0 | 0 | 0 | 0 | 1 | 0 |
| NORDOSTERLÄNDISCH              | 1 | 0 | 0 | 0 | 0 | 0 | 1 |
| NORDSÄCHSISCH                  | 1 | 0 | 0 | 0 | 0 | 0 | 1 |
| NORDWESTSÄCHSISCH              | 1 | 0 | 0 | 1 | 0 | 0 | 0 |
| OSTDEUTSCH                     | 1 | 0 | 0 | 0 | 1 | 0 | 0 |
| PREUBISCH                      | 1 | 0 | 1 | 0 | 0 | 0 | 0 |
| RIESA                          | 1 | 1 | 0 | 0 | 0 | 0 | 0 |
| SÄNGER                         | 1 | 0 | 0 | 1 | 0 | 0 | 0 |
| SCHLESISCH                     | 1 | 0 | 0 | 0 | 0 | 1 | 0 |
| SELB                           | 1 | 0 | 0 | 0 | 1 | 0 | 0 |
| SÜDSÄCHSISCH                   | 1 | 0 | 0 | 0 | 1 | 0 | 0 |
| SÜDWESTSÄCHSISCH               | 1 | 0 | 0 | 1 | 0 | 0 | 0 |
| THÜR-SÄCHS-<br>ANHALTISCH      | 1 | 0 | 0 | 0 | 0 | 1 | 0 |
| VOGTLÄNDISCH-<br>ERZGEB        | 1 | 0 | 0 | 0 | 1 | 0 | 0 |
| WESTDEUTSCH                    | 1 | 0 | 0 | 0 | 1 | 0 | 0 |
| WESTSÄCHSISCH                  | 1 | 0 | 0 | 0 | 1 | 0 | 0 |
| WITTENBERG                     | 1 | 0 | 0 | 0 | 0 | 0 | 1 |
| ZITTAU                         | 1 | 1 | 0 | 0 | 0 | 0 | 0 |
| MIKROREGIONEN                  |   |   |   |   |   |   |   |

Tabelle 1: Reichweiten der eingezeichneten Sprachraumkonzepte als Makro-, Meso- und Mikroregionen

| eingezeichnet und benannt (Anzahl)                  | Häufigkeit in % <sup>1</sup> | Frequenzstufe |
|-----------------------------------------------------|------------------------------|---------------|
| Meißnische Gruppe (gültige Grundgesamtheit: 20)     |                              |               |
| 1 - 5                                               | unter 30 %                   | 1             |
| 6 - 10                                              | 30 - 50 %                    | 2             |
| 11 - 14                                             | 51 - 70 %                    | 3             |
| über 14                                             | mehr als 70 %                | 4             |
| Lausitzische Gruppe (gültige Grundgesamtheit: 25)   |                              |               |
| 1 - 7                                               | unter 32 %                   | 1             |
| 8 - 13                                              | 32 - 52 %                    | 2             |
| 14 - 18                                             | 53 - 72 %                    | 3             |
| über 18                                             | mehr als 72 %                | 4             |
| Osterländische Gruppe (gültige Grundgesamtheit: 24) |                              |               |
| 1 - 7                                               | unter 33 %                   | 1             |
| 8 - 12                                              | 33 - 50 %                    | 2             |
| 13 - 17                                             | 51 - 71 %                    | 3             |
| über 17                                             | mehr als 71 %                | 4             |
| Vogtl.-Ergeb. Gruppe (gültige Grundgesamtheit: 25)  |                              |               |
| 1 - 7                                               | unter 32 %                   | 1             |
| 8 - 13                                              | 32 - 52 %                    | 2             |
| 14 - 18                                             | 53 - 72 %                    | 3             |
| über 18                                             | mehr als 72 %                | 4             |
| Thüringische Gruppe (gültige Grundgesamtheit: 27)   |                              |               |
| 1 - 8                                               | unter 33 %                   | 1             |
| 9 - 14                                              | 33 - 52 %                    | 2             |
| 15 - 19                                             | 53 - 70 %                    | 3             |
| über 19                                             | mehr als 70 %                | 4             |
| Nordgruppe (gültige Grundgesamtheit: 26)            |                              |               |
| 1 - 7                                               | unter 31 %                   | 1             |
| 8 - 13                                              | 31 - 50 %                    | 2             |
| 14 - 18                                             | 51 - 67 %                    | 3             |
| über 18                                             | mehr als 67 %                | 4             |

Tabelle 2: Übersicht der Frequenzstufen

<sup>1</sup> Die Prozentwerte wurden z.T. gerundet.

| Bezeichnungen                                                                            | digitalisiert |
|------------------------------------------------------------------------------------------|---------------|
| Sächsisch/ typisches Sächsisch/ gepflegtes Sächsisch/ langgezogenes Sächsisch            | 17            |
| FREQUENZSTUFE 4                                                                          |               |
| Vogtländisch/ Vogtland/ Vogtländisches Sächsisch                                         | 13            |
| Thüringisch/ Thüringer Dialekt                                                           | 12            |
| Franken/ Fränkisch/ Oberfränkisch/ Bayerisch-Fränkisch/ Bayerisch/ Bayerisch             | 11            |
| FREQUENZSTUFE 3                                                                          |               |
| Berliner Dialekt/ Berlinerisch/ Berlinisch/ Berliner/ Brandenburgisch                    | 9             |
| Erzgebirge/ Erzgebirgisch/ erzgebirgisches Sächsisch                                     | 9             |
| Lausitzer/ Lausitz/ Lausitz Rollen/ Lausitzer Dialekt/ Lausitzerisch                     | 8             |
| Anhaltinisch/ Sächsisch-Anhaltinisch/ Sachsen-Anhalt Dialekt/ Anhalt-Brandenburger Platt | 8             |
| Leipziger Sächsisch/ Leipzigerisch/ Leipziger Dialekt/ Leipzsch                          | 7             |
| Dresdner Dialekt/ Dresdnerisch/ Dresdner Sächsisch                                       | 7             |
| FREQUENZSTUFE 2                                                                          |               |
| O-Lausitz/ Oberlausitz/ Oberlausitzer Dialekt                                            | 4             |
| Sorbisch/ Sorbisch-Wendisch                                                              | 3             |
| Chemnitzer Dialekt/ Chemnitzer Sächsisch                                                 | 2             |
| Osterzgebirge/ Osterzgebirgisch                                                          | 2             |
| Westerzgebirgisch                                                                        | 2             |
| Bautzner                                                                                 | 1             |
| Döbeln                                                                                   | 1             |
| Elbaue                                                                                   | 1             |
| Freiberg                                                                                 | 1             |
| Hallensisch                                                                              | 1             |
| Niederschlesisch                                                                         | 1             |
| Oberland                                                                                 | 1             |
| Riesaer                                                                                  | 1             |
| Südbrandenburgisch                                                                       | 1             |
| Südthüringisch                                                                           | 1             |
| Zittauer                                                                                 | 1             |
| Lommatzcher Pflege                                                                       | 1             |
| Niederdeutsch [P]latt                                                                    | 1             |
| Mischmasch zwischen Sächsisch und Berlinisch                                             | 1             |
| Hessisch                                                                                 | 0             |
| Altmärkisch                                                                              | 0             |
| Hannoveranisch                                                                           | 0             |
| Harz                                                                                     | 0             |
| Magdebursch                                                                              | 0             |
| Niedersächsisch                                                                          | 0             |
| Westdeutsch                                                                              | 0             |
| Sächsische Schweiz                                                                       | 0             |
| Meißen (N. O. W. S)                                                                      | 0             |
| FREQUENZSTUFE 1                                                                          |               |

Tabelle 3: Frequenzstufen der digitalisierten Dialekträume der meißnischen Befragten



| Bezeichnungen                                                                | digitalisiert |
|------------------------------------------------------------------------------|---------------|
| Sächsisch/ Sachsen/ typisch Sächsisch                                        | 31            |
| FREQUENZSTUFE 4                                                              |               |
| Bayrisch/ Fränkisch/ Oberbayern/ Bayern                                      | 15            |
| Thüringen/ thüringisch/ Thüringer Dialekt/ thür. Sächsisch                   | 14            |
| FREQUENZSTUFE 3                                                              |               |
| Vogtländisch/ vogtl. Sächsisch/ Plauener/ Vogtland                           | 11            |
| Oberlausitz/ oberlausitzer Roller                                            | 10            |
| Niederlausitz/ niederlausitzer Mundart/ lausitzer Sprache/ Lausitz           | 9             |
| Anhaltinisch/ Sachsen-Anhaltinisch/ Hallisches Sächsisch/ Sachsen-Anhalt     | 9             |
| Brandenburg/ Berlinerisch/ Berlinisch/ Berlinern/ Berliner Dialekt/ Berliner | 8             |
| FREQUENZSTUFE 2                                                              |               |
| Erzgebirgisch                                                                | 7             |
| Schlesisch/ schlesische Lausitz/ Niederschlesien                             | 4             |
| Oberland                                                                     | 4             |
| Dresdnerisch/ Dresdner Sächsisch                                             | 3             |
| Leipziger Sächsisch                                                          | 3             |
| Harzer Dialekt/ Harz und Umgebung                                            | 3             |
| Hannoveranisch                                                               | 1             |
| Preußisch                                                                    | 1             |
| Platt                                                                        | 1             |
| Edelroller                                                                   | 1             |
| Görlitzer Sächsisch                                                          | 1             |
| Niedersorbisch                                                               | 1             |
| Obersorbisch                                                                 | 1             |
| Hochdeutsch mit lausitzer Einschlag                                          | 1             |
| Eichsfeld                                                                    | 1             |
| Rhön                                                                         | 1             |
| Übergang                                                                     | 1             |
| Mischung                                                                     | 1             |
| Halb hochdeutsch halb berlinisch                                             | 1             |
| Hessisch                                                                     | 0             |
| Niedersachsen                                                                | 0             |
| Norddeutsch-Platt                                                            | 0             |
| FREQUENZSTUFE 1                                                              |               |

Tabelle 4: Frequenzstufen der digitalisierten Dialekräume der lausitzischen Befragten

| Bezeichnungen                                                                                       | digitalisiert |
|-----------------------------------------------------------------------------------------------------|---------------|
| Sächsisch/ allgemein Sächsisch/ tief Sächsisch/ Sachsen/ ursächsisch/ normal sächsisch              | 23            |
| FREQUENZSTUFE 4                                                                                     |               |
| Thüringer Dialekt/ Thüringisch/ Thüringen                                                           | 17            |
| Anhaltiner/ Sachsen-Anhaltinisch/ Sachsen-Anhalt/ Anhaltinisch                                      | 15            |
| Bayern/ Frankendialekt/ Bayrisch/ Niederbayrisch/ Franken/ Fränkisch/ Oberfränkisch/ Unterfränkisch | 14            |
| FREQUENZSTUFE 3                                                                                     |               |
| Erzgebirgisch/ Sächsisch-Erzgebirgisch                                                              | 11            |
| Vogtländisch/ Sächsisch-Vogtländisch/ Vogtland                                                      | 8             |
| Dresdner/ Dresdnerisch/ Dresdner Sächsisch/ DD-Meißner                                              | 8             |
| FREQUENZSTUFE 2                                                                                     |               |
| Berliner/ Brandenburgisch/ Berlinerisch/ Berliner Dialekt/ Berliner Deutsch/ Preußisch              | 7             |
| Chemnitzerisch/ Chemnitzer Sächsisch                                                                | 4             |
| Leipzigerisch/ Leipziger Sächsisch                                                                  | 4             |
| Oberlausitz/ Oberlausitzer Dialekt/ Dialekt der Oberlausitz/ Rollendes R                            | 3             |
| Hallensisch/ Hallenser/ Hallisch                                                                    | 2             |
| Lausitzer Dialekt/ Lausitz                                                                          | 2             |
| Sorbisch                                                                                            | 2             |
| Obersorbisch                                                                                        | 1             |
| Niedersorbisch                                                                                      | 1             |
| Bautzner Dialekt                                                                                    | 1             |
| Niederlausitzer                                                                                     | 1             |
| Spreedialekt                                                                                        | 1             |
| Kyffhäuserdialekt                                                                                   | 1             |
| Thüringer Wald                                                                                      | 1             |
| Ostthüringisch                                                                                      | 1             |
| Nordwestsächsisch                                                                                   | 1             |
| Südwestsächsisch                                                                                    | 1             |
| Ostthüringisch                                                                                      | 1             |
| Sänger                                                                                              | 1             |
| Harzer Dialekt                                                                                      | 1             |
| Hessisch                                                                                            | 0             |
| Südthüringisch                                                                                      | 0             |
| Westerzgebirgisch                                                                                   | 0             |
| Norddeutsch                                                                                         | 0             |
| FREQUENZSTUFE 1                                                                                     |               |

Tabelle 5: Frequenzstufen der digitalisierten Dialekräume der osterländischen Befragten

| Bezeichnungen                                                                                   | digitalisiert |
|-------------------------------------------------------------------------------------------------|---------------|
| Bayrisch/ Fränkisch/ Oberfränkisch                                                              | 27            |
| Sächsisch/ Ursächsisch                                                                          | 25            |
| FREQUENZSTUFE 4                                                                                 |               |
| Vogtländisch/ Vogtland                                                                          | 18            |
| Erzgebirgisch                                                                                   | 18            |
| Thüringisch                                                                                     | 14            |
| FREQUENZSTUFE 3                                                                                 |               |
| Dresdnerisch/ Dresden Dialekt/ Dreysdnerisch/ Dresdner Mundart/ Dresdner Sächsisch              | 9             |
| Lausitzer Dialekt/ Lausitz/ Lausitzer Löffelroller/ Lausitzerisch/ Lausitzer Mundart/ Lausitzer | 8             |
| FREQUENZSTUFE 2                                                                                 |               |
| Leipzigerisch/ Leipzig Dialekt/ Leipzschersch/ Sächsisch Leipziger Art/ Leipziger Sächsisch     | 7             |
| Berliner Dialekt/ Berlinerisch/ Brandenburgisch                                                 | 5             |
| Sachsen-Anhaltinisch/ Anhaltinisch/ Anhalterisch                                                | 5             |
| wie Chemnitz/ Chemnitz Dialekt/ Chemnitzerisch/ Chemnitzer Mundart                              | 4             |
| Zwickisch/ Zwickauer Land                                                                       | 3             |
| Oberlausitz/ Oberlausitzer                                                                      | 3             |
| Plausch/ Plauener Vogtländisch                                                                  | 2             |
| Sorben/ Sorbisch                                                                                | 2             |
| Hessisch/ Hessener Dialekt                                                                      | 1             |
| Eisenach                                                                                        | 1             |
| Erlbach                                                                                         | 1             |
| Kernvogtländisch                                                                                | 1             |
| Vogtländisch-Erzgebirgisch                                                                      | 1             |
| Selb                                                                                            | 1             |
| Egerländisch-Böhmisch                                                                           | 1             |
| Frankenwald                                                                                     | 1             |
| Klingenthaler Dialekt-Klingenthaler Vogtländisch                                                | 1             |
| Mittelsächsisch                                                                                 | 1             |
| Erzgebirgsvorland                                                                               | 1             |
| Südsächsisch                                                                                    | 1             |
| Erzgebirgisch-Ostsächsisch                                                                      | 1             |
| Westsächsisch                                                                                   | 1             |
| Niederlausitzer Mundart                                                                         | 1             |
| Osthüringisch                                                                                   | 1             |
| Ostdeutsch                                                                                      | 1             |
| Westdeutsch                                                                                     | 1             |
| Osterzgebirgisch                                                                                | 1             |
| Westerzgebirgisch                                                                               | 1             |
| Mittelerzgebirgisch                                                                             | 1             |
| Brandenburger Sächsisch                                                                         | 1             |
| Norddeutsch                                                                                     | 0             |
| FREQUENZSTUFE 1                                                                                 |               |

Tabelle 6: Frequenzstufen der digitalisierten Dialekträume der vogtl.-erzgeb. Befragten

| Bezeichnungen                                                                                                    | digitalisiert |
|------------------------------------------------------------------------------------------------------------------|---------------|
| Sächsisch/ Ursachsen/ Sachsen/ ursächsisch                                                                       | 28            |
| Thüringisch/ extrem Thüringisch/ Diringisch/ Thüringen                                                           | 25            |
| FREQUENZSTUFE 4                                                                                                  |               |
| Fränkisch/ Bayrisch-Fränkisch/ Oberfränkisch/ Bayrisch/ Bayern/ Franken                                          | 19            |
| FREQUENZSTUFE 3                                                                                                  |               |
| Vogtländisch                                                                                                     | 11            |
| Anhaltinisch/ Sächsischanhaltinisch/ Sachsen-Anhalt                                                              | 9             |
| FREQUENZSTUFE 2                                                                                                  |               |
| Berlinisch/ Berlin/ Berliner/ Brandenburger-Berliner Dialekt/ Randberlinerisch/<br>Brandenburgisch/ Berlinerisch | 6             |
| Dresdner Sächsisch/ Sächsisch Dresden/ wie Dresden                                                               | 5             |
| Leipziger Sächsisch                                                                                              | 4             |
| Gersche Fettguschen/ Gersch/ Geraer                                                                              | 4             |
| Hallenser/ Hallenser Dialekt-Sachsen Anhaltinisch                                                                | 3             |
| Erzgebirgisch                                                                                                    | 3             |
| Spreewald/ Spreewald Dialekt-Lausitz-Dialekt                                                                     | 3             |
| Ostthüringisch-Sächsisch/ Thüringisch-Sächsisch                                                                  | 3             |
| Südthüringisch                                                                                                   | 3             |
| Sorben/ Sorbisch                                                                                                 | 2             |
| Oberlausitz                                                                                                      | 2             |
| Rhön/ Rhöndialekt-Bergthüringer Dialekt                                                                          | 2             |
| Harz/ Harzerdialekt                                                                                              | 2             |
| Jenenser Dialekt/ Jenenser-Jenänsisch                                                                            | 2             |
| Magdeburger Dialekt-Sachsen Anhaltinisch/ Magdeburger                                                            | 2             |
| Ostsächsisch                                                                                                     | 2             |
| Oberhessisch/ Nordhessisch                                                                                       | 2             |
| Unterhessisch/ Südthüringisch                                                                                    | 2             |
| Erfurter Dialekt/ wie Erfurt                                                                                     | 1             |
| Niedersächsisch                                                                                                  | 1             |
| Lausitz                                                                                                          | 1             |
| Thüringer-Wald-Dialekt                                                                                           | 1             |
| Thür.-Sächs.-Anhalt (Mischung)                                                                                   | 1             |
| Niederlausitz                                                                                                    | 1             |
| Nordthüringisch-Sächsisch                                                                                        | 1             |
| Schlesisch                                                                                                       | 1             |
| Mittelsächsisch                                                                                                  | 1             |
| Ostthüringisch                                                                                                   | 1             |
| Mittelthüringisch                                                                                                | 1             |
| Fränkisch-Thüringisch                                                                                            | 1             |
| Nordthüringisch                                                                                                  | 1             |
| Chemnitzer                                                                                                       | 1             |
| Nordhäusisch                                                                                                     | 1             |
| Mischung                                                                                                         | 1             |
| Hessisch                                                                                                         | 0             |
| Platt/ Plattdeutsch                                                                                              | 0             |
| Nord                                                                                                             | 0             |
| Mitteldeutsch-Mittelhochdeutsch                                                                                  | 0             |
| FREQUENZSTUFE 1                                                                                                  |               |

Tabelle 7: Frequenzstufen der digitalisierten Dialekräume der thüringischen Befragten

| Bezeichnungen                                                                                                                     | digitalisiert |
|-----------------------------------------------------------------------------------------------------------------------------------|---------------|
| Sächsisch/ Ursachen/ Ursächsisch/ reines Sächsisch                                                                                | 34            |
| FREQUENZSTUFE 4                                                                                                                   |               |
| Bayrisch/ Fränkisch/ Bayerisch/ Franken/ Oberfränkisch                                                                            | 18            |
| Thüringisch/ Thüringen/ Randthüringen/ Thüringerisch                                                                              | 18            |
| Berliner Dialekt/ Preußisch/ Berlin/ Berliner/ Berlinerisch/ Brandenburgisch/<br>Berlinisch/ Brandenburg/ Berlinern/ Randberliner | 15            |
| FREQUENZSTUFE 3                                                                                                                   |               |
| Anhaltinisch/ Anhaltisch/ (Sachsen) Anhaltinisch                                                                                  | 10            |
| Hallisch/ Hallesche Schäkse/ Hallenser Dialekt/ Hallensisch                                                                       | 8             |
| FREQUENZSTUFE 2                                                                                                                   |               |
| Vogtländisch/ Vogtland                                                                                                            | 7             |
| Sorbisch                                                                                                                          | 5             |
| Erzgebirge/ erzgebirgisch                                                                                                         | 4             |
| Dresdnerisch/ Dresdner Sächsisch                                                                                                  | 4             |
| Leipzigerisch/ Leipziger Lärchen/ Leipziger Sächsisch                                                                             | 4             |
| Magdeburgisch/ Magdeburgerisch                                                                                                    | 2             |
| Harzerisch/ Harzer Dialekt                                                                                                        | 2             |
| Hessisch/ Hessen                                                                                                                  | 1             |
| Nordosterländisch                                                                                                                 | 1             |
| Wittenbergisch                                                                                                                    | 1             |
| Bitterfeldsch                                                                                                                     | 1             |
| Halberstadter Ecke                                                                                                                | 1             |
| Mansfelder Land                                                                                                                   | 1             |
| Nordsächsisch                                                                                                                     | 1             |
| Chemnitzerisch                                                                                                                    | 1             |
| Südbrandenburgisch                                                                                                                | 1             |
| Südthüringisch                                                                                                                    | 1             |
| Übergang                                                                                                                          | 1             |
| Lausitz/ Rollender R/                                                                                                             | 0             |
| Rhön                                                                                                                              | 0             |
| Platt                                                                                                                             | 0             |
| Niedersächsisch                                                                                                                   | 0             |
| Norddeutsch                                                                                                                       | 0             |
| FREQUENZSTUFE 1                                                                                                                   |               |

Tabelle 8: Frequenzstufen der digitalisierten Dialekräume der Nordgruppe



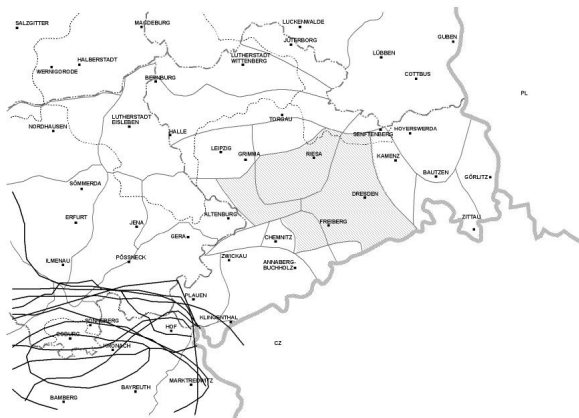

Abbildung 7: BAYR./FRÄNK. (Meißnische Gr.)

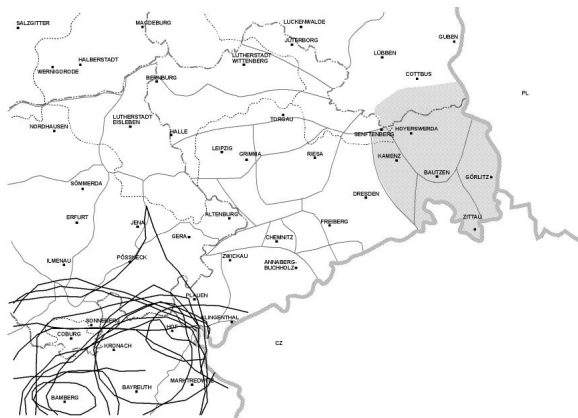

Abbildung 8: BAYR./FRÄNK. (Lausitzische Gr.)

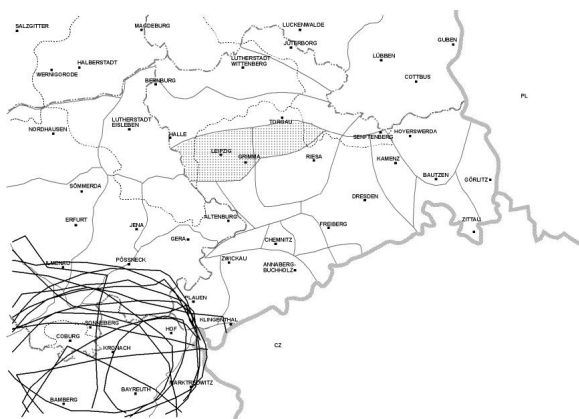

Abbildung 9: BAYR./FRÄNK. (Osterländische Gr.)

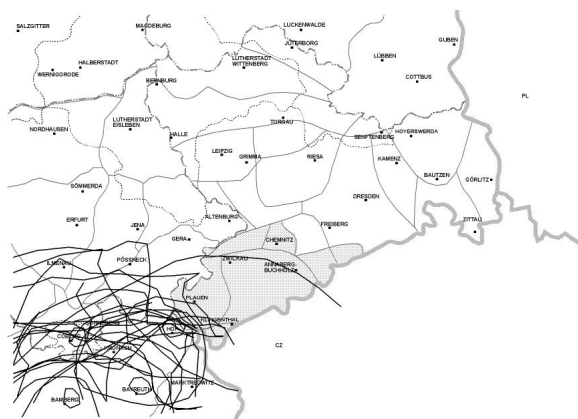

Abbildung 10: BAYR./FRÄNK. (Vogtl.-Erzgeb. Gr.)

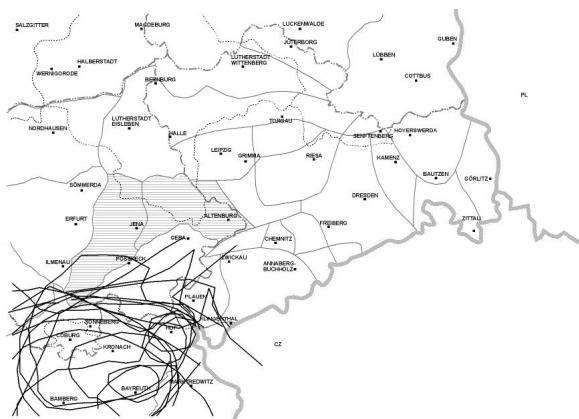

Abbildung 11: BAYR./FRÄNK. (Thüringische Gr.)

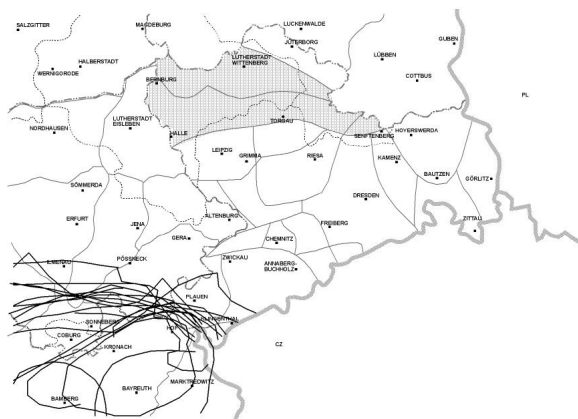

Abbildung 12: BAYR./FRÄNK. (Nordgr.)

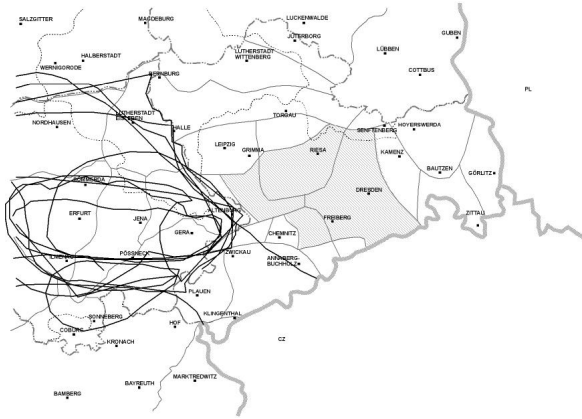

Abbildung 13: THÜRINGISCH (Meißnische Gr.)

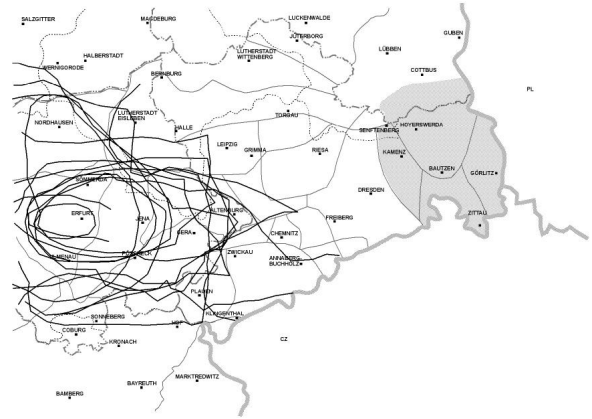

Abbildung 14: THÜRINGISCH (Lausitzische Gr.)

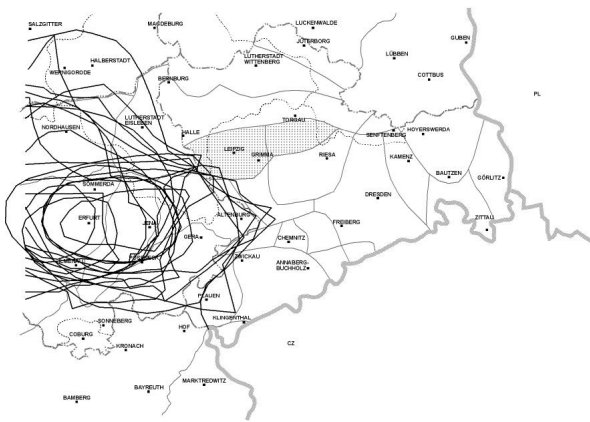

Abbildung 15: THÜRINGISCH (Osterländische Gr.)

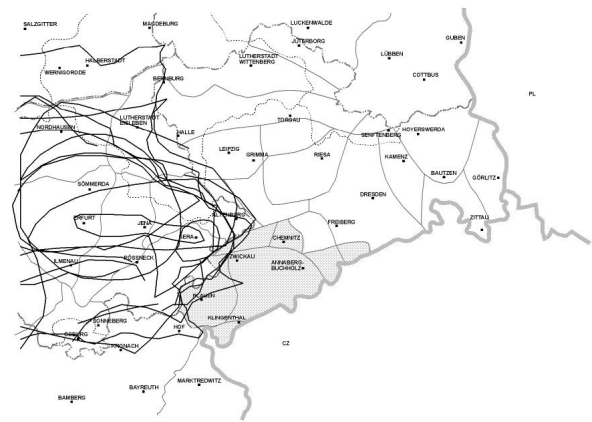

Abbildung 16: THÜRINGISCH (Vogtl.-Erzgeb. Gr.)

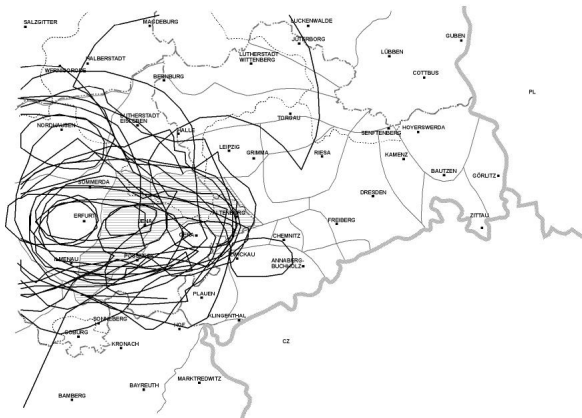

Abbildung 17: THÜRINGISCH (Thüringische Gr.)

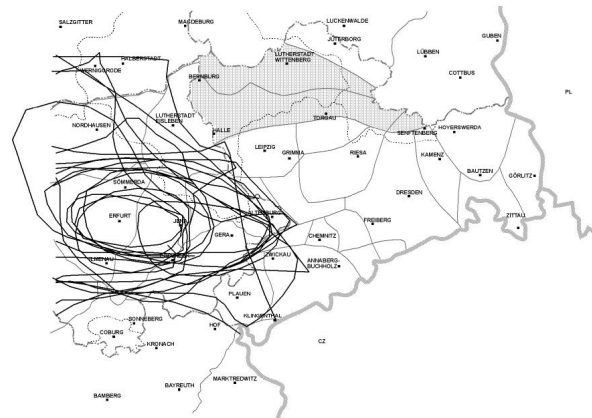

Abbildung 18: THÜRINGISCH (Nordgr.)



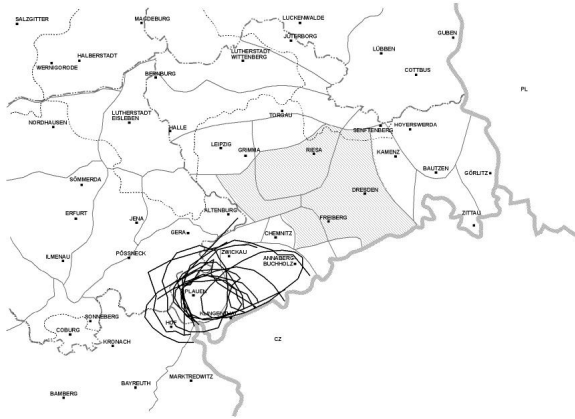

Abbildung 19: VOGTLÄNDISCH (Meißnische Gr.)

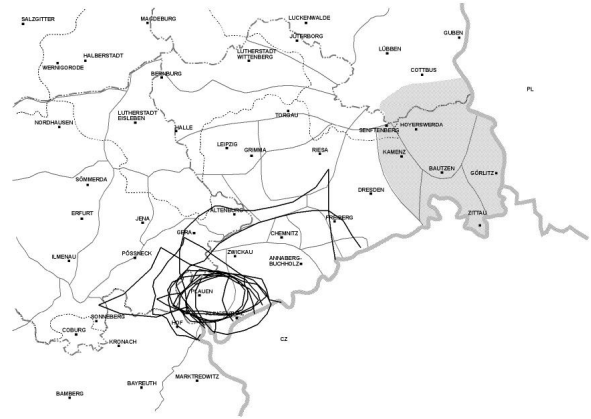

Abbildung 20: VOGTLÄNDISCH (Lausitzische Gr.)

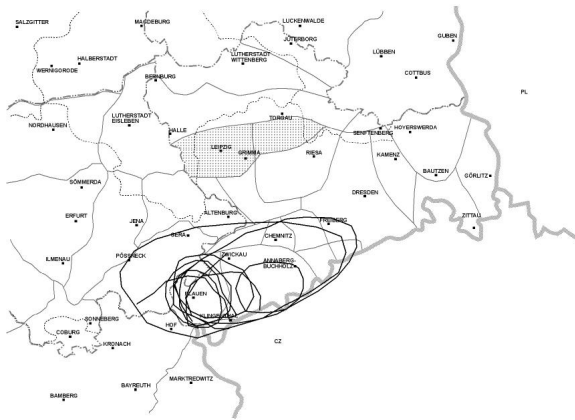

Abbildung 21: VOGTLÄNDISCH (Osterländische Gr.)

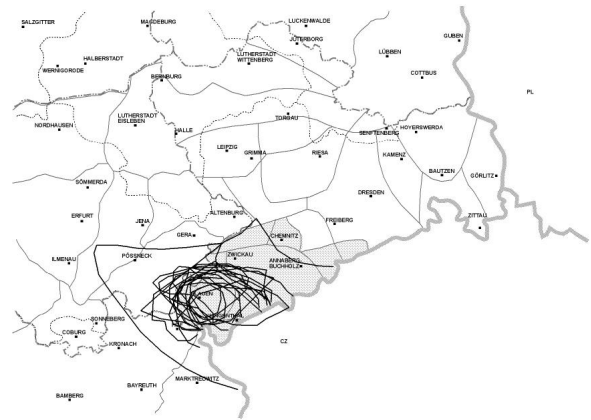

Abbildung 22: VOGTLÄNDISCH (Vogtl.-Erzgeb. Gr.)

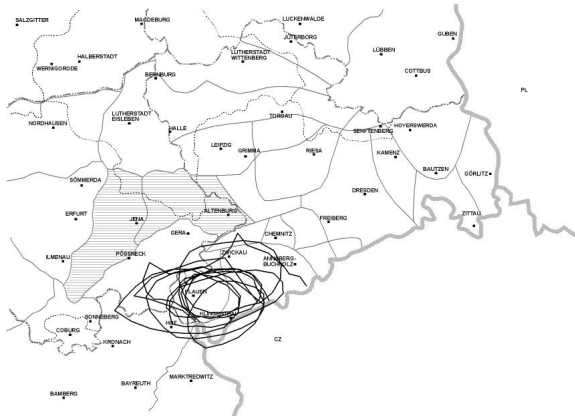

Abbildung 23: VOGTLÄNDISCH (Thüringische Gr.)

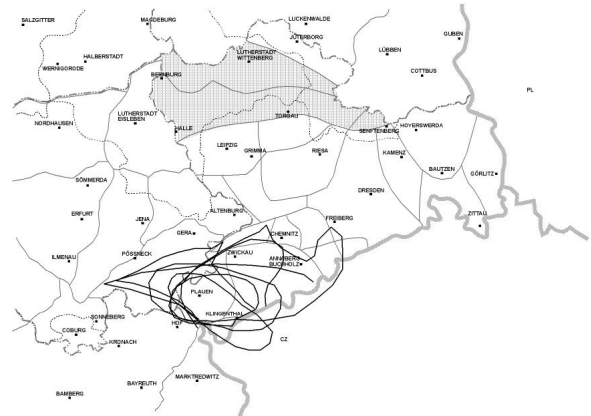

Abbildung 24: VOGTLÄNDISCH (Nordgr.)

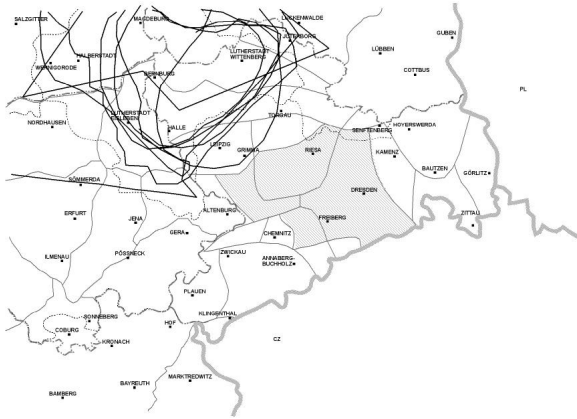

Abbildung 25: ANHALTISCH (Meißnische Gr.)

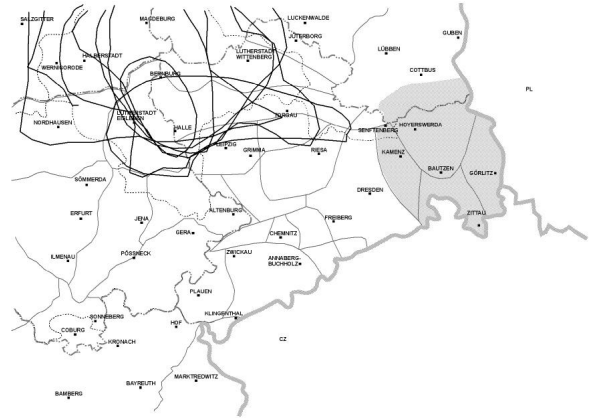

Abbildung 26: ANHALTISCH (Lausitzische Gr.)

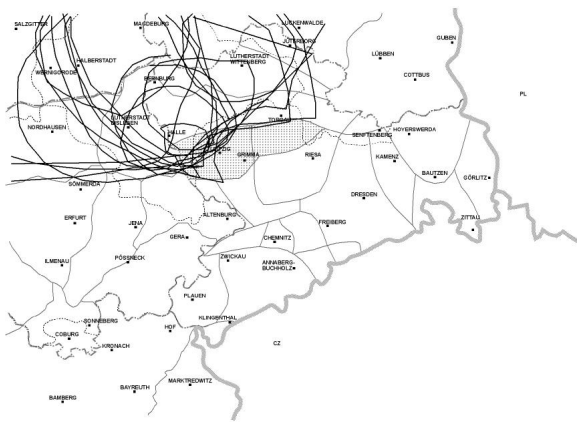

Abbildung 27: ANHALTISCH (Osterländische Gr.)

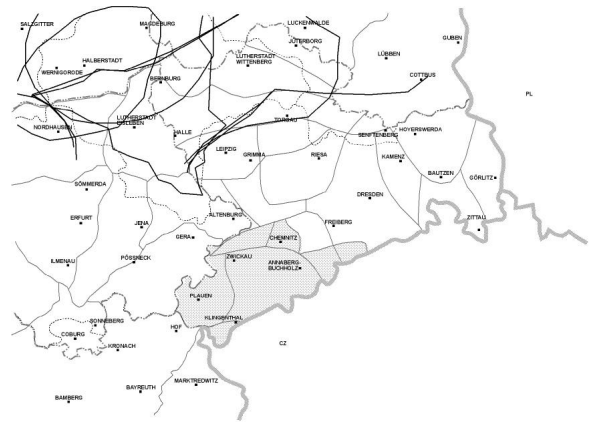

Abbildung 28: ANHALTISCH (Vogtl.-Erzgeb. Gr.)

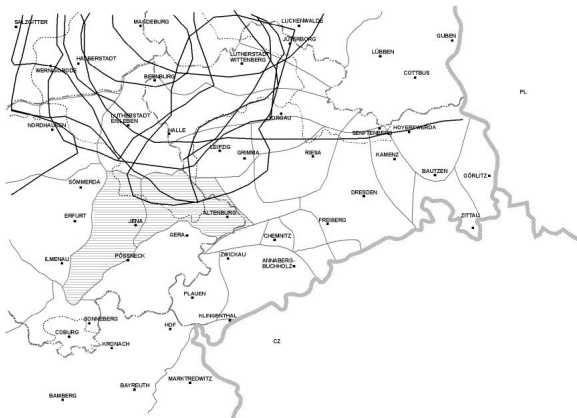

Abbildung 29: ANHALTISCH (Thüringische Gr.)

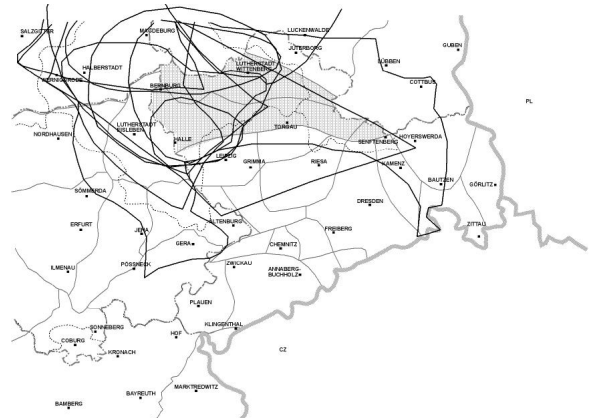

Abbildung 30: ANHALTISCH (Nordgr.)

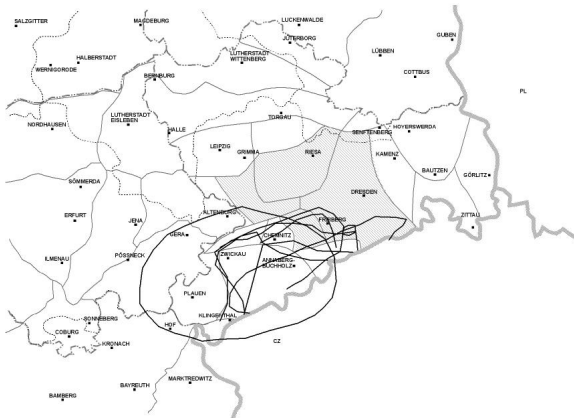

Abbildung 31: ERZGEBIRGISCH (Meißnische Gr.)

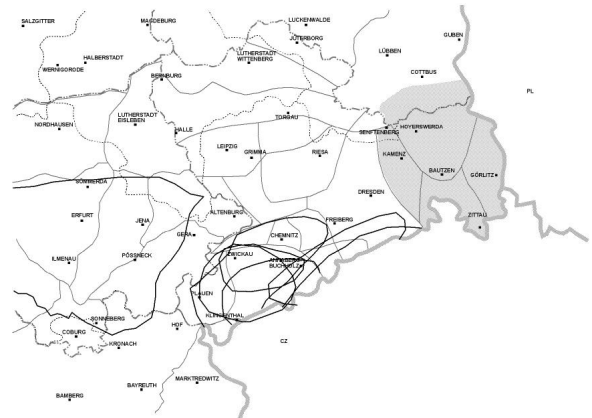

Abbildung 32: ERZGEBIRGISCH (Lausitzische Gr.)

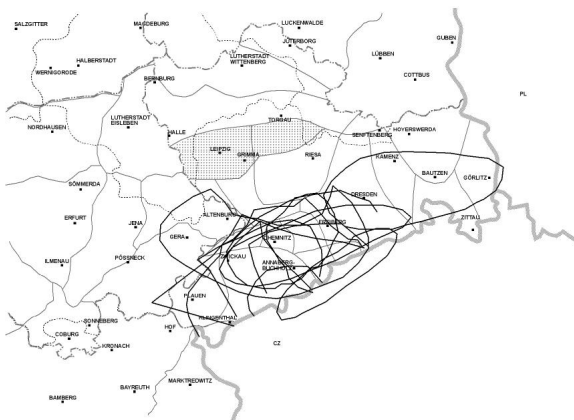

Abbildung 33: ERZGEBIRGISCH (Osterländische Gr.)

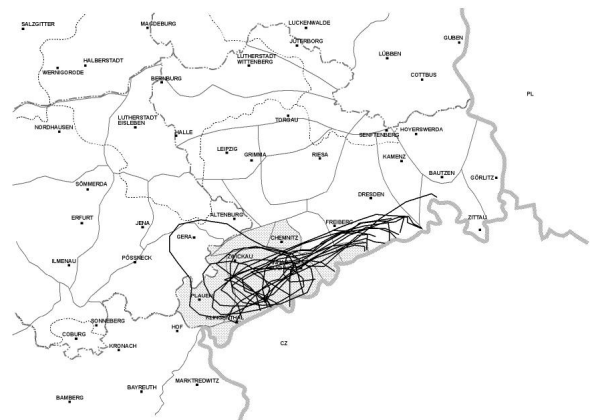

Abbildung 34: ERZGEBIRGISCH (Vogtl.-Erzgeb. Gr.)

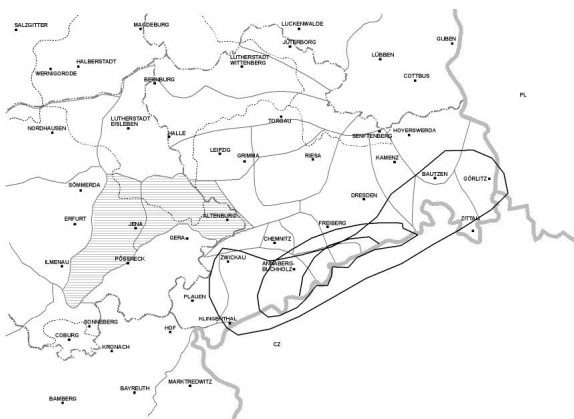

Abbildung 35: ERZGEBIRGISCH (Thüringische Gr.)

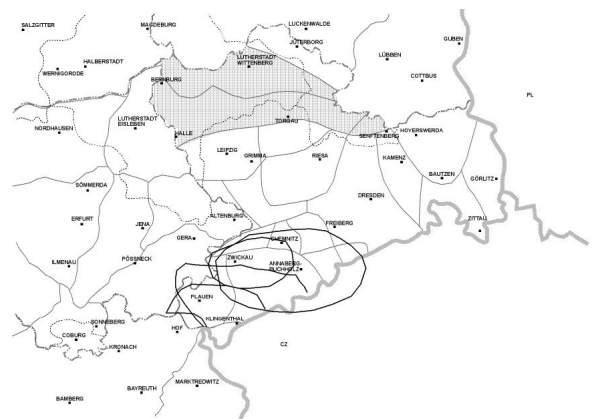

Abbildung 36: ERZGEBIRGISCH (Nordgr.)

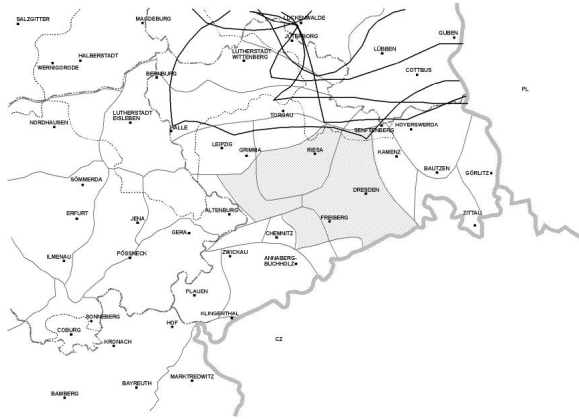

Abbildung 37: BERLINISCH (Meißnische Gr.)

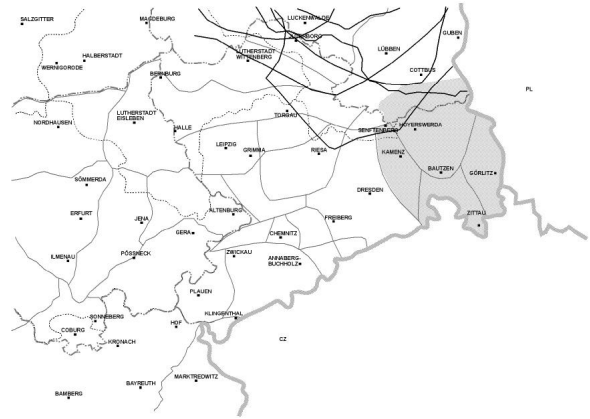

Abbildung 38: BERLINISCH (Lausitzische Gr.)

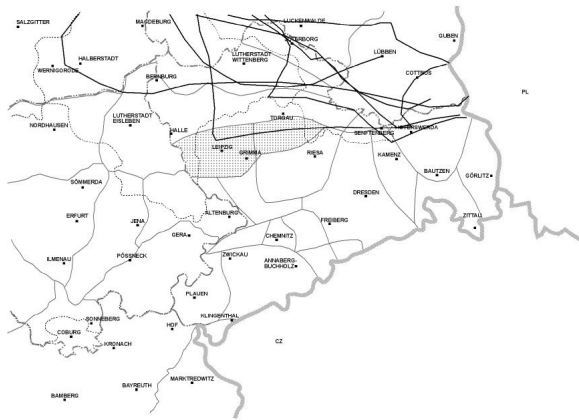

Abbildung 39: BERLINISCH (Osterländische Gr.)

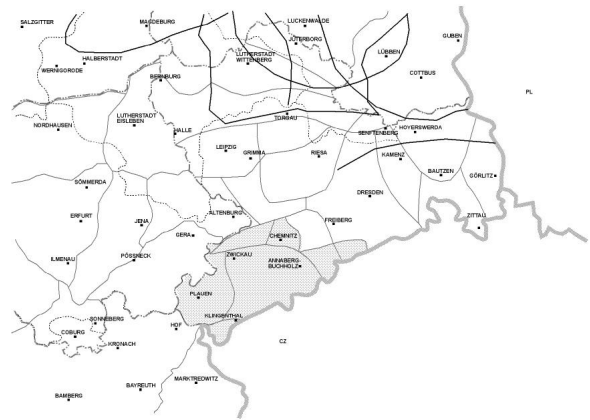

Abbildung 40: BERLINISCH (Vogtl.-Erzgeb. Gr.)

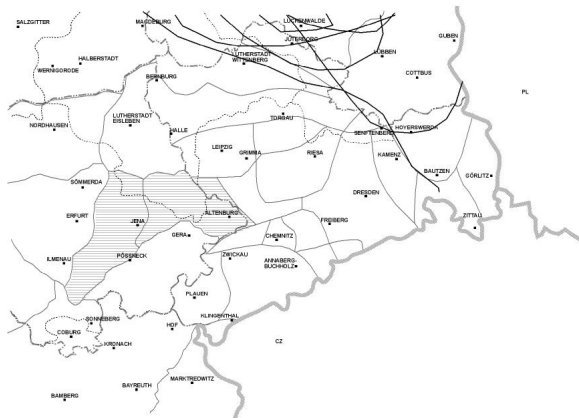

Abbildung 41: BERLINISCH (Thüringische Gr.)

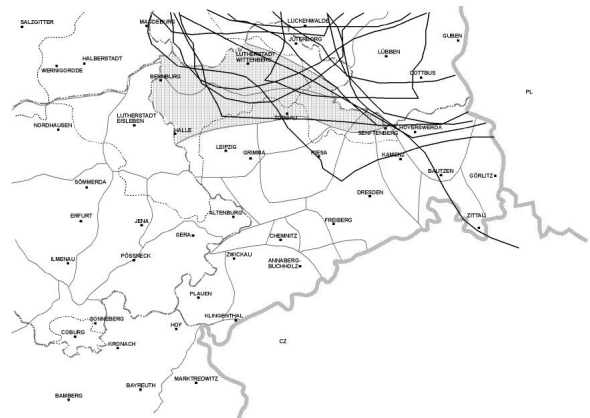

Abbildung 42: BERLINISCH (Nordgr.)

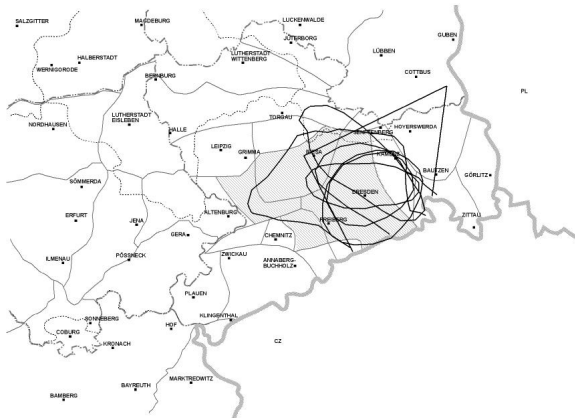

Abbildung 43: DRESDNERISCH (Meißnische Gr.)

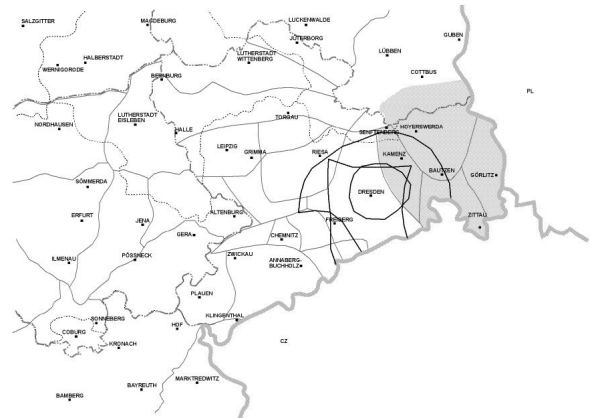

Abbildung 44: DRESDNERISCH (Lausitzische Gr.)

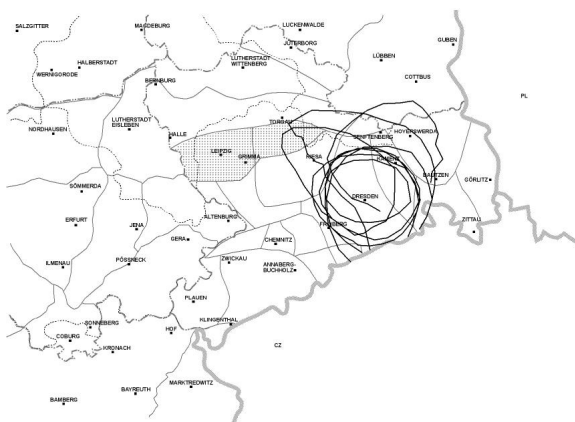

Abbildung 45: DRESDNERISCH (Osterländische Gr.)

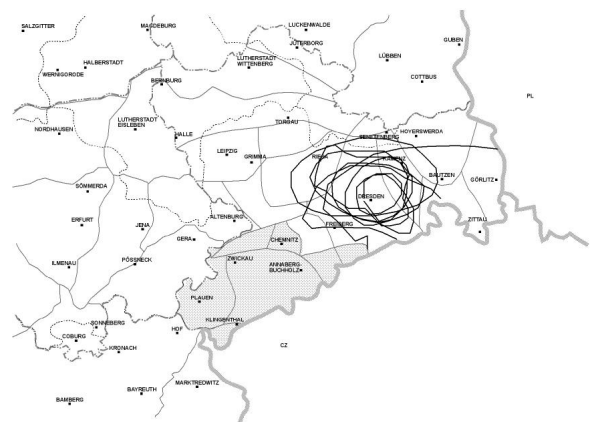

Abbildung 46: DRESDNERISCH (Vogtl.-Erzgeb. Gr.)

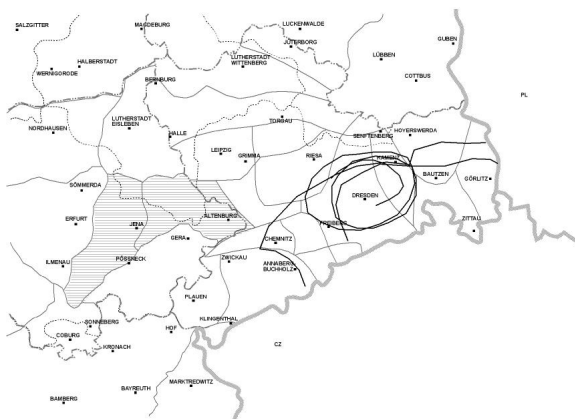

Abbildung 47: DRESDNERISCH (Thüringische Gr.)

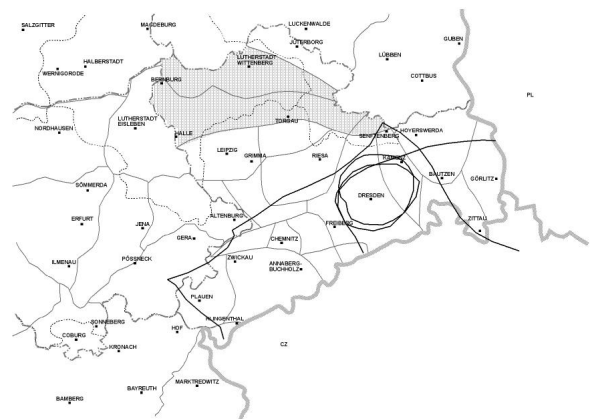

Abbildung 48: DRESDNERISCH (Nordgr.)

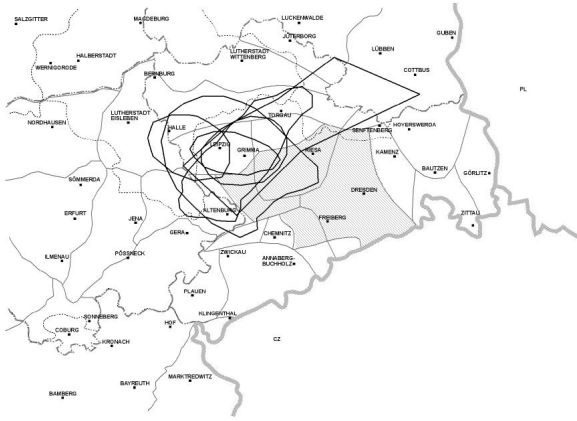

Abbildung 49: LEIPZIGERISCH (Meißnische Gr.)

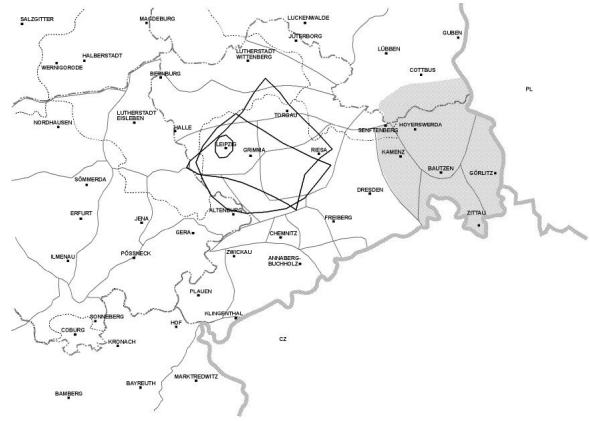

Abbildung 50: LEIPZIGERISCH (Lausitzische Gr.)

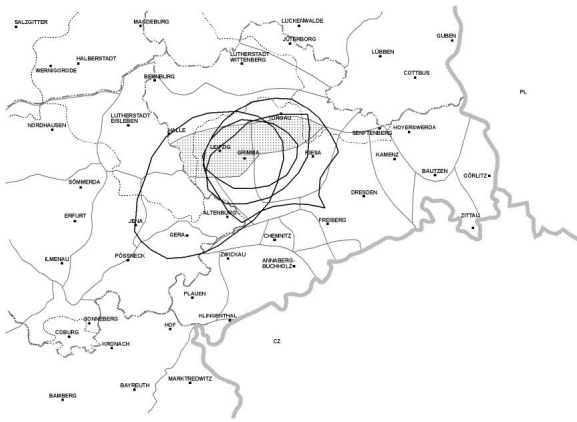

Abbildung 51: LEIPZIGERISCH (Osterländische Gr.)

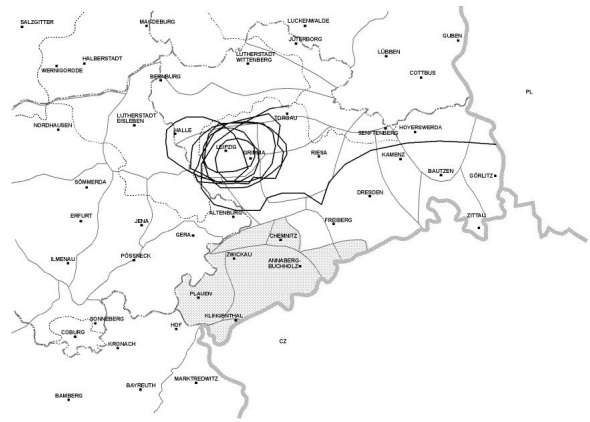

Abbildung 52: LEIPZIGERISCH (Vogtl.-Erzgeb. Gr.)

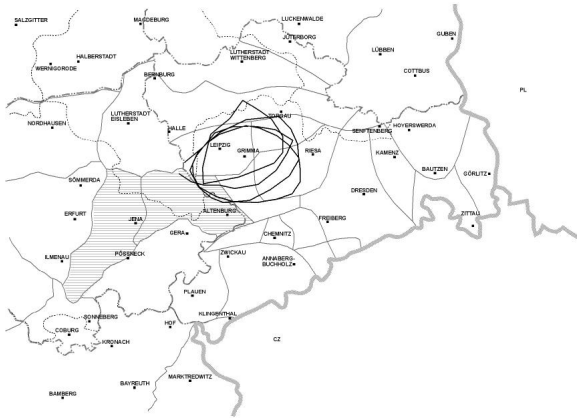

Abbildung 53: LEIPZIGERISCH (Thüringische Gr.)

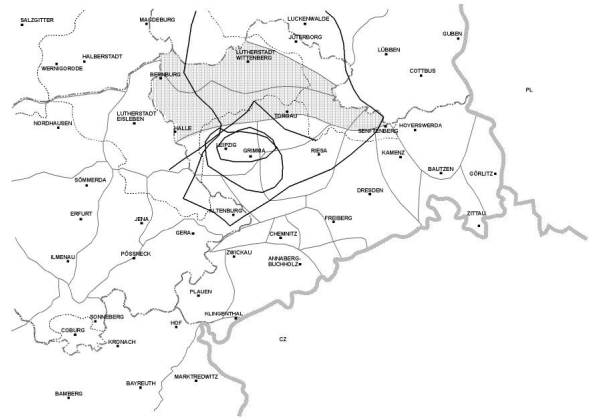

Abbildung 54: LEIPZIGERISCH (Nordgr.)

| Stadt                  | Meißn.<br>Gr. | Lausitz.<br>Gr. | Osterl.<br>Gr. | Vogt.-Erz.<br>Gr. | Thür.<br>Gr. | Nordgr. | Σ   |
|------------------------|---------------|-----------------|----------------|-------------------|--------------|---------|-----|
| Altenberg              | 26            | 24              | 14             | 22                | 13           | 9       | 108 |
| Altenburg              | 19            | 22              | 28             | 24                | 27           | 20      | 140 |
| Annaberg-Buchholz      | 29            | 30              | 27             | 27                | 23           | 22      | 158 |
| Auerbach               | 20            | 18              | 21             | 26                | 21           | 19      | 125 |
| Bad Brambach           | 15            | 11              | 17             | 25                | 22           | 15      | 105 |
| Bad Dübén              | 17            | 19              | 23             | 14                | 21           | 27      | 121 |
| Bad Dürrenberg         | 8             | 11              | 19             | 10                | 21           | 23      | 92  |
| Bad Elster             | 17            | 20              | 20             | 26                | 21           | 14      | 118 |
| Bad Gottleuba          | 21            | 17              | 12             | 12                | 12           | 7       | 81  |
| Bamberg                | 19            | 18              | 21             | 27                | 29           | 20      | 134 |
| Bautzen                | 29            | 30              | 29             | 26                | 25           | 26      | 165 |
| Bayreuth               | 23            | 21              | 25             | 28                | 29           | 24      | 150 |
| Bernburg               | 15            | 17              | 20             | 15                | 19           | 29      | 115 |
| Bischofswerda          | 24            | 27              | 20             | 18                | 23           | 21      | 133 |
| Bitterfeld             | 18            | 26              | 26             | 23                | 25           | 29      | 147 |
| Burgstädt              | 9             | 9               | 14             | 23                | 8            | 6       | 69  |
| Chemnitz               | 30            | 29              | 29             | 30                | 29           | 28      | 175 |
| Cottbus                | 26            | 29              | 26             | 25                | 25           | 26      | 157 |
| Crimmitschau           | 19            | 24              | 25             | 23                | 23           | 21      | 135 |
| Delitzsch              | 20            | 28              | 29             | 23                | 25           | 30      | 155 |
| Dessau                 | 20            | 23              | 30             | 22                | 25           | 28      | 148 |
| Dippoldiswalde         | 28            | 27              | 20             | 25                | 17           | 16      | 133 |
| Döbeln                 | 25            | 20              | 29             | 22                | 21           | 26      | 143 |
| Dresden                | 30            | 29              | 30             | 29                | 28           | 29      | 175 |
| Elsterwerda            | 22            | 29              | 19             | 21                | 15           | 22      | 128 |
| Finstertal             | 21            | 27              | 21             | 19                | 21           | 21      | 130 |
| Flöha                  | 23            | 21              | 22             | 26                | 17           | 16      | 125 |
| Freiberg               | 28            | 26              | 24             | 30                | 23           | 27      | 158 |
| Gera                   | 23            | 28              | 27             | 24                | 30           | 25      | 157 |
| Görlitz                | 25            | 28              | 26             | 26                | 23           | 26      | 154 |
| Greiz                  | 12            | 19              | 21             | 23                | 29           | 16      | 120 |
| Grimma                 | 25            | 25              | 29             | 24                | 25           | 26      | 154 |
| Großenhain             | 29            | 29              | 19             | 21                | 13           | 15      | 126 |
| Halle                  | 24            | 27              | 29             | 27                | 30           | 29      | 166 |
| Herzberg               | 14            | 21              | 16             | 7                 | 13           | 16      | 87  |
| Hof                    | 22            | 26              | 24             | 29                | 29           | 24      | 154 |
| Hohenstein-Ernstthal   | 24            | 23              | 21             | 28                | 26           | 19      | 141 |
| Hoyerswerda            | 27            | 30              | 22             | 24                | 23           | 23      | 149 |
| Jena                   | 25            | 24              | 24             | 25                | 27           | 24      | 149 |
| Johanngeorgenstadt     | 25            | 22              | 25             | 26                | 17           | 18      | 133 |
| Kamenz                 | 27            | 27              | 19             | 25                | 15           | 17      | 130 |
| Köthen                 | 19            | 19              | 25             | 21                | 25           | 30      | 139 |
| Leipzig                | 29            | 30              | 30             | 29                | 27           | 30      | 175 |
| Lübbenau               | 25            | 30              | 19             | 19                | 17           | 17      | 127 |
| Lutherstadt-Wittenberg | 19            | 24              | 25             | 25                | 24           | 30      | 147 |
| Markneukirchen         | 15            | 13              | 14             | 24                | 14           | 12      | 92  |
| Meißen                 | 29            | 30              | 30             | 29                | 24           | 25      | 167 |
| Merseburg              | 22            | 24              | 27             | 20                | 27           | 28      | 148 |
| Mittweida              | 19            | 19              | 22             | 27                | 20           | 17      | 124 |

|                                                     |      |      |      |      |      |      |       |
|-----------------------------------------------------|------|------|------|------|------|------|-------|
| Naumburg                                            | 18   | 22   | 20   | 22   | 28   | 26   | 136   |
| Olbernhau                                           | 24   | 16   | 16   | 23   | 10   | 12   | 101   |
| Oschatz                                             | 21   | 26   | 27   | 21   | 21   | 22   | 138   |
| Pirna                                               | 28   | 30   | 28   | 29   | 25   | 24   | 164   |
| Plauen                                              | 26   | 29   | 29   | 29   | 28   | 25   | 166   |
| Pössneck                                            | 14   | 13   | 15   | 15   | 26   | 13   | 96    |
| Querfurt                                            | 9    | 10   | 18   | 11   | 19   | 24   | 91    |
| Riesa                                               | 30   | 27   | 29   | 30   | 24   | 26   | 166   |
| Rochlitz                                            | 12   | 15   | 24   | 25   | 10   | 11   | 97    |
| Schleiz                                             | 17   | 19   | 20   | 21   | 30   | 16   | 123   |
| Schneeberg                                          | 26   | 24   | 22   | 29   | 22   | 23   | 146   |
| Sebnitz                                             | 27   | 28   | 17   | 22   | 16   | 15   | 125   |
| Seifhennersdorf                                     | 21   | 26   | 18   | 19   | 10   | 17   | 111   |
| Senftenberg                                         | 25   | 30   | 19   | 18   | 21   | 17   | 130   |
| Spremberg                                           | 15   | 29   | 16   | 18   | 15   | 16   | 109   |
| Torgau                                              | 19   | 26   | 30   | 20   | 25   | 25   | 145   |
| Treuen                                              | 11   | 6    | 7    | 23   | 9    | 4    | 60    |
| Weimar                                              | 23   | 27   | 24   | 27   | 29   | 26   | 156   |
| Weisswasser                                         | 23   | 30   | 20   | 20   | 20   | 20   | 133   |
| Wurzen                                              | 28   | 21   | 28   | 19   | 20   | 25   | 141   |
| Zeitz                                               | 14   | 22   | 22   | 20   | 22   | 25   | 125   |
| Zittau                                              | 29   | 29   | 23   | 26   | 24   | 23   | 154   |
| Zwickau                                             | 25   | 30   | 24   | 29   | 27   | 28   | 163   |
| $\sum$ (absolut)                                    | 2160 | 2160 | 2160 | 2160 | 2160 | 2160 | 12960 |
| $\sum$ (relativ)                                    | 1565 | 1685 | 1630 | 1660 | 1567 | 1531 | 9638  |
| in %                                                | 72.5 | 78   | 75.5 | 76.8 | 72.5 | 70.9 | 74.4  |
| Mittelwert der relativen Häufigkeiten (in %): 74.36 |      |      |      |      |      |      |       |

Tabelle 9: Sortierhäufigkeiten der Städte in den Gruppen



| Sortierhäufigkeiten aller Gruppen |         |                    |         |
|-----------------------------------|---------|--------------------|---------|
| Stadt                             | Nennung | Stadt              | Nennung |
| Chemnitz                          | 175     | Crimmitschau       | 135     |
| Dresden                           | 175     | Bamberg            | 134     |
| Leipzig                           | 175     | Bischofswerda      | 133     |
| Meißen                            | 167     | Dippoldiswalde     | 133     |
| Halle                             | 166     | Johanngeorgenstadt | 133     |
| Plauen                            | 166     | Weisswasser        | 133     |
| Riesa                             | 166     | Finsterwalde       | 130     |
| Bautzen                           | 165     | Kamenz             | 130     |
| Pirna                             | 164     | Senftenberg        | 130     |
| Zwickau                           | 163     | Elsterwerda        | 128     |
| Annaberg-Buchholz                 | 158     | Lübbenau           | 127     |
| Freiberg                          | 158     | Großenhain         | 126     |
| Cottbus                           | 157     | Auerbach           | 125     |
| Gera                              | 157     | Flöha              | 125     |
| Weimar                            | 156     | Sebnitz            | 125     |
| Delitzsch                         | 155     | Zeitz              | 125     |
| Görlitz                           | 154     | Mittweida          | 124     |
| Grimma                            | 154     | Schleiz            | 123     |
| Hof                               | 154     | Bad Dübén          | 121     |
| Zittau                            | 154     | Greiz              | 120     |
| Bayreuth                          | 150     | Bad Elster         | 118     |
| Hoyerswerda                       | 149     | Bernburg           | 115     |
| Jena                              | 149     | Seifhennersdorf    | 111     |
| Dessau                            | 148     | Spremberg          | 109     |
| Merseburg                         | 148     | Altenberg          | 108     |
| Bitterfeld                        | 147     | Bad Brambach       | 105     |
| Lutherstadt-Wittenberg            | 147     | Olbernhau          | 101     |
| Schneeberg                        | 146     | Rochlitz           | 97      |
| Torgau                            | 145     | Pösssneck          | 96      |
| Döbeln                            | 143     | Bad Dürrenberg     | 92      |
| Hohenstein-Ernstthal              | 141     | Markneukirchen     | 92      |
| Wurzen                            | 141     | Querfurt           | 91      |
| Altenburg                         | 140     | Herzberg           | 87      |
| Köthen                            | 139     | Bad Gottleuba      | 81      |
| Oschatz                           | 138     | Burgstädt          | 69      |
| Naumburg                          | 136     | Treuen             | 60      |

Tabelle 10: Sortierhäufigkeiten der Städte insgesamt

| Stadt                | Nennung | Stadt                  | Nennung |
|----------------------|---------|------------------------|---------|
| Chemnitz             | 30      | Weisswasser            | 23      |
| Dresden              | 30      | Elsterwerda            | 22      |
| Riesa                | 30      | Hof                    | 22      |
| Annaberg-Buchholz    | 29      | Merseburg              | 22      |
| Bautzen              | 29      | Bad Gottleuba          | 21      |
| Großenhain           | 29      | Finsterwalde           | 21      |
| Leipzig              | 29      | Oschatz                | 21      |
| Meißen               | 29      | Seifhennersdorf        | 21      |
| Zittau               | 29      | Auerbach               | 20      |
| Dippoldiswalde       | 28      | Delitzsch              | 20      |
| Freiberg             | 28      | Dessau                 | 20      |
| Pirna                | 28      | Altenburg              | 19      |
| Wurzen               | 28      | Bamberg                | 19      |
| Hoyerswerda          | 27      | Crimmitschau           | 19      |
| Kamenz               | 27      | Köthen                 | 19      |
| Sebnitz              | 27      | Lutherstadt-Wittenberg | 19      |
| Altenberg            | 26      | Mittweida              | 19      |
| Cottbus              | 26      | Torgau                 | 19      |
| Plauen               | 26      | Bitterfeld             | 18      |
| Schneeberg           | 26      | Naumburg               | 18      |
| Döbeln               | 25      | Bad Dübén              | 17      |
| Görlitz              | 25      | Bad Elster             | 17      |
| Grimma               | 25      | Schleiz                | 17      |
| Jena                 | 25      | Bad Brambach           | 15      |
| Johanngeorgenstadt   | 25      | Bernburg               | 15      |
| Lübbenau             | 25      | Markneukirchen         | 15      |
| Senftenberg          | 25      | Spremberg              | 15      |
| Zwickau              | 25      | Herzberg               | 14      |
| Bischofswerda        | 24      | Pösssneck              | 14      |
| Halle                | 24      | Zeitz                  | 14      |
| Hohenstein-Ernstthal | 24      | Greiz                  | 12      |
| Olbernhau            | 24      | Rochlitz               | 12      |
| Bayreuth             | 23      | Treuen                 | 11      |
| Flöha                | 23      | Burgstädt              | 9       |
| Gera                 | 23      | Querfurt               | 9       |
| Weimar               | 23      | Bad Dürrenberg         | 8       |

Tabelle 11: Sortierhäufigkeiten der meißnischen Befragten

| Stadt             | Nennung | Stadt                  | Nennung |
|-------------------|---------|------------------------|---------|
| Annaberg-Buchholz | 30      | Altenberg              | 24      |
| Bautzen           | 30      | Crimmitschau           | 24      |
| Hoyerswerda       | 30      | Jena                   | 24      |
| Leipzig           | 30      | Lutherstadt-Wittenberg | 24      |
| Lübbenau          | 30      | Merseburg              | 24      |
| Meißen            | 30      | Schneeberg             | 24      |
| Pirna             | 30      | Dessau                 | 23      |
| Senftenberg       | 30      | Hohenstein-Ernstthal   | 23      |
| Weisswasser       | 30      | Altenburg              | 22      |
| Zwickau           | 30      | Johanngeorgenstadt     | 22      |
| Chemnitz          | 29      | Naumburg               | 22      |
| Cottbus           | 29      | Zeitz                  | 22      |
| Dresden           | 29      | Bayreuth               | 21      |
| Elsterwerda       | 29      | Flöha                  | 21      |
| Großenhain        | 29      | Herzberg               | 21      |
| Plauen            | 29      | Wurzen                 | 21      |
| Spremberg         | 29      | Bad Elster             | 20      |
| Zittau            | 29      | Döbeln                 | 20      |
| Delitzsch         | 28      | Bad Dübén              | 19      |
| Gera              | 28      | Greiz                  | 19      |
| Görlitz           | 28      | Köthen                 | 19      |
| Sebnitz           | 28      | Mittweida              | 19      |
| Bischofswerda     | 27      | Schleiz                | 19      |
| Dippoldiswalde    | 27      | Auerbach               | 18      |
| Finstertal        | 27      | Bamberg                | 18      |
| Halle             | 27      | Bad Gottleuba          | 17      |
| Kamenz            | 27      | Bernburg               | 17      |
| Riesa             | 27      | Olbernhau              | 16      |
| Weimar            | 27      | Rochlitz               | 15      |
| Bitterfeld        | 26      | Markneukirchen         | 13      |
| Freiberg          | 26      | Pörsneck               | 13      |
| Hof               | 26      | Bad Brambach           | 11      |
| Oschatz           | 26      | Bad Dürrenberg         | 11      |
| Seiffhennersdorf  | 26      | Querfurt               | 10      |
| Torgau            | 26      | Burgstädt              | 9       |
| Grimma            | 25      | Treuen                 | 6       |

Tabelle 12: Sortierhäufigkeiten der lausitzischen Befragten

| Stadt                  | Nennung | Stadt                | Nennung |
|------------------------|---------|----------------------|---------|
| Dessau                 | 30      | Flöha                | 22      |
| Dresden                | 30      | Hoyerswerda          | 22      |
| Leipzig                | 30      | Mittweida            | 22      |
| Meißen                 | 30      | Schneeberg           | 22      |
| Torgau                 | 30      | Zeitz                | 22      |
| Bautzen                | 29      | Auerbach             | 21      |
| Chemnitz               | 29      | Bamberg              | 21      |
| Delitzsch              | 29      | Finsterwalde         | 21      |
| Döbeln                 | 29      | Greiz                | 21      |
| Grimma                 | 29      | Hohenstein-Ernstthal | 21      |
| Halle                  | 29      | Bad Elster           | 20      |
| Plauen                 | 29      | Bernburg             | 20      |
| Riesa                  | 29      | Bischofswerda        | 20      |
| Altenburg              | 28      | Dippoldiswalde       | 20      |
| Pirna                  | 28      | Naumburg             | 20      |
| Wurzen                 | 28      | Schleiz              | 20      |
| Annaberg-Buchholz      | 27      | Weisswasser          | 20      |
| Gera                   | 27      | Bad Dürrenberg       | 19      |
| Merseburg              | 27      | Elsterwerda          | 19      |
| Oschatz                | 27      | Großenhain           | 19      |
| Bitterfeld             | 26      | Kamenz               | 19      |
| Cottbus                | 26      | Lübbenau             | 19      |
| Görlitz                | 26      | Senftenberg          | 19      |
| Bayreuth               | 25      | Querfurt             | 18      |
| Crimmitschau           | 25      | Seiffhennersdorf     | 18      |
| Johanngeorgenstadt     | 25      | Bad Brambach         | 17      |
| Köthen                 | 25      | Sebnitz              | 17      |
| Lutherstadt-Wittenberg | 25      | Herzberg             | 16      |
| Freiberg               | 24      | Olbernhau            | 16      |
| Hof                    | 24      | Spremberg            | 16      |
| Jena                   | 24      | Pössa                | 15      |
| Rochlitz               | 24      | Altenberg            | 14      |
| Weimar                 | 24      | Burgstädt            | 14      |
| Zwickau                | 24      | Markneukirchen       | 14      |
| Bad Dübener            | 23      | Bad Gottleuba        | 12      |
| Zittau                 | 23      | Treuen               | 7       |

Tabelle 13: Sortierhäufigkeiten der osterländischen Befragten

| Stadt                  | Nennung | Stadt            | Nennung |
|------------------------|---------|------------------|---------|
| Chemnitz               | 30      | Markneukirchen   | 24      |
| Freiberg               | 30      | Bitterfeld       | 23      |
| Riesa                  | 30      | Burgstädt        | 23      |
| Dresden                | 29      | Crimmitschau     | 23      |
| Hof                    | 29      | Delitzsch        | 23      |
| Leipzig                | 29      | Greiz            | 23      |
| Meißen                 | 29      | Olbernhau        | 23      |
| Pirna                  | 29      | Treuen           | 23      |
| Plauen                 | 29      | Altenberg        | 22      |
| Schneeberg             | 29      | Dessau           | 22      |
| Zwickau                | 29      | Döbeln           | 22      |
| Bayreuth               | 28      | Naumburg         | 22      |
| Hohenstein-Ernstthal   | 28      | Sebnitz          | 22      |
| Annaberg-Buchholz      | 27      | Elsterwerda      | 21      |
| Bamberg                | 27      | Großhain         | 21      |
| Halle                  | 27      | Köthen           | 21      |
| Mittweida              | 27      | Oschatz          | 21      |
| Weimar                 | 27      | Schleiz          | 21      |
| Auerbach               | 26      | Merseburg        | 20      |
| Bad Elster             | 26      | Torgau           | 20      |
| Bautzen                | 26      | Weisswasser      | 20      |
| Flöha                  | 26      | Zeitz            | 20      |
| Görlitz                | 26      | Finsterwalde     | 19      |
| Johanngeorgenstadt     | 26      | Lübbenau         | 19      |
| Zittau                 | 26      | Seiffhennersdorf | 19      |
| Bad Brambach           | 25      | Wurzen           | 19      |
| Cottbus                | 25      | Bischofswerda    | 18      |
| Dippoldiswalde         | 25      | Senftenberg      | 18      |
| Jena                   | 25      | Spremberg        | 18      |
| Kamenz                 | 25      | Bernburg         | 15      |
| Lutherstadt-Wittenberg | 25      | Pössneck         | 15      |
| Rochlitz               | 25      | Bad Dübén        | 14      |
| Altenburg              | 24      | Bad Gottleuba    | 12      |
| Gera                   | 24      | Querfurt         | 11      |
| Grimma                 | 24      | Bad Dürrenberg   | 10      |
| Hoyerswerda            | 24      | Herzberg         | 7       |

Tabelle 14: Sortierhäufigkeiten der vogtl.-erzgeb. Befragten

| Stadt                  | Nennung | Stadt              | Nennung |
|------------------------|---------|--------------------|---------|
| Gera                   | 30      | Görlitz            | 23      |
| Halle                  | 30      | Hoyerswerda        | 23      |
| Schleiz                | 30      | Bad Brambach       | 22      |
| Bamberg                | 29      | Schneeberg         | 22      |
| Bayreuth               | 29      | Zeitz              | 22      |
| Chemnitz               | 29      | Auerbach           | 21      |
| Greiz                  | 29      | Bad Dübén          | 21      |
| Hof                    | 29      | Bad Dürrenberg     | 21      |
| Weimar                 | 29      | Bad Elster         | 21      |
| Dresden                | 28      | Döbeln             | 21      |
| Naumburg               | 28      | Finsterwalde       | 21      |
| Plauen                 | 28      | Oschatz            | 21      |
| Altenburg              | 27      | Senftenberg        | 21      |
| Jena                   | 27      | Mittweida          | 20      |
| Leipzig                | 27      | Weisswasser        | 20      |
| Merseburg              | 27      | Wurzen             | 20      |
| Zwickau                | 27      | Bernburg           | 19      |
| Hohenstein-Ernstthal   | 26      | Querfurt           | 19      |
| Pößneck                | 26      | Dippoldiswalde     | 17      |
| Bautzen                | 25      | Flöha              | 17      |
| Bitterfeld             | 25      | Johanngeorgenstadt | 17      |
| Cottbus                | 25      | Lübbenau           | 17      |
| Delitzsch              | 25      | Sebnitz            | 16      |
| Dessau                 | 25      | Elsterwerda        | 15      |
| Grimma                 | 25      | Kamenz             | 15      |
| Köthen                 | 25      | Spremberg          | 15      |
| Pirna                  | 25      | Markneukirchen     | 14      |
| Torgau                 | 25      | Altenberg          | 13      |
| Lutherstadt-Wittenberg | 24      | Großenhain         | 13      |
| Meißen                 | 24      | Herzberg           | 13      |
| Riesa                  | 24      | Bad Gottleuba      | 12      |
| Zittau                 | 24      | Olbernhau          | 10      |
| Annaberg-Buchholz      | 23      | Rochlitz           | 10      |
| Bischofswerda          | 23      | Seifhennersdorf    | 10      |
| Crimmitschau           | 23      | Treuen             | 9       |
| Freiberg               | 23      | Burgstädt          | 8       |

Tabelle 15: Sortierhäufigkeiten der thüringischen Befragten

| Stadt                  | Nennung | Stadt                | Nennung |
|------------------------|---------|----------------------|---------|
| Delitzsch              | 30      | Zittau               | 23      |
| Köthen                 | 30      | Annaberg-Buchholz    | 22      |
| Leipzig                | 30      | Elsterwerda          | 22      |
| Lutherstadt-Wittenberg | 30      | Oschatz              | 22      |
| Bernburg               | 29      | Bischofswerda        | 21      |
| Bitterfeld             | 29      | Crimmitschau         | 21      |
| Dresden                | 29      | Finsterwalde         | 21      |
| Halle                  | 29      | Altenburg            | 20      |
| Chemnitz               | 28      | Bamberg              | 20      |
| Dessau                 | 28      | Weisswasser          | 20      |
| Merseburg              | 28      | Auerbach             | 19      |
| Zwickau                | 28      | Hohenstein-Ernstthal | 19      |
| Bad Dübén              | 27      | Johanngeorgenstadt   | 18      |
| Freiberg               | 27      | Kamenz               | 17      |
| Bautzen                | 26      | Lübbenau             | 17      |
| Cottbus                | 26      | Mittweida            | 17      |
| Döbeln                 | 26      | Seiffhennersdorf     | 17      |
| Görlitz                | 26      | Senftenberg          | 17      |
| Grimma                 | 26      | Dippoldiswalde       | 16      |
| Naumburg               | 26      | Flöha                | 16      |
| Riesa                  | 26      | Greiz                | 16      |
| Weimar                 | 26      | Herzberg             | 16      |
| Gera                   | 25      | Schleiz              | 16      |
| Meißen                 | 25      | Spremberg            | 16      |
| Plauen                 | 25      | Bad Brambach         | 15      |
| Torgau                 | 25      | Großhain             | 15      |
| Wurzen                 | 25      | Sebnitz              | 15      |
| Zeitz                  | 25      | Bad Elster           | 14      |
| Bayreuth               | 24      | Pössneck             | 13      |
| Hof                    | 24      | Markneukirchen       | 12      |
| Jena                   | 24      | Olbernhau            | 12      |
| Pirna                  | 24      | Rochlitz             | 11      |
| Querfurt               | 24      | Altenberg            | 9       |
| Bad Dürrenberg         | 23      | Bad Gottleuba        | 7       |
| Hoyerswerda            | 23      | Burgstädt            | 6       |
| Schneeberg             | 23      | Treuen               | 4       |

Tabelle 16: Sortierhäufigkeiten der Nordgruppe

|                                  |                     |
|----------------------------------|---------------------|
| Normalisierter Roh-Stress        | .06375              |
| Stress-I                         | .25250 <sup>2</sup> |
| Stress-II                        | .36702 <sup>3</sup> |
| S-Stress                         | .04160 <sup>4</sup> |
| Erklärte Streuung (D.A.F.)       | .93625              |
| Kongruenzkoeffizient nach Tucker | .96760              |

Tabelle 17: STRESS- und Anpassungsmaße bei eindimensionaler Lösung (meiß. Gr.)

|                                  |                     |
|----------------------------------|---------------------|
| Normalisierter Roh-STRESS        | .01517              |
| Stress-I                         | .12318 <sup>5</sup> |
| Stress-II                        | .26204 <sup>6</sup> |
| S-Stress                         | .02359 <sup>7</sup> |
| Erklärte Streuung (D.A.F.)       | .98483              |
| Kongruenzkoeffizient nach Tucker | .99238              |

Tabelle 18: STRESS- und Anpassungsmaße bei zweidimensionaler Lösung (meiß. Gr.)

|                      | Dimension |       |
|----------------------|-----------|-------|
|                      | 1         | 2     |
| Altenberg            | .019      | -.301 |
| Annaberg-Buchholz    | .317      | -.309 |
| Bautzen              | -.455     | -.482 |
| Bayreuth             | 1.021     | -.324 |
| Bischofswerda        | -.338     | -.321 |
| Chemnitz             | .393      | .055  |
| Cottbus              | -.931     | -.051 |
| Dippoldiswalde       | -.075     | -.261 |
| Döbeln               | -.251     | .363  |
| Dresden              | -.099     | -.068 |
| Elsterwerda          | -.574     | .193  |
| Flöha                | .493      | .277  |
| Freiberg             | .232      | -.152 |
| Gera                 | .562      | .843  |
| Görlitz              | -.476     | -.402 |
| Grimma               | -.004     | .376  |
| Großenhain           | -.256     | .049  |
| Halle                | -.187     | .816  |
| Hof                  | 1.550     | -.804 |
| Hohenstein-Ernstthal | .615      | -.065 |

|                    | Dimension |       |
|--------------------|-----------|-------|
|                    | 1         | 2     |
| Hoyerswerda        | -.564     | -.169 |
| Jena               | .526      | .835  |
| Johanngeorgenstadt | .694      | .013  |
| Kamenz             | -.402     | -.326 |
| Leipzig            | -.261     | .543  |
| Lübbenau           | -.953     | -.276 |
| Meißen             | -.171     | -.079 |
| Merseburg          | -.108     | .836  |
| Olbernhau          | .348      | -.196 |
| Pirna              | -.244     | -.083 |
| Plauen             | .569      | -.654 |
| Riesa              | -.095     | .096  |
| Schneeberg         | .585      | -.011 |
| Sebnitz            | -.203     | -.477 |
| Senftenberg        | -.756     | .009  |
| Weimar             | .416      | .958  |
| Weiswasser         | -.739     | -.062 |
| Wurzen             | -.263     | .442  |
| Zittau             | -.514     | -.622 |
| Zwickau            | .580      | -.211 |

Tabelle 19: Endgültige Koordinaten der gültigen Städte (meiß. Gr.)

<sup>2</sup> Faktor für optimale Skalierung = 1.068.<sup>3</sup> Faktor für optimale Skalierung = 1.068.<sup>4</sup> Faktor für optimale Skalierung = 1.043.<sup>5</sup> Faktor für optimale Skalierung = 1.015.<sup>6</sup> Faktor für optimale Skalierung = 1.015.<sup>7</sup> Faktor für optimale Skalierung = 1.001.



| Stadt                | 10 Cluster | Stadt       | 10 Cluster |
|----------------------|------------|-------------|------------|
| Altenberg            | 1          | Görlitz     | 3          |
| Dippoldiswalde       | 1          | Kamenz      | 3          |
| Dresden              | 1          | Zittau      | 3          |
| Großenhain           | 1          | Bayreuth    | 4          |
| Meißen               | 1          | Cottbus     | 5          |
| Pirna                | 1          | Elsterwerda | 5          |
| Riesa                | 1          | Hoyerswerda | 5          |
| Sebnitz              | 1          | Lübbenau    | 5          |
| Annaberg-Buchholz    | 2          | Senftenberg | 5          |
| Chemnitz             | 2          | Weiswasser  | 5          |
| Flöha                | 2          | Döbeln      | 6          |
| Freiberg             | 2          | Grimma      | 6          |
| Hohenstein-Ernstthal | 2          | Leipzig     | 6          |
| Johanngeorgenstadt   | 2          | Wurzen      | 6          |
| Olbernhau            | 2          | Gera        | 7          |
| Plauen               | 2          | Jena        | 7          |
| Schneeberg           | 2          | Weimar      | 7          |
| Zwickau              | 2          | Halle       | 8          |
| Bautzen              | 3          | Hof         | 9          |
| Bischofswerda        | 3          | Merseburg   | 10         |

Tabelle 20: Die Clusterzugehörigkeiten der meißnischen Gruppe

|                                  |                     |
|----------------------------------|---------------------|
| Normalisierter Roh-Stress        | .0196               |
| Stress-I                         | .1400 <sup>8</sup>  |
| Stress-II                        | .3031 <sup>9</sup>  |
| S-Stress                         | .0376 <sup>10</sup> |
| Erklärte Streuung (D.A.F.)       | .9804               |
| Kongruenzkoeffizient nach Tucker | .9901               |

Tabelle 21: STRESS- und Anpassungsmaße bei zweidimensionaler Lösung (lausitz. Gr.)

<sup>8</sup> Faktor für optimale Skalierung = 1.020.

<sup>9</sup> Faktor für optimale Skalierung = 1.020.

<sup>10</sup> Faktor für optimale Skalierung = .996.

|                      | Dimension |       |                        | Dimension |       |
|----------------------|-----------|-------|------------------------|-----------|-------|
|                      | 1         | 2     |                        | 1         | 2     |
| Altenberg            | -.333     | -.486 | Jena                   | -.660     | .295  |
| Altenburg            | -.451     | .035  | Johanngeorgenstadt     | -.605     | -.718 |
| Annaberg-Buchholz    | -.289     | -.520 | Kamenz                 | .212      | -.307 |
| Bautzen              | .448      | -.445 | Leipzig                | -.107     | .102  |
| Bischofswerda        | .597      | -.338 | Lübbenau               | 1.144     | .324  |
| Bitterfeld           | -.172     | .322  | Lutherstadt-Wittenberg | .062      | .780  |
| Chemnitz             | -.329     | -.263 | Meißen                 | .164      | -.145 |
| Cottbus              | 1.113     | .348  | Merseburg              | -.323     | .585  |
| Crimmitschau         | -.487     | -.202 | Naumburg               | -.858     | .191  |
| Delitzsch            | -.307     | .232  | Oschatz                | -.083     | -.036 |
| Dessau               | -.070     | .426  | Pirna                  | .033      | -.275 |
| Dippoldiswalde       | .045      | -.504 | Plauen                 | -.658     | -.233 |
| Dresden              | .062      | -.271 | Riesa                  | .169      | .104  |
| Elsterwerda          | .685      | .244  | Schneeberg             | -.402     | -.655 |
| Finsterwalde         | 1.080     | .339  | Sebnitz                | .220      | -.212 |
| Freiberg             | -.222     | -.227 | Seifhennersdorf        | .130      | -.592 |
| Gera                 | -.469     | .610  | Senftenberg            | 1.018     | .328  |
| Görlitz              | .371      | -.526 | Spremberg              | 1.109     | .203  |
| Grimma               | -.445     | .205  | Torgau                 | .070      | .372  |
| Großenhain           | .475      | .108  | Weimar                 | -.743     | .416  |
| Halle                | -.319     | .455  | Weiswasser             | .798      | .094  |
| Hof                  | -1.036    | 1.097 | Zeitz                  | -.587     | .234  |
| Hohenstein-Ernstthal | -.540     | -.467 | Zittau                 | .132      | -.705 |
| Hoyerswerda          | .754      | -.052 | Zwickau                | -.392     | -.265 |

Tabelle 22: Endgültige Koordinaten der gültigen Städte (lausitz. Gr.)

| Stadt                | 7 Cluster | Stadt                  | 7 Cluster |
|----------------------|-----------|------------------------|-----------|
| Altenberg            | 1         | Kamenz                 | 3         |
| Annaberg-Buchholz    | 1         | Seiffennersdorf        | 3         |
| Chemnitz             | 1         | Zittau                 | 3         |
| Crimmitschau         | 1         | Cottbus                | 4         |
| Hohenstein-Ernstthal | 1         | Elsterwerda            | 4         |
| Johanngeorgenstadt   | 1         | Finstervalde           | 4         |
| Plauen               | 1         | Hoyerswerda            | 4         |
| Schneeberg           | 1         | Lübbenau               | 4         |
| Zwickau              | 1         | Senftenberg            | 4         |
| Altenburg            | 2         | Spremberg              | 4         |
| Bitterfeld           | 2         | Weiswasser             | 4         |
| Delitzsch            | 2         | Dippoldiswalde         | 5         |
| Dessau               | 2         | Dresden                | 5         |
| Grimma               | 2         | Freiberg               | 5         |
| Halle                | 2         | Großenhain             | 5         |
| Leipzig              | 2         | Meißen                 | 5         |
| Merseburg            | 2         | Pirna                  | 5         |
| Naumburg             | 2         | Riesa                  | 5         |
| Oschatz              | 2         | Sebnitz                | 5         |
| Torgau               | 2         | Gera                   | 6         |
| Zeitz                | 2         | Hof                    | 6         |
| Bautzen              | 3         | Jena                   | 6         |
| Bischofswerda        | 3         | Weimar                 | 6         |
| Görlitz              | 3         | Lutherstadt-Wittenberg | 7         |

Tabelle 23: Die Clusterzugehörigkeiten der lausitzischen Gruppe

|                                  |                     |
|----------------------------------|---------------------|
| Normalisierter Roh-Stress        | .0199               |
| Stress-I                         | .1410 <sup>11</sup> |
| Stress-II                        | .2139 <sup>12</sup> |
| S-Stress                         | .0137 <sup>13</sup> |
| Erklärte Streuung (D.A.F.)       | .9801               |
| Kongruenzkoeffizient nach Tucker | .9900               |

Tabelle 24: STRESS- und Anpassungsmaße bei zweidimensionaler Lösung (osterl. Gr.)

<sup>11</sup> Faktor für optimale Skalierung = 1.020.

<sup>12</sup> Faktor für optimale Skalierung = 1.020.

<sup>13</sup> Faktor für optimale Skalierung = 1.012.

|                   | Dimension |       |                        | Dimension |       |
|-------------------|-----------|-------|------------------------|-----------|-------|
|                   | 1         | 2     |                        | 1         | 2     |
| Altenburg         | .061      | .175  | Jena                   | .147      | .370  |
| Annaberg-Buchholz | .655      | -.133 | Johanngeorgenstadt     | .493      | -.051 |
| Bad Dübén         | -.544     | .064  | Köthen                 | -.588     | .287  |
| Bautzen           | -.137     | -.346 | Leipzig                | -.390     | -.128 |
| Bayreuth          | 2.676     | -.132 | Lutherstadt-Wittenberg | -.411     | .447  |
| Bitterfeld        | -.524     | .229  | Meißen                 | -.208     | -.179 |
| Chemnitz          | .144      | -.172 | Merseburg              | -.512     | .437  |
| Cottbus           | -.150     | -.715 | Mittweida              | -.508     | -.173 |
| Crimmitschau      | .132      | -.088 | Oschatz                | -.415     | -.185 |
| Delitzsch         | -.388     | .082  | Pirna                  | -.150     | -.059 |
| Dessau            | -.515     | .278  | Plauen                 | .390      | -.011 |
| Döbeln            | -.449     | -.352 | Riesa                  | -.196     | -.081 |
| Dresden           | -.377     | -.318 | Rochlitz               | -.278     | -.245 |
| Flöha             | .210      | -.292 | Schneeberg             | .611      | .019  |
| Freiberg          | .016      | -.273 | Torgau                 | -.382     | .033  |
| Gera              | .093      | .269  | Weimar                 | .150      | .445  |
| Görlitz           | -.061     | -.315 | Wurzen                 | -.334     | -.095 |
| Grimma            | -.339     | -.118 | Zeitz                  | -.109     | .291  |
| Halle             | -.443     | .323  | Zittau                 | .240      | .122  |
| Hof               | 2.121     | .315  | Zwickau                | .329      | -.133 |
| Hoyerswerda       | -.059     | .407  |                        |           |       |

Tabelle 25: Endgültige Koordinaten der gültigen Städte (osterl. Gr.)

| Stadt              | 7 Cluster | Stadt                  | 7 Cluster |
|--------------------|-----------|------------------------|-----------|
| Altenburg          | 1         | Mittweida              | 3         |
| Gera               | 1         | Oschatz                | 3         |
| Jena               | 1         | Pirna                  | 3         |
| Weimar             | 1         | Riesa                  | 3         |
| Zeitz              | 1         | Rochlitz               | 3         |
| Annaberg-Buchholz  | 2         | Torgau                 | 3         |
| Chemnitz           | 2         | Wurzen                 | 3         |
| Crimmitschau       | 2         | Bautzen                | 4         |
| Flöha              | 2         | Cottbus                | 4         |
| Johanngeorgenstadt | 2         | Görlitz                | 4         |
| Plauen             | 2         | Hoyerswerda            | 4         |
| Schneeberg         | 2         | Zittau                 | 4         |
| Zwickau            | 2         | Bayreuth               | 5         |
| Bad Dübén          | 3         | Bitterfeld             | 6         |
| Delitzsch          | 3         | Dessau                 | 6         |
| Döbeln             | 3         | Halle                  | 6         |
| Dresden            | 3         | Köthen                 | 6         |
| Freiberg           | 3         | Lutherstadt-Wittenberg | 6         |
| Grimma             | 3         | Merseburg              | 6         |
| Leipzig            | 3         | Hof                    | 7         |
| Meißen             | 3         |                        |           |

Tabelle 26: Die Clusterzugehörigkeiten der osterländischen Gruppe

|                                  |                      |
|----------------------------------|----------------------|
| Normalisierter Roh-Stress        | .01773               |
| Stress-I                         | .13316 <sup>14</sup> |
| Stress-II                        | .30070 <sup>15</sup> |
| S-Stress                         | .04117 <sup>16</sup> |
| Erklärte Streuung (D.A.F.)       | .98227               |
| Kongruenzkoeffizient nach Tucker | .99109               |

Tabelle 27: STRESS- und Anpassungsmaße bei zweidimensionaler Lösung (vgl.-ergeb. Gr.)

<sup>14</sup> Faktor für optimale Skalierung = 1.018.

<sup>15</sup> Faktor für optimale Skalierung = 1.018.

<sup>16</sup> Faktor für optimale Skalierung = .993.

|                   | Dimension |       |                        | Dimension |       |
|-------------------|-----------|-------|------------------------|-----------|-------|
|                   | 1         | 2     |                        | 1         | 2     |
| Altenberg         | -.332     | .544  | Halle                  | .047      | -.612 |
| Altenburg         | .213      | -.286 | Hof                    | .750      | .727  |
| Annaberg-Buchholz | .031      | .561  | Hohenstein-Ernstthal   | .022      | .047  |
| Auerbach          | .805      | .160  | Hoyerswerda            | -.914     | -.086 |
| Bad Brambach      | .835      | .047  | Jena                   | .783      | -.737 |
| Bad Elster        | .731      | .202  | Johanngeorgenstadt     | .230      | .459  |
| Bamberg           | .689      | .893  | Kamenz                 | -.665     | .183  |
| Bautzen           | -.931     | .403  | Leipzig                | -.182     | -.524 |
| Bayreuth          | .529      | .997  | Lutherstadt-Wittenberg | .283      | -.813 |
| Bitterfeld        | -.063     | -.631 | Markneukirchen         | .614      | .210  |
| Burgstädt         | -.019     | .044  | Meißen                 | -.528     | .006  |
| Chemnitz          | -.161     | -.034 | Mittweida              | -.130     | -.040 |
| Cottbus           | -1.211    | -.233 | Naumburg               | .408      | -.459 |
| Crimmitschau      | .048      | -.106 | Olbernhau              | -.007     | .496  |
| Delitzsch         | -.285     | -.453 | Pirna                  | -.478     | .032  |
| Dessau            | -.164     | -.791 | Plauen                 | .731      | .162  |
| Dippoldiswalde    | -.404     | .376  | Riesa                  | -.453     | -.217 |
| Döbeln            | -.368     | -.353 | Rochlitz               | -.164     | -.161 |
| Dresden           | -.613     | -.037 | Schneeberg             | .126      | .487  |
| Flöha             | -.119     | .063  | Sebnitz                | -.548     | .323  |
| Freiberg          | -.183     | .210  | Treuen                 | .763      | .093  |
| Gera              | .774      | -.407 | Weimar                 | .739      | -.774 |
| Görlitz           | -1.041    | .201  | Zittau                 | -.668     | .403  |
| Greiz             | .604      | -.207 | Zwickau                | .096      | .078  |
| Grimma            | -.218     | -.449 |                        |           |       |

Tabelle 28: Endgültige Koordinaten der gültigen Städte (vgl. -ergeb. Gr.)

| Stadt              | 9 Cluster | Stadt                  | 9 Cluster |
|--------------------|-----------|------------------------|-----------|
| Altenberg          | 1         | Görlitz                | 5         |
| Annaberg-Buchholz  | 1         | Hoyerswerda            | 5         |
| Johanngeorgenstadt | 1         | Kamenz                 | 5         |
| Olbernhau          | 1         | Zittau                 | 5         |
| Schneeberg         | 1         | Burgstädt              | 6         |
| Altenburg          | 2         | Chemnitz               | 6         |
| Bitterfeld         | 2         | Crimmitschau           | 6         |
| Delitzsch          | 2         | Flöha                  | 6         |
| Dessau             | 2         | Freiberg               | 6         |
| Döbeln             | 2         | Hohenstein-Ernstthal   | 6         |
| Grimma             | 2         | Mittweida              | 6         |
| Halle              | 2         | Rochlitz               | 6         |
| Leipzig            | 2         | Zwickau                | 6         |
| Auerbach           | 3         | Dippoldiswalde         | 7         |
| Bad Brambach       | 3         | Dresden                | 7         |
| Bad Elster         | 3         | Meißen                 | 7         |
| Greiz              | 3         | Pirna                  | 7         |
| Markneukirchen     | 3         | Riesa                  | 7         |
| Plauen             | 3         | Sebnitz                | 7         |
| Treuen             | 3         | Gera                   | 8         |
| Bamberg            | 4         | Weimar                 | 8         |
| Bayreuth           | 4         | Jena                   | 9         |
| Hof                | 4         | Lutherstadt-Wittenberg | 9         |
| Bautzen            | 5         | Naumburg               | 9         |
| Cottbus            | 5         |                        |           |

Tabelle 29: Die Clusterzugehörigkeiten der vogtl.-ergeb. Gruppe

|                                  |                     |
|----------------------------------|---------------------|
| Normalisierter Roh-Stress        | .0128               |
| Stress-I                         | .1131 <sup>17</sup> |
| Stress-II                        | .2430 <sup>18</sup> |
| S-Stress                         | .0157 <sup>19</sup> |
| Erklärte Streuung (D.A.F.)       | .9872               |
| Kongruenzkoeffizient nach Tucker | .9936               |

Tabelle 30: STRESS- und Anpassungsmaße bei zweidimensionaler Lösung (thur. Gr.)

<sup>17</sup> Faktor für optimale Skalierung = 1.013.

<sup>18</sup> Faktor für optimale Skalierung = 1.013.

<sup>19</sup> Faktor für optimale Skalierung = 1.003.

|                   | Dimension |       |                            | Dimension |       |
|-------------------|-----------|-------|----------------------------|-----------|-------|
|                   | 1         | 2     |                            | 1         | 2     |
| Altenburg         | .051      | .645  | Hohenstein-Ernstthal       | .430      | -.053 |
| Annaberg-Buchholz | .649      | -.390 | Hoyerswerda                | -.379     | -.738 |
| Bad Brambach      | .772      | .009  | Jena                       | -.068     | .848  |
| Bamberg           | 1.446     | -.109 | Köthen                     | -.574     | .205  |
| Bautzen           | -.313     | -.578 | Leipzig                    | -.315     | -.171 |
| Bayreuth          | 1.463     | .104  | Lutherstadt-<br>Wittenberg | -.807     | .365  |
| Bischofswerda     | -.251     | -.872 | Meißen                     | -.079     | -.286 |
| Bitterfeld        | -.582     | -.036 | Merseburg                  | -.728     | .174  |
| Chemnitz          | .112      | -.188 | Naumburg                   | -.410     | .578  |
| Cottbus           | -.515     | -.632 | Pirna                      | .092      | -.358 |
| Crimmitschau      | .082      | -.034 | Plauen                     | .420      | .148  |
| Delitzsch         | -.354     | -.224 | Pössa                      | -.178     | .776  |
| Dessau            | -.647     | -.036 | Riesa                      | -.202     | -.022 |
| Dresden           | -.082     | -.407 | Schleiz                    | .202      | .451  |
| Freiberg          | .293      | -.260 | Schneeberg                 | .534      | -.599 |
| Gera              | .086      | .713  | Torgau                     | -.541     | -.162 |
| Görlitz           | -.196     | -.392 | Weimar                     | -.088     | .773  |
| Greiz             | .075      | .529  | Zeitz                      | -.293     | .393  |
| Grimma            | -.106     | -.126 | Zittau                     | .119      | -.507 |
| Halle             | -.611     | .278  | Zwickau                    | .216      | -.149 |
| Hof               | 1.279     | .341  |                            |           |       |

Tabelle 31: Endgültige Koordinaten der gültigen Städte (thür. Gr.)



| Stadt                | 5 Cluster | Stadt                  | 5 Cluster |
|----------------------|-----------|------------------------|-----------|
| Altenburg            | 1         | Bischofswerda          | 4         |
| Gera                 | 1         | Cottbus                | 4         |
| Greiz                | 1         | Delitzsch              | 4         |
| Jena                 | 1         | Dresden                | 4         |
| Naumburg             | 1         | Freiberg               | 4         |
| Pössa                | 1         | Görlitz                | 4         |
| Schleiz              | 1         | Grimma                 | 4         |
| Weimar               | 1         | Hoyerswerda            | 4         |
| Zeitz                | 1         | Leipzig                | 4         |
| Annaberg-Buchholz    | 2         | Meißen                 | 4         |
| Chemnitz             | 2         | Pirna                  | 4         |
| Crimmitschau         | 2         | Riesa                  | 4         |
| Hohenstein-Ernstthal | 2         | Torgau                 | 4         |
| Plauen               | 2         | Zittau                 | 4         |
| Schneeberg           | 2         | Bitterfeld             | 5         |
| Zwickau              | 2         | Dessau                 | 5         |
| Bad Brambach         | 3         | Halle                  | 5         |
| Bamberg              | 3         | Köthen                 | 5         |
| Bayreuth             | 3         | Lutherstadt-Wittenberg | 5         |
| Hof                  | 3         | Merseburg              | 5         |
| Bautzen              | 4         |                        |           |

Tabelle 32: Die Clusterzugehörigkeiten der thüringischen Gruppe

|                                  |                      |
|----------------------------------|----------------------|
| Normalisierter Roh-Stress        | .00897               |
| Stress-I                         | .09472 <sup>20</sup> |
| Stress-II                        | .19411 <sup>21</sup> |
| S-Stress                         | .01636 <sup>22</sup> |
| Erklärte Streuung (D.A.F.)       | .99103               |
| Kongruenzkoeffizient nach Tucker | .99550               |

Tabelle 33: STRESS- und Anpassungsmaße bei zweidimensionaler Lösung (Nordgr.)

<sup>20</sup> Faktor für optimale Skalierung = 1.009.

<sup>21</sup> Faktor für optimale Skalierung = 1.009.

<sup>22</sup> Faktor für optimale Skalierung = .999.

|                   | Dimension |       |                            | Dimension |       |
|-------------------|-----------|-------|----------------------------|-----------|-------|
|                   | 1         | 2     |                            | 1         | 2     |
| Annaberg-Buchholz | .682      | .070  | Hoyerswerda                | -.095     | -.677 |
| Bad Dübén         | -.447     | .057  | Jena                       | .588      | .688  |
| Bad Dürrenberg    | -.674     | .363  | Köthen                     | -.857     | .108  |
| Bautzen           | .422      | -.520 | Leipzig                    | -.004     | -.129 |
| Bayreuth          | 1.280     | .821  | Lutherstadt-<br>Wittenberg | -.824     | .007  |
| Bernburg          | -.806     | .136  | Meißen                     | .226      | -.238 |
| Bitterfeld        | -.773     | .076  | Merseburg                  | -.828     | .235  |
| Chemnitz          | .444      | -.175 | Naumburg                   | -.656     | .437  |
| Cottbus           | .214      | -.953 | Oschatz                    | .058      | .021  |
| Delitzsch         | -.420     | -.033 | Pirna                      | .160      | -.288 |
| Dessau            | -.827     | .145  | Plauen                     | .573      | -.266 |
| Döbeln            | -.177     | -.187 | Querfurt                   | -.737     | .336  |
| Dresden           | .228      | -.351 | Riesa                      | .122      | -.071 |
| Elsterwerda       | -.219     | -.569 | Schneeberg                 | .750      | .029  |
| Freiberg          | .339      | -.182 | Torgau                     | -.277     | -.171 |
| Gera              | .493      | .535  | Weimar                     | .587      | .685  |
| Görlitz           | .253      | -.594 | Wurzen                     | .034      | .037  |
| Grimma            | .096      | -.175 | Zeitz                      | -.392     | .346  |
| Halle             | -.821     | .204  | Zittau                     | .491      | -.047 |
| Hof               | 1.378     | .191  | Zwickau                    | .417      | .098  |

Tabelle 34: Endgültige Koordinaten der gültigen Städte (Nordgr.)

| Stadt             | 7 Cluster | Stadt                  | 7 Cluster |
|-------------------|-----------|------------------------|-----------|
| Annaberg-Buchholz | 1         | Bitterfeld             | 2         |
| Bautzen           | 1         | Dessau                 | 2         |
| Chemnitz          | 1         | Halle                  | 2         |
| Döbeln            | 1         | Köthen                 | 2         |
| Dresden           | 1         | Lutherstadt-Wittenberg | 2         |
| Freiberg          | 1         | Merseburg              | 2         |
| Grimma            | 1         | Naumburg               | 2         |
| Leipzig           | 1         | Querfurt               | 2         |
| Meißen            | 1         | Zeitz                  | 2         |
| Oschatz           | 1         | Bayreuth               | 3         |
| Pirna             | 1         | Cottbus                | 4         |
| Plauen            | 1         | Elsterwerda            | 4         |
| Riesa             | 1         | Görlitz                | 4         |
| Schneeberg        | 1         | Hoyerswerda            | 4         |
| Wurzen            | 1         | Delitzsch              | 5         |
| Zittau            | 1         | Torgau                 | 5         |
| Zwickau           | 1         | Gera                   | 6         |
| Bad Dübén         | 2         | Jena                   | 6         |
| Bad Dürrenberg    | 2         | Weimar                 | 6         |
| Bernburg          | 2         | Hof                    | 7         |

Tabelle 35: Die Clusterzugehörigkeiten der Nordgruppe

| Wo wird Ihrer Meinung nach typisches Sächsisch gesprochen? | Häufigkeit | Prozent | Gültige Prozente | Kumulierte Prozente |
|------------------------------------------------------------|------------|---------|------------------|---------------------|
| Dresden                                                    | 26         | 28.0    | 28.0             | 28.0                |
| Leipzig                                                    | 15         | 16.1    | 16.1             | 44.1                |
| Dresden, Leipzig                                           | 12         | 12.9    | 12.9             | 57.0                |
| keine Angabe                                               | 7          | 7.5     | 7.5              | 64.5                |
| Chemnitz                                                   | 5          | 5.4     | 5.4              | 69.9                |
| Sachsen                                                    | 4          | 4.3     | 4.3              | 74.2                |
| Dresden, Leipzig, Dörfer                                   | 3          | 3.2     | 3.2              | 77.4                |
| Dörfer                                                     | 3          | 3.2     | 3.2              | 80.6                |
| Leipzig, Chemnitz                                          | 2          | 2.2     | 2.2              | 82.8                |
| Erzgebirge                                                 | 2          | 2.2     | 2.2              | 84.9                |
| alles Mutationen                                           | 1          | 1.1     | 1.1              | 86.0                |
| Dresden, Leipzig, Vogtland                                 | 1          | 1.1     | 1.1              | 87.1                |
| Leipzig, Erzgebirge                                        | 1          | 1.1     | 1.1              | 88.2                |
| Dresden-Prohlis                                            | 1          | 1.1     | 1.1              | 89.2                |
| Dresden, Radebeul                                          | 1          | 1.1     | 1.1              | 90.3                |
| Sachsen, Sachsen-Anhalt                                    | 1          | 1.1     | 1.1              | 91.4                |
| Dresden, Zwickau                                           | 1          | 1.1     | 1.1              | 92.5                |
| Leipzig, Muldentäl                                         | 1          | 1.1     | 1.1              | 93.5                |
| Chemnitz, Dresden, Pirna, Coswig, Leipzig, Zwickau         | 1          | 1.1     | 1.1              | 94.6                |
| Dresden, Leipzig, Dresden                                  | 1          | 1.1     | 1.1              | 95.7                |
| Zwickau, Chemnitz, Borna                                   | 1          | 1.1     | 1.1              | 96.8                |
| auf den Dörfern im Muldentäl und Strigistal                | 1          | 1.1     | 1.1              | 97.8                |
| Dresden, Chemnitz                                          | 1          | 1.1     | 1.1              | 98.9                |
| Grimma                                                     | 1          | 1.1     | 1.1              | 100.0               |
| Gesamt                                                     | 93         | 100.0   | 100.0            |                     |

Tabelle 36: Städte, wo nach Meinung aller Befragten „typisches“ Sächsisch gesprochen wird

| Wo wird Ihrer Meinung nach typisches Sächsisch gesprochen? | Erhebungsregion |                  |           |              |             |          | Σ  |
|------------------------------------------------------------|-----------------|------------------|-----------|--------------|-------------|----------|----|
|                                                            | Thür. Gr.       | Vogtl.-Erzg. Gr. | Meiß. Gr. | Lausitz. Gr. | Osterl. Gr. | Nord-Gr. |    |
| alles Mutationen                                           | 0               | 1                | 0         | 0            | 0           | 0        | 1  |
| auf den Dörfern im Muldental und Strigistal                | 0               | 0                | 0         | 0            | 1           | 0        | 1  |
| Chemnitz                                                   | 1               | 0                | 0         | 1            | 1           | 2        | 5  |
| Chemnitz, Dresden, Pirna, Coswig, Leipzig, Zwickau         | 0               | 1                | 0         | 0            | 0           | 0        | 1  |
| Dörfer                                                     | 0               | 0                | 1         | 0            | 1           | 1        | 3  |
| Dresden                                                    | 5               | 4                | 4         | 4            | 3           | 6        | 26 |
| Dresden, Chemnitz                                          | 0               | 1                | 0         | 0            | 0           | 0        | 1  |
| Dresden, Leipzig                                           | 4               | 1                | 0         | 5            | 1           | 1        | 12 |
| Dresden, Leipzig, Dörfer                                   | 0               | 0                | 1         | 0            | 2           | 0        | 3  |
| Dresden, Leipzig, Dresden                                  | 0               | 0                | 0         | 1            | 0           | 0        | 1  |
| Dresden, Leipzig, Vogtland                                 | 0               | 0                | 0         | 0            | 1           | 0        | 1  |
| Dresden, Radebeul                                          | 0               | 0                | 0         | 1            | 0           | 0        | 1  |
| Dresden, Zwickau                                           | 0               | 0                | 0         | 0            | 1           | 0        | 1  |
| Dresden-Prohlis                                            | 0               | 0                | 0         | 0            | 0           | 1        | 1  |
| Erzgebirge                                                 | 0               | 0                | 1         | 0            | 1           | 0        | 2  |
| Grimma                                                     | 0               | 0                | 0         | 0            | 0           | 1        | 1  |
| keine Angabe                                               | 2               | 2                | 0         | 0            | 2           | 1        | 7  |
| Leipzig                                                    | 3               | 3                | 1         | 1            | 3           | 4        | 15 |
| Leipzig, Chemnitz                                          | 1               | 0                | 1         | 0            | 0           | 0        | 2  |
| Leipzig, Erzgebirge                                        | 0               | 0                | 1         | 0            | 0           | 0        | 1  |
| Leipzig, Muldental                                         | 0               | 0                | 1         | 0            | 0           | 0        | 1  |
| Sachsen                                                    | 2               | 1                | 0         | 0            | 1           | 0        | 4  |
| Sachsen, Sachsen-Anhalt                                    | 0               | 0                | 0         | 0            | 0           | 1        | 1  |
| Zwickau, Chemnitz, Borna                                   | 0               | 0                | 0         | 0            | 0           | 1        | 1  |
| Gesamt                                                     | 18              | 14               | 11        | 13           | 18          | 19       | 93 |

Tabelle 37: Städte, wo nach Meinung der Befragten „typisches“ Sächsisch gesprochen wird (sortiert nach Gruppen)

| Stadt                | Σ  | Cluster | Ausprägung <i>Obersächsisch</i> |      |      |      |       | Ausprägung <i>Gefallen</i> |      |      |      |     |            |                 | Ausprägung <i>Dialektalität</i> |    |    |   |   |            |       |
|----------------------|----|---------|---------------------------------|------|------|------|-------|----------------------------|------|------|------|-----|------------|-----------------|---------------------------------|----|----|---|---|------------|-------|
|                      |    |         | 1                               | 2    | 3    | 4    | Modus | 1                          | 2    | 3    | 4    | 5   | Mittelwert | Modus           | 1                               | 2  | 3  | 4 | 5 | Mittelwert | Modus |
| Altenberg            | 26 | 1       | 3                               | 5    | 10   | 8    | 3     | 4                          | 9    | 7    | 6    | 0   | 2.58       | 2               | 7                               | 9  | 7  | 3 | 0 | 2.23       | 2     |
|                      |    | in %    | 11.5                            | 19.2 | 38.5 | 30.8 |       | 15.4                       | 34.6 | 27   | 23   | 0   |            |                 |                                 |    |    |   |   |            |       |
| Dippoldiswalde       | 28 | 1       | 3                               | 7    | 11   | 7    | 3     | 4                          | 9    | 8    | 7    | 0   | 2.64       | 2               | 6                               | 9  | 10 | 3 | 0 | 2.36       | 3     |
|                      |    | in %    | 10.7                            | 25   | 39.3 | 25   |       | 14.3                       | 32.1 | 28.6 | 25   | 0   |            |                 |                                 |    |    |   |   |            |       |
| Dresden              | 30 | 1       | 0                               | 4    | 17   | 9    | 3     | 4                          | 12   | 7    | 7    | 0   | 2.56       | 2               | 5                               | 13 | 10 | 2 | 0 | 2.30       | 2     |
|                      |    | in %    | 0                               | 13.3 | 56.7 | 30   |       | 13.3                       | 40   | 23.3 | 23.3 | 0   |            |                 |                                 |    |    |   |   |            |       |
| Großenhain           | 29 | 1       | 2                               | 6    | 13   | 8    | 3     | 1                          | 12   | 12   | 4    | 0   | 2.65       | * <sup>23</sup> | 4                               | 8  | 13 | 4 | 0 | 2.48       | 3     |
|                      |    | in %    | 6.9                             | 20.7 | 44.8 | 27.6 |       | 3.4                        | 41.4 | 41.4 | 13.8 | 0   |            |                 |                                 |    |    |   |   |            |       |
| Meißen               | 29 | 1       | 0                               | 4    | 16   | 9    | 3     | 4                          | 9    | 9    | 7    | 0   | 2.65       | *               | 6                               | 13 | 8  | 2 | 0 | 2.21       | 2     |
|                      |    | in %    | 0                               | 13.8 | 55.2 | 31   |       | 13.8                       | 31   | 31   | 24.2 | 0   |            |                 |                                 |    |    |   |   |            |       |
| Pirna                | 28 | 1       | 1                               | 6    | 14   | 7    | 3     | 4                          | 12   | 6    | 6    | 0   | 2.50       | 2               | 5                               | 11 | 9  | 3 | 0 | 2.36       | 2     |
|                      |    | in %    | 3.6                             | 21.4 | 50   | 25   |       | 14.3                       | 42.9 | 21.4 | 21.4 | 0   |            |                 |                                 |    |    |   |   |            |       |
| Riesa                | 30 | 1       | 0                               | 3    | 17   | 10   | 3     | 2                          | 8    | 10   | 10   | 0   | 2.93       | *               | 8                               | 10 | 10 | 2 | 0 | 2.20       | *     |
|                      |    | in %    | 0                               | 10   | 56.7 | 33.3 |       | 6.7                        | 26.7 | 33.3 | 33.3 | 0   |            |                 |                                 |    |    |   |   |            |       |
| Sebnitz              | 27 | 1       | 1                               | 5    | 16   | 5    | 3     | 3                          | 13   | 6    | 5    | 0   | 2.48       | 2               | 6                               | 10 | 9  | 2 | 0 | 2.26       | 2     |
|                      |    | in %    | 3.7                             | 18.5 | 59.3 | 18.5 |       | 11.1                       | 48.2 | 22.2 | 18.5 | 0   |            |                 |                                 |    |    |   |   |            |       |
| Annaberg-Buchholz    | 29 | 2       | 4                               | 5    | 11   | 9    | 3     | 1                          | 15   | 10   | 2    | 1   | 2.55       | 2               | 18                              | 4  | 5  | 2 | 0 | 1.69       | 1     |
|                      |    | in %    | 13.8                            | 17.3 | 37.9 | 31   |       | 3.5                        | 51.7 | 34.5 | 6.9  | 3.5 |            |                 |                                 |    |    |   |   |            |       |
| Chemnitz             | 30 | 2       | 2                               | 3    | 9    | 16   | 4     | 2                          | 12   | 8    | 7    | 1   | 2.76       | 2               | 11                              | 14 | 4  | 1 | 0 | 1.83       | 2     |
|                      |    | in %    | 6.7                             | 10   | 30   | 53.3 |       | 6.7                        | 40   | 26.7 | 23.3 | 3.3 |            |                 |                                 |    |    |   |   |            |       |
| Flöha                | 23 | 2       | 2                               | 2    | 10   | 9    | 3     | 1                          | 9    | 9    | 3    | 1   | 2.74       | *               | 10                              | 9  | 4  | 0 | 0 | 1.74       | 1     |
|                      |    | in %    | 8.7                             | 8.7  | 43.5 | 39.1 |       | 4.3                        | 39.1 | 39.1 | 13   | 4.3 |            |                 |                                 |    |    |   |   |            |       |
| Freiberg             | 28 | 2       | 2                               | 4    | 11   | 11   | *     | 3                          | 7    | 12   | 4    | 2   | 2.82       | 3               | 8                               | 12 | 6  | 2 | 0 | 2.07       | 2     |
|                      |    | in %    | 7.1                             | 14.3 | 39.3 | 39.3 |       | 10.7                       | 25   | 42.9 | 14.3 | 7.1 |            |                 |                                 |    |    |   |   |            |       |
| Hohenstein-Ernstthal | 24 | 2       | 1                               | 3    | 12   | 8    | 3     | 2                          | 12   | 8    | 1    | 1   | 2.46       | 2               | 7                               | 12 | 4  | 1 | 0 | 1.96       | 2     |

<sup>23</sup> Weisen mehrere Werte dieselbe maximale Auftretenshäufigkeit auf, so wird in Folge der kleinste Wert angezeigt. In diesen Fällen wird zur Differenzierung der kleinste Wert mit einem \* versehen.

|                    |      |      |      |      |      |    |      |      |      |      |     |   |      |   |    |    |    |    |   |      |   |  |
|--------------------|------|------|------|------|------|----|------|------|------|------|-----|---|------|---|----|----|----|----|---|------|---|--|
|                    | in % | 4.2  | 12.5 | 50   | 33.3 |    | 8.3  | 50   | 33.3 | 4.2  | 4.2 |   |      |   |    |    |    |    |   |      |   |  |
| Johanngeorgenstadt | 25   | 2    | 4    | 4    | 11   | 6  | 3    | 2    | 13   | 5    | 3   | 2 | 2.60 | 2 | 14 | 4  | 5  | 2  | 0 | 1.80 | 1 |  |
|                    | in % | 16   | 16   | 44   | 24   |    | 8    | 52   | 20   | 12   | 8   |   |      |   |    |    |    |    |   |      |   |  |
| Olbernhau          | 24   | 2    | 4    | 3    | 8    | 9  | 4    | 2    | 14   | 5    | 2   | 1 | 2.42 | 2 | 13 | 5  | 5  | 1  | 0 | 1.75 | 1 |  |
|                    | in % | 16.7 | 12.5 | 33.3 | 37.5 |    | 8.3  | 58.3 | 20.8 | 8.3  | 4.2 |   |      |   |    |    |    |    |   |      |   |  |
| Plauen             | 26   | 2    | 4    | 7    | 10   | 5  | 3    | 1    | 13   | 8    | 3   | 1 | 2.61 | 2 | 7  | 11 | 4  | 4  | 0 | 2.19 | 2 |  |
|                    | in % | 15.4 | 26.9 | 38.5 | 19.2 |    | 3.9  | 50   | 30.8 | 11.5 | 3.9 |   |      |   |    |    |    |    |   |      |   |  |
| Schneeberg         | 26   | 2    | 3    | 4    | 8    | 11 | 4    | 4    | 10   | 9    | 2   | 1 | 2.46 | 2 | 14 | 6  | 4  | 2  | 0 | 1.77 | 1 |  |
|                    | in % | 11.5 | 15.4 | 30.8 | 42.3 |    | 15.4 | 38.5 | 34.6 | 7.7  | 3.8 |   |      |   |    |    |    |    |   |      |   |  |
| Zwickau            | 25   | 2    | 2    | 4    | 11   | 8  | 3    | 2    | 13   | 8    | 2   | 0 | 2.40 | 2 | 9  | 6  | 8  | 2  | 0 | 2.12 | 1 |  |
|                    | in % | 8    | 16   | 44   | 32   |    | 8    | 52   | 32   | 8    | 0   |   |      |   |    |    |    |    |   |      |   |  |
| Bautzen            | 29   | 3    | 5    | 7    | 13   | 4  | 3    | 3    | 16   | 8    | 2   | 0 | 2.31 | 2 | 4  | 12 | 10 | 3  | 0 | 2.41 | 2 |  |
|                    | in % | 17.3 | 24.1 | 44.8 | 13.8 |    | 10.3 | 55.2 | 27.6 | 6.9  | 0   |   |      |   |    |    |    |    |   |      |   |  |
| Bischofswerda      | 24   | 3    | 3    | 7    | 11   | 3  | 3    | 3    | 11   | 9    | 1   | 0 | 2.33 | 2 | 3  | 8  | 12 | 1  | 0 | 2.46 | 3 |  |
|                    | in % | 12.5 | 29.2 | 45.8 | 12.5 |    | 12.5 | 45.8 | 37.5 | 4.2  | 0   |   |      |   |    |    |    |    |   |      |   |  |
| Görlitz            | 25   | 3    | 5    | 7    | 9    | 4  | 3    | 2    | 11   | 9    | 3   | 0 | 2.52 | 2 | 4  | 10 | 8  | 3  | 0 | 2.40 | 2 |  |
|                    | in % | 20   | 28   | 36   | 16   |    | 8    | 44   | 36   | 12   | 0   |   |      |   |    |    |    |    |   |      |   |  |
| Kamenz             | 27   | 3    | 2    | 8    | 12   | 5  | 3    | 3    | 13   | 9    | 2   | 0 | 2.37 | 2 | 2  | 12 | 11 | 2  | 0 | 2.48 | 2 |  |
|                    | in % | 7.4  | 29.6 | 44.4 | 18.5 |    | 11.1 | 48.2 | 33.3 | 7.4  | 0   |   |      |   |    |    |    |    |   |      |   |  |
| Zittau             | 29   | 3    | 4    | 9    | 10   | 6  | 3    | 3    | 19   | 5    | 2   | 0 | 2.21 | 2 | 8  | 12 | 6  | 3  | 0 | 2.14 | 2 |  |
|                    | in % | 13.8 | 31   | 34.5 | 20.7 |    | 10.4 | 65.5 | 17.2 | 6.9  | 0   |   |      |   |    |    |    |    |   |      |   |  |
| Bayreuth           | 23   | 4    | 20   | 2    | 1    | 0  | 1    | 2    | 12   | 5    | 2   | 2 | 2.56 | 2 | 5  | 3  | 7  | 6  | 2 | 2.87 | 3 |  |
|                    | in % | 87   | 8.7  | 4.3  | 0    |    | 8.7  | 52.2 | 21.7 | 8.7  | 8.7 |   |      |   |    |    |    |    |   |      |   |  |
| Cottbus            | 26   | 5    | 14   | 10   | 1    | 1  | 1    | 3    | 15   | 6    | 2   | 0 | 2.27 | 2 | 0  | 4  | 9  | 12 | 1 | 3.38 | 4 |  |
|                    | in % | 53.8 | 38.5 | 3.9  | 3.9  |    | 11.5 | 57.7 | 23.1 | 7.7  | 0   |   |      |   |    |    |    |    |   |      |   |  |
| Elsterwerda        | 22   | 5    | 8    | 8    | 5    | 1  | *    | 4    | 10   | 6    | 2   | 0 | 2.27 | 2 | 1  | 2  | 9  | 9  | 1 | 3.32 | * |  |
|                    | in % | 36.4 | 36.4 | 22.7 | 4.5  |    | 18.2 | 45.4 | 27.3 | 9.1  | 0   |   |      |   |    |    |    |    |   |      |   |  |
| Hoyerswerda        | 27   | 5    | 9    | 9    | 7    | 2  | *    | 2    | 11   | 11   | 2   | 1 | 2.59 | 2 | 0  | 7  | 12 | 8  | 0 | 3.04 | 3 |  |
|                    | in % | 33.3 | 33.3 | 25.9 | 7.4  |    | 7.4  | 40.8 | 40.8 | 7.4  | 3.7 |   |      |   |    |    |    |    |   |      |   |  |
| Lübbenau           | 25   | 5    | 13   | 10   | 1    | 1  | 1    | 3    | 12   | 9    | 1   | 0 | 2.32 | 2 | 0  | 4  | 9  | 10 | 2 | 3.40 | 4 |  |

|             |      |    |      |      |      |      |    |      |      |      |      |     |      |   |    |    |    |    |   |      |   |  |
|-------------|------|----|------|------|------|------|----|------|------|------|------|-----|------|---|----|----|----|----|---|------|---|--|
|             | in % | 52 | 40   | 4    | 4    |      | 12 | 48   | 36   | 4    | 0    |     |      |   |    |    |    |    |   |      |   |  |
| Senftenberg | 25   | 5  | 11   | 9    | 3    | 2    | 1  | 4    | 12   | 6    | 2    | 1   | 2.36 | 2 | 1  | 5  | 8  | 11 | 0 | 3.16 | 4 |  |
|             | in % |    | 44   | 36   | 12   | 8    |    | 16   | 48   | 24   | 8    | 4   |      |   |    |    |    |    |   |      |   |  |
| Weisswasser | 23   | 5  | 11   | 8    | 3    | 1    | 1  | 3    | 8    | 9    | 2    | 1   | 2.56 | 3 | 0  | 6  | 9  | 7  | 1 | 3.13 | 3 |  |
|             | in % |    | 47.8 | 34.8 | 13   | 4.4  |    | 13   | 34.8 | 39.1 | 8.7  | 4.4 |      |   |    |    |    |    |   |      |   |  |
| Döbeln      | 25   | 6  | 3    | 1    | 11   | 10   | 3  | 2    | 11   | 3    | 8    | 1   | 2.80 | 2 | 11 | 9  | 3  | 1  | 1 | 1.88 | 1 |  |
|             | in % |    | 12   | 4    | 44   | 40   |    | 8    | 44   | 12   | 32   | 4   |      |   |    |    |    |    |   |      |   |  |
| Grimma      | 25   | 6  | 0    | 2    | 12   | 11   | 3  | 0    | 8    | 9    | 7    | 1   | 3.04 | 3 | 10 | 10 | 4  | 1  | 0 | 1.84 | * |  |
|             | in % |    | 0    | 8    | 48   | 44   |    | 0    | 32   | 36   | 28   | 4   |      |   |    |    |    |    |   |      |   |  |
| Leipzig     | 29   | 6  | 3    | 2    | 11   | 13   | 4  | 1    | 9    | 10   | 7    | 2   | 3.00 | 3 | 10 | 10 | 5  | 3  | 1 | 2.14 | * |  |
|             | in % |    | 10.3 | 6.9  | 37.9 | 44.8 |    | 3.5  | 31   | 34.5 | 24.1 | 6.9 |      |   |    |    |    |    |   |      |   |  |
| Wurzen      | 28   | 6  | 4    | 3    | 13   | 8    | 3  | 0    | 13   | 10   | 3    | 2   | 2.79 | 2 | 8  | 9  | 7  | 3  | 1 | 2.29 | 2 |  |
|             | in % |    | 14.3 | 10.7 | 46.4 | 28.6 |    | 0    | 46.4 | 35.7 | 10.7 | 7.2 |      |   |    |    |    |    |   |      |   |  |
| Gera        | 23   | 7  | 8    | 8    | 6    | 1    | *  | 2    | 12   | 7    | 2    | 0   | 2.39 | 2 | 0  | 7  | 12 | 4  | 0 | 2.87 | 3 |  |
|             | in % |    | 34.8 | 34.8 | 26.1 | 4.3  |    | 8.7  | 52.2 | 30.4 | 8.7  | 0   |      |   |    |    |    |    |   |      |   |  |
| Jena        | 25   | 7  | 9    | 10   | 5    | 1    | 2  | 2    | 13   | 8    | 2    | 0   | 2.40 | 2 | 0  | 7  | 12 | 6  | 0 | 2.96 | 3 |  |
|             | in % |    | 36   | 40   | 20   | 4    |    | 8    | 52   | 32   | 8    | 0   |      |   |    |    |    |    |   |      |   |  |
| Weimar      | 23   | 7  | 13   | 7    | 3    | 0    | 1  | 3    | 13   | 7    | 0    | 0   | 2.43 | 2 | 0  | 5  | 9  | 9  | 0 | 3.17 | * |  |
|             | in % |    | 56.5 | 30.4 | 13.1 | 0    |    | 13.1 | 56.5 | 30.4 | 0    | 0   |      |   |    |    |    |    |   |      |   |  |
| Halle       | 24   | 8  | 9    | 5    | 7    | 3    | 1  | 2    | 11   | 6    | 5    | 0   | 2.58 | 2 | 3  | 5  | 8  | 7  | 1 | 2.92 | 3 |  |
|             | in % |    | 37.5 | 20.8 | 29.2 | 12.5 |    | 8.3  | 45.8 | 25   | 20.8 | 0   |      |   |    |    |    |    |   |      |   |  |
| Hof         | 22   | 9  | 18   | 1    | 0    | 3    | 1  | 2    | 13   | 5    | 1    | 1   | 2.36 | 2 | 3  | 5  | 6  | 7  | 1 | 2.91 | 4 |  |
|             | in % |    | 81.8 | 4.6  | 0    | 13.6 |    | 9.1  | 59.1 | 22.7 | 4.6  | 4.6 |      |   |    |    |    |    |   |      |   |  |
| Merseburg   | 22   | 10 | 9    | 7    | 3    | 3    | 1  | 2    | 10   | 4    | 6    | 0   | 2.63 | 2 | 3  | 4  | 7  | 7  | 1 | 2.95 | * |  |
|             | in % |    | 40.9 | 31.8 | 13.6 | 13.6 |    | 9.1  | 45.4 | 18.2 | 27.3 | 0   |      |   |    |    |    |    |   |      |   |  |

Tabelle 38: *Obersächsische Ausprägung, Gefallen und Korrektheit* der gültigen Städte der meißnischen Gruppe



| Stadt                | Σ  | Cluster | Ausprägung <i>Obersächsisch</i> |      |      |      |       | Ausprägung <i>Gefallen</i> |      |      |      |      |            |       | Ausprägung <i>Dialektalität</i> |   |    |   |   |            |       |
|----------------------|----|---------|---------------------------------|------|------|------|-------|----------------------------|------|------|------|------|------------|-------|---------------------------------|---|----|---|---|------------|-------|
|                      |    |         | 1                               | 2    | 3    | 4    | Modus | 1                          | 2    | 3    | 4    | 5    | Mittelwert | Modus | 1                               | 2 | 3  | 4 | 5 | Mittelwert | Modus |
| Altenberg            | 24 | 1       | 8                               | 1    | 9    | 6    | 3     | 4                          | 10   | 6    | 3    | 1    | 2.46       | 2     | 13                              | 6 | 5  | 0 | 0 | 1.66       | 1     |
|                      |    | in %    | 33.3                            | 4.2  | 37.5 | 25   |       | 16.6                       | 41.7 | 25   | 12.5 | 4.2  |            |       |                                 |   |    |   |   |            |       |
| Annaberg-Buchholz    | 30 | 1       | 9                               | 5    | 9    | 7    | *     | 5                          | 12   | 6    | 5    | 2    | 2.56       | 2     | 12                              | 9 | 8  | 0 | 1 | 1.97       | 1     |
|                      |    | in %    | 30                              | 16.7 | 30   | 23.3 |       | 16.7                       | 40   | 20   | 16.7 | 6.7  |            |       |                                 |   |    |   |   |            |       |
| Chemnitz             | 29 | 1       | 2                               | 3    | 11   | 13   | 4     | 3                          | 8    | 6    | 9    | 3    | 3.03       | 4     | 13                              | 9 | 7  | 0 | 0 | 1.79       | 1     |
|                      |    | in %    | 6.9                             | 10.3 | 37.9 | 44.8 |       | 10.3                       | 27.6 | 20.7 | 31   | 10.3 |            |       |                                 |   |    |   |   |            |       |
| Crimmitschau         | 24 | 1       | 3                               | 3    | 10   | 8    | 3     | 2                          | 8    | 6    | 7    | 1    | 2.86       | 2     | 8                               | 6 | 10 | 0 | 0 | 2.08       | 3     |
|                      |    | in %    | 12.5                            | 12.5 | 41.7 | 33.3 |       | 8.3                        | 33.3 | 25   | 29.2 | 4.2  |            |       |                                 |   |    |   |   |            |       |
| Hohenstein-Ernstthal | 23 | 1       | 3                               | 3    | 10   | 7    | 3     | 2                          | 8    | 5    | 7    | 1    | 2.87       | 2     | 4                               | 7 | 11 | 1 | 0 | 2.39       | 3     |
|                      |    | in %    | 13                              | 13   | 43.5 | 30.4 |       | 8.7                        | 34.8 | 21.7 | 30.4 | 4.3  |            |       |                                 |   |    |   |   |            |       |
| Johann-georgenstadt  | 22 | 1       | 7                               | 4    | 5    | 6    | 1     | 4                          | 10   | 1    | 5    | 2    | 2.60       | 2     | 12                              | 4 | 6  | 0 | 0 | 1.73       | 1     |
|                      |    | in %    | 31.8                            | 18.2 | 22.7 | 27.3 |       | 18.2                       | 45.5 | 4.5  | 22.7 | 9.1  |            |       |                                 |   |    |   |   |            |       |
| Plauen               | 29 | 1       | 2                               | 10   | 8    | 9    | 2     | 4                          | 10   | 8    | 5    | 2    | 2.69       | 2     | 7                               | 8 | 13 | 1 | 0 | 2.28       | 3     |
|                      |    | in %    | 6.9                             | 34.5 | 27.6 | 31   |       | 13.8                       | 34.5 | 27.6 | 17.2 | 6.9  |            |       |                                 |   |    |   |   |            |       |
| Schneeberg           | 24 | 1       | 7                               | 4    | 6    | 7    | *     | 4                          | 9    | 4    | 6    | 1    | 2.63       | 2     | 13                              | 6 | 5  | 0 | 0 | 1.66       | 1     |
|                      |    | in %    | 29.2                            | 16.7 | 25   | 29.2 |       | 16.7                       | 37.5 | 16.7 | 25   | 4.2  |            |       |                                 |   |    |   |   |            |       |
| Zwickau              | 30 | 1       | 1                               | 6    | 11   | 12   | 4     | 4                          | 6    | 5    | 12   | 3    | 3.13       | 4     | 12                              | 6 | 10 | 2 | 0 | 2.06       | 1     |
|                      |    | in %    | 3.3                             | 20   | 36.7 | 40   |       | 13.3                       | 20   | 16.7 | 40   | 10   |            |       |                                 |   |    |   |   |            |       |
| Altenburg            | 22 | 2       | 3                               | 5    | 11   | 3    | 3     | 4                          | 8    | 5    | 3    | 2    | 2.59       | 2     | 3                               | 7 | 10 | 2 | 0 | 2.50       | 4     |
|                      |    | in %    | 13.6                            | 22.7 | 50   | 13.6 |       | 18.2                       | 36.4 | 22.7 | 13.6 | 9.1  |            |       |                                 |   |    |   |   |            |       |
| Bitterfeld           | 26 | 2       | 5                               | 6    | 6    | 9    | 4     | 3                          | 9    | 4    | 4    | 6    | 3.04       | 2     | 9                               | 7 | 7  | 2 | 1 | 2.19       | 1     |
|                      |    | in %    | 19.2                            | 23.1 | 23.1 | 34.6 |       | 11.5                       | 34.6 | 15.4 | 15.4 | 23.1 |            |       |                                 |   |    |   |   |            |       |
| Delitzsch            | 28 | 2       | 1                               | 6    | 11   | 10   | 3     | 3                          | 11   | 4    | 5    | 5    | 2.93       | 2     | 10                              | 7 | 9  | 2 | 0 | 2.12       | 1     |
|                      |    | in %    | 3.6                             | 21.4 | 39.3 | 35.7 |       | 10.7                       | 39.3 | 14.3 | 17.9 | 17.9 |            |       |                                 |   |    |   |   |            |       |
| Dessau               | 23 | 2       | 6                               | 7    | 8    | 2    | 3     | 2                          | 11   | 3    | 2    | 5    | 2.87       | 2     | 5                               | 3 | 11 | 4 | 0 | 2.61       | 3     |



|                |      |   |      |      |      |      |   |   |      |      |      |      |      |   |    |    |    |    |   |      |   |
|----------------|------|---|------|------|------|------|---|---|------|------|------|------|------|---|----|----|----|----|---|------|---|
| Cottbus        | 29   | 4 | 23   | 5    | 1    | 0    | 1 | 4 | 14   | 6    | 5    | 0    | 2.41 | 2 | 0  | 1  | 14 | 10 | 4 | 3.58 | 3 |
|                | in % |   | 79.3 | 17.2 | 3.5  | 0    |   |   | 13.8 | 48.3 | 20.7 | 17.2 | 0    |   |    |    |    |    |   |      |   |
| Elsterwerda    | 29   | 4 | 16   | 7    | 5    | 1    | 1 | 2 | 14   | 6    | 5    | 2    | 2.69 | 2 | 3  | 2  | 14 | 10 | 0 | 3.07 | 3 |
|                | in % |   | 55.2 | 24.1 | 17.2 | 3.5  |   |   | 6.9  | 48.3 | 20.7 | 17.2 | 6.9  |   |    |    |    |    |   |      |   |
| Finsterwalde   | 27   | 4 | 18   | 7    | 2    | 0    | 1 | 4 | 14   | 4    | 5    | 0    | 2.37 | 2 | 0  | 2  | 12 | 11 | 2 | 3.48 | 3 |
|                | in % |   | 66.7 | 25.9 | 7.4  | 0    |   |   | 14.8 | 51.9 | 14.8 | 18.5 | 0    |   |    |    |    |    |   |      |   |
| Hoyerswerda    | 30   | 4 | 12   | 15   | 1    | 2    | 2 | 5 | 14   | 6    | 3    | 2    | 2.43 | 2 | 3  | 4  | 17 | 4  | 2 | 2.93 | 3 |
|                | in % |   | 40   | 50   | 3.3  | 6.7  |   |   | 16.7 | 46.7 | 20   | 10   | 6.7  |   |    |    |    |    |   |      |   |
| Lübbenau       | 30   | 4 | 23   | 6    | 1    | 0    | 1 | 4 | 14   | 7    | 5    | 0    | 2.43 | 2 | 0  | 2  | 17 | 8  | 3 | 3.13 | 3 |
|                | in % |   | 76.7 | 20   | 3.3  | 0    |   |   | 13.3 | 46.7 | 23.3 | 16.7 | 0    |   |    |    |    |    |   |      |   |
| Senftenberg    | 30   | 4 | 21   | 7    | 2    | 0    | 1 | 4 | 12   | 8    | 6    | 0    | 2.53 | 2 | 0  | 1  | 16 | 11 | 2 | 3.47 | 3 |
|                | in % |   | 70   | 23.3 | 6.7  | 0    |   |   | 13.3 | 40   | 26.7 | 20   | 0    |   |    |    |    |    |   |      |   |
| Spremberg      | 29   | 4 | 20   | 8    | 1    | 0    | 1 | 3 | 14   | 6    | 6    | 0    | 2.52 | 2 | 0  | 1  | 15 | 11 | 2 | 3.48 | 3 |
|                | in % |   | 69   | 27.6 | 3.4  | 0    |   |   | 10.3 | 48.3 | 20.7 | 20.7 | 0    |   |    |    |    |    |   |      |   |
| Weisswasser    | 30   | 4 | 16   | 10   | 3    | 1    | 1 | 3 | 18   | 6    | 1    | 2    | 2.37 | 2 | 2  | 2  | 15 | 9  | 2 | 3.23 | 3 |
|                | in % |   | 53.3 | 33.3 | 10   | 3.3  |   |   | 10   | 60   | 20   | 3.3  | 6.6  |   |    |    |    |    |   |      |   |
| Dippoldiswalde | 27   | 5 | 4    | 4    | 10   | 9    | 3 | 2 | 16   | 3    | 2    | 4    | 2.63 | 2 | 9  | 7  | 9  | 2  | 0 | 2.15 | * |
|                | in % |   | 14.8 | 14.8 | 37   | 33.3 |   |   | 7.4  | 59.3 | 11.1 | 7.4  | 14.8 |   |    |    |    |    |   |      |   |
| Dresden        | 29   | 5 | 0    | 1    | 7    | 21   | 4 | 2 | 15   | 4    | 2    | 6    | 2.83 | 2 | 13 | 12 | 3  | 1  | 0 | 1.72 | 1 |
|                | in % |   | 0    | 3.4  | 24.1 | 72.4 |   |   | 6.9  | 51.7 | 13.8 | 6.9  | 20.7 |   |    |    |    |    |   |      |   |
| Freiberg       | 26   | 5 | 1    | 4    | 8    | 13   | 4 | 2 | 9    | 6    | 6    | 3    | 2.96 | 2 | 10 | 7  | 8  | 1  | 0 | 2.00 | 1 |
|                | in % |   | 3.8  | 15.4 | 30.8 | 50   |   |   | 7.7  | 34.6 | 23.1 | 23.1 | 11.5 |   |    |    |    |    |   |      |   |
| Großenhain     | 29   | 5 | 7    | 4    | 9    | 9    | * | 1 | 15   | 6    | 6    | 1    | 2.69 | 2 | 7  | 6  | 9  | 7  | 0 | 2.55 | 3 |
|                | in % |   | 24.1 | 13.8 | 31   | 31   |   |   | 3.5  | 51.7 | 20.7 | 20.7 | 3.5  |   |    |    |    |    |   |      |   |
| Meißen         | 30   | 5 | 2    | 2    | 10   | 16   | 4 | 2 | 16   | 6    | 2    | 4    | 2.66 | 2 | 8  | 12 | 9  | 1  | 0 | 2.10 | 2 |
|                | in % |   | 6.7  | 6.7  | 33.3 | 53.3 |   |   | 6.7  | 53.3 | 20   | 6.7  | 13.3 |   |    |    |    |    |   |      |   |
| Pirna          | 30   | 5 | 0    | 3    | 11   | 16   | 4 | 2 | 13   | 7    | 3    | 5    | 2.70 | 2 | 8  | 9  | 12 | 1  | 0 | 2.20 | 3 |
|                | in % |   | 0    | 10   | 36.7 | 53.3 |   |   | 6.7  | 44.8 | 24.1 | 10.3 | 17.2 |   |    |    |    |    |   |      |   |
| Riesa          | 27   | 5 | 0    | 3    | 11   | 13   | 4 | 2 | 11   | 6    | 5    | 3    | 2.85 | 2 | 9  | 8  | 9  | 1  | 0 | 2.07 | * |
|                | in % |   | 0    | 11.1 | 40.7 | 48.1 |   |   | 7.4  | 40.7 | 22.2 | 18.5 | 11.1 |   |    |    |    |    |   |      |   |

|                            |      |   |      |      |      |      |   |   |      |      |      |      |      |   |   |   |    |   |   |      |   |
|----------------------------|------|---|------|------|------|------|---|---|------|------|------|------|------|---|---|---|----|---|---|------|---|
| Sebnitz                    | 28   | 5 | 4    | 3    | 11   | 10   | 3 | 4 | 13   | 4    | 3    | 4    | 2.64 | 2 | 7 | 7 | 11 | 3 | 0 | 2.36 | 3 |
|                            | in % |   | 14.3 | 10.7 | 39.3 | 35.7 |   |   | 14.3 | 46.4 | 14.3 | 10.7 | 14.3 |   |   |   |    |   |   |      |   |
| Gera                       | 28   | 6 | 9    | 12   | 6    | 1    | 2 | 3 | 14   | 5    | 3    | 3    | 2.61 | 2 | 4 | 7 | 12 | 5 | 0 | 2.64 | 3 |
|                            | in % |   | 32.1 | 42.9 | 21.4 | 3.6  |   |   | 10.7 | 50   | 17.9 | 10.7 | 10.7 |   |   |   |    |   |   |      |   |
| Hof                        | 26   | 6 | 18   | 6    | 2    | 0    | 1 | 0 | 17   | 6    | 2    | 1    | 2.50 | 2 | 5 | 6 | 12 | 3 | 0 | 2.50 | 3 |
|                            | in % |   | 69.2 | 23   | 7.7  | 0    |   |   | 0    | 65.4 | 23   | 7.7  | 3.8  |   |   |   |    |   |   |      |   |
| Jena                       | 24   | 6 | 8    | 5    | 10   | 1    | 3 | 3 | 13   | 4    | 2    | 2    | 2.46 | 2 | 3 | 8 | 9  | 4 | 0 | 3.58 | 3 |
|                            | in % |   | 33.3 | 20.8 | 41.7 | 4.2  |   |   | 12.5 | 54.2 | 16.7 | 8.3  | 8.3  |   |   |   |    |   |   |      |   |
| Weimar                     | 27   | 6 | 11   | 8    | 7    | 1    | 1 | 2 | 15   | 7    | 3    | 0    | 2.41 | 2 | 2 | 9 | 12 | 4 | 0 | 2.66 | 3 |
|                            | in % |   | 40.7 | 29.6 | 25.9 | 3.7  |   |   | 7.4  | 55.5 | 25.9 | 11.1 | 0    |   |   |   |    |   |   |      |   |
| Lutherstadt-<br>Wittenberg | 24   | 7 | 11   | 8    | 4    | 1    | 1 | 2 | 11   | 6    | 3    | 2    | 2.66 | 2 | 3 | 3 | 12 | 5 | 1 | 2.92 | 3 |
|                            | in % |   | 45.8 | 33.3 | 16.7 | 4.2  |   |   | 8.3  | 45.8 | 25   | 12.5 | 8.3  |   |   |   |    |   |   |      |   |

Tabelle 39: *Obersächsische Ausprägung, Gefallen und Korrektheit* der gültigen Städte der lausitzischen Gruppe

| Stadt                 | Σ    | Cluster | Ausprägung <i>Obersächsisch</i> |      |      |      |       | Ausprägung <i>Gefallen</i> |      |      |      |      |            | Ausprägung <i>Dialektalität</i> |    |    |    |   |   |            |       |
|-----------------------|------|---------|---------------------------------|------|------|------|-------|----------------------------|------|------|------|------|------------|---------------------------------|----|----|----|---|---|------------|-------|
|                       |      |         | 1                               | 2    | 3    | 4    | Modus | 1                          | 2    | 3    | 4    | 5    | Mittelwert | Modus                           | 1  | 2  | 3  | 4 | 5 | Mittelwert | Modus |
| Altenburg             | 28   | 1       | 6                               | 9    | 8    | 5    | 2     | 0                          | 11   | 11   | 6    | 0    | 2.82       | *                               | 3  | 12 | 11 | 2 | 0 | 2.43       | 2     |
|                       | in % |         | 21.4                            | 32.1 | 10.7 | 14.3 |       |                            | 0    | 39.3 | 39.3 | 21.4 | 0          |                                 |    |    |    |   |   |            |       |
| Gera                  | 27   | 1       | 9                               | 9    | 6    | 3    | *     | 1                          | 15   | 8    | 2    | 1    | 2.52       | 2                               | 2  | 10 | 11 | 4 | 0 | 2.63       | 3     |
|                       | in % |         | 33.3                            | 33.3 | 22.2 | 11.1 |       |                            | 3.7  | 55.5 | 29.6 | 7.4  | 3.7        |                                 |    |    |    |   |   |            |       |
| Jena                  | 24   | 1       | 13                              | 7    | 3    | 1    | 1     | 0                          | 14   | 7    | 3    | 0    | 2.54       | 2                               | 2  | 7  | 10 | 5 | 0 | 2.75       | 3     |
|                       | in % |         | 54.2                            | 29.2 | 12.5 | 4.2  |       |                            | 0    | 58.3 | 29.2 | 12.5 | 0          |                                 |    |    |    |   |   |            |       |
| Weimar                | 24   | 1       | 15                              | 5    | 2    | 2    | 1     | 1                          | 16   | 5    | 2    | 0    | 2.33       | 2                               | 2  | 6  | 8  | 7 | 1 | 2.96       | 3     |
|                       | in % |         | 62.5                            | 20.8 | 8.3  | 8.3  |       |                            | 4.2  | 66.7 | 20.8 | 8.3  | 0          |                                 |    |    |    |   |   |            |       |
| Zeitz                 | 22   | 1       | 6                               | 8    | 3    | 5    | 2     | 0                          | 12   | 6    | 4    | 0    | 2.64       | 2                               | 2  | 8  | 8  | 4 | 0 | 2.64       | *     |
|                       | in % |         | 27.3                            | 36.4 | 13.6 | 22.7 |       |                            | 0    | 54.5 | 27.3 | 18.2 | 0          |                                 |    |    |    |   |   |            |       |
| Annaberg-<br>Buchholz | 27   | 2       | 5                               | 5    | 6    | 11   | 4     | 5                          | 9    | 4    | 6    | 3    | 2.74       | 2                               | 16 | 6  | 5  | 0 | 0 | 1.59       | 1     |
|                       | in % |         | 18.5                            | 18.5 | 22.2 | 40.7 |       |                            | 18.5 | 33.3 | 14.8 | 22.2 | 11.1       |                                 |    |    |    |   |   |            |       |





|                        |      |   |      |      |      |     |   |   |      |      |      |      |      |   |   |   |    |   |   |      |   |
|------------------------|------|---|------|------|------|-----|---|---|------|------|------|------|------|---|---|---|----|---|---|------|---|
| Halle                  | 29   | 6 | 11   | 12   | 5    | 1   | 2 | 2 | 11   | 8    | 4    | 4    | 2.90 | 2 | 3 | 6 | 14 | 6 | 0 | 2.79 | 3 |
|                        | in % |   | 37.9 | 41.4 | 17.2 | 3.5 |   |   | 6.9  | 37.9 | 27.6 | 13.8 | 13.8 |   |   |   |    |   |   |      |   |
| Köthen                 | 25   | 6 | 9    | 11   | 4    | 1   | 2 | 2 | 8    | 9    | 3    | 3    | 2.88 | 3 | 2 | 7 | 12 | 4 | 0 | 2.72 | 3 |
|                        | in % |   | 36   | 44   | 16   | 4   |   |   | 8    | 32   | 36   | 12   | 12   |   |   |   |    |   |   |      |   |
| Lutherstadt-Wittenberg | 25   | 6 | 13   | 8    | 4    | 0   | 1 | 4 | 7    | 9    | 4    | 1    | 2.64 | 3 | 2 | 5 | 12 | 6 | 0 | 2.88 | 3 |
|                        | in % |   | 52   | 32   | 16   | 0   |   |   | 16   | 28   | 36   | 16   | 4    |   |   |   |    |   |   |      |   |
| Merseburg              | 27   | 6 | 9    | 13   | 4    | 1   | 2 | 3 | 10   | 9    | 3    | 2    | 2.66 | 2 | 4 | 6 | 12 | 5 | 0 | 2.66 | 3 |
|                        | in % |   | 33.3 | 48.1 | 14.8 | 3.7 |   |   | 11.1 | 37   | 33.3 | 11.1 | 7.4  |   |   |   |    |   |   |      |   |
| Hof                    | 24   | 7 | 21   | 3    | 0    | 0   | 1 | 1 | 9    | 6    | 4    | 4    | 3.04 | 2 | 9 | 4 | 6  | 5 | 0 | 2.29 | 1 |
|                        | in % |   | 87.5 | 12.5 | 0    | 0   |   |   | 4.2  | 37.5 | 25   | 16.7 | 16.7 |   |   |   |    |   |   |      |   |

Tabelle 40: *Obersächsische Ausprägung, Gefallen und Korrektheit* der gültigen Städte der osterländische Gruppe

| Stadt               | Σ    | Cluster | Ausprägung <i>Obersächsisch</i> |      |      |      |       | Ausprägung <i>Gefallen</i> |      |      |      |      |            |       | Ausprägung <i>Dialektalität</i> |    |    |   |   |            |       |
|---------------------|------|---------|---------------------------------|------|------|------|-------|----------------------------|------|------|------|------|------------|-------|---------------------------------|----|----|---|---|------------|-------|
|                     |      |         | 1                               | 2    | 3    | 4    | Modus | 1                          | 2    | 3    | 4    | 5    | Mittelwert | Modus | 1                               | 2  | 3  | 4 | 5 | Mittelwert | Modus |
| Altenberg           | 22   | 1       | 2                               | 8    | 4    | 8    | *     | 2                          | 16   | 1    | 2    | 1    | 2.27       | 2     | 9                               | 9  | 4  | 0 | 0 | 1.77       | *     |
|                     | in % |         | 9.1                             | 36.4 | 18.2 | 36.4 |       |                            | 9.1  | 72.7 | 4.5  | 9.1  | 4.5        |       |                                 |    |    |   |   |            |       |
| Annaberg-Buchholz   | 27   | 1       | 8                               | 9    | 4    | 6    | 2     | 6                          | 13   | 1    | 4    | 3    | 2.44       | 2     | 15                              | 11 | 1  | 0 | 0 | 1.48       | 1     |
|                     | in % |         | 29.6                            | 33.3 | 14.8 | 22.2 |       |                            | 22.2 | 48.2 | 3.7  | 14.8 | 11.1       |       |                                 |    |    |   |   |            |       |
| Johann-georgenstadt | 26   | 1       | 7                               | 10   | 4    | 5    | 2     | 8                          | 13   | 1    | 2    | 2    | 2.11       | 2     | 13                              | 12 | 1  | 0 | 0 | 1.54       | 1     |
|                     | in % |         | 26.9                            | 38.5 | 15.4 | 19.2 |       |                            | 30.8 | 50   | 3.8  | 7.7  | 7.7        |       |                                 |    |    |   |   |            |       |
| Olbernhau           | 23   | 1       | 6                               | 8    | 4    | 5    | 2     | 4                          | 11   | 2    | 3    | 3    | 2.57       | 2     | 14                              | 8  | 1  | 0 | 0 | 1.43       | 1     |
|                     | in % |         | 26.1                            | 34.8 | 17.4 | 21.7 |       |                            | 17.4 | 47.8 | 8.7  | 13   | 13         |       |                                 |    |    |   |   |            |       |
| Schneeberg          | 29   | 1       | 8                               | 10   | 4    | 7    | 2     | 8                          | 13   | 1    | 4    | 3    | 2.34       | 2     | 16                              | 13 | 0  | 0 | 0 | 1.45       | 1     |
|                     | in % |         | 27.6                            | 34.5 | 13.8 | 24.1 |       |                            | 27.6 | 44.8 | 3.5  | 13.8 | 10.3       |       |                                 |    |    |   |   |            |       |
| Altenburg           | 24   | 2       | 6                               | 4    | 5    | 9    | 4     | 1                          | 5    | 14   | 2    | 2    | 2.96       | 3     | 5                               | 7  | 10 | 2 | 0 | 2.38       | 3     |
|                     | in % |         | 25                              | 16.7 | 20.8 | 37.5 |       |                            | 4.2  | 20.8 | 58.3 | 8.3  | 8.3        |       |                                 |    |    |   |   |            |       |
| Bitterfeld          | 23   | 2       | 3                               | 6    | 4    | 10   | 4     | 0                          | 10   | 6    | 6    | 1    | 2.91       | 2     | 7                               | 7  | 7  | 2 | 0 | 2.17       | *     |
|                     | in % |         | 13                              | 26.1 | 17.4 | 43.5 |       |                            | 0    | 43.5 | 26.1 | 26.1 | 4.3        |       |                                 |    |    |   |   |            |       |





|                          |      |   |      |      |      |      |   |   |      |      |      |      |      |   |    |    |    |   |   |      |   |
|--------------------------|------|---|------|------|------|------|---|---|------|------|------|------|------|---|----|----|----|---|---|------|---|
| Hof                      | 29   | 4 | 27   | 2    | 0    | 0    | 1 | 4 | 10   | 8    | 4    | 3    | 2.72 | 2 | 10 | 7  | 9  | 3 | 0 | 1.79 | 1 |
|                          | in % |   | 93.1 | 6.9  | 0    | 0    |   |   | 13.8 | 34.5 | 27.6 | 13.8 | 10.3 |   |    |    |    |   |   |      |   |
| Bautzen                  | 26   | 5 | 7    | 12   | 4    | 3    | 2 | 4 | 11   | 7    | 4    | 0    | 2.42 | 2 | 7  | 5  | 8  | 6 | 0 | 2.50 | 3 |
|                          | in % |   | 26.9 | 46.2 | 15.4 | 11.5 |   |   | 15.4 | 42.3 | 26.9 | 15.4 | 0    |   |    |    |    |   |   |      |   |
| Cottbus                  | 25   | 5 | 15   | 9    | 1    | 0    | 1 | 2 | 13   | 9    | 1    | 0    | 2.36 | 2 | 3  | 4  | 10 | 8 | 0 | 2.92 | 3 |
|                          | in % |   | 60   | 36   | 4    | 0    |   |   | 8    | 52   | 36   | 4    | 0    |   |    |    |    |   |   |      |   |
| Görlitz                  | 26   | 5 | 5    | 11   | 5    | 5    | 2 | 4 | 13   | 5    | 4    | 0    | 2.35 | 2 | 6  | 7  | 9  | 4 | 0 | 2.42 | 3 |
|                          | in % |   | 19.2 | 42.3 | 19.2 | 19.2 |   |   | 15.4 | 50   | 19.2 | 15.4 | 0    |   |    |    |    |   |   |      |   |
| Hoyerswerda              | 24   | 5 | 7    | 9    | 4    | 4    | 2 | 1 | 10   | 7    | 5    | 1    | 2.79 | 2 | 5  | 6  | 10 | 3 | 0 | 2.46 | 3 |
|                          | in % |   | 29.2 | 37.5 | 16.7 | 16.7 |   |   | 4.2  | 41.7 | 29.2 | 20.8 | 4.2  |   |    |    |    |   |   |      |   |
| Kamenz                   | 25   | 5 | 5    | 10   | 2    | 8    | 2 | 4 | 10   | 4    | 6    | 1    | 2.60 | 2 | 10 | 5  | 6  | 4 | 0 | 2.16 | 1 |
|                          | in % |   | 20   | 40   | 8    | 32   |   |   | 16   | 40   | 16   | 24   | 4    |   |    |    |    |   |   |      |   |
| Zittau                   | 26   | 5 | 7    | 12   | 2    | 5    | * | 4 | 14   | 4    | 3    | 1    | 2.35 | 2 | 6  | 9  | 8  | 3 | 0 | 2.31 | 2 |
|                          | in % |   | 26.9 | 46.2 | 7.7  | 19.2 |   |   | 15.4 | 53.8 | 15.4 | 11.5 | 3.8  |   |    |    |    |   |   |      |   |
| Burgstädt                | 23   | 6 | 1    | 3    | 10   | 9    | 3 | 0 | 6    | 6    | 6    | 5    | 2.70 | * | 3  | 12 | 6  | 2 | 0 | 2.30 | 2 |
|                          | in % |   | 4.3  | 13   | 43.5 | 39.1 |   |   | 0    | 26.1 | 26.1 | 26.1 | 21.7 |   |    |    |    |   |   |      |   |
| Chemnitz                 | 30   | 6 | 0    | 3    | 15   | 12   | 3 | 0 | 11   | 6    | 7    | 6    | 3.26 | 2 | 7  | 14 | 8  | 1 | 0 | 2.10 | 2 |
|                          | in % |   | 0    | 10   | 50   | 40   |   |   | 0    | 36.7 | 20   | 23.3 | 20   |   |    |    |    |   |   |      |   |
| Crimmitschau             | 23   | 6 | 1    | 4    | 10   | 8    | 3 | 2 | 5    | 6    | 4    | 6    | 3.30 | * | 4  | 10 | 8  | 1 | 0 | 2.26 | 2 |
|                          | in % |   | 4.3  | 17.4 | 43.5 | 34.8 |   |   | 8.7  | 21.7 | 26.1 | 17.4 | 26.1 |   |    |    |    |   |   |      |   |
| Flöha                    | 26   | 6 | 0    | 6    | 9    | 11   | 4 | 1 | 10   | 4    | 6    | 5    | 3.15 | 2 | 7  | 11 | 8  | 0 | 0 | 2.04 | 2 |
|                          | in % |   | 0    | 23.1 | 34.6 | 42.3 |   |   | 3.8  | 38.5 | 15.4 | 23.1 | 19.2 |   |    |    |    |   |   |      |   |
| Freiberg                 | 30   | 6 | 3    | 4    | 9    | 14   | 4 | 1 | 14   | 4    | 4    | 7    | 3.06 | 2 | 9  | 15 | 6  | 0 | 0 | 1.90 | 2 |
|                          | in % |   | 10   | 13.3 | 30   | 46.7 |   |   | 3.3  | 46.7 | 13.3 | 13.3 | 23.3 |   |    |    |    |   |   |      |   |
| Hohenstein-<br>Ernstthal | 28   | 6 | 1    | 4    | 10   | 13   | 4 | 3 | 8    | 5    | 6    | 6    | 3.14 | 2 | 7  | 10 | 10 | 1 | 0 | 2.18 | * |
|                          | in % |   | 3.6  | 14.3 | 35.7 | 46.4 |   |   | 10.7 | 28.6 | 17.9 | 21.4 | 21.4 |   |    |    |    |   |   |      |   |
| Mittweida                | 27   | 6 | 0    | 2    | 14   | 11   | 3 | 0 | 8    | 6    | 8    | 5    | 3.59 | * | 6  | 14 | 5  | 2 | 0 | 2.11 | 2 |
|                          | in % |   | 0    | 7.4  | 51.9 | 40.7 |   |   | 0    | 29.6 | 22.2 | 29.6 | 18.5 |   |    |    |    |   |   |      |   |
| Rochlitz                 | 25   | 6 | 1    | 2    | 10   | 12   | 4 | 1 | 4    | 6    | 8    | 6    | 3.56 | 4 | 7  | 10 | 7  | 1 | 0 | 2.08 | 2 |
|                          | in % |   | 4    | 8    | 40   | 48   |   |   | 4    | 16   | 24   | 32   | 24   |   |    |    |    |   |   |      |   |



|                          |      |   |      |      |      |      |   |   |      |      |      |      |      |   |    |    |    |   |   |      |   |
|--------------------------|------|---|------|------|------|------|---|---|------|------|------|------|------|---|----|----|----|---|---|------|---|
| Altenburg                | 27   | 1 | 5    | 10   | 10   | 2    | * | 0 | 11   | 11   | 4    | 1    | 2.82 | * | 3  | 8  | 12 | 4 | 0 | 2.62 | 3 |
|                          | in % |   | 18.5 | 37   | 37   | 7.4  |   |   | 0    | 40.7 | 40.7 | 14.8 | 3.7  |   |    |    |    |   |   |      |   |
| Gera                     | 30   | 1 | 5    | 17   | 8    | 0    | 2 | 0 | 13   | 11   | 5    | 1    | 2.80 | 2 | 3  | 9  | 14 | 4 | 0 | 2.63 | 3 |
|                          | in % |   | 16.7 | 56.7 | 26.7 | 0    |   |   | 0    | 43.3 | 36.7 | 16.7 | 3.3  |   |    |    |    |   |   |      |   |
| Greiz                    | 29   | 1 | 5    | 14   | 9    | 1    | 2 | 1 | 12   | 9    | 6    | 1    | 2.79 | 2 | 3  | 7  | 17 | 2 | 0 | 2.62 | 3 |
|                          | in % |   | 17.2 | 48.3 | 31   | 3.5  |   |   | 3.5  | 41.4 | 31   | 20.7 | 3.5  |   |    |    |    |   |   |      |   |
| Jena                     | 27   | 1 | 12   | 10   | 5    | 0    | 1 | 0 | 13   | 9    | 5    | 0    | 2.70 | 2 | 0  | 8  | 13 | 6 | 0 | 2.93 | 3 |
|                          | in % |   | 44.4 | 37   | 18.5 | 0    |   |   | 0    | 48.2 | 33.3 | 18.5 | 0    |   |    |    |    |   |   |      |   |
| Naumburg                 | 28   | 1 | 9    | 10   | 6    | 3    | 2 | 1 | 13   | 11   | 2    | 1    | 2.61 | 2 | 2  | 9  | 11 | 6 | 0 | 2.75 | 3 |
|                          | in % |   | 32.1 | 35.7 | 21.4 | 10.7 |   |   | 3.6  | 46.4 | 39.3 | 7.1  | 3.6  |   |    |    |    |   |   |      |   |
| Pörsneck                 | 26   | 1 | 7    | 13   | 6    | 0    | 2 | 1 | 11   | 8    | 5    | 1    | 2.77 | 2 | 1  | 10 | 11 | 4 | 0 | 2.69 | 3 |
|                          | in % |   | 26.9 | 50   | 23.1 | 0    |   |   | 3.9  | 42.3 | 30.8 | 19.2 | 3.9  |   |    |    |    |   |   |      |   |
| Schleiz                  | 30   | 1 | 6    | 12   | 9    | 3    | 2 | 3 | 14   | 5    | 5    | 3    | 2.70 | 2 | 5  | 9  | 14 | 2 | 0 | 2.43 | 3 |
|                          | in % |   | 20   | 40   | 30   | 10   |   |   | 10   | 46.7 | 16.7 | 16.7 | 10   |   |    |    |    |   |   |      |   |
| Weimar                   | 29   | 1 | 12   | 12   | 5    | 0    | * | 0 | 14   | 10   | 5    | 0    | 2.67 | 2 | 0  | 9  | 13 | 7 | 0 | 2.93 | 3 |
|                          | in % |   | 41.4 | 41.4 | 17.2 | 0    |   |   | 0    | 48.3 | 34.5 | 17.2 | 0    |   |    |    |    |   |   |      |   |
| Zeitz                    | 22   | 1 | 4    | 6    | 6    | 7    | 4 | 0 | 8    | 7    | 5    | 3    | 3.13 | 2 | 4  | 6  | 11 | 2 | 0 | 2.44 | 3 |
|                          | in % |   | 18.2 | 27.3 | 27.3 | 31.8 |   |   | 0    | 36.4 | 31.8 | 22.7 | 13.6 |   |    |    |    |   |   |      |   |
| Annaberg-<br>Buchholz    | 23   | 2 | 8    | 5    | 6    | 4    | 1 | 2 | 10   | 7    | 2    | 2    | 2.65 | 2 | 11 | 8  | 3  | 1 | 0 | 1.74 | 1 |
|                          | in % |   | 34.8 | 21.7 | 26.1 | 17.4 |   |   | 8.7  | 43.5 | 30.4 | 8.7  | 8.7  |   |    |    |    |   |   |      |   |
| Chemnitz                 | 29   | 2 | 1    | 6    | 9    | 14   | 4 | 2 | 12   | 6    | 6    | 4    | 2.97 | 2 | 12 | 9  | 8  | 1 | 0 | 1.97 | 1 |
|                          | in % |   | 3.5  | 20.7 | 31   | 48.3 |   |   | 6.9  | 41.4 | 20.7 | 20.7 | 13.8 |   |    |    |    |   |   |      |   |
| Crimmitschau             | 23   | 2 | 1    | 4    | 8    | 10   | 4 | 1 | 8    | 4    | 7    | 3    | 3.13 | 2 | 6  | 7  | 9  | 1 | 0 | 2.22 | 3 |
|                          | in % |   | 4.3  | 17.4 | 34.8 | 43.5 |   |   | 4.3  | 34.8 | 17.4 | 30.4 | 13   |   |    |    |    |   |   |      |   |
| Hohenstein-<br>Ernstthal | 26   | 2 | 6    | 5    | 8    | 7    | 3 | 3 | 12   | 8    | 1    | 2    | 2.50 | 2 | 7  | 8  | 9  | 2 | 0 | 2.23 | 3 |
|                          | in % |   | 23.1 | 19.2 | 30.8 | 26.9 |   |   | 11.5 | 46.2 | 30.8 | 3.8  | 7.7  |   |    |    |    |   |   |      |   |
| Plauen                   | 28   | 2 | 6    | 6    | 12   | 4    | 3 | 2 | 16   | 6    | 2    | 2    | 2.50 | 2 | 8  | 12 | 6  | 2 | 0 | 2.07 | 2 |
|                          | in % |   | 21.4 | 21.4 | 42.9 | 14.3 |   |   | 7.1  | 57.1 | 21.4 | 7.1  | 7.1  |   |    |    |    |   |   |      |   |
| Schneeberg               | 22   | 2 | 7    | 4    | 6    | 5    | 1 | 2 | 12   | 7    | 1    | 0    | 2.32 | 2 | 9  | 9  | 3  | 1 | 0 | 1.82 | * |
|                          | in % |   | 31.8 | 18.2 | 27.3 | 22.7 |   |   | 9.1  | 54.5 | 31.8 | 4.6  | 0    |   |    |    |    |   |   |      |   |

|               |      |   |      |      |      |      |   |      |      |      |      |      |      |   |    |    |   |   |   |      |   |
|---------------|------|---|------|------|------|------|---|------|------|------|------|------|------|---|----|----|---|---|---|------|---|
| Zwickau       | 27   | 2 | 1    | 5    | 11   | 10   | 3 | 1    | 13   | 5    | 3    | 5    | 2.93 | 2 | 8  | 10 | 7 | 2 | 0 | 2.11 | 2 |
|               | in % |   | 3.7  | 18.5 | 40.7 | 37   |   | 3.7  | 48.2 | 18.5 | 11.1 | 18.5 |      |   |    |    |   |   |   |      |   |
| Bad Brambach  | 22   | 3 | 13   | 4    | 4    | 1    | 1 | 2    | 8    | 7    | 5    | 0    | 2.68 | 2 | 5  | 6  | 9 | 2 | 0 | 2.36 | 3 |
|               | in % |   | 59.1 | 18.2 | 18.2 | 4.5  |   | 9.1  | 36.4 | 31.8 | 22.7 | 0    |      |   |    |    |   |   |   |      |   |
| Bamberg       | 29   | 3 | 29   | 0    | 0    | 0    | 1 | 3    | 7    | 10   | 7    | 2    | 2.93 | 3 | 9  | 8  | 8 | 4 | 0 | 2.24 | 1 |
|               | in % |   | 100  | 0    | 0    | 0    |   | 10.3 | 24.1 | 34.5 | 24.1 | 6.9  |      |   |    |    |   |   |   |      |   |
| Bayreuth      | 29   | 3 | 29   | 0    | 0    | 0    | 1 | 3    | 7    | 10   | 7    | 2    | 2.93 | 3 | 9  | 8  | 8 | 4 | 0 | 2.24 | 1 |
|               | in % |   | 100  | 0    | 0    | 0    |   | 10.3 | 24.1 | 34.5 | 24.1 | 6.9  |      |   |    |    |   |   |   |      |   |
| Hof           | 29   | 3 | 26   | 1    | 1    | 1    | 1 | 3    | 6    | 11   | 7    | 2    | 2.97 | 3 | 9  | 8  | 8 | 4 | 0 | 2.24 | * |
|               | in % |   | 89.5 | 3.5  | 3.5  | 3.5  |   | 10.3 | 20.7 | 37.9 | 24.1 | 6.9  |      |   |    |    |   |   |   |      |   |
| Bautzen       | 25   | 4 | 3    | 10   | 3    | 8    | 2 | 2    | 9    | 7    | 4    | 2    | 2.79 | 2 | 6  | 9  | 5 | 4 | 0 | 2.29 | 2 |
|               | in % |   | 12   | 40   | 12   | 32   |   | 8    | 36   | 28   | 16   | 8    |      |   |    |    |   |   |   |      |   |
| Bischofswerda | 23   | 4 | 8    | 7    | 3    | 5    | 1 | 0    | 9    | 9    | 3    | 2    | 2.91 | * | 3  | 7  | 7 | 6 | 0 | 2.70 | * |
|               | in % |   | 34.8 | 30.4 | 13   | 21.7 |   | 0    | 39.1 | 39.1 | 13   | 8.7  |      |   |    |    |   |   |   |      |   |
| Cottbus       | 25   | 4 | 8    | 9    | 4    | 4    | 2 | 2    | 9    | 10   | 3    | 1    | 2.68 | 3 | 3  | 7  | 6 | 9 | 0 | 2.68 | 4 |
|               | in % |   | 32   | 36   | 16   | 16   |   | 8    | 36   | 40   | 12   | 4    |      |   |    |    |   |   |   |      |   |
| Delitzsch     | 25   | 4 | 0    | 5    | 6    | 14   | 4 | 1    | 9    | 5    | 7    | 3    | 3.08 | 2 | 6  | 8  | 7 | 4 | 0 | 2.36 | 2 |
|               | in % |   | 0    | 20   | 24   | 56   |   | 4    | 36   | 20   | 28   | 12   |      |   |    |    |   |   |   |      |   |
| Dresden       | 28   | 4 | 0    | 1    | 4    | 23   | 4 | 3    | 14   | 5    | 2    | 4    | 2.64 | 2 | 10 | 13 | 4 | 1 | 0 | 1.86 | 2 |
|               | in % |   | 0    | 3.6  | 14.3 | 82.1 |   | 10.7 | 50   | 17.9 | 7.1  | 14.3 |      |   |    |    |   |   |   |      |   |
| Freiberg      | 23   | 4 | 3    | 6    | 2    | 12   | 4 | 2    | 10   | 9    | 1    | 1    | 2.52 | 2 | 7  | 8  | 6 | 2 | 0 | 2.13 | 2 |
|               | in % |   | 13   | 26.1 | 8.7  | 52.2 |   | 8.7  | 43.5 | 39.1 | 4.3  | 4.3  |      |   |    |    |   |   |   |      |   |
| Görlitz       | 23   | 4 | 3    | 9    | 3    | 8    | 2 | 3    | 12   | 5    | 2    | 1    | 2.39 | 2 | 5  | 7  | 8 | 3 | 0 | 2.39 | 3 |
|               | in % |   | 13   | 39.1 | 13   | 34.8 |   | 13   | 52.2 | 21.7 | 8.7  | 4.4  |      |   |    |    |   |   |   |      |   |
| Grimma        | 25   | 4 | 1    | 4    | 4    | 16   | 4 | 2    | 12   | 3    | 4    | 4    | 2.84 | 2 | 10 | 6  | 8 | 1 | 0 | 2.00 | 1 |
|               | in % |   | 4    | 16   | 16   | 64   |   | 8    | 48   | 12   | 16   | 16   |      |   |    |    |   |   |   |      |   |
| Hoyerswerda   | 23   | 4 | 6    | 10   | 4    | 3    | 2 | 2    | 7    | 11   | 3    | 0    | 2.65 | 3 | 1  | 7  | 8 | 7 | 0 | 2.91 | 3 |
|               | in % |   | 26.1 | 43.5 | 17.4 | 13   |   | 8.7  | 30.4 | 47.8 | 13   | 0    |      |   |    |    |   |   |   |      |   |
| Leipzig       | 27   | 4 | 0    | 2    | 6    | 19   | 4 | 1    | 9    | 4    | 8    | 5    | 3.26 | 2 | 11 | 9  | 6 | 1 | 0 | 1.88 | 1 |
|               | in % |   | 0    | 7.4  | 22.2 | 70.4 |   | 3.7  | 33.3 | 14.8 | 29.6 | 18.5 |      |   |    |    |   |   |   |      |   |

|                        |      |   |      |      |      |      |   |      |      |      |      |      |      |   |    |    |    |    |   |      |   |
|------------------------|------|---|------|------|------|------|---|------|------|------|------|------|------|---|----|----|----|----|---|------|---|
| Meißen                 | 24   | 4 | 0    | 2    | 6    | 16   | 4 | 1    | 15   | 5    | 2    | 1    | 2.46 | 2 | 7  | 11 | 5  | 1  | 0 | 2.00 | 2 |
|                        | in % |   | 0    | 8.3  | 25   | 66.7 |   | 4.2  | 62.5 | 20.8 | 8.3  | 4.2  |      |   |    |    |    |    |   |      |   |
| Pirna                  | 25   | 4 | 0    | 3    | 4    | 18   | 4 | 2    | 12   | 7    | 1    | 3    | 2.64 | 2 | 10 | 10 | 5  | 0  | 0 | 1.80 | * |
|                        | in % |   | 0    | 12   | 16   | 72   |   | 8    | 48   | 28   | 4    | 12   |      |   |    |    |    |    |   |      |   |
| Riesa                  | 24   | 4 | 3    | 5    | 5    | 11   | 4 | 1    | 12   | 8    | 1    | 2    | 2.63 | 2 | 5  | 5  | 9  | 5  | 0 | 2.58 | * |
|                        | in % |   | 12.5 | 20.8 | 20.8 | 45.8 |   | 4.2  | 50   | 33.3 | 4.2  | 8.3  |      |   |    |    |    |    |   |      |   |
| Torgau                 | 25   | 4 | 5    | 6    | 6    | 8    | 4 | 0    | 10   | 8    | 5    | 2    | 2.96 | 2 | 8  | 7  | 6  | 4  | 0 | 2.24 | 1 |
|                        | in % |   | 20   | 24   | 24   | 32   |   | 0    | 40   | 32   | 20   | 8    |      |   |    |    |    |    |   |      |   |
| Zittau                 | 24   | 4 | 3    | 7    | 6    | 8    | 4 | 3    | 11   | 6    | 2    | 2    | 2.54 | 2 | 6  | 8  | 7  | 3  | 0 | 2.29 | 2 |
|                        | in % |   | 12.5 | 29.2 | 25   | 33.3 |   | 12.5 | 45.8 | 25   | 8.3  | 8.3  |      |   |    |    |    |    |   |      |   |
| Bitterfeld             | 25   | 5 | 6    | 5    | 8    | 6    | 3 | 1    | 12   | 6    | 3    | 3    | 2.80 | 2 | 4  | 9  | 7  | 5  | 0 | 2.52 | 2 |
|                        | in % |   | 24   | 20   | 32   | 24   |   | 4    | 48   | 24   | 12   | 12   |      |   |    |    |    |    |   |      |   |
| Dessau                 | 25   | 5 | 5    | 12   | 3    | 5    | 2 | 1    | 10   | 10   | 3    | 1    | 2.72 | * | 4  | 6  | 7  | 8  | 0 | 2.76 | 4 |
|                        | in % |   | 20   | 48   | 12   | 20   |   | 4    | 40   | 40   | 12   | 4    |      |   |    |    |    |    |   |      |   |
| Halle                  | 30   | 5 | 6    | 12   | 8    | 4    | 2 | 1    | 13   | 10   | 3    | 3    | 2.80 | 2 | 3  | 11 | 12 | 4  | 0 | 2.56 | 3 |
|                        | in % |   | 20   | 40   | 26.7 | 13.3 |   | 3.3  | 43.3 | 33.3 | 10   | 10   |      |   |    |    |    |    |   |      |   |
| Köthen                 | 25   | 5 | 7    | 9    | 4    | 5    | 2 | 2    | 9    | 11   | 3    | 0    | 2.60 | 3 | 4  | 7  | 11 | 3  | 0 | 2.52 | 3 |
|                        | in % |   | 28   | 36   | 16   | 20   |   | 8    | 36   | 44   | 12   | 0    |      |   |    |    |    |    |   |      |   |
| Lutherstadt-Wittenberg | 24   | 5 | 10   | 8    | 4    | 2    | 1 | 1    | 11   | 12   | 0    | 0    | 2.46 | 3 | 1  | 5  | 8  | 10 | 0 | 3.13 | 4 |
|                        | in % |   | 41.7 | 33.3 | 16.7 | 8.3  |   | 4.2  | 45.8 | 50   | 0    | 0    |      |   |    |    |    |    |   |      |   |
| Merseburg              | 27   | 5 | 6    | 10   | 5    | 6    | 2 | 0    | 10   | 9    | 5    | 3    | 3.04 | 2 | 4  | 9  | 10 | 4  | 0 | 2.52 | 3 |
|                        | in % |   | 22.2 | 37   | 18.5 | 22.2 |   | 0    | 37   | 33.3 | 18.5 | 11.1 |      |   |    |    |    |    |   |      |   |

Tabelle 42: *Obersächsische Ausprägung, Gefallen und Korrektheit* der gültigen Städte der thüringischen Gruppe

| Stadt             | Σ    | Cluster | Ausprägung <i>Obersächsisch</i> |      |      |      |       | Ausprägung <i>Gefallen</i> |      |      |      |      |            |       | Ausprägung <i>Dialektalität</i> |   |   |   |   |            |       |
|-------------------|------|---------|---------------------------------|------|------|------|-------|----------------------------|------|------|------|------|------------|-------|---------------------------------|---|---|---|---|------------|-------|
|                   |      |         | 1                               | 2    | 3    | 4    | Modus | 1                          | 2    | 3    | 4    | 5    | Mittelwert | Modus | 1                               | 2 | 3 | 4 | 5 | Mittelwert | Modus |
| Annaberg-Buchholz | 22   | 1       | 6                               | 4    | 5    | 7    | 4     | 2                          | 8    | 4    | 5    | 3    | 2.95       | 2     | 9                               | 7 | 5 | 1 | 0 | 1.91       | 1     |
|                   | in % |         | 27.3                            | 18.2 | 22.7 | 31.8 |       | 9.1                        | 36.4 | 18.2 | 22.7 | 13.6 |            |       |                                 |   |   |   |   |            |       |
| Bautzen           | 26   | 1       | 4                               | 5    | 6    | 11   | 4     | 1                          | 12   | 7    | 4    | 2    | 2.77       | 2     | 10                              | 7 | 6 | 3 | 0 | 2.08       | 1     |



|                        |      |      |      |      |      |   |      |      |      |      |      |      |      |   |   |    |    |    |   |      |   |  |
|------------------------|------|------|------|------|------|---|------|------|------|------|------|------|------|---|---|----|----|----|---|------|---|--|
|                        | in % | 14.3 | 21.4 | 28.6 | 35.7 |   | 10.7 | 35.7 | 14.3 | 28.6 | 10.7 |      |      |   |   |    |    |    |   |      |   |  |
| Bad Dübren             | 27   | 2    | 8    | 7    | 10   | 2 | 3    | 2    | 11   | 10   | 4    | 0    | 2.59 | 2 | 3 | 8  | 10 | 6  | 0 | 2.70 | 3 |  |
|                        | in % | 29.6 | 25.9 | 37   | 7.4  |   |      | 7.4  | 40.7 | 37   | 14.8 | 0    |      |   |   |    |    |    |   |      |   |  |
| Bad Dürrenberg         | 23   | 2    | 8    | 9    | 6    | 0 | 2    | 1    | 14   | 6    | 2    | 0    | 2.39 | 2 | 1 | 8  | 11 | 3  | 0 | 2.70 | 3 |  |
|                        | in % | 34.8 | 39.1 | 26.1 | 0    |   |      | 4.3  | 60.9 | 26.1 | 8.7  | 0    |      |   |   |    |    |    |   |      |   |  |
| Bernburg               | 29   | 2    | 10   | 13   | 6    | 0 | 2    | 2    | 14   | 7    | 3    | 3    | 2.69 | 2 | 1 | 8  | 15 | 4  | 1 | 2.86 | 3 |  |
|                        | in % | 34.5 | 44.8 | 20.7 | 0    |   |      | 6.9  | 48.3 | 24.1 | 10.3 | 10.3 |      |   |   |    |    |    |   |      |   |  |
| Bitterfeld             | 29   | 2    | 9    | 13   | 6    | 1 | 2    | 2    | 13   | 9    | 3    | 2    | 2.66 | 2 | 2 | 9  | 12 | 5  | 1 | 2.79 | 3 |  |
|                        | in % | 31   | 44.8 | 20.7 | 3.5  |   |      | 6.9  | 44.8 | 31   | 10.3 | 6.9  |      |   |   |    |    |    |   |      |   |  |
| Dessau                 | 28   | 2    | 12   | 11   | 5    | 0 | 1    | 2    | 13   | 8    | 2    | 3    | 2.68 | 2 | 1 | 5  | 15 | 7  | 0 | 3.00 | 3 |  |
|                        | in % | 42.9 | 39.3 | 17.9 | 0    |   |      | 7.1  | 46.4 | 28.6 | 7.1  | 10.7 |      |   |   |    |    |    |   |      |   |  |
| Halle                  | 29   | 2    | 6    | 16   | 6    | 1 | 2    | 2    | 11   | 11   | 2    | 3    | 2.76 | * | 1 | 10 | 14 | 3  | 1 | 2.76 | 3 |  |
|                        | in % | 20.7 | 55.2 | 20.7 | 3.5  |   |      | 6.9  | 37.9 | 37.9 | 6.9  | 10.3 |      |   |   |    |    |    |   |      |   |  |
| Köthen                 | 30   | 2    | 10   | 14   | 6    | 0 | 2    | 2    | 13   | 9    | 3    | 3    | 2.73 | 2 | 1 | 7  | 17 | 4  | 1 | 3.03 | 3 |  |
|                        | in % | 33.3 | 46.7 | 20   | 0    |   |      | 6.7  | 43.3 | 30   | 10   | 10   |      |   |   |    |    |    |   |      |   |  |
| Lutherstadt-Wittenberg | 30   | 2    | 13   | 13   | 4    | 0 | *    | 2    | 16   | 9    | 1    | 2    | 2.50 | 2 | 1 | 7  | 13 | 9  | 0 | 3.00 | 3 |  |
|                        | in % | 43.3 | 43.3 | 13.3 | 0    |   |      | 6.7  | 53.3 | 30   | 3.3  | 6.7  |      |   |   |    |    |    |   |      |   |  |
| Merseburg              | 28   | 2    | 6    | 14   | 7    | 1 | 2    | 2    | 11   | 9    | 3    | 3    | 2.79 | 2 | 1 | 11 | 12 | 4  | 0 | 2.68 | 3 |  |
|                        | in % | 21.4 | 50   | 25   | 3.6  |   |      | 7.1  | 39.3 | 32.1 | 10.7 | 10.7 |      |   |   |    |    |    |   |      |   |  |
| Naumburg               | 26   | 2    | 8    | 13   | 5    | 0 | 4    | 2    | 12   | 8    | 3    | 1    | 2.58 | 2 | 1 | 8  | 13 | 4  | 0 | 2.77 | 3 |  |
|                        | in % | 30.8 | 50   | 19.2 | 0    |   |      | 7.7  | 46.2 | 30.8 | 11.5 | 3.8  |      |   |   |    |    |    |   |      |   |  |
| Querfurt               | 24   | 2    | 6    | 13   | 4    | 1 | 2    | 2    | 11   | 6    | 3    | 2    | 2.66 | 2 | 2 | 7  | 10 | 4  | 1 | 2.79 | 3 |  |
|                        | in % | 25   | 54.2 | 16.7 | 4.2  |   |      | 8.3  | 45.8 | 25   | 12.5 | 8.3  |      |   |   |    |    |    |   |      |   |  |
| Zeitz                  | 25   | 2    | 6    | 10   | 4    | 5 | 2    | 1    | 14   | 8    | 2    | 0    | 2.44 | 2 | 2 | 9  | 13 | 1  | 0 | 2.52 | 3 |  |
|                        | in % | 24   | 40   | 16   | 20   |   |      | 4    | 56   | 32   | 8    | 0    |      |   |   |    |    |    |   |      |   |  |
| Bayreuth               | 24   | 3    | 21   | 3    | 0    | 0 | 1    | 1    | 11   | 7    | 4    | 1    | 2.71 | 2 | 8 | 9  | 6  | 1  | 0 | 2.00 | 2 |  |
|                        | in % | 87.5 | 12.5 | 0    | 0    |   |      | 4.2  | 45.8 | 29.2 | 16.7 | 4.2  |      |   |   |    |    |    |   |      |   |  |
| Cottbus                | 26   | 4    | 15   | 6    | 3    | 2 | 1    | 2    | 9    | 11   | 4    | 0    | 2.65 | 3 | 3 | 2  | 11 | 10 | 0 | 3.08 | 3 |  |
|                        | in % | 57.7 | 23.1 | 11.5 | 7.7  |   |      | 7.7  | 34.6 | 42.3 | 15.4 | 0    |      |   |   |    |    |    |   |      |   |  |
| Elsterwerda            | 22   | 4    | 10   | 4    | 6    | 2 | 1    | 2    | 6    | 8    | 6    | 0    | 2.82 | 3 | 3 | 3  | 7  | 8  | 1 | 2.86 | 4 |  |

|             |      |      |      |      |      |   |     |      |      |      |      |     |      |   |   |    |    |   |   |      |   |  |
|-------------|------|------|------|------|------|---|-----|------|------|------|------|-----|------|---|---|----|----|---|---|------|---|--|
|             | in % | 45.5 | 18.2 | 27.3 | 9.1  |   | 9.1 | 27.3 | 36.4 | 27.3 | 0    |     |      |   |   |    |    |   |   |      |   |  |
| Görlitz     | 26   | 4    | 4    | 6    | 9    | 7 | 3   | 1    | 15   | 7    | 2    | 1   | 2.50 | 2 | 6 | 11 | 4  | 5 | 0 | 2.31 | 2 |  |
|             | in % | 15.4 | 23.1 | 34.6 | 26.9 |   |     | 3.9  | 57.7 | 26.9 | 7.7  | 3.9 |      |   |   |    |    |   |   |      |   |  |
| Hoyerswerda | 23   | 4    | 10   | 6    | 5    | 2 | 1   | 1    | 7    | 9    | 5    | 1   | 2.91 | 3 | 4 | 1  | 10 | 7 | 1 | 3.00 | 3 |  |
|             | in % | 43.5 | 26.1 | 21.7 | 8.7  |   |     | 4.3  | 30.4 | 39.1 | 21.7 | 4.3 |      |   |   |    |    |   |   |      |   |  |
| Delitzsch   | 30   | 5    | 5    | 7    | 12   | 6 | 3   | 3    | 11   | 10   | 5    | 1   | 2.66 | 2 | 7 | 8  | 11 | 4 | 0 | 2.40 | 3 |  |
|             | in % | 16.7 | 23.3 | 40   | 20   |   |     | 10   | 36.7 | 33.3 | 16.7 | 3.3 |      |   |   |    |    |   |   |      |   |  |
| Torgau      | 25   | 5    | 2    | 6    | 10   | 7 | 3   | 3    | 9    | 7    | 3    | 3   | 2.76 | 2 | 7 | 7  | 7  | 4 | 0 | 2.32 | * |  |
|             | in % | 8    | 24   | 40   | 28   |   |     | 12   | 36   | 28   | 12   | 12  |      |   |   |    |    |   |   |      |   |  |
| Gera        | 25   | 6    | 10   | 7    | 5    | 3 | 1   | 2    | 15   | 4    | 3    | 1   | 2.44 | 2 | 2 | 9  | 9  | 5 | 0 | 2.68 | * |  |
|             | in % | 40   | 28   | 20   | 12   |   |     | 8    | 60   | 16   | 12   | 4   |      |   |   |    |    |   |   |      |   |  |
| Jena        | 24   | 6    | 10   | 12   | 1    | 1 | 2   | 1    | 14   | 6    | 2    | 1   | 2.50 | 2 | 1 | 6  | 12 | 5 | 0 | 2.88 | 3 |  |
|             | in % | 41.7 | 50   | 4.2  | 4.2  |   |     | 4.2  | 58.3 | 25   | 8.3  | 4.2 |      |   |   |    |    |   |   |      |   |  |
| Weimar      | 26   | 6    | 13   | 12   | 0    | 1 | 1   | 1    | 16   | 6    | 2    | 1   | 2.46 | 2 | 1 | 7  | 10 | 8 | 0 | 2.96 | 3 |  |
|             | in % | 50   | 46.2 | 0    | 3.8  |   |     | 3.8  | 61.5 | 23.1 | 7.7  | 3.8 |      |   |   |    |    |   |   |      |   |  |
| Hof         | 24   | 7    | 20   | 3    | 0    | 1 | 1   | 1    | 12   | 6    | 4    | 1   | 2.66 | 2 | 9 | 8  | 5  | 2 | 0 | 2.00 | 1 |  |
|             | in % | 83.3 | 12.5 | 0    | 4.2  |   |     | 4.2  | 50   | 25   | 16.7 | 4.2 |      |   |   |    |    |   |   |      |   |  |

Tabelle 43: *Obersächsische Ausprägung, Gefallen und Korrektheit* der gültigen Städte der Nordgruppe



| Stadt                | typisches Obersächsisch | Stadt                  | typisches Obersächsisch |
|----------------------|-------------------------|------------------------|-------------------------|
| Dresden              | 112                     | Olbernhau              | 24                      |
| Leipzig              | 105                     | Zeitz                  | 24                      |
| Pirna                | 93                      | Altenburg              | 22                      |
| Meißen               | 91                      | Bischofswerda          | 21                      |
| Chemnitz             | 84                      | Markneukirchen         | 21                      |
| Grimma               | 80                      | Bad Gottleuba          | 20                      |
| Riesa                | 76                      | Merseburg              | 20                      |
| Freiberg             | 73                      | Bad Elster             | 19                      |
| Oschatz              | 67                      | Burgstädt              | 19                      |
| Zwickau              | 67                      | Hoyerswerda            | 18                      |
| Wurzen               | 65                      | Köthen                 | 18                      |
| Döbeln               | 64                      | Dessau                 | 16                      |
| Delitzsch            | 56                      | Weisswasser            | 16                      |
| Crimmitschau         | 55                      | Naumburg               | 15                      |
| Hohenstein-Ernstthal | 48                      | Schleiz                | 15                      |
| Schneeberg           | 48                      | Elsterwerda            | 14                      |
| Mittweida            | 47                      | Bad Brambach           | 12                      |
| Flöha                | 46                      | Cottbus                | 10                      |
| Großenhain           | 46                      | Bad Dürrenberg         | 9                       |
| Torgau               | 46                      | Bernburg               | 9                       |
| Annaberg-Buchholz    | 44                      | Gera                   | 9                       |
| Plauen               | 41                      | Greiz                  | 8                       |
| Sebnitz              | 40                      | Pößneck                | 8                       |
| Bautzen              | 38                      | Senftenberg            | 8                       |
| Rochlitz             | 38                      | Finsterwalde           | 7                       |
| Dippoldiswalde       | 36                      | Treuen                 | 6                       |
| Zittau               | 36                      | Hof                    | 5                       |
| Görlitz              | 34                      | Spremberg              | 5                       |
| Bitterfeld           | 32                      | Jena                   | 4                       |
| Johanngeorgenstadt   | 32                      | Lutherstadt-Wittenberg | 4                       |
| Kamenz               | 31                      | Weimar                 | 4                       |
| Altenberg            | 28                      | Lübbenau               | 3                       |
| Bad Düben            | 25                      | Querfurt               | 3                       |
| Halle                | 25                      | Herzberg               | 2                       |
| Seiffhennersdorf     | 25                      | Bamberg                | 1                       |
| Auerbach             | 24                      | Bayreuth               | 0                       |

Tabelle 44: Sortierte Städte, die „typisches“ Obersächsisch repräsentieren (alle Gruppen)

| Sub-<br>gruppe | Meißn.<br>Gr. | Lausitz.<br>Gr. | Osterl.<br>Gr. | Vogtl.-<br>Erz.-<br>Gr. | Thür.<br>Gr. | Nord-<br>Gr. | $\Sigma$ |
|----------------|---------------|-----------------|----------------|-------------------------|--------------|--------------|----------|
| 111            | 22            | 56              | 189            | 15                      | 21           | 33           | 345      |
| 112            | 14            | 5               | 105            | 41                      | 98           | 30           | 293      |
| 113            | 25            | 0               | 16             | 7                       | 26           | 7            | 81       |
| 114            | 78            | 47              | 125            | 126                     | 111          | 98           | 585      |
| 121            | 46            | 8               | 17             | 23                      | 23           | 50           | 167      |
| 122            | 18            | 45              | 92             | 0                       | 22           | 0            | 177      |
| 123            | 183           | 184             | 406            | 336                     | 314          | 168          | 1591     |
| 124            | 0             | 0               | 0              | 0                       | 0            | 0            | 0        |
| 131            | 2             | 20              | 36             | 0                       | 0            | 23           | 81       |
| 132            | 306           | 359             | 453            | 225                     | 187          | 250          | 1780     |
| 133            | 35            | 35              | 46             | 19                      | 19           | 41           | 195      |
| 141            | 0             | 36              | 19             | 0                       | 15           | 0            | 70       |
| 142            | 296           | 441             | 382            | 171                     | 195          | 164          | 1649     |
| 210            | 10            | 38              | 0              | 0                       | 0            | 33           | 81       |
| 220            | 68            | 122             | 137            | 151                     | 70           | 39           | 587      |
| 230            | 36            | 139             | 10             | 10                      | 4            | 81           | 280      |
| 240            | 4             | 11              | 15             | 0                       | 12           | 0            | 42       |
| 311            | 98            | 72              | 83             | 92                      | 60           | 74           | 479      |
| 312            | 218           | 120             | 266            | 347                     | 160          | 358          | 1469     |
| 313            | 2             | 19              | 43             | 21                      | 37           | 51           | 173      |
| 321            | 267           | 394             | 571            | 508                     | 205          | 413          | 2358     |
| 411            | 26            | 77              | 400            | 99                      | 103          | 149          | 854      |
| 412            | 189           | 227             | 334            | 150                     | 287          | 145          | 1332     |
| 413            | 13            | 6               | 68             | 11                      | 11           | 10           | 119      |
| 414            | 63            | 232             | 500            | 275                     | 253          | 258          | 1581     |
| 415            | 20            | 0               | 54             | 8                       | 33           | 41           | 156      |
| 421            | 0             | 4               | 4              | 0                       | 0            | 6            | 14       |
| 422            | 274           | 221             | 267            | 98                      | 256          | 288          | 1404     |
| 431            | 113           | 165             | 90             | 57                      | 62           | 125          | 612      |
| 432            | 720           | 809             | 1133           | 1169                    | 954          | 1062         | 5847     |
| 441            | 162           | 156             | 561            | 173                     | 311          | 274          | 1637     |
| 442            | 130           | 160             | 151            | 90                      | 125          | 262          | 918      |
| Summe          | 3438          | 4208            | 6573           | 4222                    | 3974         | 4533         | 26948    |

Tabelle 45: Benennungshäufigkeit der assoziierten Merkmale insgesamt, sortiert nach ihren Merkmalssubgruppen

| Sub-<br>gruppe | Meißn.<br>Gr. | Lausitz.<br>Gr. | Osterl.<br>Gr. | Vogtl.-<br>Erz.-<br>Gr. | Thür.<br>Gr. | Nord-<br>Gr. | $\Sigma$ |
|----------------|---------------|-----------------|----------------|-------------------------|--------------|--------------|----------|
| 111            | 18            | 47              | 182            | 15                      | 18           | 22           | 302      |
| 112            | 9             | 4               | 78             | 34                      | 74           | 22           | 221      |
| 113            | 19            | 0               | 8              | 7                       | 22           | 4            | 60       |
| 114            | 51            | 37              | 97             | 113                     | 76           | 75           | 449      |
| 121            | 28            | 8               | 13             | 19                      | 19           | 38           | 125      |
| 122            | 16            | 36              | 76             | 0                       | 20           | 0            | 146      |
| 123            | 131           | 147             | 293            | 259                     | 234          | 136          | 1200     |
| 124            | 0             | 0               | 0              | 0                       | 0            | 0            | 0        |
| 131            | 2             | 15              | 19             | 0                       | 0            | 15           | 51       |
| 132            | 228           | 269             | 346            | 191                     | 121          | 194          | 1349     |
| 133            | 27            | 26              | 31             | 13                      | 18           | 25           | 140      |
| 141            | 0             | 31              | 13             | 0                       | 13           | 0            | 57       |
| 142            | 205           | 336             | 297            | 149                     | 152          | 131          | 1270     |
| 210            | 7             | 35              | 0              | 0                       | 0            | 26           | 68       |
| 220            | 41            | 100             | 109            | 130                     | 48           | 20           | 448      |
| 230            | 23            | 121             | 8              | 5                       | 3            | 72           | 232      |
| 240            | 4             | 9               | 11             | 0                       | 9            | 0            | 33       |
| 311            | 80            | 47              | 65             | 83                      | 48           | 59           | 382      |
| 312            | 155           | 92              | 212            | 276                     | 118          | 244          | 1097     |
| 313            | 2             | 17              | 26             | 18                      | 23           | 28           | 114      |
| 321            | 198           | 333             | 453            | 409                     | 142          | 331          | 1866     |
| 411            | 16            | 65              | 323            | 84                      | 66           | 100          | 654      |
| 412            | 109           | 165             | 234            | 117                     | 199          | 106          | 930      |
| 413            | 7             | 2               | 42             | 8                       | 8            | 7            | 74       |
| 414            | 46            | 193             | 360            | 214                     | 162          | 178          | 1153     |
| 415            | 16            | 0               | 31             | 3                       | 22           | 21           | 93       |
| 421            | 0             | 4               | 4              | 0                       | 0            | 3            | 11       |
| 422            | 175           | 174             | 182            | 82                      | 199          | 213          | 1025     |
| 431            | 58            | 145             | 47             | 43                      | 42           | 84           | 419      |
| 432            | 463           | 578             | 734            | 876                     | 682          | 690          | 4023     |
| 441            | 111           | 121             | 326            | 116                     | 191          | 146          | 1011     |
| 442            | 83            | 114             | 90             | 63                      | 91           | 161          | 602      |
| Summe          | 2328          | 3271            | 4710           | 3327                    | 2820         | 3151         | 19607    |

Tabelle 46: Benennungshäufigkeiten der assoziierten Merkmale der gültigen Städte, sortiert nach ihren Merkmalsgruppen

| Subgruppe | C 1 | C 2 | C 3 | C 4 | C 5 | C 6 | C 7 | C 8 | C 9 | C 10 | $\Sigma$ |
|-----------|-----|-----|-----|-----|-----|-----|-----|-----|-----|------|----------|
| 111       | 9   | 8   | 1   | 0   | 0   | 0   | 0   | 0   | 0   | 0    | 18       |
| 112       | 0   | 2   | 0   | 0   | 5   | 2   | 0   | 0   | 0   | 0    | 9        |
| 113       | 1   | 9   | 4   | 0   | 4   | 1   | 0   | 0   | 0   | 0    | 19       |
| 114       | 19  | 22  | 1   | 0   | 0   | 8   | 0   | 1   | 0   | 0    | 51       |
| 121       | 12  | 2   | 4   | 0   | 6   | 0   | 0   | 2   | 0   | 2    | 28       |
| 122       | 6   | 4   | 4   | 0   | 1   | 1   | 0   | 0   | 0   | 0    | 16       |
| 123       | 26  | 8   | 57  | 1   | 10  | 20  | 1   | 4   | 1   | 3    | 131      |
| 124       | 0   | 0   | 0   | 0   | 0   | 0   | 0   | 0   | 0   | 0    | 0        |
| 131       | 0   | 0   | 0   | 1   | 0   | 0   | 0   | 0   | 1   | 0    | 2        |
| 132       | 43  | 97  | 24  | 0   | 12  | 33  | 15  | 3   | 0   | 1    | 228      |
| 133       | 4   | 5   | 10  | 1   | 1   | 2   | 1   | 1   | 0   | 2    | 27       |
| 141       | 0   | 0   | 0   | 0   | 0   | 0   | 0   | 0   | 0   | 0    | 0        |
| 142       | 52  | 82  | 14  | 6   | 5   | 25  | 7   | 3   | 6   | 5    | 205      |
| 210       | 0   | 0   | 0   | 0   | 5   | 2   | 0   | 0   | 0   | 0    | 7        |
| 220       | 24  | 3   | 1   | 0   | 0   | 13  | 0   | 0   | 0   | 0    | 41       |
| 230       | 0   | 12  | 7   | 0   | 3   | 0   | 0   | 1   | 0   | 0    | 23       |
| 240       | 4   | 0   | 0   | 0   | 0   | 0   | 0   | 0   | 0   | 0    | 4        |
| 311       | 29  | 38  | 4   | 0   | 2   | 4   | 3   | 0   | 0   | 0    | 80       |
| 312       | 75  | 35  | 10  | 1   | 7   | 2   | 20  | 2   | 0   | 3    | 155      |
| 313       | 0   | 2   | 0   | 0   | 0   | 0   | 0   | 0   | 0   | 0    | 2        |
| 321       | 58  | 33  | 39  | 2   | 19  | 35  | 0   | 6   | 1   | 5    | 198      |
| 411       | 5   | 3   | 0   | 0   | 2   | 5   | 0   | 1   | 0   | 0    | 16       |
| 412       | 23  | 23  | 3   | 1   | 17  | 29  | 3   | 4   | 2   | 4    | 109      |
| 413       | 0   | 4   | 0   | 0   | 0   | 3   | 0   | 0   | 0   | 0    | 7        |
| 414       | 15  | 4   | 4   | 1   | 13  | 6   | 1   | 0   | 2   | 0    | 46       |
| 415       | 3   | 6   | 7   | 0   | 0   | 0   | 0   | 0   | 0   | 0    | 16       |
| 421       | 0   | 0   | 0   | 0   | 0   | 0   | 0   | 0   | 0   | 0    | 0        |
| 422       | 56  | 43  | 9   | 5   | 11  | 25  | 10  | 2   | 5   | 9    | 175      |
| 431       | 19  | 8   | 0   | 2   | 18  | 4   | 0   | 3   | 2   | 2    | 58       |
| 432       | 82  | 140 | 46  | 16  | 80  | 26  | 38  | 10  | 16  | 9    | 463      |
| 441       | 9   | 39  | 11  | 4   | 33  | 7   | 3   | 2   | 2   | 1    | 111      |
| 442       | 14  | 17  | 15  | 0   | 24  | 7   | 3   | 2   | 0   | 1    | 83       |
| Summe     | 588 | 649 | 275 | 41  | 278 | 260 | 105 | 47  | 38  | 47   | 2328     |

Tabelle 47: Benennungshäufigkeiten der meißnischen Gruppe, sortiert nach Merkmalssubgruppen und Clustern

| Subgruppe | C 1 | C 2 | C 3 | C 4 | C 5 | C 6 | C 7 | $\Sigma$ |
|-----------|-----|-----|-----|-----|-----|-----|-----|----------|
| 111       | 11  | 17  | 10  | 4   | 5   | 0   | 0   | 47       |
| 112       | 4   | 0   | 0   | 0   | 0   | 0   | 0   | 4        |
| 113       | 0   | 0   | 0   | 0   | 0   | 0   | 0   | 0        |
| 114       | 11  | 7   | 6   | 0   | 10  | 3   | 0   | 37       |
| 121       | 1   | 0   | 6   | 0   | 1   | 0   | 0   | 8        |
| 122       | 5   | 15  | 6   | 0   | 7   | 3   | 0   | 36       |
| 123       | 11  | 42  | 59  | 12  | 20  | 2   | 1   | 147      |
| 124       | 0   | 0   | 0   | 0   | 0   | 0   | 0   | 0        |
| 131       | 3   | 4   | 5   | 0   | 2   | 1   | 0   | 15       |
| 132       | 93  | 48  | 16  | 20  | 71  | 18  | 3   | 269      |
| 133       | 5   | 6   | 2   | 0   | 9   | 3   | 1   | 26       |
| 141       | 4   | 12  | 1   | 3   | 6   | 5   | 0   | 31       |
| 142       | 72  | 103 | 26  | 37  | 80  | 13  | 5   | 336      |
| 210       | 0   | 1   | 3   | 29  | 2   | 0   | 0   | 35       |
| 220       | 8   | 21  | 24  | 19  | 25  | 2   | 1   | 100      |
| 230       | 0   | 6   | 8   | 103 | 4   | 0   | 0   | 121      |
| 240       | 6   | 2   | 0   | 0   | 1   | 0   | 0   | 9        |
| 311       | 20  | 3   | 8   | 4   | 10  | 2   | 0   | 47       |
| 312       | 5   | 29  | 16  | 23  | 5   | 13  | 1   | 92       |
| 313       | 3   | 6   | 1   | 0   | 7   | 0   | 0   | 17       |
| 321       | 44  | 83  | 43  | 102 | 49  | 8   | 4   | 333      |
| 411       | 4   | 13  | 17  | 14  | 9   | 6   | 2   | 65       |
| 412       | 47  | 24  | 8   | 51  | 24  | 10  | 1   | 165      |
| 413       | 0   | 0   | 0   | 0   | 0   | 2   | 0   | 2        |
| 414       | 36  | 53  | 18  | 11  | 62  | 9   | 4   | 193      |
| 415       | 0   | 0   | 0   | 0   | 0   | 0   | 0   | 0        |
| 421       | 4   | 0   | 0   | 0   | 0   | 0   | 0   | 4        |
| 422       | 32  | 47  | 15  | 27  | 35  | 17  | 1   | 174      |
| 431       | 5   | 18  | 18  | 84  | 17  | 2   | 1   | 145      |
| 432       | 96  | 107 | 81  | 135 | 67  | 79  | 13  | 578      |
| 441       | 24  | 19  | 29  | 20  | 19  | 9   | 1   | 121      |
| 442       | 6   | 21  | 18  | 46  | 11  | 9   | 3   | 114      |
| Summe     | 560 | 707 | 444 | 744 | 558 | 216 | 42  | 3271     |

Tabelle 48: Benennungshäufigkeiten der lausitzischen Gruppe, sortiert nach Merkmalssubgruppen und Clustern

| Subgruppe | C 1 | C 2 | C 3  | C 4 | C 5 | C 6 | C 7 | $\Sigma$ |
|-----------|-----|-----|------|-----|-----|-----|-----|----------|
| 111       | 6   | 11  | 151  | 10  | 0   | 4   | 0   | 182      |
| 112       | 9   | 12  | 43   | 6   | 0   | 8   | 0   | 78       |
| 113       | 0   | 3   | 3    | 0   | 1   | 0   | 1   | 8        |
| 114       | 5   | 17  | 68   | 3   | 1   | 2   | 1   | 97       |
| 121       | 2   | 0   | 8    | 3   | 0   | 0   | 0   | 13       |
| 122       | 8   | 1   | 50   | 3   | 0   | 14  | 0   | 76       |
| 123       | 20  | 23  | 144  | 43  | 6   | 51  | 6   | 293      |
| 124       | 0   | 0   | 0    | 0   | 0   | 0   | 0   | 0        |
| 131       | 0   | 5   | 6    | 4   | 0   | 4   | 0   | 19       |
| 132       | 31  | 37  | 221  | 17  | 1   | 39  | 0   | 346      |
| 133       | 4   | 5   | 4    | 9   | 0   | 9   | 0   | 31       |
| 141       | 0   | 0   | 11   | 2   | 0   | 0   | 0   | 13       |
| 142       | 30  | 40  | 163  | 23  | 6   | 29  | 6   | 297      |
| 210       | 0   | 0   | 0    | 0   | 0   | 0   | 0   | 0        |
| 220       | 2   | 23  | 77   | 4   | 1   | 1   | 1   | 109      |
| 230       | 0   | 0   | 4    | 0   | 0   | 4   | 0   | 8        |
| 240       | 0   | 0   | 8    | 1   | 1   | 0   | 1   | 11       |
| 311       | 4   | 21  | 29   | 6   | 1   | 3   | 1   | 65       |
| 312       | 30  | 26  | 108  | 25  | 3   | 17  | 3   | 212      |
| 313       | 0   | 23  | 2    | 1   | 0   | 0   | 0   | 26       |
| 321       | 22  | 53  | 292  | 21  | 0   | 65  | 0   | 453      |
| 411       | 8   | 59  | 230  | 13  | 2   | 9   | 2   | 323      |
| 412       | 12  | 15  | 81   | 19  | 2   | 104 | 1   | 234      |
| 413       | 0   | 0   | 0    | 2   | 20  | 0   | 20  | 42       |
| 414       | 14  | 36  | 162  | 23  | 1   | 124 | 0   | 360      |
| 415       | 0   | 17  | 7    | 5   | 1   | 0   | 1   | 31       |
| 421       | 0   | 0   | 4    | 0   | 0   | 0   | 0   | 4        |
| 422       | 12  | 43  | 87   | 18  | 3   | 15  | 4   | 182      |
| 431       | 9   | 4   | 19   | 10  | 0   | 5   | 0   | 47       |
| 432       | 105 | 139 | 292  | 64  | 20  | 93  | 21  | 734      |
| 441       | 27  | 84  | 40   | 41  | 8   | 118 | 8   | 326      |
| 442       | 10  | 21  | 32   | 10  | 3   | 11  | 3   | 90       |
| Summe     | 370 | 718 | 2346 | 386 | 81  | 729 | 80  | 4710     |

Tabelle 49: Benennungshäufigkeiten der osterländischen Gruppe, sortiert nach Merkmalssubgruppen und Clustern

| Subgruppe | C 1 | C 2 | C 3 | C 4 | C 5 | C 6 | C 7 | C 8 | C 9 | $\Sigma$ |
|-----------|-----|-----|-----|-----|-----|-----|-----|-----|-----|----------|
| 111       | 4   | 0   | 0   | 0   | 0   | 9   | 2   | 0   | 0   | 15       |
| 112       | 5   | 4   | 1   | 0   | 6   | 4   | 14  | 0   | 0   | 34       |
| 113       | 0   | 0   | 4   | 3   | 0   | 0   | 0   | 0   | 0   | 7        |
| 114       | 13  | 17  | 26  | 0   | 3   | 31  | 21  | 0   | 2   | 113      |
| 121       | 0   | 6   | 1   | 3   | 2   | 0   | 7   | 0   | 0   | 19       |
| 122       | 0   | 0   | 0   | 0   | 0   | 0   | 0   | 0   | 0   | 0        |
| 123       | 14  | 56  | 14  | 19  | 56  | 51  | 43  | 2   | 4   | 259      |
| 124       | 0   | 0   | 0   | 0   | 0   | 0   | 0   | 0   | 0   | 0        |
| 131       | 0   | 0   | 0   | 0   | 0   | 0   | 0   | 0   | 0   | 0        |
| 132       | 12  | 22  | 53  | 8   | 8   | 24  | 50  | 7   | 7   | 191      |
| 133       | 0   | 0   | 4   | 0   | 4   | 0   | 5   | 0   | 0   | 13       |
| 141       | 0   | 0   | 0   | 0   | 0   | 0   | 0   | 0   | 0   | 0        |
| 142       | 23  | 12  | 12  | 9   | 12  | 49  | 32  | 0   | 0   | 149      |
| 210       | 0   | 0   | 0   | 0   | 0   | 0   | 0   | 0   | 0   | 0        |
| 220       | 29  | 18  | 0   | 3   | 7   | 59  | 13  | 0   | 1   | 130      |
| 230       | 0   | 3   | 0   | 0   | 0   | 0   | 0   | 0   | 2   | 5        |
| 240       | 0   | 0   | 0   | 0   | 0   | 0   | 0   | 0   | 0   | 0        |
| 311       | 32  | 3   | 24  | 6   | 2   | 11  | 1   | 2   | 2   | 83       |
| 312       | 17  | 33  | 24  | 12  | 27  | 62  | 79  | 10  | 12  | 276      |
| 313       | 13  | 2   | 2   | 0   | 0   | 0   | 0   | 0   | 1   | 18       |
| 321       | 73  | 57  | 75  | 8   | 24  | 116 | 41  | 2   | 13  | 409      |
| 411       | 7   | 6   | 33  | 0   | 12  | 14  | 2   | 4   | 6   | 84       |
| 412       | 0   | 27  | 5   | 3   | 4   | 31  | 38  | 5   | 4   | 117      |
| 413       | 0   | 1   | 1   | 3   | 0   | 0   | 0   | 1   | 2   | 8        |
| 414       | 19  | 58  | 25  | 5   | 8   | 45  | 34  | 8   | 12  | 214      |
| 415       | 0   | 0   | 1   | 0   | 0   | 0   | 0   | 2   | 0   | 3        |
| 421       | 0   | 0   | 0   | 0   | 0   | 0   | 0   | 0   | 0   | 0        |
| 422       | 0   | 11  | 8   | 5   | 4   | 34  | 16  | 1   | 3   | 82       |
| 431       | 2   | 10  | 4   | 2   | 4   | 10  | 6   | 1   | 4   | 43       |
| 432       | 128 | 74  | 178 | 90  | 103 | 123 | 84  | 45  | 51  | 876      |
| 441       | 5   | 15  | 20  | 10  | 45  | 12  | 4   | 1   | 4   | 116      |
| 442       | 1   | 8   | 5   | 0   | 14  | 27  | 5   | 2   | 1   | 63       |
| Summe     | 397 | 443 | 520 | 189 | 345 | 712 | 497 | 93  | 131 | 3327     |

Tabelle 50: Benennungshäufigkeiten der vogtl.-erzgeb. Gruppe, sortiert nach Merkmalssubgruppen und Clustern

| Subgruppe | C 1 | C 2 | C 3 | C 4 | C 5 | $\Sigma$ |
|-----------|-----|-----|-----|-----|-----|----------|
| 111       | 15  | 0   | 0   | 0   | 3   | 18       |
| 112       | 20  | 13  | 5   | 26  | 10  | 74       |
| 113       | 5   | 5   | 6   | 6   | 0   | 22       |
| 114       | 27  | 17  | 6   | 20  | 6   | 76       |
| 121       | 0   | 4   | 3   | 12  | 0   | 19       |
| 122       | 0   | 3   | 2   | 12  | 3   | 20       |
| 123       | 41  | 28  | 30  | 85  | 50  | 234      |
| 124       | 0   | 0   | 0   | 0   | 0   | 0        |
| 131       | 0   | 0   | 0   | 0   | 0   | 0        |
| 132       | 28  | 18  | 7   | 61  | 7   | 121      |
| 133       | 3   | 1   | 4   | 4   | 6   | 18       |
| 141       | 0   | 2   | 0   | 9   | 2   | 13       |
| 142       | 42  | 17  | 15  | 62  | 16  | 152      |
| 210       | 0   | 0   | 0   | 0   | 0   | 0        |
| 220       | 11  | 9   | 4   | 18  | 6   | 48       |
| 230       | 0   | 0   | 3   | 0   | 0   | 3        |
| 240       | 8   | 1   | 0   | 0   | 0   | 9        |
| 311       | 15  | 9   | 9   | 14  | 1   | 48       |
| 312       | 52  | 7   | 4   | 32  | 23  | 118      |
| 313       | 2   | 11  | 0   | 3   | 7   | 23       |
| 321       | 32  | 25  | 4   | 39  | 42  | 142      |
| 411       | 21  | 9   | 9   | 18  | 9   | 66       |
| 412       | 28  | 46  | 23  | 89  | 13  | 199      |
| 413       | 1   | 1   | 0   | 6   | 0   | 8        |
| 414       | 35  | 27  | 15  | 64  | 21  | 162      |
| 415       | 11  | 4   | 1   | 6   | 0   | 22       |
| 421       | 0   | 0   | 0   | 0   | 0   | 0        |
| 422       | 34  | 34  | 7   | 103 | 21  | 199      |
| 431       | 14  | 3   | 0   | 19  | 6   | 42       |
| 432       | 184 | 111 | 82  | 193 | 112 | 682      |
| 441       | 30  | 37  | 33  | 61  | 30  | 191      |
| 442       | 29  | 16  | 6   | 33  | 7   | 91       |
| Summe     | 688 | 458 | 278 | 995 | 401 | 2820     |

Tabelle 51: Benennungshäufigkeiten der thüringischen Gruppe, sortiert nach Merkmalssubgruppen und Clustern



| Subgruppe | C 1  | C 2  | C 3 | C 4 | C 5 | C 6 | C 7 | $\Sigma$ |
|-----------|------|------|-----|-----|-----|-----|-----|----------|
| 111       | 7    | 10   | 0   | 1   | 2   | 1   | 1   | 22       |
| 112       | 14   | 0    | 0   | 6   | 2   | 0   | 0   | 22       |
| 113       | 0    | 0    | 2   | 0   | 0   | 0   | 2   | 4        |
| 114       | 35   | 27   | 0   | 5   | 6   | 1   | 1   | 75       |
| 121       | 23   | 12   | 0   | 1   | 2   | 0   | 0   | 38       |
| 122       | 0    | 0    | 0   | 0   | 0   | 0   | 0   | 0        |
| 123       | 49   | 61   | 6   | 7   | 5   | 2   | 6   | 136      |
| 124       | 0    | 0    | 0   | 0   | 0   | 0   | 0   | 0        |
| 131       | 11   | 0    | 1   | 2   | 0   | 0   | 1   | 15       |
| 132       | 116  | 49   | 3   | 4   | 11  | 8   | 3   | 194      |
| 133       | 20   | 1    | 0   | 3   | 0   | 1   | 0   | 25       |
| 141       | 0    | 0    | 0   | 0   | 0   | 0   | 0   | 0        |
| 142       | 56   | 51   | 5   | 1   | 3   | 9   | 6   | 131      |
| 210       | 11   | 11   | 0   | 1   | 3   | 0   | 0   | 26       |
| 220       | 6    | 6    | 2   | 1   | 1   | 2   | 2   | 20       |
| 230       | 17   | 45   | 0   | 3   | 7   | 0   | 0   | 72       |
| 240       | 0    | 0    | 0   | 0   | 0   | 0   | 0   | 0        |
| 311       | 21   | 23   | 2   | 4   | 2   | 5   | 2   | 59       |
| 312       | 125  | 61   | 4   | 16  | 6   | 25  | 7   | 244      |
| 313       | 26   | 0    | 0   | 2   | 0   | 0   | 0   | 28       |
| 321       | 123  | 157  | 0   | 25  | 20  | 4   | 2   | 331      |
| 411       | 50   | 32   | 1   | 3   | 7   | 6   | 1   | 100      |
| 412       | 41   | 36   | 1   | 10  | 6   | 11  | 1   | 106      |
| 413       | 3    | 1    | 2   | 0   | 0   | 0   | 1   | 7        |
| 414       | 91   | 60   | 2   | 10  | 3   | 10  | 2   | 178      |
| 415       | 2    | 12   | 0   | 6   | 1   | 0   | 0   | 21       |
| 421       | 2    | 0    | 0   | 1   | 0   | 0   | 0   | 3        |
| 422       | 113  | 68   | 3   | 9   | 12  | 5   | 3   | 213      |
| 431       | 14   | 42   | 2   | 8   | 4   | 12  | 2   | 84       |
| 432       | 236  | 251  | 19  | 73  | 37  | 56  | 18  | 690      |
| 441       | 43   | 44   | 7   | 25  | 7   | 11  | 9   | 146      |
| 442       | 68   | 45   | 2   | 17  | 10  | 17  | 2   | 161      |
| Summe     | 1323 | 1105 | 64  | 244 | 157 | 186 | 72  | 3151     |

Tabelle 52: Benennungshäufigkeiten der Nordgruppe, sortiert nach Merkmalssubgruppen und Clustern

| Subgruppe       | Meißn.<br>Gr. | Lausitz.<br>Gr. | Osterl.<br>Gr. | Vogtl.-<br>Erzg.<br>Gr. | Thür.<br>Gr. | Nord-<br>Gr. | $\Sigma$ |        |
|-----------------|---------------|-----------------|----------------|-------------------------|--------------|--------------|----------|--------|
| 111             | 22            | 56              | 189            | 15                      | 21           | 33           | 336      |        |
| 112             | 14            | 5               | 105            | 41                      | 98           | 30           | 293      |        |
| 113             | 25            | 0               | 16             | 7                       | 26           | 7            | 81       |        |
| 114             | 78            | 47              | 125            | 126                     | 111          | 98           | 585      |        |
| 121             | 46            | 8               | 17             | 23                      | 23           | 50           | 167      |        |
| 122             | 18            | 45              | 92             | 0                       | 22           | 0            | 177      |        |
| 123             | 183           | 184             | 406            | 336                     | 314          | 168          | 1591     |        |
| 131             | 2             | 20              | 36             | 0                       | 0            | 23           | 81       |        |
| 132             | 306           | 359             | 453            | 225                     | 187          | 250          | 1780     |        |
| 133             | 35            | 35              | 46             | 19                      | 19           | 41           | 195      |        |
| 141             | 0             | 36              | 19             | 0                       | 15           | 0            | 70       |        |
| 142             | 296           | 441             | 382            | 171                     | 195          | 164          | 1649     |        |
| 210             | 10            | 38              | 0              | 0                       | 0            | 33           | 81       |        |
| 220             | 68            | 122             | 137            | 151                     | 70           | 39           | 587      |        |
| 230             | 36            | 139             | 10             | 10                      | 4            | 81           | 280      |        |
| 240             | 4             | 11              | 15             | 0                       | 12           | 0            | 42       |        |
| 311             | 98            | 72              | 83             | 92                      | 60           | 74           | 479      |        |
| 312             | 218           | 120             | 266            | 347                     | 160          | 358          | 1469     |        |
| 313             | 2             | 19              | 43             | 21                      | 37           | 51           | 173      |        |
| 321             | 267           | 394             | 571            | 508                     | 205          | 413          | 2358     |        |
| 411             | 26            | 77              | 400            | 99                      | 103          | 149          | 854      |        |
| 412             | 189           | 227             | 334            | 150                     | 287          | 145          | 1332     |        |
| 413             | 13            | 6               | 68             | 11                      | 11           | 10           | 119      |        |
| 414             | 63            | 232             | 500            | 275                     | 253          | 258          | 1581     |        |
| 415             | 20            | 0               | 54             | 8                       | 33           | 41           | 156      |        |
| 421             | 0             | 4               | 4              | 0                       | 0            | 6            | 14       |        |
| 422             | 274           | 221             | 267            | 98                      | 256          | 288          | 1404     |        |
| 431             | 113           | 165             | 90             | 57                      | 62           | 125          | 612      |        |
| 432             | 720           | 809             | 1133           | 1169                    | 954          | 1062         | 5847     |        |
| 441             | 162           | 156             | 561            | 173                     | 311          | 274          | 1637     |        |
| 442             | 130           | 160             | 151            | 90                      | 125          | 262          | 918      |        |
| Summe (absolut) | 3438          | 4208            | 6573           | 4222                    | 3974         | 4533         | 26948    |        |
| Summe (relativ) | 2328          | 3283            | 4710           | 3327                    | 2823         | 3150         | 19621    | 72.80% |

Tabelle 53: Benennungshäufigkeiten der assoziierten Merkmale insgesamt (ohne Clusterauswahl)

| Subgruppe       | Meißn.<br>Gr. | Lausitz.<br>Gr. | Osterl.<br>Gr. | Vogtl.-<br>Erzg.<br>Gr. | Thür.<br>Gr. | Nord-<br>Gr. | $\Sigma$ |        |
|-----------------|---------------|-----------------|----------------|-------------------------|--------------|--------------|----------|--------|
| 111             | 18            | 47              | 182            | 15                      | 18           | 22           | 302      |        |
| 112             | 9             | 4               | 77             | 34                      | 81           | 22           | 227      |        |
| 113             | 19            | 0               | 8              | 7                       | 22           | 4            | 60       |        |
| 114             | 51            | 37              | 97             | 113                     | 69           | 78           | 445      |        |
| 121             | 24            | 9               | 13             | 19                      | 19           | 38           | 122      |        |
| 122             | 16            | 36              | 76             | 0                       | 18           | 0            | 146      |        |
| 123             | 135           | 156             | 289            | 259                     | 234          | 136          | 1209     |        |
| 131             | 2             | 15              | 19             | 0                       | 0            | 15           | 51       |        |
| 132             | 232           | 268             | 348            | 191                     | 121          | 194          | 1354     |        |
| 133             | 26            | 26              | 31             | 13                      | 18           | 22           | 136      |        |
| 141             | 0             | 31              | 13             | 0                       | 13           | 0            | 57       |        |
| 142             | 213           | 348             | 304            | 137                     | 163          | 128          | 1293     |        |
| 210             | 7             | 35              | 0              | 0                       | 0            | 26           | 68       |        |
| 220             | 33            | 102             | 102            | 142                     | 37           | 20           | 436      |        |
| 230             | 23            | 120             | 8              | 5                       | 3            | 71           | 230      |        |
| 240             | 4             | 9               | 11             | 0                       | 9            | 0            | 33       |        |
| 311             | 80            | 47              | 65             | 83                      | 48           | 59           | 382      |        |
| 312             | 155           | 98              | 212            | 276                     | 118          | 244          | 1103     |        |
| 313             | 2             | 17              | 26             | 18                      | 23           | 46           | 132      |        |
| 321             | 198           | 333             | 453            | 409                     | 142          | 331          | 1866     |        |
| 411             | 4             | 59              | 323            | 84                      | 66           | 96           | 632      |        |
| 412             | 113           | 165             | 234            | 121                     | 199          | 105          | 937      |        |
| 413             | 7             | 2               | 42             | 8                       | 8            | 7            | 74       |        |
| 414             | 47            | 184             | 360            | 209                     | 162          | 157          | 1119     |        |
| 415             | 16            | 0               | 31             | 3                       | 22           | 21           | 93       |        |
| 421             | 0             | 4               | 4              | 0                       | 0            | 3            | 11       |        |
| 422             | 171           | 174             | 181            | 83                      | 198          | 212          | 1019     |        |
| 431             | 114           | 143             | 46             | 43                      | 44           | 83           | 473      |        |
| 432             | 419           | 621             | 741            | 876                     | 687          | 704          | 4048     |        |
| 441             | 113           | 109             | 340            | 116                     | 190          | 145          | 1013     |        |
| 442             | 77            | 84              | 74             | 63                      | 91           | 161          | 550      |        |
| Summe (relativ) | 2328          | 3283            | 4710           | 3327                    | 2823         | 3150         | 19621    | 72.80% |
| Summe (absolut) | 3438          | 4208            | 6573           | 4222                    | 3974         | 4533         | 26948    |        |

Tabelle 54: Benennungshäufigkeiten der assoziierten Merkmale der gültigen Städtecluster

| Sub-<br>gruppe | Meißn.<br>Gr.                                                                        | Punkt-<br>wert             | Lausitz.<br>Gr.                                                                                                   | Punkt-<br>wert              |
|----------------|--------------------------------------------------------------------------------------|----------------------------|-------------------------------------------------------------------------------------------------------------------|-----------------------------|
| 123            | rollendes R<br>k > g<br>-ig > -ich<br>[k] weich<br>[p] weich                         | 75<br>26<br>8<br>4<br>4    | rollendes R<br>k > g<br>g > j<br>p > b<br>ch > sch                                                                | 77<br>49<br>12<br>8<br>4    |
| 132            | SINGEN                                                                               | 232                        | SINGEN<br>geleiert<br>am Ende des Satzes<br>Stimme hoch                                                           | 236<br>23<br>9              |
| 142            | unverständlich<br>langgezogen<br>verkürzt<br>verständlich<br>läuft extrem heraus     | 69<br>52<br>50<br>22<br>7  | langgezogen<br>unverständlich<br>deutlich<br>plärren/ quäken<br>Unterkiefer runter                                | 134<br>87<br>53<br>25<br>24 |
| 321            | Drä:sdn<br>icken<br>ni (nicht)<br>nu dann<br>biste (bist du)                         | 21<br>16<br>9<br>9<br>8    | ne (eine)<br>och (auch)<br>habsch (habe ich)<br>nüsch (nicht)<br>mai Gudster                                      | 32<br>30<br>23<br>23<br>22  |
| 432            | Erzgebirgisch<br>Sächsisch<br>Thüringisch<br>Dresdner Sächsisch<br>Lausitzer Dialekt | 63<br>60<br>45<br>39<br>23 | Sächsisch<br>Thüringisch<br>Erzgebirgisch<br>Berlinerisch<br>Lausitzer Einschlag                                  | 91<br>65<br>49<br>43<br>32  |
| 220            | -                                                                                    | -                          | -                                                                                                                 | -                           |
| 230            | -                                                                                    | -                          | mir/mich verwechseln<br>mits Fahrrad fahren<br>bei den Fleischer<br>Dativ/Akkusativ verwechselt<br>mit die Kinder | 67<br>19<br>7<br>7<br>7     |
| 312            | nu (ja)<br>gäll/ gälle (nicht wahr?)<br>nuja<br>gä (nicht wahr?)<br>Glück auf        | 54<br>36<br>17<br>8<br>8   | -                                                                                                                 | -                           |
| 411            | -                                                                                    | -                          | -                                                                                                                 | -                           |
| 412            | weich<br>breit<br>hart<br>grob<br>herb                                               | 40<br>21<br>19<br>6<br>6   | warm<br>hart<br>weich<br>derb<br>breit                                                                            | 47<br>40<br>25<br>13<br>12  |
| 414            | -                                                                                    | -                          | man hört es<br>wie <i>Person xyz</i><br>schwer erkennbar<br>Heimat                                                | 160<br>12<br>7<br>5         |
| 422            | unangenehm<br>angenehm<br>dörflicher Klang                                           | 101<br>63<br>7             | unangenehm<br>angenehm                                                                                            | 95<br>79                    |

|     |                                                                                                    |                           |                                        |          |
|-----|----------------------------------------------------------------------------------------------------|---------------------------|----------------------------------------|----------|
| 431 | fast Hochdeutsch<br>Stadt-Land-Unterschied<br>dialektfrei aber schlechtes Deutsch<br>sprachneutral | 36<br>10<br>3<br>2        | fast Hochdeutsch<br>kein gutes Deutsch | 95<br>32 |
| 441 | Erzgebirge<br>Lausitz<br>Niederlausitz/ Spreewald<br>Richtung Berlin<br>Südsachsen                 | 31<br>16<br>13<br>10<br>6 | -                                      | -        |
| 442 | -                                                                                                  | -                         | -                                      | -        |

Tabelle 55: Die von der meiß. und lausitz. Gruppe fünf häufigsten assoziierten Dialektmerkmale

| Sub-<br>gruppe | Osterl.<br>Gr.                                                                                        | Punkt-<br>wert              | Vogt.-Erzg.<br>Gr.                                                                                                                           | Punkt-<br>wert               |
|----------------|-------------------------------------------------------------------------------------------------------|-----------------------------|----------------------------------------------------------------------------------------------------------------------------------------------|------------------------------|
| 123            | k > g<br>rollendes R<br>g > j<br>sch-Laute<br>t > d                                                   | 73<br>58<br>54<br>39<br>28  | rollendes R<br>sch-Laute<br>ch > sch<br>k > g<br>g > ch                                                                                      | 79<br>30<br>27<br>27<br>15   |
| 132            | SINGEN<br>am Satzende Stimme hoch<br>Stimme hell<br>laierig                                           | 325<br>15<br>5<br>3         | SINGEN<br>am Satzende hoch                                                                                                                   | 185<br>6                     |
| 142            | langgezogen<br>verständlich<br>unverständlich<br>alles zusammen gesprochen<br>[o] kehlig              | 94<br>73<br>49<br>37<br>19  | unverständlich<br>langgezogen<br>kehlig<br>lassen was weg in der Aussprache<br>andere Aussprache                                             | 42<br>34<br>12<br>12<br>11   |
| 321            | ni (nicht)<br>jegangen/ jejangen/ jelb/ Jummi<br>(Gummi)<br>och (auch)<br>ick<br>ämal (einmal)        | 136<br>52<br>27<br>18<br>14 | git (geht)<br>giehste (gehst du)<br>gimmorma (gehen wir mal)<br>ma(o)l<br>ni (nicht)                                                         | 27<br>27<br>27<br>27<br>24   |
| 432            | Sächsisch<br>Anhaltinisch/ Sachsenanhaltinisch<br>Erzgebirgisch<br>Thüringisch<br>Leipziger Sächsisch | 225<br>57<br>57<br>56<br>50 | Erzgebirgisch<br>Vogtländisch<br>Thüringisch<br>Dresdner Sächsisch<br>Sächsisch                                                              | 131<br>131<br>80<br>78<br>67 |
| 220            | -                                                                                                     | -                           | Verkürzungen (ran statt heran)/<br>Zusammenziehen (haste. biste)<br>Endungen verschlucken<br>[e] angehängt auch bei Vokalen<br>wenige Silben | 71<br>57<br>7<br>7           |
| 230            | -                                                                                                     | -                           | -                                                                                                                                            | -                            |
| 312            | nu (ja)<br>Mutzschekiepchen (Marienkäfer)<br>Nuschel (Kopf)                                           | 76<br>30<br>23              | nu (ja)<br>nor (ja)<br>no (ja)                                                                                                               | 81<br>49<br>32               |

|     |                                                                                                                              |                             |                                                                                                                                  |                           |
|-----|------------------------------------------------------------------------------------------------------------------------------|-----------------------------|----------------------------------------------------------------------------------------------------------------------------------|---------------------------|
|     | gä (nicht wahr?)<br>na (ja)                                                                                                  | 14<br>8                     | itze (es ist)<br>Servus (Tschüss)                                                                                                | 27<br>14                  |
| 411 | anders als Chemnitzer, Leipziger,<br>Dresdner Dialekt<br>ganz eigentümlich<br>nichts Besonderes<br>fast normal<br>Kulturerbe | 269<br>16<br>9<br>8<br>8    | -                                                                                                                                | -                         |
| 412 | hell<br>breit<br>hart<br>weich<br>emotional                                                                                  | 97<br>32<br>25<br>24<br>17  | weich<br>breit<br>vertraut<br>hart<br>emotional                                                                                  | 45<br>25<br>23<br>6<br>4  |
| 414 | erkennt man<br>wie <i>Person</i> $\chi\gamma\zeta$<br>anders als wir                                                         | 345<br>12<br>3              | erkennt man<br>so wie ich<br>anders<br>man hört den Unterschied zu<br>Dresden und Leipzig<br>wie <i>Person</i> $\chi\gamma\zeta$ | 147<br>34<br>18<br>6<br>4 |
| 422 | -                                                                                                                            | -                           | -                                                                                                                                | -                         |
| 431 | -                                                                                                                            | -                           | -                                                                                                                                | -                         |
| 441 | Sachsen-Anhalt<br>Südsachsen<br>Thüringen<br>Großraum Leipzig<br>Lausitz                                                     | 105<br>46<br>42<br>20<br>19 | Vogtland<br>Erzgebirge<br>Lausitz<br>Chemnitzer Gegend<br>Oberlausitz                                                            | 16<br>14<br>14<br>11<br>9 |
| 442 | -                                                                                                                            | -                           | -                                                                                                                                | -                         |

Tabelle 56: Die von der osterl. und vogt.-erzgeb. Gruppe fünf häufigsten assoziierten Dialektmerkmale

| Sub-<br>gruppe | Thür.<br>Gr.                                                                                   | Punkt-<br>wert             | Nord-<br>gr.                                                                                                    | Punkt-<br>wert             |
|----------------|------------------------------------------------------------------------------------------------|----------------------------|-----------------------------------------------------------------------------------------------------------------|----------------------------|
| 123            | rollendes R<br>t > d<br>k > g<br>p > b<br>g > j                                                | 56<br>27<br>19<br>19<br>18 | g > j<br>rollendes R<br>k > g<br>[p. t. k] weich<br>sch-Laute                                                   | 47<br>21<br>17<br>16<br>13 |
| 132            | SINGEN                                                                                         | 121                        | SINGEN<br>Stimme eher hoch angesetzt<br>nasaler Ton<br>recht tiefe Sprache (Frequenz)                           | 176<br>10<br>4<br>4        |
| 142            | langgezogen<br>unverständlich<br>zusammengezogen<br>verständlich<br>abgehackt                  | 56<br>20<br>16<br>13<br>12 | alles langgezogen<br>unverständlich<br>verständlich<br>bequeme Sprechweise<br>reden mit Zwerchfell              | 54<br>22<br>15<br>11<br>8  |
| 321            | gemajetze (gehen wir jetzt)<br>och (auch)<br>Arzgebirge<br>daheeme (zu Hause)<br>gähen (gehen) | 11<br>10<br>8<br>8<br>8    | janz/ jeht/ jut (ganz/ geht/ gut)<br>nee (nein)<br>och (auch)<br>ken/ kene (kein/ keine)<br>au net (auch nicht) | 46<br>43<br>38<br>19<br>17 |
| 432            | Sächsisch<br><br>Thüringisch<br>Anhaltinisch                                                   | 163<br><br>87<br>68        | Sächsisch<br>Anhaltinisch/<br>Sachsenanhaltinisch<br>Thüringisch                                                | 224<br><br>71<br>68        |

|     |                            |     |                                                |     |
|-----|----------------------------|-----|------------------------------------------------|-----|
|     | Randsächsisch              | 56  | Hallisch                                       | 65  |
|     | Erzgebirgisch              | 37  | Berlinisch                                     | 49  |
| 220 | -                          | -   | -                                              | -   |
| 230 | -                          | -   | -                                              | -   |
| 312 | gälle/ gäll (nicht wahr?)  | 24  | nu (ja)                                        | 65  |
|     | gä (nicht wahr?)           | 21  | gä (nicht wahr?)                               | 27  |
|     | no (ja)                    | 19  | gäll/gälle (nicht wahr?)                       | 19  |
|     | wa (nicht wahr?)           | 19  | fai [keine weiteren Angaben]                   | 17  |
|     | nu (ja)                    | 11  | ha(o) (ja)                                     | 17  |
| 411 | -                          | -   | -                                              | -   |
| 412 | breit                      | 64  |                                                |     |
|     | hart                       | 38  |                                                |     |
|     | weich                      | 30  |                                                |     |
|     | deftig                     | 9   |                                                |     |
|     | schnell                    | 8   |                                                |     |
| 414 | man hört es                | 130 | man erkennt es                                 | 118 |
|     | so wie ich                 | 18  | so wie ich                                     | 24  |
|     | wie <i>Person xyz</i>      | 12  | wie Kaugummi                                   | 5   |
|     | Kindheit                   | 2   | schichtspezifisch                              | 4   |
|     |                            |     | wie Magdeburger                                | 3   |
| 422 | unangenehm                 | 118 | unangenehm                                     | 92  |
|     | angenehm                   | 73  | angenehm                                       | 85  |
|     | gesetzt                    | 3   | lustig                                         | 35  |
|     | dörflich                   | 2   |                                                |     |
|     | freundliche Menschen       | 2   |                                                |     |
| 431 | -                          | -   | -                                              | -   |
| 441 | Sachsen                    | 42  | Sachsen                                        | 27  |
|     | Thüringen                  | 28  | Sachsen-Anhalt                                 | 26  |
|     | Sachsen-Anhalt             | 20  | Thüringen                                      | 24  |
|     | Erzgebirge und Randgebiete | 17  | Lausitz                                        | 13  |
|     | Franken                    | 16  | Leipziger Ecke                                 | 13  |
| 442 | -                          | -   | Mischung/ fließende Übergänge                  | 79  |
|     |                            |     | südliches Sachsen                              | 18  |
|     |                            |     | zwischen Dresden, Leipzig und Chemnitz         | 15  |
|     |                            |     | Übergang Thüringen, Sachsen und Sachsen-Anhalt | 11  |
|     |                            |     | zwischen Leipzig und Meißen                    | 7   |

Tabelle 57: Die von der thür. Gruppe und Nordgruppe fünf häufigsten assoziierten Dialektmerkmale

| Beschreibung                                                                                                                                                                | Subgruppe | Punktwert |
|-----------------------------------------------------------------------------------------------------------------------------------------------------------------------------|-----------|-----------|
| nu (ja)                                                                                                                                                                     | 312       | 52        |
| unangenehm/ doof/ plump/ dumm/ klingt bekloppt/<br>nicht intelligent/ wenig Prestige/ hohles Sächsisch/ plattes<br>Sächsisch                                                | 422       | 48        |
| Singen/ Sing-Sang/ besondere Melodie/ besondere<br>Sprachmelodie/ Melodie/ mehr gesungen/ nicht so starker<br>Sing-Sang                                                     | 132       | 37        |
| Sächsisch/ Kerngebiet Sächsisch/ richtiges Sächsisch/<br>tiefstes Sächsisch/                                                                                                | 432       | 31        |
| verkürzte Aussprache/ mehren alles zusammen/ alles ein<br>Brei/ zusammenziehen/ Worte werden kürzer gefasst/<br>verbinden von Worten/ zusammenziehen von Silben             | 142       | 25        |
| Dresdner Sächsisch/ ähnlich wie in Dresden/ sehr nah am<br>Dresdner                                                                                                         | 432       | 23        |
| unsauber gesprochen/ nuscheln/ genuschelt/ undeutlich/<br>unverständlich/ lässige Aussprache/ nicht so klare<br>Aussprache/ schwer verständlich/ Verschlucken von<br>Worten | 142       | 19        |
| Dräsdnen                                                                                                                                                                    | 321       | 16        |
| langgezogene Aussprache/ ziehen Wörter lang/ gedehnte<br>Sprechweise                                                                                                        | 142       | 14        |
| Endungen verschlucken/ Endungen weglassen                                                                                                                                   | 220       | 14        |
| andere Begriffe/ bestimmte Begriffe                                                                                                                                         | 311       | 13        |
| e > ä                                                                                                                                                                       | 114       | 12        |
| weiche Buchstaben                                                                                                                                                           | 121       | 12        |
| Buchstaben verschlucken                                                                                                                                                     | 111       | 9         |
| breite Aussprache/ breit gemehrt/ nicht so breit                                                                                                                            | 412       | 9         |
| Kurzbegriffe                                                                                                                                                                | 311       | 8         |
| Grußformeln                                                                                                                                                                 | 311       | 8         |
| klings weich/ sprechen weich                                                                                                                                                | 412       | 8         |
| Stadt-Land-Unterschied                                                                                                                                                      | 431       | 8         |
| hochdeutscher Einfluss/ fast Hochdeutsch/ Hang zum<br>Hochdeutschen                                                                                                         | 431       | 8         |
| rollendes R; kein so extremes Rollen wie in Ebersbach                                                                                                                       | 123       | 7         |
| nor (ja)                                                                                                                                                                    | 312       | 7         |
| naja                                                                                                                                                                        | 312       | 7         |
| typisch Erzgebirgisch/ mehr Erzgebirgisch/ eine Prise<br>Erzgebirgisch                                                                                                      | 432       | 7         |
| Konsonanten weich                                                                                                                                                           | 122       | 6         |
| -ig > -ich                                                                                                                                                                  | 123       | 6         |
| nischt (nichts)                                                                                                                                                             | 321       | 6         |
| biste (bist du)                                                                                                                                                             | 321       | 6         |
| haste (hast du)                                                                                                                                                             | 321       | 6         |
| man hört es                                                                                                                                                                 | 414       | 6         |
| gemütlich/ herzlich                                                                                                                                                         | 422       | 6         |
| k > g                                                                                                                                                                       | 123       | 5         |
| kein schöner Klang/ Klang/ eigener Klang/ Tonfall anders                                                                                                                    | 132       | 5         |
| heimatlich                                                                                                                                                                  | 414       | 5         |
| nicht so wie in Chemnitz                                                                                                                                                    | 432       | 5         |
| o > u                                                                                                                                                                       | 114       | 4         |



|                                                                           |     |   |
|---------------------------------------------------------------------------|-----|---|
| p > b                                                                     | 123 | 4 |
| Satzformung                                                               | 240 | 4 |
| ni (nicht)                                                                | 321 | 4 |
| nicht so wie in Leipzig                                                   | 432 | 4 |
| Residenzsächsisch                                                         | 432 | 4 |
| größere Städte/ kleinere Dörfer                                           | 442 | 4 |
| [ei] langgezogen                                                          | 114 | 3 |
| hä (nicht wahr?)                                                          | 312 | 3 |
| Laibzsch (Leipzig)                                                        | 321 | 3 |
| eigener Sprachgebrauch                                                    | 414 | 3 |
| Mischung von Erzgebirgisch und Dresdnerisch/<br>erzgebirgisches Sächsisch | 432 | 3 |
| Berge/ Gebirge/ Hügel                                                     | 442 | 3 |
| hartes [k]                                                                | 123 | 2 |
| t > d                                                                     | 123 | 2 |
| Betonung anders                                                           | 133 | 2 |
| Endungen mit Vokalen besonders betont und langgezogen<br>(Zittaaaauuu)    | 133 | 2 |
| [i] angehängt als Abkürzungen für Worte (Koofi, Späti)                    | 220 | 2 |
| nä (nicht wahr?)                                                          | 312 | 2 |
| Glück auf                                                                 | 312 | 2 |
| Semmel (Brötchen)                                                         | 312 | 2 |
| gä (nicht wahr?)                                                          | 312 | 2 |
| daroff (darauf)                                                           | 321 | 2 |
| o (auch)                                                                  | 321 | 2 |
| komma (komm mal)                                                          | 321 | 2 |
| Bargett (Parkett)                                                         | 321 | 2 |
| Kirsche (Kirche)                                                          | 321 | 2 |
| Güsch (Küche)                                                             | 321 | 2 |
| dahemm (zu Hause)                                                         | 321 | 2 |
| grob                                                                      | 412 | 2 |
| herber Klang                                                              | 412 | 2 |
| sehr lässig                                                               | 412 | 2 |
| Wurzelsprache von Wurzelmenschen                                          | 415 | 2 |
| dörflicher Klang                                                          | 422 | 2 |
| klingt dreckiger als in Dresden                                           | 422 | 2 |
| Lausitzer Dialekt                                                         | 432 | 2 |
| Osterzgebirgisch                                                          | 432 | 2 |
| Lausitz                                                                   | 441 | 2 |
| Erzgebirge                                                                | 441 | 2 |
| östliches Sachsen                                                         | 442 | 2 |
| Übergang Dresden-Chemnitz                                                 | 442 | 2 |
| Übergangsgebiet/ Mischung                                                 | 442 | 2 |
| o, u Laute > ou                                                           | 113 | 1 |
| andere Sprachmelodie als in Dresden oder Chemnitz                         | 132 | 1 |
| rauslaufendes Sächsisch                                                   | 142 | 1 |
| verständlich                                                              | 142 | 1 |
| Bemme (Scheibe Brot)                                                      | 312 | 1 |
| Hitsche (kleine Fußbank)                                                  | 312 | 1 |
| isch                                                                      | 321 | 1 |
| Gaiser Garl                                                               | 321 | 1 |
| nu dann                                                                   | 321 | 1 |
| unterschiedliches Sächsisch                                               | 411 | 1 |

|                                         |     |     |
|-----------------------------------------|-----|-----|
| landschaftlich uninteressant            | 411 | 1   |
| wie Robert                              | 414 | 1   |
| Edelroller                              | 415 | 1   |
| etwas mehr Hochdeutsch als in Dresden   | 431 | 1   |
| nachlässiges Deutsch                    | 431 | 1   |
| Brandenburger Dialekt                   | 432 | 1   |
| ähnlich wie in Dresden aber doch anders | 432 | 1   |
| Sächsisch in Richtung Leipzig           | 432 | 1   |
| Ostsächsisch                            | 432 | 1   |
| Mischung Sächsisch und Oberlausitz      | 432 | 1   |
| Sächsische Schweiz                      | 441 | 1   |
| Zittausche Richtung                     | 441 | 1   |
| bekannte Städte                         | 441 | 1   |
| Richtung Berlin                         | 441 | 1   |
| Richtung Dresden                        | 441 | 1   |
| südlich gelegen in Sachsen              | 442 | 1   |
|                                         |     |     |
| Gesamtpunktwert                         |     | 594 |

Tabelle 58: Die assoziierten Einzelmerkmale der meißnischen Gruppe im Cluster 1

| Beschreibung                                                                                                                                                                                                                                                                  | Subgruppe | Punktwert |
|-------------------------------------------------------------------------------------------------------------------------------------------------------------------------------------------------------------------------------------------------------------------------------|-----------|-----------|
| Singen/ Sing-Sang/ melodisch/ Tonfall anders/ singender Tonfall/ singend/ singen stark/ singender Dialekt/ typischer Klang/ anderer Klang/ Tonfall/ besondere Sprachmelodie/ Satzmelodie/ andere Melodie/ anstrengende Melodie/ weicher Ton/ singen ähnlich wie im Erzgebirge | 132       | 92        |
| tiefstes Erzgebirgisch/ Erzgebirgisch/ Richtung Erzgebirgisch                                                                                                                                                                                                                 | 431       | 63        |
| bestimmte Begriffe/ andere Begriffe/ bestimmte Phrasen/ besondere Worte/ eigener Wortschatz/ typische Begriffe                                                                                                                                                                | 311       | 36        |
| schwer verständlich/ unverständlich/ schlecht verständlich/ undeutlich                                                                                                                                                                                                        | 142       | 31        |
| freundlich/ gastfreundlich/ gemütlich/ sehr nett/ angenehm/ herzlich                                                                                                                                                                                                          | 422       | 29        |
| Erzgebirge                                                                                                                                                                                                                                                                    | 441       | 27        |
| ganz weich/ sprechen weich                                                                                                                                                                                                                                                    | 412       | 18        |
| langgezogene Aussprache/ langgezogenes Sächsisch/ ziehen Wörter lang                                                                                                                                                                                                          | 142       | 17        |
| gäll (nicht wahr?)/ gälle (nicht wahr?)                                                                                                                                                                                                                                       | 312       | 17        |
| Thüringer/ bisschen Thüringisch/ Thüringer Gebirgsdialekt                                                                                                                                                                                                                     | 432       | 16        |
| a > ou                                                                                                                                                                                                                                                                        | 114       | 12        |
| verwechseln wie und als                                                                                                                                                                                                                                                       | 230       | 12        |
| kurze Sprechweise/ verkürzte Aussprache                                                                                                                                                                                                                                       | 142       | 11        |
| Sächsisch/ tiefstes Sächsisch/ Ursächsisch/ leichtes Sächsisch                                                                                                                                                                                                                | 432       | 11        |
| erzgebirgisches Sächsisch                                                                                                                                                                                                                                                     | 432       | 11        |
| Vogtländisch/ Vuuchtländisch                                                                                                                                                                                                                                                  | 432       | 11        |
| hässlichstes Sächsisch/ doof/ unangenehmstes Sächsisch/ schlimmstes Sächsisch                                                                                                                                                                                                 | 422       | 9         |
| o > u                                                                                                                                                                                                                                                                         | 114       | 8         |
| viel [u]                                                                                                                                                                                                                                                                      | 113       | 7         |
| bestimmte Lautkombinationen                                                                                                                                                                                                                                                   | 111       | 6         |
| sprechen deutlich                                                                                                                                                                                                                                                             | 142       | 6         |

|                                                                     |     |   |
|---------------------------------------------------------------------|-----|---|
| Glück auf                                                           | 312 | 6 |
| verzerrtes Sächsisch                                                | 142 | 5 |
| dortn                                                               | 321 | 5 |
| Regionalstolz                                                       | 415 | 5 |
| Vogtländisch-Erzgebirgisch                                          | 432 | 5 |
| zwischen Sächsisch und Erzgebirgisch/ sächsischer als Erzgebirgisch | 432 | 5 |
| Richtung Vogtland/ Vogtland                                         | 441 | 5 |
| kleinere Dörfer/ größere Städte                                     | 442 | 5 |
| Konsonanten weich                                                   | 122 | 4 |
| leiert etwas                                                        | 132 | 4 |
| Betonung anders                                                     | 133 | 4 |
| Ausprache                                                           | 142 | 4 |
| gä (nicht wahr?)                                                    | 312 | 4 |
| Ziehe (Zehe)                                                        | 321 | 4 |
| Gung (Junge)                                                        | 321 | 4 |
| Schrange (Schrank)                                                  | 321 | 4 |
| Mai Hus un mai Gag. (Meine Hose und meine Jacke.)                   | 321 | 4 |
| traditionell                                                        | 413 | 4 |
| Thüringisch-Vogtländisch                                            | 432 | 4 |
| Dresdner Sächsisch/ ähnlich wie in Dresden                          | 432 | 4 |
| Südsachsen/ südlich gelegen in Sachsen                              | 441 | 4 |
| Gebirge/ Berge/ Hügel                                               | 442 | 4 |
| rollendes R                                                         | 123 | 3 |
| zusammenziehen                                                      | 142 | 3 |
| breit/ nicht so breit                                               | 412 | 3 |
| wie Katharina Witt/ wie Robert                                      | 414 | 3 |
| Chemnitzer Sing-Sang mit Schuss Plauen                              | 432 | 3 |
| Osterzgebirgisch                                                    | 432 | 3 |
| Gebirgsdialekt                                                      | 432 | 3 |
| Raum Chemnitz                                                       | 441 | 3 |
| Buchstaben verschlucken                                             | 111 | 2 |
| langgezogene Vokale                                                 | 112 | 2 |
| o, u Laute > ou                                                     | 113 | 2 |
| weiche Buchstaben                                                   | 121 | 2 |
| k > g                                                               | 123 | 2 |
| [sch] Laute                                                         | 123 | 2 |
| klares Sächsisch                                                    | 142 | 2 |
| läuft extrem raus/ rauslaufendes Sächsisch                          | 142 | 2 |
| Endungen verschlucken/ Endungen weglassen                           | 220 | 2 |
| nu (ja)                                                             | 312 | 2 |
| nuja                                                                | 312 | 2 |
| Wo de Hos'n Hus'n has'n und de Hus'n Hos'n sei do sei mir drham.    | 313 | 2 |
| kammts (Kommt Ihr)                                                  | 321 | 2 |
| manschma(o)                                                         | 321 | 2 |
| dahemm (zu Hause)                                                   | 321 | 2 |
| vertrauensvoll                                                      | 412 | 2 |
| [ei] langgezogen                                                    | 114 | 1 |
| e > ä                                                               | 114 | 1 |
| -ig > -ich                                                          | 123 | 1 |
| vogtländischer Sing-Sang                                            | 132 | 1 |
| [a], [ä] betont                                                     | 133 | 1 |

|                                                             |     |     |
|-------------------------------------------------------------|-----|-----|
| kehlige Aussprache                                          | 142 | 1   |
| verbinden von Worten                                        | 220 | 1   |
| Kurzbegriffe                                                | 311 | 1   |
| Grußformeln                                                 | 311 | 1   |
| fai [keine weiteren Angaben]                                | 312 | 1   |
| Grüß Gott                                                   | 312 | 1   |
| Bemme (Scheibe Brot)                                        | 312 | 1   |
| Hitsche (kleine Fußbank)                                    | 312 | 1   |
| Laibzsch (Leipzig)                                          | 321 | 1   |
| nischt (nichts)                                             | 321 | 1   |
| Dräsdén                                                     | 321 | 1   |
| biste (bist du)                                             | 321 | 1   |
| haste (hast du)                                             | 321 | 1   |
| nu dann                                                     | 321 | 1   |
| bisschen rollen                                             | 411 | 1   |
| Übersteigerung des Dresdner Sächsisch                       | 411 | 1   |
| unterschiedliches Sächsisch                                 | 411 | 1   |
| kraftvoll                                                   | 412 | 1   |
| legér                                                       | 412 | 1   |
| wotzig                                                      | 412 | 1   |
| anders                                                      | 414 | 1   |
| Wurzelsprache von Wurzelmenschen                            | 415 | 1   |
| amüstant                                                    | 422 | 1   |
| dörflicher Klang                                            | 422 | 1   |
| Stadt-Land-Unterschied                                      | 431 | 1   |
| nachlässiges Deutsch                                        | 431 | 1   |
| hochdeutscher Einfluss                                      | 431 | 1   |
| Sachsenanhaltinisch                                         | 432 | 1   |
| Bayerisch                                                   | 432 | 1   |
| mit Chemnitzer Anklang                                      | 432 | 1   |
| Lausitzer Sächsisch                                         | 432 | 1   |
| Mischung Sächsisch und Oberlausitz                          | 432 | 1   |
| Vorerzgebirgsdialekt                                        | 432 | 1   |
| Lausitz                                                     | 441 | 1   |
| Zittausche Richtung                                         | 441 | 1   |
| Muldental                                                   | 441 | 1   |
| östliches Sachsen                                           | 442 | 1   |
| zwischen weich und hart (zwischen Sächsisch und Berlinisch) | 442 | 1   |
| Übergang Dresden nach Chemnitz                              | 442 | 1   |
| Übergangsgebiet                                             | 442 | 1   |
| thüringisch-vogtländischer Übergang                         | 442 | 1   |
|                                                             |     |     |
| Gesamtpunktwert                                             |     | 649 |

Tabelle 59: Die assoziierten Einzelmerkmale der meißnischen Gruppe im Cluster 2

| Beschreibung                                                                                                                           | Subgruppe | Punktwert |
|----------------------------------------------------------------------------------------------------------------------------------------|-----------|-----------|
| rollendes R; leichtes rollendes R; kein so extremes Rollen wie in Ebersbach; rollen das R etwas mehr als in Görlitz/ teilweise rollern | 123       | 58        |
| Tonfall/ besondere Sprachmelodie/ Melodie/ eigener Klang/ Singen/ kein schöner Klang                                                   | 132       | 24        |
| Lausitzer Dialekt/ Lausitzer Aussprache                                                                                                | 432       | 17        |
| Lausitz                                                                                                                                | 441       | 12        |
| Endungen mit Vokalen besonders betont und langgezogen (Zittaaaauu)                                                                     | 133       | 8         |
| Sorbisch                                                                                                                               | 432       | 8         |
| anderscher (anders als)                                                                                                                | 230       | 7         |
| Oberlausitzer Dialekt/ Oberlausitzisch                                                                                                 | 432       | 7         |
| Schiebock (Bischofswerda)                                                                                                              | 321       | 6         |
| Edelroller                                                                                                                             | 415       | 6         |
| langgezogene Aussprache                                                                                                                | 142       | 5         |
| nicht so klare Aussprache/ genuschelt/ schlecht verständlich                                                                           | 142       | 5         |
| naja                                                                                                                                   | 312       | 5         |
| Usi (Mütze)                                                                                                                            | 312       | 5         |
| mächen (Mädchen)                                                                                                                       | 321       | 5         |
| Ostsächsisch                                                                                                                           | 432       | 5         |
| o, u Laute > ou                                                                                                                        | 113       | 4         |
| Konsonanten weich                                                                                                                      | 122       | 4         |
| zusammenziehen/ Worte werden kürzer gefasst                                                                                            | 142       | 4         |
| andere Begriffe                                                                                                                        | 311       | 4         |
| nu dann                                                                                                                                | 321       | 4         |
| hohles Sächsisch/ plattes Sächsisch                                                                                                    | 422       | 4         |
| ni (nicht)                                                                                                                             | 321       | 3         |
| komme ma nuff (komm mal hoch)                                                                                                          | 321       | 3         |
| daroff (darauf)                                                                                                                        | 321       | 3         |
| eigener Sprachgebrauch/ anders                                                                                                         | 414       | 3         |
| Brandenburgisch                                                                                                                        | 432       | 3         |
| Dresdner Sächsisch/ nah am Dresdner Sächsisch                                                                                          | 432       | 3         |
| östliches Sachsen                                                                                                                      | 442       | 3         |
| größere Städte                                                                                                                         | 442       | 3         |
| Mischung/ Übergangsgebiet                                                                                                              | 442       | 3         |
| [p] weich                                                                                                                              | 123       | 2         |
| [k] weich                                                                                                                              | 123       | 2         |
| Betonung anders                                                                                                                        | 133       | 2         |
| o (auch)                                                                                                                               | 321       | 2         |
| komma (komm mal)                                                                                                                       | 321       | 2         |
| Kirsche (Kirche)                                                                                                                       | 321       | 2         |
| Güsch (Küche)                                                                                                                          | 321       | 2         |
| sprechen weich                                                                                                                         | 412       | 2         |
| wie Katharina Witt/ wie Robert                                                                                                         | 414       | 2         |
| dörflicher Klang                                                                                                                       | 422       | 2         |
| gemütlich                                                                                                                              | 422       | 2         |
| Bautzner Dialekt                                                                                                                       | 432       | 2         |
| Übergang Lausitz                                                                                                                       | 442       | 2         |
| Berge/ Hügel                                                                                                                           | 442       | 2         |
| Buchstaben verschlucken                                                                                                                | 111       | 1         |
| e > ä                                                                                                                                  | 114       | 1         |

|                                  |     |     |
|----------------------------------|-----|-----|
| -ig > -ich                       | 123 | 1   |
| Endungen verschlucken            | 220 | 1   |
| nischt (nichts)                  | 321 | 1   |
| Dräsdén                          | 321 | 1   |
| biste (bist du)                  | 321 | 1   |
| haste (hast du)                  | 321 | 1   |
| Bargett (Parkett)                | 321 | 1   |
| icken                            | 321 | 1   |
| isch                             | 321 | 1   |
| herber Klang                     | 412 | 1   |
| Wurzelsprache von Wurzelmenschen | 415 | 1   |
| nicht herzlich                   | 422 | 1   |
| Anhaltinischer Touch             | 432 | 1   |
| Berlinerisch                     | 432 | 1   |
| Lausitzer Sächsisch              | 432 | 1   |
| Übergang Lausitz-Sachsen         | 442 | 1   |
|                                  |     |     |
| Gesamtpunktwert                  |     | 280 |

Tabelle 60: Die assoziierten Einzelmerkmale der meißnischen Gruppe im Cluster 3

| Beschreibung                                           | Subgruppe | Punktwert |
|--------------------------------------------------------|-----------|-----------|
| Fränkisch                                              | 432       | 8         |
| Bayerisch/ bayerischer Touch                           | 432       | 5         |
| angenehm/ freundlich/ nicht aggressiv/ sehr nett       | 422       | 4         |
| schlecht verständlich/ unverständlich                  | 142       | 3         |
| Fränkisch-Bayerisch                                    | 432       | 3         |
| leicht verständlich/ besser verständlich als Bayerisch | 142       | 2         |
| hochdeutsch mit leicht süddeutschem Akzent             | 431       | 2         |
| gerolltes R mit der Zunge                              | 123       | 1         |
| schnelle Aussprache                                    | 131       | 1         |
| [a], [ä] betont                                        | 133       | 1         |
| kehlige Aussprache                                     | 142       | 1         |
| Grüß Gott                                              | 312       | 1         |
| ni (nicht)                                             | 321       | 1         |
| basst scho                                             | 321       | 1         |
| kraftvoll                                              | 412       | 1         |
| das hört man                                           | 414       | 1         |
| unmöglich                                              | 422       | 1         |
| Vogtländisch-Fränkisch                                 | 432       | 1         |
| Dreiländereck                                          | 441       | 1         |
| Bayern                                                 | 441       | 1         |
| mehr Richtung Erzgebirge                               | 441       | 1         |
| Oberfranken                                            | 441       | 1         |
|                                                        |           |           |
| Gesamtpunktwert                                        |           | 42        |

Tabelle 61: Die assoziierten Einzelmerkmale der meißnischen Gruppe im Cluster 4

| Beschreibung                                                              | Subgruppe | Punktwert |
|---------------------------------------------------------------------------|-----------|-----------|
| Brandenburgisch/ Richtung Brandenburgisch                                 | 432       | 17        |
| sprechen hart/ herb/ kühl/ sprechen kalt/ klingt hart                     | 412       | 16        |
| Berlinerisch/ Richtung Berlinerisch                                       | 432       | 16        |
| Niederlausitz/ Spreewald                                                  | 441       | 13        |
| besonderer Klang/ Tonfall/ besondere Sprachmelodie/ anderer Klang/ Singen | 132       | 12        |
| Hochdeutsch/ nah am Hochdeutschen                                         | 431       | 11        |
| Übergang Lausitz                                                          | 442       | 10        |
| Richtung Berlin                                                           | 441       | 9         |
| rollendes R                                                               | 123       | 8         |
| icken                                                                     | 321       | 8         |
| wenig herzlich/ angenervt/ nicht herzlich                                 | 422       | 8         |
| Anhaltinisch/ Anhaltinisches Platt                                        | 432       | 8         |
| eigener Sprachgebrauch/ anders                                            | 414       | 7         |
| Sorbisch                                                                  | 432       | 7         |
| mit gewissen weichen Buchstaben                                           | 121       | 6         |
| man hört es                                                               | 414       | 6         |
| halb Sorbisch halb Berlinerisch                                           | 432       | 6         |
| Niederlausitzisch                                                         | 432       | 6         |
| Mischung                                                                  | 442       | 6         |
| offene Vokale                                                             | 112       | 5         |
| Grammatik anders                                                          | 210       | 5         |
| Oberlausitzer                                                             | 432       | 5         |
| o, u Laute > ou                                                           | 113       | 4         |
| etwas mehr Hochdeutsch als in Dresden                                     | 431       | 4         |
| Lausitzerisch/ Lausitzer Aussprache                                       | 432       | 4         |
| Richtung Preußen                                                          | 441       | 4         |
| bei sie                                                                   | 230       | 3         |
| nu (ja)                                                                   | 312       | 3         |
| nuja                                                                      | 312       | 3         |
| nu dann                                                                   | 321       | 3         |
| Preußischer Einschlag/ Preußisch                                          | 432       | 3         |
| Brandenburg                                                               | 441       | 4         |
| kleinere Dörfer/ größere Städte                                           | 442       | 3         |
| unsauber gesprochen/ unklar gesprochen                                    | 142       | 2         |
| zusammenziehen/ Worte werden kürzer gefasst                               | 142       | 2         |
| hohles Sächsisch/ plattes Sächsisch                                       | 422       | 2         |
| sprachneutral                                                             | 431       | 2         |
| Hochdeutsch mit Berliner Einfluss                                         | 432       | 2         |
| Sächsisch                                                                 | 432       | 2         |
| außerhalb von Sachsen                                                     | 441       | 2         |
| östliches Sachsen                                                         | 442       | 2         |
| Konsonanten weich                                                         | 122       | 1         |
| [p] weich                                                                 | 123       | 1         |
| [k] weich                                                                 | 123       | 1         |
| Betonung anders                                                           | 133       | 1         |
| langgezogene Aussprache                                                   | 142       | 1         |
| andere Begriffe                                                           | 311       | 1         |
| Lückenfüller beim Sprechen                                                | 311       | 1         |
| äh                                                                        | 312       | 1         |

|                                       |     |     |
|---------------------------------------|-----|-----|
| daroff (darauf)                       | 321 | 1   |
| Schiebock (Bischofswerda)             | 321 | 1   |
| sou (so)                              | 321 | 1   |
| o (auch)                              | 321 | 1   |
| komma (komm mal)                      | 321 | 1   |
| Bargett (Parkett)                     | 321 | 1   |
| Kirsche (Kirche)                      | 321 | 1   |
| Güsch (Küche)                         | 321 | 1   |
| Übersteigerung des Dresdner Sächsisch | 411 | 1   |
| landschaftlich uninteressant          | 411 | 1   |
| sprechen weich                        | 412 | 1   |
| witzig                                | 422 | 1   |
| tiefstes Sächsisch                    | 431 | 1   |
| Cottbusserisch                        | 432 | 1   |
| ähnlich wie in Dresden                | 432 | 1   |
| Thüringisch-Vogtländische Mischung    | 432 | 1   |
| Spreewald-Slang                       | 432 | 1   |
| Lausitz                               | 441 | 1   |
| südlich gelegen in Sachsen            | 442 | 1   |
| liegt an der Elster                   | 442 | 1   |
| Staffellandschaft                     | 442 | 1   |
|                                       |     |     |
| Gesamtpunktwert                       |     | 278 |

Tabelle 62: Die assoziierten Einzelmerkmale der meißnischen Gruppe im Cluster 5

| Beschreibung                                                                                                                                                                                                                                                                                                 | Subgruppe | Punktwert |
|--------------------------------------------------------------------------------------------------------------------------------------------------------------------------------------------------------------------------------------------------------------------------------------------------------------|-----------|-----------|
| Sing-Sang/ anderer Klang/ Singen/ regionaltypischer Sing-Sang/ Tonfall/ besondere Sprachmelodie/ eigene Melodie/ nicht so starker Sing-Sang/ mehr gesungen/ anderer Klang als in Dresden/ andere Sprachmelodie als in Dresden oder Chemnitz/ typischer Leipziger Sing-Sang/ singen ähnlich wie im Erzgebirge | 132       | 36        |
| k > g                                                                                                                                                                                                                                                                                                        | 123       | 16        |
| Endungen verschlucken/ verändern Endungen/ Endungen weglassen/ verkürzen Wörter stark                                                                                                                                                                                                                        | 220       | 13        |
| nicht intelligent/ grauselig/ hässlich/ unangenehm/ doof/ nicht niedlich/ plump/ wenig Prestige                                                                                                                                                                                                              | 422       | 13        |
| langgezogene Aussprache/ ziehen Wörter lang                                                                                                                                                                                                                                                                  | 142       | 12        |
| alles weich/ klingt weich/ sprechen weich                                                                                                                                                                                                                                                                    | 412       | 10        |
| breit gemehrt/ breit gesprochen/ breite Aussprache                                                                                                                                                                                                                                                           | 412       | 8         |
| Leipziger Dialekt/ Leipziger Sächsisch                                                                                                                                                                                                                                                                       | 432       | 8         |
| Sächsisch/ Ursächsisch/ Kerngebiet Sächsisch                                                                                                                                                                                                                                                                 | 432       | 7         |
| nachlässige Aussprache/ undeutlich/ nuschelnd                                                                                                                                                                                                                                                                | 142       | 6         |
| vlei (vielleicht)                                                                                                                                                                                                                                                                                            | 321       | 6         |
| nach heeme (nach Hause)                                                                                                                                                                                                                                                                                      | 321       | 6         |
| furchtbare falsche Grammatik                                                                                                                                                                                                                                                                                 | 422       | 6         |
| mehren alles zusammen/ zusammenziehen/ Worte werden kürzer gefasst                                                                                                                                                                                                                                           | 142       | 5         |
| man hört es                                                                                                                                                                                                                                                                                                  | 414       | 5         |
| Gäiser Garl                                                                                                                                                                                                                                                                                                  | 321       | 4         |
| kein nu                                                                                                                                                                                                                                                                                                      | 321       | 4         |
| grob                                                                                                                                                                                                                                                                                                         | 412       | 4         |
| Dresdner Sächsisch                                                                                                                                                                                                                                                                                           | 432       | 4         |



|                                                |     |   |
|------------------------------------------------|-----|---|
| o > u                                          | 114 | 3 |
| Dräsdén                                        | 321 | 3 |
| Laibzsch (Leipzig)                             | 321 | 3 |
| legér                                          | 412 | 3 |
| Ostdeutsch                                     | 413 | 3 |
| Hochdeutsch                                    | 431 | 3 |
| Anhaltinisch/ Anhaltinisches Platt             | 432 | 3 |
| Staffellandschaft zwischen Dresden und Leipzig | 442 | 3 |
| offene Vokale                                  | 112 | 2 |
| [e] > langgezogen                              | 114 | 2 |
| Vokale weg                                     | 114 | 2 |
| Betonung anders/ andere Betonung der Vokale    | 133 | 2 |
| Grammatik anders                               | 210 | 2 |
| anders als Chemnitz                            | 411 | 2 |
| dörflicher Klang                               | 422 | 2 |
| herzlich/ lustig                               | 422 | 2 |
| hohles Sächsisch/ plattes Sächsisch            | 422 | 2 |
| Muldental                                      | 441 | 2 |
| zwischen Thüringen und Sachsen                 | 442 | 2 |
| o, u Laute > ou                                | 113 | 1 |
| a > o                                          | 114 | 1 |
| Konsonanten weich                              | 122 | 1 |
| [p] weich                                      | 123 | 1 |
| [k] weich                                      | 123 | 1 |
| sch-Laute                                      | 123 | 1 |
| rollendes R                                    | 123 | 1 |
| rauslaufendes Sächsisch                        | 142 | 1 |
| klare Aussprache                               | 142 | 1 |
| andere Begriffe                                | 311 | 1 |
| Kurzbegriffe                                   | 311 | 1 |
| Lückenfüller beim Sprechen                     | 311 | 1 |
| Grußformeln                                    | 311 | 1 |
| gälle (nicht wahr?)                            | 312 | 1 |
| nu (ja)                                        | 312 | 1 |
| ni (nicht)                                     | 321 | 1 |
| daroff (darauf)                                | 321 | 1 |
| o (auch)                                       | 321 | 1 |
| komma (komm mal)                               | 321 | 1 |
| Bargett (Parkett)                              | 321 | 1 |
| icken                                          | 321 | 1 |
| Kirsche (Kirche)                               | 321 | 1 |
| Güsché (Küche)                                 | 321 | 1 |
| manschma(o)                                    | 321 | 1 |
| Vogelgrippengegend                             | 411 | 1 |
| Übersteigerung des Dresdner Sächsisch          | 411 | 1 |
| unterschiedliches Sächsisch                    | 411 | 1 |
| herber Tonfall                                 | 412 | 1 |
| kühl                                           | 412 | 1 |
| sauber                                         | 412 | 1 |
| wotzig                                         | 412 | 1 |
| wie frühere Lehrerin                           | 414 | 1 |
| Stadt-Land-Unterschied                         | 431 | 1 |
| Berlinerisch                                   | 432 | 1 |

|                                      |     |     |
|--------------------------------------|-----|-----|
| fast Erzgebirgisch                   | 432 | 1   |
| zwischen Sächsisch und Erzgebirgisch | 432 | 1   |
| Thüringisch                          | 432 | 1   |
| nicht Sachsen                        | 441 | 1   |
| Lausitz                              | 441 | 1   |
| größere Städte                       | 442 | 1   |
| Staffellandschaft                    | 442 | 1   |
|                                      |     |     |
| Gesamtpunktwert                      |     | 260 |

Tabelle 63: Die assoziierten Einzelmerkmale der meißnischen Gruppe im Cluster 6

| Beschreibung                                                                         | Subgruppe | Punktwert |
|--------------------------------------------------------------------------------------|-----------|-----------|
| Thüringisch/ Thüringer Dialekt                                                       | 432       | 23        |
| gälle (nicht wahr?)/ gäll (nicht wahr?)/ hängen Wörter an Sätze ran (gäll)           | 312       | 18        |
| andere Melodie/ singender Tonfall/ Singen/ Klang/ eigene Melodie/ besondere Betonung | 132       | 16        |
| freundlich/ klingt nett/ verbindlich/ angenehm                                       | 422       | 10        |
| sprechen deutlich                                                                    | 142       | 3         |
| anderes Vokabular                                                                    | 311       | 3         |
| nicht hart                                                                           | 412       | 3         |
| thüringisch geprägtes Sächsisch                                                      | 432       | 3         |
| Thüringisch-Hochdeutsch                                                              | 432       | 3         |
| Thüringisch-Vogtländische Mischung                                                   | 432       | 3         |
| nicht all zu sehr Sächsisch/ Sächsisch aber anders                                   | 432       | 3         |
| rauslaufendes Sächsisch                                                              | 142       | 2         |
| klarer als Osterzegebirge                                                            | 142       | 2         |
| gä (nicht wahr?)                                                                     | 312       | 2         |
| Richtung Anhaltinisch                                                                | 432       | 2         |
| bekannte Städte                                                                      | 441       | 2         |
| zwischen Thüringen und Sachsen                                                       | 442       | 2         |
| [sch] statt [ch]                                                                     | 123       | 1         |
| man hört es                                                                          | 414       | 1         |
| zwischen Hochdeutsch und Vogtländisch                                                | 432       | 1         |
| nicht Sachsen                                                                        | 441       | 1         |
| zwischen Thüringen und Leipzig                                                       | 442       | 1         |
|                                                                                      |           |           |
| Gesamtpunktwert                                                                      |           | 105       |

Tabelle 64: Die assoziierten Einzelmerkmale der meißnischen Gruppe im Cluster 7

| Beschreibung                                                                | Subgruppe | Punktwert |
|-----------------------------------------------------------------------------|-----------|-----------|
| Klang/ eigene Melodie/ Singen                                               | 132       | 3         |
| icken                                                                       | 321       | 3         |
| Sachsenanhaltinisch/ Anhaltinisches Platt                                   | 432       | 3         |
| Weichmachen von harten Buchstaben                                           | 121       | 2         |
| k > g                                                                       | 123       | 2         |
| g > ch                                                                      | 123       | 2         |
| wa (nicht wahr?)                                                            | 312       | 2         |
| Merseburch (Merseburg)                                                      | 321       | 2         |
| kühl/ nicht niedrig                                                         | 412       | 2         |
| Berlinerisch                                                                | 432       | 2         |
| halb Sächsisch halb Berlinerisch/ sächsische Wörter und Berliner Aussprache | 432       | 2         |
| a > o                                                                       | 114       | 1         |
| besondere Betonung                                                          | 133       | 1         |
| besonderer Zungenschlag                                                     | 142       | 1         |
| klare Aussprache                                                            | 142       | 1         |
| langgezogene Aussprache                                                     | 142       | 1         |
| mir/ mich verwechseln                                                       | 230       | 1         |
| Gäiser Garl                                                                 | 321       | 1         |
| anders als Chemnitzer Dialekt                                               | 411       | 1         |
| sprechen weich                                                              | 412       | 1         |
| breit gemehrt                                                               | 412       | 1         |
| herber Tonfall                                                              | 412       | 1         |
| herzlich                                                                    | 422       | 1         |
| fast Hochdeutsch                                                            | 431       | 1         |
| dialektfrei aber schlechtes Deutsch                                         | 431       | 1         |
| gutes Deutsch                                                               | 431       | 1         |
| Leipziger Dialekt                                                           | 432       | 1         |
| nicht all zu sehr Sächsisch                                                 | 432       | 1         |
| Thüringisch                                                                 | 432       | 1         |
| Altmark                                                                     | 441       | 1         |
| bekannte Städte                                                             | 441       | 1         |
| zwischen weich und hart (zwischen Sächsisch und Berlinisch)                 | 442       | 1         |
| Staffellandschaft                                                           | 442       | 1         |
|                                                                             |           |           |
| Gesamtpunktwert                                                             |           | 47        |

Tabelle 65: Die assoziierten Einzelmerkmale der meißnischen Gruppe im Cluster 8

| Beschreibung                                  | Subgruppe | Punktwert |
|-----------------------------------------------|-----------|-----------|
| Fränkisch                                     | 432       | 6         |
| nicht aggressiv/ amüsan/ angenehm/ freundlich | 422       | 4         |
| Fränkisch-Bayerisch                           | 432       | 3         |
| Bayerischer Dialekt/ Bayerischer Touch        | 432       | 3         |
| schlecht verständlich                         | 142       | 2         |
| warm/ sehr lieblich                           | 412       | 2         |
| Hochdeutsch                                   | 431       | 2         |
| gerolltes R mit der Zunge                     | 123       | 1         |
| schnelle Aussprache                           | 131       | 1         |
| läuft extrem heraus                           | 142       | 1         |
| leicht verständlich                           | 142       | 1         |
| unverständlich                                | 142       | 1         |
| langgezogene Aussprache                       | 142       | 1         |
| basst scho                                    | 321       | 1         |
| man hört es                                   | 414       | 1         |
| Bauchgefühl Franken                           | 414       | 1         |
| unmöglich                                     | 422       | 1         |
| Sächsisch                                     | 432       | 1         |
| Vogtländisch                                  | 432       | 1         |
| Vogtländisch-Fränkisch                        | 432       | 1         |
| Gebirgsdialekt                                | 432       | 1         |
| Erzgebirge                                    | 441       | 1         |
| Oberfranken                                   | 441       | 1         |
|                                               |           |           |
| Gesamtpunktwert                               |           | 38        |

Tabelle 66: Die assoziierten Einzelmerkmale der meißnischen Gruppe im Cluster 9

| Beschreibung                                                                   | Subgruppe | Punktwert |
|--------------------------------------------------------------------------------|-----------|-----------|
| unangenehm/ doof/ grauselig/ nicht niedlich/ plump/<br>wenig Prestige          | 422       | 6         |
| icken                                                                          | 321       | 3         |
| freundlich/ herzlich/ klingt nett                                              | 422       | 3         |
| weichmachen von harten Buchstaben                                              | 121       | 2         |
| g > ch                                                                         | 123       | 2         |
| deutlich                                                                       | 142       | 2         |
| wa (nicht wahr?)                                                               | 312       | 2         |
| Merseburch (Merseburg)                                                         | 321       | 2         |
| Anhaltinisches Platt/ Sachsenanhaltinisch                                      | 432       | 2         |
| Berlinisch                                                                     | 432       | 2         |
| halb Sächsisch halb Berlinerisch/ sächsische Wörter und<br>Berliner Aussprache | 432       | 2         |
| k > g                                                                          | 123       | 1         |
| Sing-Sang                                                                      | 132       | 1         |
| besondere Betonung                                                             | 133       | 1         |
| [a], [ä] betont                                                                | 133       | 1         |

|                         |     |    |
|-------------------------|-----|----|
| kehligte Aussprache     | 142 | 1  |
| klare Aussprache        | 142 | 1  |
| langgezogene Aussprache | 142 | 1  |
| Grüß Gott               | 312 | 1  |
| herber Tonfall          | 412 | 1  |
| kühl                    | 412 | 1  |
| geschmolzen             | 412 | 1  |
| kraftvoll               | 412 | 1  |
| fast Hochdeutsch        | 431 | 1  |
| gutes Deutsch           | 431 | 1  |
| Bayerisch               | 432 | 1  |
| Leipziger Dialekt       | 432 | 1  |
| Thüringisch             | 432 | 1  |
| Altmark                 | 441 | 1  |
| Staffellandschaft       | 442 | 1  |
|                         |     |    |
| Gesamtpunktwert         |     | 47 |

Tabelle 67: Die assoziierten Einzelmerkmale der meißnischen Gruppe im Cluster 10

| Beschreibung                                                                                                                                                | Subgruppe | Punktwert |
|-------------------------------------------------------------------------------------------------------------------------------------------------------------|-----------|-----------|
| Singen/ Tonfall anders/ gesungen/ Sing-Sang/ singen<br>anders/ Klang/ melodisch/ sächsischer Tonfall/ singen<br>nicht/ singen nicht so stark wie in Dresden | 132       | 82        |
| schwer verständlich/ schlecht verständlich/ nuscheln/<br>Unterkiefer runter/ unsauber gesprochen/ unverständlich                                            | 142       | 39        |
| Erzgebirgisch/ intensives Erzgebirgisch/ ähnlich wie<br>Erzgebirgisch/ Richtung Erzgebirgisch                                                               | 431       | 36        |
| man hört es                                                                                                                                                 | 414       | 27        |
| härter/ harter Dialekt/ härteres Sächsisch/ bisschen härter<br>als Sächsisch                                                                                | 412       | 22        |
| andere Begriffe/ andere Bezeichnungen/ besondere<br>Worte/ bestimmte Begriffe                                                                               | 311       | 20        |
| herzlich/ klingt freundlicher als Leipziger Dialekt/<br>angenehmer Dialekt/ anziehend/ niedlicher als Leipziger<br>Aussprache                               | 422       | 20        |
| Vogtländisch                                                                                                                                                | 432       | 19        |
| langgezogene Aussprache/ ziehen Wörter lang/ gedehnt                                                                                                        | 142       | 13        |
| sprechen verkürzt/ zusammengezogen                                                                                                                          | 142       | 9         |
| warm                                                                                                                                                        | 412       | 9         |
| Erzgebirge                                                                                                                                                  | 441       | 9         |
| drehen Buchstaben/ Buchstaben verändert                                                                                                                     | 111       | 8         |
| klingt geleiert/ leiern Endungen/ Geleiere                                                                                                                  | 132       | 8         |
| kürzen viel ab/ Endungen weg/ kürzen Wörter ab                                                                                                              | 220       | 8         |
| derbe Aussprache/ derbes Sächsisch                                                                                                                          | 412       | 8         |
| fast identisch mit Osterzgebirgisch/ Ostererzgebirgisch                                                                                                     | 432       | 8         |
| verständlich                                                                                                                                                | 142       | 7         |
| isch                                                                                                                                                        | 321       | 7         |
| hässlich/ grauenvoll                                                                                                                                        | 422       | 7         |
| erzgebirgisches Sächsisch                                                                                                                                   | 432       | 7         |
| Chemnitzer Ecke                                                                                                                                             | 441       | 7         |
| Satz langziehen/ ziehen Sätze zusammen                                                                                                                      | 240       | 6         |
| Thüringisch/ thüringischer Einschlag                                                                                                                        | 432       | 6         |

|                                                                  |     |   |
|------------------------------------------------------------------|-----|---|
| Sächsisch/ typisches Sächsisch                                   | 432 | 6 |
| o > u                                                            | 114 | 5 |
| Konsonanten anders/ Konsonanten anders geformt                   | 122 | 5 |
| k > g                                                            | 123 | 5 |
| nüsch (nicht)                                                    | 321 | 5 |
| Bam (Baum)                                                       | 321 | 5 |
| ne (eine)                                                        | 321 | 5 |
| habsch (habe ich)                                                | 321 | 5 |
| wie Jens Weißflog/ wie die Randfichten                           | 414 | 5 |
| direkt in Dresden nicht so schlimm/ hört sich nicht so fein an   | 422 | 5 |
| Vokale anders                                                    | 112 | 4 |
| a > ou                                                           | 114 | 4 |
| sch-Laute                                                        | 123 | 4 |
| Endsilben unbetont                                               | 133 | 4 |
| -el                                                              | 220 | 4 |
| nu (ja)                                                          | 312 | 4 |
| neje (nein)                                                      | 321 | 4 |
| Laibsch                                                          | 321 | 4 |
| mai Gudster                                                      | 321 | 4 |
| breit gesprochen                                                 | 412 | 4 |
| breitgefächertes Erzgebirgisch                                   | 412 | 4 |
| klingt entspannter als Leipziger Dialekt                         | 421 | 4 |
| Übergangsgebiet/ Mischung                                        | 442 | 4 |
| Buchstaben verschlucken                                          | 111 | 3 |
| am Ende des Satzes Stimme hoch/ sprechen tiefer                  | 132 | 3 |
| ohne Modulation                                                  | 141 | 3 |
| Wo de Hos'n Hus'n has'n und de Hus'n Hos'n sei do sei mir drham. | 313 | 3 |
| eigene Art Sächsisch                                             | 411 | 3 |
| fast wie Chemnitzer Aussprache                                   | 432 | 3 |
| Vogtländisch-Erzgebirgisch                                       | 432 | 3 |
| Oberlausitz                                                      | 441 | 3 |
| Westerzgebirge                                                   | 441 | 3 |
| o > a                                                            | 114 | 2 |
| rollendes R                                                      | 123 | 2 |
| sprechen ganz schnell                                            | 131 | 2 |
| die Art der Aussprache der Worte                                 | 142 | 2 |
| quäken so                                                        | 142 | 2 |
| vermischt mit Bayerisch                                          | 432 | 2 |
| Gebirgssächssisch                                                | 432 | 2 |
| Mischung aus Thüringisch und Sächsisch                           | 432 | 2 |
| gurgeln Laute                                                    | 121 | 1 |
| Sprechgeschwindigkeit langsamer                                  | 131 | 1 |
| betonen das [s]                                                  | 133 | 1 |
| klingt genauer                                                   | 141 | 1 |
| Glück auf                                                        | 312 | 1 |
| nö (nein)                                                        | 321 | 1 |
| ni (nicht)                                                       | 321 | 1 |
| och (auch)                                                       | 321 | 1 |
| Oge (Auge)                                                       | 321 | 1 |
| ma (mal)                                                         | 321 | 1 |
| bisschen Rollen                                                  | 411 | 1 |

|                                                       |     |     |
|-------------------------------------------------------|-----|-----|
| bisschen Hochdeutsch                                  | 431 | 1   |
| Lausitzer Einschlag                                   | 432 | 1   |
| Randsächsisch                                         | 432 | 1   |
| nördlicher Übergang zwischen Berlinerisch und Bautzen | 432 | 1   |
| Richtung Niederschlesisch                             | 432 | 1   |
| vogtländisches Sächsisch                              | 432 | 1   |
| Vogtländisch-Fränkisch                                | 432 | 1   |
| vogtländisch-bayerisch-erzgebirgischer Mischmasch     | 432 | 1   |
| Thüringer Wald                                        | 441 | 1   |
| Leipziger Raum                                        | 441 | 1   |
| nördlich gelegen                                      | 442 | 1   |
|                                                       |     |     |
| Gesamtpunktwert                                       |     | 560 |

Tabelle 68: Die assoziierten Einzelmerkmale der lausitzischen Gruppe im Cluster 1

| Beschreibung                                                                                                                                                                      | Subgruppe | Punktwert |
|-----------------------------------------------------------------------------------------------------------------------------------------------------------------------------------|-----------|-----------|
| man hört es/ erkennt man an der Wortwahl                                                                                                                                          | 414       | 53        |
| langgezogene Aussprache/ gedehnt/ zerrig/ Worte werden gezogen/ mehrer alles/ ziehen das Sächsisch lang                                                                           | 142       | 44        |
| Singen/ Intonation anders/ singen nicht so/ Tonfall/ gesungen/ singend/ bisschen Sing-Sang/ melodische Sprache/ klingt anders/ singen nicht/ singen nicht so stark wie in Dresden | 132       | 40        |
| Sächsisch/ typisch Sächsisch/ halb Sächsisch/ leichtes Sächsisch/ durchdrungen vom Sächsischen                                                                                    | 432       | 31        |
| grauenvoll/ hässlich/ man sagt 'schlechtes Sächsisch'/ schnoddrig/ hört sich nicht so fein an/ ganz schlechtes Sächsisch                                                          | 422       | 26        |
| k > g                                                                                                                                                                             | 123       | 25        |
| undeutlich/ nuscheln/ schwer verständlich/ schlecht verständlich                                                                                                                  | 142       | 21        |
| Thüringisch/ halb Thüringisch/ ähnlich Thüringisch/ thüringischer Einschlag/ Thüringer Dialekt                                                                                    | 432       | 21        |
| Buchstaben verschlucken/ ziehen Buchstaben lang/ Buchstaben verändert/ drehen Buchstaben                                                                                          | 111       | 17        |
| herzlich/ gemütlich                                                                                                                                                               | 422       | 16        |
| verständlich/ klar/ deutlich                                                                                                                                                      | 142       | 15        |
| Endungen verschluckt/ Endungen weg                                                                                                                                                | 220       | 13        |
| warm/ wärmer                                                                                                                                                                      | 412       | 13        |
| g > j                                                                                                                                                                             | 123       | 12        |
| Unterkiefer runter/ Unterkiefer hängen lassen                                                                                                                                     | 142       | 12        |
| Sachsenanhaltinisch/ Anhaltinisch                                                                                                                                                 | 432       | 12        |
| ohne Modulation                                                                                                                                                                   | 141       | 10        |
| anderes Sächsisch/ eigene Art Sächsisch                                                                                                                                           | 411       | 10        |
| kein gutes Deutsch/ können kein Hochdeutsch sprechen                                                                                                                              | 431       | 10        |
| Konsonantenerweichung                                                                                                                                                             | 122       | 9         |
| isch                                                                                                                                                                              | 321       | 8         |
| Übergang zwischen Sächsisch und Hochdeutsch/ Mischung aus Sächsisch und Hochdeutsch                                                                                               | 432       | 8         |
| plärren/ quäken so                                                                                                                                                                | 142       | 7         |
| nuff (hinauf)                                                                                                                                                                     | 321       | 7         |
| Leipziger Dialekt/ Leipziger Sächsisch                                                                                                                                            | 432       | 7         |
| Übergangsgebiet                                                                                                                                                                   | 442       | 7         |

|                                                         |     |   |
|---------------------------------------------------------|-----|---|
| manchmal Zwielaute                                      | 114 | 6 |
| Mitlaute anders                                         | 122 | 6 |
| -en verschluckt                                         | 220 | 6 |
| Geinich (König)                                         | 312 | 6 |
| kleechen (arbeiten)                                     | 312 | 6 |
| nüsch (nicht)                                           | 321 | 6 |
| nu (nun)                                                | 321 | 6 |
| ne (eine)                                               | 321 | 6 |
| habsch (habe ich)                                       | 321 | 6 |
| machn                                                   | 432 | 6 |
| p > b                                                   | 123 | 5 |
| Leiern                                                  | 132 | 5 |
| nu (ja)                                                 | 312 | 5 |
| Scheijks (abfällig für junger Mann)                     | 312 | 5 |
| ein Kessel Buntes                                       | 313 | 5 |
| nö (nein)                                               | 321 | 5 |
| Laibsch                                                 | 321 | 5 |
| jehen (gehen)                                           | 321 | 5 |
| Gaiser Garl                                             | 321 | 5 |
| mai Gudster                                             | 321 | 5 |
| direkt in Dresden nicht so schlimm                      | 422 | 5 |
| Hochdeutsch/ ähnelt dem Hochdeutschen                   | 431 | 5 |
| teilweise Berlinerisch/ etwas Berlinerisch              | 432 | 5 |
| wa (nicht wahr?)                                        | 312 | 4 |
| sprechen weich                                          | 412 | 4 |
| Richtung Hallenser/ Hallisch                            | 432 | 4 |
| Mischung zwischen Thüringisch und Sächsischanhaltinisch | 432 | 4 |
| Richtung Berlin                                         | 441 | 4 |
| Sprechgeschwindigkeit langsamer                         | 131 | 3 |
| Art der Aussprache der Worte/ andere Aussprache         | 142 | 3 |
| sprechen verkürzt/ kürzen Wörter ab                     | 142 | 3 |
| andere Begriffe                                         | 311 | 3 |
| ene (eine)                                              | 321 | 3 |
| ouch                                                    | 321 | 3 |
| kein richtiger Dialekt                                  | 411 | 3 |
| schnell                                                 | 412 | 3 |
| platt                                                   | 412 | 3 |
| regional kleinere Unterschiede                          | 431 | 3 |
| Mischung aus Sächsisch und Anhaltinisch                 | 432 | 3 |
| Thüringer Wald                                          | 441 | 3 |
| Erzgebirge                                              | 441 | 3 |
| Leipziger Raum                                          | 441 | 3 |
| Richtung Dresden                                        | 441 | 3 |
| am Ende des Satzes Stimme hoch                          | 132 | 2 |
| Endsilben unbetont                                      | 133 | 2 |
| betonen das [s]                                         | 133 | 2 |
| [t] betont                                              | 133 | 2 |
| klingt genauer                                          | 141 | 2 |
| ribor (herüber)                                         | 321 | 2 |
| och (auch)                                              | 321 | 2 |
| oge (Auge)                                              | 321 | 2 |
| ma (mal)                                                | 321 | 2 |
| icke                                                    | 321 | 2 |



|                                                                         |     |     |
|-------------------------------------------------------------------------|-----|-----|
| zwischen Thüringisch und Sächsisch                                      | 432 | 2   |
| Holzländisch                                                            | 432 | 2   |
| zwischen Dresden und Leipzig                                            | 442 | 2   |
| Staffellandschaft                                                       | 442 | 2   |
| Übergang Berlin und Sachsen                                             | 442 | 2   |
| Mischmasch                                                              | 442 | 2   |
| o > u                                                                   | 114 | 1   |
| reden schnell                                                           | 131 | 1   |
| sprechen tiefer                                                         | 132 | 1   |
| Grammatik                                                               | 210 | 1   |
| Dativ/Akkusativ verwechselt                                             | 230 | 1   |
| bei den Fleischer                                                       | 230 | 1   |
| mit die Kinder                                                          | 230 | 1   |
| mits Fahrrad fahren                                                     | 230 | 1   |
| mir/mich verwechseln                                                    | 230 | 1   |
| Wir fahren zu Hause                                                     | 230 | 1   |
| Satzstellung                                                            | 240 | 1   |
| Satz langziehen                                                         | 240 | 1   |
| gälle (nicht wahr?)                                                     | 312 | 1   |
| Glück auf                                                               | 312 | 1   |
| gä (nicht wahr?)                                                        | 312 | 1   |
| Sing mei Sachse sing                                                    | 313 | 1   |
| dette (das dort)                                                        | 321 | 1   |
| bam (Baum)                                                              | 321 | 1   |
| Hat der mir begrüßt? Nein mich. Also Ihnen? Nein Sie.<br>Also doch mir. | 321 | 1   |
| breite Aussprache                                                       | 412 | 1   |
| manchmal in bestimmten Wörtern Richtung Bayerisch                       | 432 | 1   |
| Dresdner Sächsisch                                                      | 432 | 1   |
| Erzgebirgisch                                                           | 432 | 1   |
| erzgebirgisches Sächsisch                                               | 432 | 1   |
| Niederlausitzer                                                         | 432 | 1   |
| Randsächsisch                                                           | 432 | 1   |
| geht ins Sorbische                                                      | 432 | 1   |
| thüringisches Sächsisch                                                 | 432 | 1   |
| Vogtländisch                                                            | 432 | 1   |
| Chemnitzer Ecke                                                         | 441 | 1   |
| Elbe-Elster-Kreis                                                       | 442 | 1   |
|                                                                         |     |     |
| Gesamtpunktwert                                                         |     | 707 |

Tabelle 69: Die assoziierten Einzelmerkmale der lausitzischen Gruppe im Cluster 2

| Beschreibung                                                                                           | Subgruppe | Punktwert |
|--------------------------------------------------------------------------------------------------------|-----------|-----------|
| rollendes R                                                                                            | 123       | 48        |
| Oberlausitzer Dialekt/ Oberlausitzisch/ Oberlausitzer Roller/<br>Oberlausitzer Edelroller              | 432       | 28        |
| eigene Mundart/ unterschiedlich/ anders als Dresdner Dialekt/<br>eigene Art Sächsisch/ anders          | 411       | 20        |
| Oberlausitz                                                                                            | 441       | 20        |
| Endungen verschlucken/ Endungen abgehackt/ Endungen<br>weg                                             | 220       | 16        |
| Sächsisch/ durchdrungen vom Sächsischen/ typisches<br>Sächsisch                                        | 432       | 16        |
| herzlich/ hört sich gut an/ direkt in Dresden nicht so<br>schlimm/ angenehmes Sächsisch                | 422       | 13        |
| Stimmlage/ Tonfall anders/ sächsischer Tonfall/ singen nicht/<br>Singen/ andere Stimmlage/ singen mehr | 132       | 12        |
| nu (ja)                                                                                                | 312       | 12        |
| Buchstaben verschlucken/ Buchstaben verändert                                                          | 111       | 10        |
| man hört es                                                                                            | 414       | 10        |
| andere Begriffe                                                                                        | 311       | 8         |
| Hochdeutsch                                                                                            | 431       | 8         |
| Sorbisch/ auch Sorbisch/ geht ins Sorbische                                                            | 432       | 8         |
| Staffellandschaft                                                                                      | 442       | 8         |
| Schlesisch/ geht teilweise ins Schlesische                                                             | 432       | 7         |
| Konsonantenerweichung                                                                                  | 122       | 6         |
| k > g                                                                                                  | 123       | 6         |
| zerrig/ langgezogene Aussprache/ ziehen Wörter lang/<br>Gemehre                                        | 142       | 6         |
| nüsch (nicht)                                                                                          | 321       | 6         |
| ne (eine)                                                                                              | 321       | 6         |
| habsch (habe ich)                                                                                      | 321       | 6         |
| regional kleinere Unterschiede                                                                         | 431       | 6         |
| Dresdner Sächsisch/ leichtes Dresdner Sächsisch                                                        | 432       | 6         |
| nicht langziehen                                                                                       | 142       | 5         |
| verkürzt/ zusammenziehen                                                                               | 142       | 5         |
| warm                                                                                                   | 412       | 5         |
| gurgeln Laute                                                                                          | 121       | 4         |
| ziehen einige Worte zusammen/ Abkürzungen                                                              | 220       | 4         |
| no (ja)                                                                                                | 312       | 4         |
| Laibsch                                                                                                | 321       | 4         |
| mai Gudster                                                                                            | 321       | 4         |
| Erzgebirgisch                                                                                          | 432       | 4         |
| Oberland                                                                                               | 441       | 4         |
| aufm Berg                                                                                              | 442       | 4         |
| Übergang zwischen Oberlausitz und Niederlausitz                                                        | 442       | 4         |
| kein rollendes R                                                                                       | 123       | 3         |
| schnelle Aussprache                                                                                    | 131       | 3         |
| Leiern                                                                                                 | 132       | 3         |
| klare Aussprache                                                                                       | 142       | 3         |
| plärren                                                                                                | 142       | 3         |
| verwechseln mir/ mich                                                                                  | 230       | 3         |
| ni (nicht)                                                                                             | 321       | 3         |
| nisch (nicht)                                                                                          | 321       | 3         |
| Heimat                                                                                                 | 414       | 3         |

|                                                                      |     |     |
|----------------------------------------------------------------------|-----|-----|
| kein gutes Deutsch                                                   | 431 | 3   |
| hochdeutsches Sächsisch                                              | 432 | 3   |
| Lausitzer/ gemäßigtes Lausitzisch                                    | 432 | 3   |
| ö > e                                                                | 114 | 2   |
| ü > i                                                                | 114 | 2   |
| i > ei                                                               | 114 | 2   |
| rollendes Sächsisch                                                  | 121 | 2   |
| rs > rsch                                                            | 123 | 2   |
| reden schneller als Bautzner und Dresdner                            | 131 | 2   |
| Betonung anders                                                      | 133 | 2   |
| Verdrehung                                                           | 142 | 2   |
| Grammatik                                                            | 210 | 2   |
| -la Endungen                                                         | 220 | 2   |
| viele Verkleinerungsformen                                           | 220 | 2   |
| gorni (gar nicht)                                                    | 321 | 2   |
| Ratt (Rad)                                                           | 321 | 2   |
| schwer erkennbar                                                     | 414 | 2   |
| hört sich nicht so fein an/ grauenvoll                               | 422 | 2   |
| niederschlesisches Lausitzisch                                       | 432 | 2   |
| Übergang zwischen Sächsisch und Oberlausitzisch                      | 432 | 2   |
| Richtung Dresden                                                     | 441 | 2   |
| Mischung                                                             | 442 | 2   |
| ohne Modulation                                                      | 141 | 2   |
| Unterkiefer runter                                                   | 142 | 1   |
| schlecht verständlich                                                | 142 | 1   |
| teilweise falsch mit unmöglichem Verdrehen von Artikeln              | 210 | 1   |
| verwechseln Dativ/Akkusativ                                          | 230 | 1   |
| bei den Fleischer                                                    | 230 | 1   |
| mit die Kinder                                                       | 230 | 1   |
| mits Fahrrad fahren                                                  | 230 | 1   |
| Wir fahren zu Hause.                                                 | 230 | 1   |
| Sing mei Sachse sing                                                 | 313 | 1   |
| newar (nicht wahr?)                                                  | 321 | 1   |
| nö (nein)                                                            | 321 | 1   |
| och (auch)                                                           | 321 | 1   |
| Oge (Auge)                                                           | 321 | 1   |
| icke                                                                 | 321 | 1   |
| Hat der mir gegrüßt? Nein mich. Also Ihnen? Nein Sie. Also doch mir. | 321 | 1   |
| sprechen weich                                                       | 412 | 1   |
| nicht so hart                                                        | 412 | 1   |
| bisschen härter als Sächsisch                                        | 412 | 1   |
| Richtung Hochdeutsch                                                 | 431 | 1   |
| lausitzer Hochdeutsch                                                | 432 | 1   |
| Niederlausitzer Dialekt                                              | 432 | 1   |
| Oberländer Dialekt                                                   | 432 | 1   |
| Thüringer Wald                                                       | 441 | 1   |
| Erzgebirge                                                           | 441 | 1   |
| Spreewald                                                            | 441 | 1   |
|                                                                      |     |     |
| Gesamtpunktwert                                                      |     | 444 |

Tabelle 70: Die assoziierten Einzelmerkmale der lausitzischen Gruppe im Cluster 3

| Beschreibung                                                                    | Subgruppe | Punktwert |
|---------------------------------------------------------------------------------|-----------|-----------|
| Hochdeutsch/ fast Hochdeutsch/ etwas Hochdeutsch/<br>halb Hochdeutsch           | 431       | 65        |
| verwechseln mir/ mich                                                           | 230       | 53        |
| Berlinerisch/ Richtung Berlinerisch                                             | 432       | 34        |
| hört sich nicht so fein an/ großkotzig/ niveaulos/<br>burschikos/ grauenvoll    | 422       | 27        |
| Niederlausitzer/ Niederlausitzer Dialekt                                        | 432       | 26        |
| Grammatik/ Grammatik schlecht/ Grammatikprobleme                                | 210       | 22        |
| och (auch)                                                                      | 321       | 22        |
| Tonfall anders/ Tonfall/ singen nicht/ Singen/ singen<br>mehr/ andere Stimmlage | 132       | 19        |
| mits Fahrrad fahren/ mits dem Fahrrad                                           | 230       | 17        |
| Sorbisch/ Richtung Sorbisch/ sorbischer Einschlag                               | 432       | 16        |
| Staffellandschaft/ Fächergebiet                                                 | 442       | 15        |
| schlechtes Hochdeutsch/ schlechtes Deutsch                                      | 431       | 13        |
| Lausitzer Einschlag                                                             | 432       | 13        |
| zwischen Berlinisch und Sächsisch                                               | 432       | 13        |
| verständlich/ klar/ klare Aussprache                                            | 142       | 12        |
| härter                                                                          | 412       | 12        |
| Brandenburgisch                                                                 | 432       | 12        |
| rollendes R; bisschen rollen                                                    | 123       | 11        |
| ni (nicht)                                                                      | 321       | 11        |
| ne (eine)                                                                       | 321       | 10        |
| icke/ ick                                                                       | 321       | 9         |
| man hört es                                                                     | 414       | 9         |
| Sächsisch/ typisch Sächsisch/ durchdrungen vom<br>Sächsischen                   | 432       | 9         |
| Spreewald                                                                       | 441       | 9         |
| Niederlausitzer Gegend/ Niederlausitz                                           | 441       | 9         |
| kein rollendes R                                                                | 123       | 8         |
| undeutlich/ schlecht verständlich                                               | 142       | 8         |
| Endungen weg                                                                    | 220       | 8         |
| ziehen einige Worte zusammen/ Abkürzungen                                       | 220       | 8         |
| nö (nein)                                                                       | 321       | 8         |
| Oge (Auge)                                                                      | 321       | 8         |
| ma (mal)                                                                        | 321       | 8         |
| weicher als Oberlausitzer Dialekt                                               | 412       | 8         |
| warme Aussprache                                                                | 412       | 8         |
| dynamischer                                                                     | 412       | 8         |
| ruhig                                                                           | 412       | 8         |
| zwischen Hochdeutsch und Berlinerisch                                           | 432       | 8         |
| teilweise falsch mit unmöglichem Verdrehen von Artikeln                         | 210       | 7         |
| dörfst (darfst)                                                                 | 321       | 7         |
| Lausitzer Hochdeutsch                                                           | 432       | 7         |
| Preußisch                                                                       | 432       | 7         |
| Wendisch                                                                        | 432       | 7         |
| ziehen Wörter/ ziehen Wörter lang/ zerrig/ langgezogene<br>Aussprache           | 142       | 6         |
| keiner verwechselt mir/ mich                                                    | 230       | 6         |
| als/wo ich im Urlaub war                                                        | 230       | 6         |
| nu (ja)                                                                         | 312       | 6         |
| Stulle (Scheibe Brot)                                                           | 312       | 6         |
| Schnitte (Scheibe Brot)                                                         | 312       | 6         |

|                                                                         |     |     |
|-------------------------------------------------------------------------|-----|-----|
| wes nich                                                                | 321 | 6   |
| wenig Akzent                                                            | 431 | 6   |
| Worte verdreht                                                          | 142 | 5   |
| verwechselln Dativ/Akkusativ                                            | 230 | 5   |
| bei den Fleischer                                                       | 230 | 5   |
| mit die Kinder                                                          | 230 | 5   |
| Wir fahren zu Hause.                                                    | 230 | 5   |
| Hat der mir gegrüßt? Nein mich. Also Ihnen? Nein Sie.<br>Also doch mir. | 321 | 5   |
| Buchstaben verschlucken/ Buchstaben verändert                           | 111 | 4   |
| einige Worte anders/ andere Begriffe                                    | 311 | 4   |
| wa-ey (nicht wahr?)                                                     | 312 | 4   |
| gorni (gar nicht)                                                       | 321 | 4   |
| fremd                                                                   | 411 | 4   |
| robust                                                                  | 412 | 4   |
| ohne Modulation                                                         | 141 | 3   |
| Unterkiefer runter                                                      | 142 | 3   |
| Endungen abgehackt/ Endungen verschluckt                                | 220 | 3   |
| derbe Ausdrücke                                                         | 412 | 3   |
| k > g                                                                   | 123 | 2   |
| verkürzt                                                                | 142 | 2   |
| nüsch (nicht)                                                           | 321 | 2   |
| habsch (habe ich)                                                       | 321 | 2   |
| unterschiedlich/ anders                                                 | 411 | 2   |
| Heimat                                                                  | 414 | 2   |
| Oberlausitzisch                                                         | 432 | 2   |
| Richtung Dresden                                                        | 441 | 2   |
| Elbe-Elster-Kreis                                                       | 442 | 2   |
| Übergangsgebiet                                                         | 442 | 2   |
| Übergang zwischen Oberlausitz und Niederlausitz                         | 442 | 2   |
| Leiern                                                                  | 132 | 1   |
| plärren                                                                 | 142 | 1   |
| no (ja)                                                                 | 312 | 1   |
| leichtes Dresdner Sächsisch                                             | 432 | 1   |
| nördlicher Übergang zwischen Berlinerisch und Bautzen                   | 432 | 1   |
| Übergang zwischen Sächsisch und Oberlausitz                             | 432 | 1   |
| Niederschlesisch                                                        | 432 | 1   |
| nördlich gelegen                                                        | 442 | 1   |
| Übergangsgebiet nach Leipzig                                            | 442 | 1   |
|                                                                         |     |     |
| Gesamtpunktwert                                                         |     | 744 |

Tabelle 71: Die assoziierten Einzelmerkmale der lausitzischen Gruppe im Cluster 4

| Beschreibung                                                                                                                                                | Subgruppe | Punktwert |
|-------------------------------------------------------------------------------------------------------------------------------------------------------------|-----------|-----------|
| Singen/ Stimmelage/ sächsischer Tonfall/ Tonfall anders/ gesungen/ andere Sprachmelodie/ Intonation/ besondere Melodie/ melodisch/ klingt anders/ Sing-Sang | 132       | 61        |
| man hört es/ erkennt man sofort                                                                                                                             | 414       | 52        |
| langgezogene Aussprache/ zerrig/ ziehen Wörter lang/ Gemehre/ gemehrt/ langmehren/ gedehnt                                                                  | 142       | 47        |
| Sächsisch/ typisch Sächsisch/ Ursächsisch/ durchdrungen vom Sächsischen                                                                                     | 432       | 27        |
| angenehmes Sächsisch/ angenehmer Dialekt/ herzlich/ gemütlich/ anziehend                                                                                    | 422       | 19        |
| Dresdner Sächsisch                                                                                                                                          | 432       | 15        |
| plärren/ quäken so                                                                                                                                          | 142       | 12        |
| sprechen weich/ klingt weicher/ weicher als Erzgebirgisch                                                                                                   | 412       | 12        |
| Endungen verschlucken/ Endungen weg                                                                                                                         | 220       | 11        |
| grauenvoll/ unattraktiv/ hässlich                                                                                                                           | 422       | 11        |
| k > g                                                                                                                                                       | 123       | 10        |
| andere Begriffe/ eigene Worte                                                                                                                               | 311       | 10        |
| Konsonantenerweichung                                                                                                                                       | 122       | 7         |
| Sing mei Sachse sing.                                                                                                                                       | 313       | 7         |
| Dräsdn                                                                                                                                                      | 321       | 7         |
| meine Gudste/ mai Gudster                                                                                                                                   | 321       | 7         |
| regional kleinere Unterschiede                                                                                                                              | 431       | 7         |
| Mischung/ Übergangsgebiet/ Fächergebiet                                                                                                                     | 442       | 7         |
| Leiern                                                                                                                                                      | 132       | 6         |
| betonen das [s]                                                                                                                                             | 133       | 6         |
| ohne Modulation                                                                                                                                             | 141       | 6         |
| Unterkiefer runter                                                                                                                                          | 142       | 6         |
| Art der Aussprache der Worte                                                                                                                                | 142       | 6         |
| verständlich/ klare Aussprache                                                                                                                              | 142       | 6         |
| kürzen Wörter ab                                                                                                                                            | 220       | 6         |
| warm                                                                                                                                                        | 412       | 6         |
| kein gutes Deutsch                                                                                                                                          | 431       | 6         |
| Erzgebirgisch                                                                                                                                               | 432       | 6         |
| Buchstaben verschlucken/ Buchstaben verändert/ drehen Buchstaben                                                                                            | 111       | 5         |
| o > a                                                                                                                                                       | 114       | 5         |
| ne (eine)                                                                                                                                                   | 321       | 5         |
| schwer erkennbar                                                                                                                                            | 414       | 5         |
| wie die Randfichten                                                                                                                                         | 414       | 5         |
| direkt in Dresden nicht so schlimm/ hört sich nicht so fein an                                                                                              | 422       | 5         |
| Gebirgssächsisch                                                                                                                                            | 432       | 5         |
| Lausitzer Einschlag/ gemäßigt Lausitzerisch                                                                                                                 | 432       | 5         |
| ai > e                                                                                                                                                      | 114       | 4         |
| ch > sch                                                                                                                                                    | 123       | 4         |
| am Ende des Satzes Stimme hoch                                                                                                                              | 132       | 4         |
| -le hinten ran                                                                                                                                              | 220       | 4         |
| -en > -ne                                                                                                                                                   | 220       | 4         |
| verwechseln mir/mich                                                                                                                                        | 230       | 4         |
| nu (ja)                                                                                                                                                     | 312       | 4         |
| nüsch (nicht)                                                                                                                                               | 321       | 4         |
| habsch (habe ich)                                                                                                                                           | 321       | 4         |
| anderes Sächsisch/ eigene Art Sächsisch                                                                                                                     | 411       | 4         |

|                                            |     |     |
|--------------------------------------------|-----|-----|
| fast Hochdeutsch/ Hochdeutsch              | 431 | 4   |
| ähnlich wie Leipzigerisch aber sauberer    | 432 | 4   |
| Sächsische Schweiz                         | 441 | 4   |
| p > b                                      | 123 | 3   |
| rollendes R                                | 123 | 3   |
| schwer verständlich/ schlecht verständlich | 142 | 3   |
| Laibsch                                    | 321 | 3   |
| och (auch)                                 | 321 | 3   |
| Gaiser Garl                                | 321 | 3   |
| Kauderwelsch                               | 411 | 3   |
| breitlaatzschen                            | 412 | 3   |
| zwischen Erzgebirgisch und Dresdnerisch    | 432 | 3   |
| rollendes Sächsisch                        | 121 | 2   |
| Betonung anders                            | 133 | 2   |
| grammatisch sicherer als Cottbus           | 210 | 2   |
| nö (nein)                                  | 321 | 2   |
| Oge (Auge)                                 | 321 | 2   |
| ma (mal)                                   | 321 | 2   |
| isch                                       | 321 | 2   |
| derbe Aussprache/ derbes Sächsisch         | 412 | 2   |
| Richtung Berlinerisch                      | 432 | 2   |
| Sorbisch/ geht ins Sorbische               | 432 | 2   |
| Erzgebirge                                 | 441 | 2   |
| Thür. Wald                                 | 441 | 2   |
| zwischen Halle und Leipzig                 | 442 | 2   |
| o > u                                      | 114 | 2   |
| Sprechgeschwindigkeit langsamer            | 131 | 1   |
| reden schnell                              | 131 | 1   |
| Endsilben unbetont                         | 133 | 1   |
| Satz langziehen                            | 240 | 1   |
| no (ja)                                    | 312 | 1   |
| neje (nein)                                | 321 | 1   |
| ni (nicht)                                 | 321 | 1   |
| nuff (hinauf)                              | 321 | 1   |
| Bam (Baum)                                 | 321 | 1   |
| eigene Mundart                             | 411 | 1   |
| bisschen härter als Sächsisch              | 412 | 1   |
| Oberlausitzisch                            | 432 | 1   |
| Osterzgebirgisch                           | 432 | 1   |
| Randsächsisch                              | 432 | 1   |
| Vogtländisch                               | 432 | 1   |
| Wendisch                                   | 432 | 1   |
| Holzländisch                               | 432 | 1   |
| Oberlausitz                                | 441 | 1   |
| Spreewald                                  | 441 | 1   |
| Chemnitzer Ecke                            | 441 | 1   |
| Übergang Berlin und Sachsen                | 442 | 1   |
| Übergang ins Osterzgebirge                 | 442 | 1   |
|                                            |     |     |
| Gesamtpunktwert                            |     | 558 |

Tabelle 72: Die assoziierten Einzelmerkmale der lausitzischen Gruppe im Cluster 5

| Beschreibung                                                                                  | Subgruppe | Punktwert |
|-----------------------------------------------------------------------------------------------|-----------|-----------|
| Thüringisch/ halb Thüringisch/ thüringischer Einschlag                                        | 432       | 33        |
| Singen/ melodische Sprache/ klingt anders/ singend/<br>melodisch/ tonfall/ Klang/ singen mehr | 132       | 18        |
| gemütlich/ herzlich/ niedlicher als Leipzig/ klingt<br>angenehm/ klingt netter/ niedlich      | 422       | 11        |
| Bayerisch/ bayerischer Einschlag/ manchmal in<br>bestimmten Worten Richtung Bayerisch         | 432       | 11        |
| verständlich/ klare Aussprache                                                                | 142       | 7         |
| Übergangsbereich/ Mischmasch                                                                  | 442       | 7         |
| warm/ wärmer                                                                                  | 412       | 6         |
| man hört es                                                                                   | 414       | 6         |
| halb Sächsisch/ Randsächsisch                                                                 | 432       | 6         |
| gälle (nicht wahr?)                                                                           | 312       | 5         |
| gä (nicht wahr?)                                                                              | 312       | 5         |
| grauenvoll/ ganz schlechtes Sächsisch/ unmännlich                                             | 422       | 4         |
| Übergang zwischen Sächsisch und Hochdeutsch                                                   | 432       | 4         |
| zwischen Thüringisch und Sächsisch                                                            | 432       | 4         |
| Vogtländisch                                                                                  | 432       | 4         |
| ar/er > a(o)                                                                                  | 114       | 3         |
| Konsonanten anders geformt                                                                    | 122       | 3         |
| letzte Silbe hochgezogen                                                                      | 133       | 3         |
| klingt genauer                                                                                | 141       | 3         |
| schwer verständlich/ unverständlich                                                           | 142       | 3         |
| kein richtiger Dialekt                                                                        | 411       | 3         |
| Fränkisch                                                                                     | 432       | 3         |
| thüringisches Sächsisch                                                                       | 432       | 3         |
| rollendes R                                                                                   | 123       | 2         |
| ohne Modulation                                                                               | 141       | 2         |
| Unterkiefer runter                                                                            | 142       | 2         |
| kürzen viel ab/ verkürzte Wörter                                                              | 220       | 2         |
| bestimmte Begriffe                                                                            | 311       | 2         |
| nu (ja)                                                                                       | 312       | 2         |
| Laibsch                                                                                       | 321       | 2         |
| mai Gudster                                                                                   | 321       | 2         |
| eigene Art Sächsisch                                                                          | 411       | 2         |
| härter/ harte Aussprache                                                                      | 412       | 2         |
| direkt in Dresden nicht so schlimm                                                            | 422       | 2         |
| ähnelt Hochdeutsch                                                                            | 431       | 2         |
| Richtung Bayerisch                                                                            | 432       | 2         |
| typisch Sächsisch                                                                             | 432       | 2         |
| Holzländisch                                                                                  | 432       | 2         |
| Bayern                                                                                        | 441       | 2         |
| thüringischer Bereich                                                                         | 441       | 2         |
| Franken                                                                                       | 441       | 2         |
| reden schnell                                                                                 | 131       | 1         |
| ziehen Wörter lang                                                                            | 142       | 1         |
| wa-ey (nicht wahr?)                                                                           | 312       | 1         |
| gscheit (gescheit)                                                                            | 321       | 1         |
| ick                                                                                           | 321       | 1         |
| isch                                                                                          | 321       | 1         |
| basst scho                                                                                    | 321       | 1         |



|                                                   |     |     |
|---------------------------------------------------|-----|-----|
| fremd                                             | 411 | 1   |
| robust                                            | 412 | 1   |
| rustikal                                          | 412 | 1   |
| wesshaft                                          | 413 | 1   |
| westdeutscher Dialekt etwas klarer                | 413 | 1   |
| wie Jens Weißflog                                 | 414 | 1   |
| Nordbayerisch                                     | 432 | 1   |
| Richtung Berlinerisch                             | 432 | 1   |
| bisschen wie Erzgebirgisch                        | 432 | 1   |
| Oberfränkisch                                     | 432 | 1   |
| Hallisch                                          | 432 | 1   |
| thüringisches Vogtländisch                        | 432 | 1   |
| Vogtländisch-Fränkisch                            | 432 | 1   |
| vogtländisch-bayerisch-erzgebirgischer Mischmasch | 432 | 1   |
| Beginn von Bayern                                 | 441 | 1   |
| Leipziger Raum                                    | 441 | 1   |
| Chemnitzer Ecke                                   | 441 | 1   |
| Westen                                            | 442 | 1   |
|                                                   |     |     |
| Gesamtpunktwert                                   |     | 216 |

Tabelle 73: Die assoziierten Einzelmerkmale der lausitzischen Gruppe im Cluster 6

| Beschreibung                             | Subgruppe | Punktwert |
|------------------------------------------|-----------|-----------|
| melodisch/ klingt anders/ Singen         | 132       | 3         |
| deutlich/ klare Aussprache/ klar         | 142       | 3         |
| man hört es                              | 414       | 3         |
| Thüringisch                              | 432       | 3         |
| ziehen Sächsisch lang/ ziehen die Wörter | 142       | 2         |
| Anhaltinisch                             | 432       | 2         |
| Lausitzer/ Lausitzer Einschlag           | 432       | 2         |
| Übergangsgebiet                          | 442       | 2         |
| k > g                                    | 123       | 1         |
| [t] betont                               | 133       | 1         |
| Endungen weg                             | 220       | 1         |
| gä (nicht wahr?)                         | 312       | 1         |
| nö (nein)                                | 321       | 1         |
| och (auch)                               | 321       | 1         |
| Oge (Auge)                               | 321       | 1         |
| ma (mal)                                 | 321       | 1         |
| bisschen Rollen                          | 411       | 1         |
| anderes Sächsisch                        | 411       | 1         |
| bisschen härter als Sächsisch            | 412       | 1         |
| wie Jens Weißflog                        | 414       | 1         |
| hört sich nicht so fein an               | 422       | 1         |
| bisschen Hochdeutsch                     | 431       | 1         |
| teilweise Berlinerisch                   | 432       | 1         |
| Erzgebirgisch                            | 432       | 1         |
| Richtung Hallenser                       | 432       | 1         |
| Randsächsisch                            | 432       | 1         |
| zwischen Anhaltinisch und Sächsisch      | 432       | 1         |

|                                             |     |    |
|---------------------------------------------|-----|----|
| Übergang zwischen Sächsisch und Hochdeutsch | 432 | 1  |
| Richtung Berlin                             | 441 | 1  |
| Mischung Thüringen und Sachsen-Anhalt       | 442 | 1  |
|                                             |     |    |
| Gesamtpunktwert                             |     | 42 |

Tabelle 74: Die assoziierten Einzelmerkmale der lausitzischen Gruppe im Cluster 7

| Beschreibung                                                                                                                                                        | Subgruppe | Punktwert |
|---------------------------------------------------------------------------------------------------------------------------------------------------------------------|-----------|-----------|
| Thüringisch/ Thüringer Dialekt                                                                                                                                      | 432       | 46        |
| eigene Melodie/ anderer Klang/ Tonfall/ melodisch/<br>Sächsisch mit breiterem Tonfall/ Singen/ Tonfall nicht<br>Sächsisch/ Sing-Sang/ klingt bisschen Erzgebirgisch | 132       | 28        |
| Thüringen                                                                                                                                                           | 441       | 22        |
| Sächsisch/ Sächsisch und was anderes/ ähnlich dem<br>Sächsischen/ sächsische Nuancen/ Mischsächsisch/<br>typisches Sächsisch                                        | 432       | 20        |
| Silben besser ausgesprochen/ eher klarer/ verständlicher<br>als tiefes Sächsisch/ deutlich/ klar/ kein nuscheln                                                     | 142       | 16        |
| man hört es/ erkennt man sofort                                                                                                                                     | 414       | 14        |
| gä (nicht wahr?)                                                                                                                                                    | 312       | 13        |
| liebenswert/ angenehm/ gemütlich                                                                                                                                    | 422       | 9         |
| relativ Hochdeutsch/ mehr Hochdeutsch/ Hochdeutsch                                                                                                                  | 431       | 9         |
| Mischmasch von Thüringisch und Sächsisch/<br>thüringisches Sächsisch/ Sächsisch mit thüringischem<br>Einschlag/ Thürisches gell und Sächsisch in der Melodie        | 432       | 9         |
| k > g                                                                                                                                                               | 123       | 7         |
| langgezogene Aussprache/ ziehen Wörter lang und<br>auseinander/ mehrig gesprochen                                                                                   | 142       | 7         |
| Buchstaben verschlucken/ andere Buchstaben                                                                                                                          | 111       | 6         |
| Farbe der Vokale anders/ andere Vokale                                                                                                                              | 112       | 6         |
| Übergangsgebiet/ Mischgegend                                                                                                                                        | 442       | 6         |
| Stimme hell                                                                                                                                                         | 132       | 5         |
| Stimme ordentlich                                                                                                                                                   | 142       | 5         |
| gälle nach Sätzen                                                                                                                                                   | 312       | 5         |
| Kleße (Klöße)                                                                                                                                                       | 321       | 5         |
| ämal (einmal)                                                                                                                                                       | 321       | 5         |
| Ostthüringisch                                                                                                                                                      | 432       | 5         |
| Vogtländisch-Erzgebirgisch                                                                                                                                          | 432       | 5         |
| e > a                                                                                                                                                               | 114       | 4         |
| schönes rollendes R                                                                                                                                                 | 123       | 4         |
| andere Betonung als Sächsisch                                                                                                                                       | 133       | 4         |
| bestimmte Begriffe                                                                                                                                                  | 311       | 4         |
| Muttschekiepchen (Marienkäfer)                                                                                                                                      | 312       | 4         |
| jegangen/ jejangen/ jelb/ Jummi (Gummi)                                                                                                                             | 321       | 4         |
| dumpfer                                                                                                                                                             | 412       | 4         |
| Erzgebirgisch                                                                                                                                                       | 432       | 4         |
| Vokale verschlucken                                                                                                                                                 | 112       | 3         |
| klings nicht so Sächsisch in den Konsonanten                                                                                                                        | 122       | 3         |
| Konsonanten weich/ Konsonantenerweichung                                                                                                                            | 122       | 3         |
| Nuschel (Kopf)                                                                                                                                                      | 312       | 3         |
| bisschen Bayerisch                                                                                                                                                  | 432       | 3         |
| Anhaltinisch/ Sachsenanhaltinisch                                                                                                                                   | 432       | 3         |

|                                                                |     |     |
|----------------------------------------------------------------|-----|-----|
| rollt etwas                                                    | 121 | 2   |
| Umgang mit den Konsonanten                                     | 122 | 2   |
| g > j                                                          | 123 | 2   |
| j > sch                                                        | 123 | 2   |
| Unterkiefer runter                                             | 142 | 2   |
| Endungen von Verben weg                                        | 220 | 2   |
| Decher (abfällig für kleine Kinder)                            | 312 | 2   |
| Schacke (Jacke)                                                | 321 | 2   |
| Schogurt (Jogurt)                                              | 321 | 2   |
| heeme (zu Hause)                                               | 321 | 2   |
| fast normal                                                    | 411 | 2   |
| nichts Besonderes                                              | 411 | 2   |
| wenig Sächsisch/ weniger Sächsisch als in Dresden oder Leipzig | 411 | 2   |
| anders als Leipzigerisch/ kleine Unterschiede                  | 411 | 2   |
| sprechen weich                                                 | 412 | 2   |
| nicht hart                                                     | 412 | 2   |
| derbes Sächsisch                                               | 412 | 2   |
| dörflich                                                       | 422 | 2   |
| Sprache von Erfurt                                             | 432 | 2   |
| Leipziger Sächsisch                                            | 432 | 2   |
| A9-Stapel                                                      | 442 | 2   |
| Grenze zwischen Thüringen und Sachsen                          | 442 | 2   |
| a > ou                                                         | 114 | 1   |
| t > d                                                          | 123 | 1   |
| nu (ja)                                                        | 312 | 1   |
| Bemme (Scheibe Brot)                                           | 312 | 1   |
| Brätschen (Brötchen)                                           | 312 | 1   |
| gaffee                                                         | 321 | 1   |
| Wurscht                                                        | 321 | 1   |
| breit                                                          | 412 | 1   |
| nicht so gezogen wie Sächsisch                                 | 412 | 1   |
| sprechen ganz böse                                             | 422 | 1   |
| ähnlich wie Chemnitz                                           | 432 | 1   |
| Hallisch                                                       | 432 | 1   |
| ähnlich wie Halle und Magdeburger Dialekt                      | 432 | 1   |
| Pießnisch (Pössneckisch)                                       | 432 | 1   |
| Mischung Berlinern und Sächseln                                | 432 | 1   |
| Mischung Sächsisch-Erzgebirgisch                               | 432 | 1   |
| tendiert bisschen zum Hallischen und Ostthüringischen          | 432 | 1   |
| Vogtländisch                                                   | 432 | 1   |
| aus dem ehemaligen Osten                                       | 441 | 1   |
| Erzgebirge                                                     | 441 | 1   |
| Bad Gottleuba ist Grenze zum Sächsischen                       | 441 | 1   |
| Richtung Borna                                                 | 441 | 1   |
| Großraum Halle                                                 | 441 | 1   |
|                                                                |     |     |
| Gesamtpunktwert                                                |     | 370 |

Tabelle 75: Die assoziierten Einzelmerkmale der osterländischen Gruppe im Cluster 1

| Beschreibung                                                                                                           | Subgruppe | Punktwert |
|------------------------------------------------------------------------------------------------------------------------|-----------|-----------|
| anders als Leipziger Dialekt/ anders als Dresdner Dialekt/ weniger Sächsisch als in Dresden und Leipzig                | 411       | 48        |
| Südsachsen                                                                                                             | 441       | 43        |
| Erzgebirgisch/ typisch Westerbirgisch/ nicht mehr ganz erzgebirgisch/ ähnlich wie erzgebirgische aber nicht so singend | 432       | 38        |
| man hört es/ erkennt man                                                                                               | 414       | 35        |
| Sing-Sang/ eigener Klang/ hört man am Klang/ ganz doll singend/ Sprachmelodie/ schöne Sprachmelodie/ Singen/ melodisch | 132       | 32        |
| liebenswert/ sympathischer Klang/ niedlich/ klingt nett/ angenehm/ höre ich gern/ lustig                               | 422       | 24        |
| Vogtländisch/ Vuuchtländisch                                                                                           | 432       | 22        |
| andere Ausdrücke/ bestimmte Begriffe/ andere Worte als Leipziger Sächsisch/ Redewendungen anders                       | 311       | 21        |
| Thüringen                                                                                                              | 441       | 20        |
| alles langezogen/ ziehen Wörter lang und auseinander/ mehrig gesprochen                                                | 142       | 14        |
| Buchstaben verschlucken/ andere Buchstaben/ Lautfärbung                                                                | 111       | 11        |
| bessere Aussprache des R/ Silben besser ausgesprochen/ verständlicher als tiefes Sächsisch/ verständlicher             | 142       | 11        |
| sprechen ganz böse/ brutal/ reudiger/ klingt arrogant/ ganz schlimm                                                    | 422       | 11        |
| Übergangsgebiet/ Mischung                                                                                              | 442       | 11        |
| ganz eigentümlich/ eigene Mundart                                                                                      | 411       | 10        |
| Sächsisch                                                                                                              | 432       | 10        |
| Extrasprache gehört aber zum Sächsischen/ Sächsisch und was anderes                                                    | 432       | 10        |
| schwer verständlich/ unverständlich/ schlechte Aussprache/ unklar/ nuscheln                                            | 142       | 9         |
| verkürzt/ verschlucken viel/ weglassen von Silben und andere werden hinzugefügt                                        | 142       | 9         |
| Wo de Hos'n Hus'n has'n und de Hus'n Hos'n sei do sei mir drham.                                                       | 313       | 9         |
| schü (schön)                                                                                                           | 321       | 9         |
| Arzgebirgisch/ Arzgebirg                                                                                               | 321       | 9         |
| Vogtländisch-Erzgebirgisch                                                                                             | 432       | 9         |
| k > g                                                                                                                  | 123       | 8         |
| breit/ breites Sächsisch/ breit gesprochene Silben                                                                     | 412       | 8         |
| a > o                                                                                                                  | 114       | 7         |
| die aus'm Gebirge                                                                                                      | 415       | 7         |
| Erzgebirgler                                                                                                           | 415       | 7         |
| Erzgebirge/ Vogtland/ Erzgebirge-Vogtland                                                                              | 441       | 7         |
| o > u                                                                                                                  | 114       | 6         |
| rollendes R                                                                                                            | 123       | 6         |
| Endungen anders                                                                                                        | 220       | 6         |
| Go Trabi Go                                                                                                            | 313       | 6         |
| Avdentslieder                                                                                                          | 313       | 6         |
| ma(o) (Mann)                                                                                                           | 321       | 6         |
| nah am Bayerischen                                                                                                     | 432       | 6         |

|                                                                                           |     |   |
|-------------------------------------------------------------------------------------------|-----|---|
| Vokale verschlucken                                                                       | 112 | 5 |
| sprechen schneller/ sprechen die Wörter schneller zusammen                                | 131 | 5 |
| reden hoch (Sprechlage)                                                                   | 132 | 5 |
| Endungen weg/ keine Endungen/ Endungen von Verben weg/ lassen am Ende Buchstaben weg (ni) | 220 | 5 |
| ha(o) (ja)                                                                                | 312 | 5 |
| Muttschekiepchen (Marienkäfer)                                                            | 312 | 5 |
| Nuschel (Kopf)                                                                            | 312 | 5 |
| mide (müde)                                                                               | 321 | 5 |
| ämal (einmal)                                                                             | 321 | 5 |
| Thüringisch/ leicht Thüringisch                                                           | 432 | 5 |
| Chemnitzer Sächsisch/ ähnlich wie Chemnitzer Sächsisch                                    | 432 | 5 |
| Erzgebirgisches Sächsisch/ Sächsisches Erzgebirgisch                                      | 432 | 5 |
| Betonung/ Betonung anders                                                                 | 133 | 4 |
| Marjkt                                                                                    | 321 | 4 |
| Übergang Sächsisch-Erzgebirgisch-Vogtländisch                                             | 432 | 4 |
| Richtung Berlinerisch                                                                     | 432 | 4 |
| Fränkischer Einfluss/ mehr ins Fränkische/ sehr dem Fränkischen verwandt                  | 432 | 4 |
| südliche Ecke der ehem. DDR                                                               | 442 | 4 |
| bisschen breite Vokale                                                                    | 112 | 3 |
| viele a-Töne                                                                              | 113 | 3 |
| a > ou                                                                                    | 114 | 3 |
| t > d                                                                                     | 123 | 3 |
| sch-Laute/ [sch] deutlicher                                                               | 123 | 3 |
| zusammenziehen von Silben/ verkürzte Worte                                                | 220 | 3 |
| nor (ja)                                                                                  | 312 | 3 |
| nu (ja)                                                                                   | 312 | 3 |
| gelapp [keine weiteren Angaben]                                                           | 312 | 3 |
| wat                                                                                       | 321 | 3 |
| ick                                                                                       | 321 | 3 |
| offen                                                                                     | 412 | 3 |
| die Manneln                                                                               | 415 | 3 |
| frecher                                                                                   | 422 | 3 |
| dialektbetont                                                                             | 431 | 3 |
| Mischung Sächsisch-Erzgebirgisch                                                          | 432 | 3 |
| Übergang vom Leipziger Sächsisch und Erzgebirgisch                                        | 432 | 3 |
| Großraum Chemnitz                                                                         | 441 | 3 |
| Nordsachsen                                                                               | 442 | 3 |
| Vokalfärbung                                                                              | 112 | 2 |
| Selbstlaute anders/ Vokale                                                                | 112 | 2 |
| zusammengzogen/ alles zusammen ausgesprochen                                              | 142 | 2 |
| -en > -e                                                                                  | 220 | 2 |
| ni (nicht)                                                                                | 321 | 2 |
| weich/ sehr weich                                                                         | 412 | 2 |
| nicht so schlimm wie Zwickau                                                              | 422 | 2 |
| bäuerlich/ dörflich                                                                       | 422 | 2 |
| fast Anhaltinisch                                                                         | 432 | 2 |
| Mittelsächsisch                                                                           | 432 | 2 |
| Thüringisches Sächsisch                                                                   | 432 | 2 |
| Vorerzgebirgisch                                                                          | 432 | 2 |
| Leipziger Sächsisch                                                                       | 432 | 2 |

|                                          |     |     |
|------------------------------------------|-----|-----|
| Westsachsen                              | 441 | 2   |
| Bad Gottleuba ist Grenze zum Sächsischen | 441 | 2   |
| Großraum Leipzig                         | 441 | 2   |
| Frankenland/ Frankenwald                 | 441 | 2   |
| a > oa                                   | 114 | 1   |
| Konsonanten weich                        | 122 | 1   |
| weiches [g]                              | 123 | 1   |
| j > sch                                  | 123 | 1   |
| R deutlicher                             | 123 | 1   |
| kurzes [a] betont                        | 133 | 1   |
| bequeme Sprechweise                      | 142 | 1   |
| nicht verkürzt                           | 142 | 1   |
| no (ja)                                  | 312 | 1   |
| gä (nicht wahr?)                         | 312 | 1   |
| O Arzgebirg wie bist du schi.            | 313 | 1   |
| Holzschnitzen                            | 313 | 1   |
| nät (nicht)                              | 321 | 1   |
| och (auch)                               | 321 | 1   |
| Bam (Baum)                               | 321 | 1   |
| habsch (habe ich)                        | 321 | 1   |
| Schacke (Jacke)                          | 321 | 1   |
| Schogurt (Jogurt)                        | 321 | 1   |
| dorde (dort)                             | 321 | 1   |
| kein richtiger Dialekt                   | 411 | 1   |
| sprechen sehr hell                       | 412 | 1   |
| emotionale Sprache                       | 412 | 1   |
| wie Katharina Witt                       | 414 | 1   |
| auf dörfen mehr Dialekt als in der Stadt | 431 | 1   |
| Meißnisches Sächsisch                    | 432 | 1   |
| Mittelsachsen                            | 441 | 1   |
| Lausitz                                  | 441 | 1   |
| Vorerzgebirge                            | 441 | 1   |
| Großraum Dresden                         | 441 | 1   |
| Westen                                   | 442 | 1   |
| A9                                       | 442 | 1   |
| Grenze zwischen Thüringen und Sachsen    | 442 | 1   |
|                                          |     |     |
| Gesamtpunktwert                          |     | 718 |

Tabelle 76: Die assoziierten Einzelmerkmale der osterländischen Gruppe im Cluster 2

| Beschreibung                                                                                                           | Subgruppe | Punktwert |
|------------------------------------------------------------------------------------------------------------------------|-----------|-----------|
| Sing-Sang/ bestimmte Melodie/ Tonfall/<br>Sprachmelodie/ anderer Klang/ Klangfarbe/<br>singender Tonfall/ sehr singend | 132       | 211       |
| Sächsisch/ typisches Sächsisch                                                                                         | 432       | 160       |
| man hört es/ erkennt man gleich/ erkennt man an der<br>Wortwahl                                                        | 414       | 146       |
| ni (nicht)                                                                                                             | 321       | 131       |
| bestimmte Laute/ andere Buchstaben                                                                                     | 111       | 129       |
| anders als Leipziger Dialekt                                                                                           | 411       | 107       |
| anders als Dresdener Dialekt                                                                                           | 411       | 96        |

|                                                                                                                                |     |    |
|--------------------------------------------------------------------------------------------------------------------------------|-----|----|
| mehrig gesprochen/ bequeme Sprechweise/<br>langgezogene Aussprache/ ausgedehnte Sprache/<br>ziehen Wörter lang und auseinander | 142 | 56 |
| nu (ja)                                                                                                                        | 312 | 55 |
| k > g                                                                                                                          | 123 | 53 |
| Endungen verschlucken/ Endungen weg/ keine<br>Endungen                                                                         | 220 | 49 |
| Konsonanten weich/ Konsonantenerweichung                                                                                       | 122 | 43 |
| Leipziger Sächsisch/ Gewandthausächsisch in<br>Leipzig                                                                         | 432 | 43 |
| sch-Laute                                                                                                                      | 123 | 32 |
| unklar/ verwischen von Sprache/ verschlucken viel/<br>nuscheln/ Nachlässigkeit beim Sprechen/ schwer<br>verständlich           | 142 | 31 |
| dörflich/ bäuerlich                                                                                                            | 422 | 30 |
| eigene Begriffe/ bestimmte Begriffe/ gewisse<br>Ausdrücke                                                                      | 311 | 29 |
| freundlich/ gemütlich/ klingt charmant/ hört sich gut<br>an/ sympathisch/ liebenswert                                          | 422 | 29 |
| t > d                                                                                                                          | 123 | 24 |
| och (auch)                                                                                                                     | 321 | 21 |
| verkürzte Worte/ zusammenziehen von Silben/<br>Silben verschlucken/ lassen am Ende Buchstaben weg<br>(ni)                      | 220 | 20 |
| Buchstaben verschlucken/ Buchstaben am Ende<br>weg/ Weglassen von ganzen Buchstaben                                            | 111 | 19 |
| Vokale nicht klar                                                                                                              | 112 | 19 |
| [o] kehlig                                                                                                                     | 142 | 19 |
| breit/ breit gesprochen                                                                                                        | 412 | 19 |
| zusammengezogen/ verkürzte Aussprache/ alles<br>zusammen gesprochen                                                            | 142 | 18 |
| Dresdner Sächsisch/ Dresdnerisch                                                                                               | 432 | 18 |
| Großraum Leipzig/ Leipziger Raum/ Randleipziger/<br>nördlich von Leipzig                                                       | 441 | 18 |
| klar/ ziemlich deutlich/ verständlicher als tiefes<br>Sächsisch/ deutlicher als in Leipzig                                     | 142 | 17 |
| Unterkiefer runter hängen lassen/ Unterkiefer vor<br>und rauslaufen lassen                                                     | 142 | 17 |
| trottelig/ reudiger/ klingt arrogant/ sprechen ganz<br>böse/ klingt nicht besondersgut/ ganz schlimm                           | 422 | 17 |
| ch > sch                                                                                                                       | 123 | 16 |
| Mutzschekiepchen (Marienkäfer)                                                                                                 | 312 | 16 |
| a > ou                                                                                                                         | 114 | 15 |
| sehr weich/ sprechen weich/ ganz weicher Mus                                                                                   | 412 | 14 |
| a > oa                                                                                                                         | 114 | 13 |
| g > j / aufgeweichtes g > j / [j] statt [g]                                                                                    | 123 | 13 |
| emotionale Sprache                                                                                                             | 412 | 13 |
| leichtes Sächsisch/ Sächsisch aber etwas schwächer/<br>Sächsisch und was anderes/ sächsische Nuancen                           | 432 | 13 |
| Großraum Dresden/ mehr Richtung Dresden                                                                                        | 441 | 13 |
| a > o                                                                                                                          | 114 | 11 |
| langsam                                                                                                                        | 412 | 11 |
| auf Dörfern mehr Dialekt als in der Stadt/ Stadt-<br>Land-Verhältnis                                                           | 431 | 11 |
| Vokale verschlucken                                                                                                            | 112 | 10 |
| Nuschel (Kopf)                                                                                                                 | 312 | 10 |
| habsch (habe ich)                                                                                                              | 321 | 10 |

|                                                                              |     |    |
|------------------------------------------------------------------------------|-----|----|
| Anhaltinisch/ fast Anhaltinisch/ Sachsenanhaltinisch                         | 432 | 10 |
| können kein [a] sprechen                                                     | 114 | 9  |
| können kein [o] sprechen                                                     | 114 | 9  |
| nicht hart                                                                   | 412 | 9  |
| [a] und [o] werden vermischt                                                 | 114 | 8  |
| tun' im Sprachgebrauch                                                       | 240 | 8  |
| nej (nein)                                                                   | 321 | 8  |
| dä (die)                                                                     | 321 | 8  |
| dr (der)                                                                     | 321 | 8  |
| mr (mir)                                                                     | 321 | 8  |
| jekommen/ jejangen/ jib/ jelb/ jummi                                         | 321 | 8  |
| Aussprache der Vokale                                                        | 112 | 7  |
| Weichmachen von harten Buchstaben                                            | 121 | 7  |
| Umgang mit Konsonanten                                                       | 122 | 7  |
| Worte sprudeln heraus                                                        | 141 | 7  |
| keijne                                                                       | 321 | 7  |
| ouch                                                                         | 321 | 7  |
| allgemeine sächsische Eigenarten/ nicht auffällig/<br>nichts Besonderes      | 411 | 7  |
| schlechtes Sächsisch                                                         | 422 | 7  |
| Meißnisches Sächsisch                                                        | 432 | 7  |
| Erzgebirgisch                                                                | 432 | 7  |
| am Satzende hoch/ reden hoch (Sprechlage)/ am<br>Ende des Satzes Stimme hoch | 132 | 6  |
| -en > -e                                                                     | 220 | 6  |
| Bemme (Scheibe Brot)                                                         | 312 | 6  |
| Brätschen (Brötchen)                                                         | 312 | 6  |
| Gaffee                                                                       | 321 | 6  |
| Wurscht                                                                      | 321 | 6  |
| derbes Sächsisch                                                             | 412 | 6  |
| heimatlich                                                                   | 414 | 6  |
| nicht so lang wie Chemnitz                                                   | 142 | 5  |
| Hinnor (Hühner)                                                              | 321 | 5  |
| gön (können)                                                                 | 321 | 5  |
| isch                                                                         | 321 | 5  |
| mir (wir)                                                                    | 321 | 5  |
| dorde (dort)                                                                 | 321 | 5  |
| nachm (nach dem)                                                             | 321 | 5  |
| anders als Chemnitzer Dialekt                                                | 411 | 5  |
| fast ohne Dialekt/ nicht so stark ausgeprägt                                 | 431 | 5  |
| Mischung aus Sächsisch und Anhaltinisch                                      | 432 | 5  |
| Übergangsgebiet/ Mischung                                                    | 442 | 5  |
| langsames Sprechen                                                           | 131 | 4  |
| andere Ausdrucksweise                                                        | 141 | 4  |
| nor (ja)                                                                     | 312 | 4  |
| Decher (abfällig für kleine Kinder)                                          | 312 | 4  |
| nuglar (na klar)                                                             | 321 | 4  |
| heeme (zu Hause)                                                             | 321 | 4  |
| komisches Sächsisch                                                          | 411 | 4  |
| Kultursprache wegen Hochdeutsch                                              | 411 | 4  |
| Kulturerbe                                                                   | 411 | 4  |
| muss sich keiner schämen wegen seiner Sprache                                | 421 | 4  |
| Nordwestsächsisch                                                            | 432 | 4  |



|                                                                             |     |   |
|-----------------------------------------------------------------------------|-----|---|
| Richtung Berlinerisch                                                       | 432 | 4 |
| Mischung aus Muldenthal, Dresden, Leipzig und Hochdeutsch                   | 442 | 4 |
| Mischung zwischen Leipzig und Dresden                                       | 442 | 4 |
| ai-Laute                                                                    | 113 | 3 |
| ai > ä                                                                      | 114 | 3 |
| [p, t, k] weich                                                             | 123 | 3 |
| laierig                                                                     | 132 | 3 |
| nä (nicht wahr?)                                                            | 312 | 3 |
| Dräsdän                                                                     | 321 | 3 |
| durch die vielen Zugezogenen kein richtiges Sächsisch mehr/ wenig Sächsisch | 411 | 3 |
| zart                                                                        | 412 | 3 |
| schwer erkennbar                                                            | 414 | 3 |
| so wie der Radiosprecher im Radio PSR                                       | 414 | 3 |
| mehr selbstbewusst sein                                                     | 415 | 3 |
| zelebrieren ihren Dialekt                                                   | 415 | 3 |
| mehr Hochdeutsch/ fast Hochdeutsch                                          | 431 | 3 |
| ähnlich wie in Grimma                                                       | 432 | 3 |
| Südsachsen                                                                  | 441 | 3 |
| Meißner-Dresdner Raum                                                       | 441 | 3 |
| Staffellandschaft                                                           | 442 | 3 |
| nördlich von Sachsen/ Richtung Norden                                       | 442 | 3 |
| Grenze zu Sachsen/ Randgebiete von Sachsen                                  | 442 | 3 |
| Lautfärbung                                                                 | 111 | 2 |
| Vokalfarbe ändert sich                                                      | 112 | 2 |
| Vokale                                                                      | 112 | 2 |
| rollendes R                                                                 | 123 | 2 |
| sprechen schneller                                                          | 131 | 2 |
| unbetonte Konsonanten [d, t, g, k]                                          | 133 | 2 |
| Betonung anders/ andere Betonung als in Leipzig                             | 133 | 2 |
| 3./4. Fall vertauschen                                                      | 230 | 2 |
| gib mich mal                                                                | 230 | 2 |
| hä in den Sätzen                                                            | 312 | 2 |
| nee (nein)                                                                  | 321 | 2 |
| kofm                                                                        | 321 | 2 |
| lofm                                                                        | 321 | 2 |
| Bämburch (Bernburg)                                                         | 321 | 2 |
| ämal (einmal)                                                               | 321 | 2 |
| wat                                                                         | 321 | 2 |
| ick                                                                         | 321 | 2 |
| Torjau (Torgau)                                                             | 321 | 2 |
| nicht so breit wie im Süden                                                 | 412 | 2 |
| vertrautes Sächsisch                                                        | 412 | 2 |
| deutlich spürbar                                                            | 414 | 2 |
| wie ich                                                                     | 414 | 2 |
| stigmatisierter Dialekt                                                     | 422 | 2 |
| frecher                                                                     | 422 | 2 |
| Mischung aus Berlinern und Sächsisch                                        | 432 | 2 |
| Sächsisch und Oberlausitzer Deutsch                                         | 432 | 2 |
| Vogtländisch-Erzgebirgisch                                                  | 432 | 2 |
| vermischt Westerzebergisch                                                  | 432 | 2 |
| Sachsen-Anhalt und Brandenburg                                              | 441 | 2 |

|                                                                  |     |      |
|------------------------------------------------------------------|-----|------|
| mittelsächsischer Raum                                           | 441 | 2    |
| Vorerzgebirge                                                    | 441 | 2    |
| Eilenburger Gegend                                               | 441 | 2    |
| Großraum Halle                                                   | 441 | 2    |
| keine Buchstaben vertauscht                                      | 111 | 1    |
| Vokale offen                                                     | 112 | 1    |
| breite Vokale                                                    | 112 | 1    |
| andere Vokale                                                    | 112 | 1    |
| rollt etwas                                                      | 121 | 1    |
| j-Laute                                                          | 123 | 1    |
| Sprachmelodie geht nicht hoch                                    | 132 | 1    |
| starke Verzerrung der Wörter                                     | 220 | 1    |
| Endungen anders                                                  | 220 | 1    |
| ha(o) (ja)                                                       | 312 | 1    |
| naja                                                             | 312 | 1    |
| Wo de Hos'n Hus'n has'n und de Hus'n Hos'n sei do sei mir drham. | 313 | 1    |
| Avdentslieder                                                    | 313 | 1    |
| Erzgebirgisch                                                    | 321 | 1    |
| mide (müde)                                                      | 321 | 1    |
| ma(o) (Mann)                                                     | 321 | 1    |
| icke                                                             | 321 | 1    |
| Machdeburch (Magdeburg)                                          | 321 | 1    |
| jut                                                              | 321 | 1    |
| Marjkt                                                           | 321 | 1    |
| hartes Sächsisch                                                 | 412 | 1    |
| sprechen sehr hell                                               | 412 | 1    |
| Erzgebirgler                                                     | 415 | 1    |
| brandenburgischer Dialekt                                        | 432 | 1    |
| Chemnitzer Sächsisch                                             | 432 | 1    |
| Erzgebirgisches Sächsisch                                        | 432 | 1    |
| Hallenser Dialekt                                                | 432 | 1    |
| osterzgebirgisch                                                 | 432 | 1    |
| zwischen Sächsisch und Brandenburgisch                           | 432 | 1    |
| Übergang vom Sächsischen zum Erzgebirgisch-Vogtländischen        | 432 | 1    |
| Übergang zwischen Leipziger Sächsisch und Erzgebirgisch          | 432 | 1    |
| Thüringisch                                                      | 432 | 1    |
| Vuuchtländisch                                                   | 432 | 1    |
| Sachsen-Anhalt                                                   | 441 | 1    |
| Großraum Berlin                                                  | 441 | 1    |
| näher am Gebirge                                                 | 442 | 1    |
|                                                                  |     |      |
| Gesamtpunktwert                                                  |     | 2346 |

Tabelle 77: Die assoziierten Einzelmerkmale der osterländischen Gruppe im Cluster 3

| Beschreibung                                                                                                                        | Subgruppe | Punktwert |
|-------------------------------------------------------------------------------------------------------------------------------------|-----------|-----------|
| rollendes R / schnorren mit R/ R von hinten                                                                                         | 123       | 36        |
| man hört es                                                                                                                         | 414       | 20        |
| Lausitz/ Lausitzer Gegend                                                                                                           | 441       | 18        |
| Sing-Sang/ Tonlage/ Tonfall/ Tonfall ist anders als Sächsisch/ Tonfall geht in Richtung Berlinerisch                                | 132       | 17        |
| nu (ja)                                                                                                                             | 312       | 13        |
| leicht Berlinerisch/ Richtung Berlinerisch                                                                                          | 432       | 12        |
| Sächsisch/ typisch Sächsisch                                                                                                        | 432       | 11        |
| härter/ harte Aussprache/ härtere Aussprache als in Leipzig                                                                         | 412       | 10        |
| Extrasprache gehört aber zum Sächsischen/ bestimmte Art vom Sächsischen/ sächsischer Spezialdialekt                                 | 432       | 10        |
| anders als in Leipzig/ anders als in Dresden/ anders als in Chemnitz                                                                | 411       | 9         |
| geht mehr ins Hochdeutsche/ Worte nicht so dialekthaft/ fast Hochdeutsch/ sehr Hochdeutsch in den Worten/ nah an der Schriftsprache | 431       | 9         |
| Buchstaben verschlucken/ weglassen von ganzen Buchstaben                                                                            | 111       | 7         |
| Betonung/ Betonung anders                                                                                                           | 133       | 7         |
| freundlich/ sympathisch                                                                                                             | 422       | 7         |
| Erzgebirgisch                                                                                                                       | 432       | 7         |
| Lausitzisch/ Lausitzer Dialekt                                                                                                      | 432       | 7         |
| Ostsachsen/ östliches Sachsen                                                                                                       | 441       | 7         |
| alles langgezogen/ langgezogene Aussprache/ nicht so lang wie Chemnitz/ ziehen Wörter lang und auseinander                          | 142       | 6         |
| bestimmte Begriffe/ Redewendungen anders                                                                                            | 311       | 6         |
| verständlicher als tiefes Sächsisch/ deutlicher als in Leipzig/ klarer                                                              | 142       | 5         |
| och (auch)                                                                                                                          | 321       | 5         |
| weich/ ganz weicher Mus                                                                                                             | 412       | 5         |
| reudiger/ sprechen ganz böse/ ganz schlimm/ trottelig                                                                               | 422       | 5         |
| Sächsisch und Oberlausitzer Deutsch                                                                                                 | 432       | 5         |
| Oberlausitz                                                                                                                         | 441       | 5         |
| schnelle Aussprache/ sprechen schneller                                                                                             | 131       | 4         |
| manchmal schwer verständlich/ unklar                                                                                                | 142       | 4         |
| alles zusammen gesprochen/ zusammengezogen                                                                                          | 142       | 4         |
| keine Endungen/ lassen am Ende Buchstaben weg (ni)                                                                                  | 220       | 4         |
| no (ja)                                                                                                                             | 312       | 4         |
| guddi (gut)                                                                                                                         | 321       | 4         |
| bäuerlich/ dörflich                                                                                                                 | 422       | 4         |
| fast Anhaltinisch                                                                                                                   | 432       | 4         |
| Richtung Spreewald                                                                                                                  | 441       | 4         |
| andere Buchstaben                                                                                                                   | 111       | 3         |
| rollen von anderen Buchstaben                                                                                                       | 121       | 3         |
| Konsonanten weich                                                                                                                   | 122       | 3         |
| k > g                                                                                                                               | 123       | 3         |
| Muttschekiepchen (Marienkäfer)                                                                                                      | 312       | 3         |
| Nuschel (Kopf)                                                                                                                      | 312       | 3         |

|                                                        |     |     |
|--------------------------------------------------------|-----|-----|
| ni (nicht)                                             | 321 | 3   |
| ick                                                    | 321 | 3   |
| anders als wir                                         | 414 | 3   |
| Schlesier nennen sie sich                              | 415 | 3   |
| brandenburgischer Dialekt                              | 432 | 3   |
| Mittelding zwischen Dresdner Sächsisch und was eigenes | 432 | 3   |
| Richtung Berlin                                        | 441 | 3   |
| Großraum Cottbus                                       | 441 | 3   |
| Richtung Norden/ nördlich von Sachsen                  | 442 | 3   |
| Vokale verschlucken                                    | 112 | 2   |
| Vokale klarer                                          | 112 | 2   |
| a > oa                                                 | 114 | 2   |
| weiches [g]                                            | 123 | 2   |
| sch-Laute                                              | 123 | 2   |
| kurzes [a] betont                                      | 133 | 2   |
| reden drauf los                                        | 141 | 2   |
| kehlige Aussprache                                     | 142 | 2   |
| bequeme Sprechweise                                    | 142 | 2   |
| wa (nicht wahr?)                                       | 312 | 2   |
| ämal (einmal)                                          | 321 | 2   |
| wat                                                    | 321 | 2   |
| klingt wie Englisch                                    | 411 | 2   |
| ganz komischer Dialekt                                 | 411 | 2   |
| emotionale Sprache                                     | 412 | 2   |
| Ostdeutsch                                             | 413 | 2   |
| Schandschnauzen                                        | 415 | 2   |
| frecher                                                | 422 | 2   |
| verstärktes Dresdnerisch/ Dresdner Sächsisch           | 431 | 2   |
| Vogtländisch-Erzgebirgisch                             | 432 | 2   |
| Richtung Preußen                                       | 441 | 2   |
| Niederlausitz                                          | 441 | 2   |
| bisschen breite Vokale                                 | 112 | 1   |
| o > u                                                  | 114 | 1   |
| ziehen Sätze länger                                    | 240 | 1   |
| Go Trabi Go                                            | 313 | 1   |
| nuglar (na klar)                                       | 321 | 1   |
| habsch (habe ich)                                      | 321 | 1   |
| nicht hart                                             | 412 | 1   |
| langsam                                                | 412 | 1   |
| Brandenburgisch                                        | 432 | 1   |
| Leipziger Sächsisch                                    | 432 | 1   |
| Sächsisch mit berlinischem Einschlag                   | 432 | 1   |
| Großraum Dresden                                       | 441 | 1   |
|                                                        |     |     |
| Gesamtpunktwert                                        |     | 386 |

Tabelle 78: Die assoziierten Einzelmerkmale der osterländischen Gruppe im Cluster 4

| Beschreibung                                                                  | Subgruppe | Punktwert |
|-------------------------------------------------------------------------------|-----------|-----------|
| Westdialekt/ westdeutscher Dialekt                                            | 413       | 20        |
| Bayerisch/ bayerischer Touch                                                  | 432       | 9         |
| Fränkisch                                                                     | 432       | 6         |
| schnorren mit R / rollendes R / stark rollendes R / gerolltes R mit der Zunge | 123       | 5         |
| Frankenland/ Franken                                                          | 441       | 4         |
| deutlich/ klarer                                                              | 142       | 2         |
| angenehm                                                                      | 422       | 2         |
| Thüringisch                                                                   | 432       | 2         |
| Westen                                                                        | 442       | 2         |
| viel [o] [u]                                                                  | 113       | 1         |
| a > o                                                                         | 114       | 1         |
| R deutlicher                                                                  | 123       | 1         |
| Satzmelodie                                                                   | 132       | 1         |
| alles im Hals gesprochen                                                      | 142       | 1         |
| bequeme Sprechweise                                                           | 142       | 1         |
| unverständlich                                                                | 142       | 1         |
| verschlucken alles                                                            | 142       | 1         |
| lassen in Worten Buchstaben weg                                               | 220       | 1         |
| keine vollständigen Sätze                                                     | 240       | 1         |
| bestimmte Begriffe                                                            | 311       | 1         |
| Servus (Tschüss)                                                              | 312       | 1         |
| Grüß Gott                                                                     | 312       | 1         |
| ja mai (ja schau)                                                             | 312       | 1         |
| gerollt                                                                       | 411       | 1         |
| alte bäuerliche Sprechart                                                     | 411       | 1         |
| klingt hart                                                                   | 412       | 1         |
| deftig                                                                        | 412       | 1         |
| erkennt man                                                                   | 414       | 1         |
| dort wohnen viele Sachsen                                                     | 415       | 1         |
| schrecklich                                                                   | 422       | 1         |
| Niederbayerisch                                                               | 432       | 1         |
| Fränkisch-Bayerisch                                                           | 432       | 1         |
| Hochdeutsch und Bayerisch                                                     | 432       | 1         |
| Bayern                                                                        | 441       | 1         |
| Richtung Erzgebirge und Vogtland                                              | 441       | 1         |
| Vogtland                                                                      | 441       | 1         |
| Frankenwald                                                                   | 441       | 1         |
| Mittelding zwischen Bayern und Sachsen                                        | 442       | 1         |
|                                                                               |           |           |
| Gesamtpunktwert                                                               |           | 81        |

Tabelle 79: Die assoziierten Einzelmerkmale der osterländischen Gruppe im Cluster 5

| Beschreibung                                                                                               | Subgruppe | Punktwert |
|------------------------------------------------------------------------------------------------------------|-----------|-----------|
| man hört es/ erkennt man schnell                                                                           | 414       | 118       |
| Sachsen-Anhalt                                                                                             | 441       | 104       |
| heller als Sächsisch                                                                                       | 412       | 95        |
| g > j / aufgeweichtes g > j                                                                                | 123       | 39        |
| Anhaltinisch/ Sachsenanhaltinisch                                                                          | 432       | 38        |
| Tonfall/ Sing-Sang/ andere Stimmlage/ andere Melodie/ kein schöner Klang/ Tonfall ist anders als Sächsisch | 132       | 35        |
| jehen (gehen)/ jejangen/ jekommen/ ejal/ jelb/ jib/ jummi                                                  | 321       | 31        |
| klar/ sprechen deutlich/ verständlicher als tiefes Sächsisch/ kein nuscheln                                | 142       | 15        |
| bisschen Berlinerisch/ Richtung Berlinerisch/ eher Berlin-einschlägig                                      | 432       | 13        |
| Sächsisch                                                                                                  | 432       | 11        |
| Hallischer Dialekt/ Hallensisch/ Hallisch                                                                  | 432       | 9         |
| Umgang mit Konsonanten                                                                                     | 122       | 8         |
| [j] / nicht so ausgeprägtes [j] wie in Dessau                                                              | 123       | 8         |
| unbetonte Konsonanten [d, t, g, k]                                                                         | 133       | 8         |
| na (ja)                                                                                                    | 312       | 8         |
| ick                                                                                                        | 321       | 8         |
| reudiger/ trottelig/ klingt nicht besonders gut                                                            | 422       | 7         |
| Mischung aus Sächsisch und Anhaltinisch                                                                    | 432       | 7         |
| nördlich von Sachsen/ nördlich von Leipzig/ Richtung Norden                                                | 442       | 7         |
| Konsonanten weich                                                                                          | 122       | 6         |
| langgezogene Aussprache                                                                                    | 142       | 6         |
| so wie der Radiosprecher im Radio PSR                                                                      | 414       | 6         |
| Mischung aus Berlinern und Sächsisch                                                                       | 432       | 6         |
| Großraum Halle                                                                                             | 441       | 6         |
| Vokale breit gezogen                                                                                       | 112       | 5         |
| Machdeburgh (Magdeburg)                                                                                    | 321       | 5         |
| jut                                                                                                        | 321       | 5         |
| fast Hochdeutsch/ fast ohne Dialekt/ Worte nicht so dialekthaft                                            | 431       | 5         |
| Richtung Berlin/ Berliner Ecke                                                                             | 441       | 5         |
| sprechen schneller/ schnelle Aussprache                                                                    | 131       | 4         |
| am Satzende hoch/ am Ende des Satzes Stimme hoch                                                           | 132       | 4         |
| verkürzt/ zusammengezogen/ verschlucken viel                                                               | 142       | 4         |
| nu (ja)                                                                                                    | 312       | 4         |
| Bärnburch (Bernburg)                                                                                       | 321       | 4         |
| Torjau (Torgau)                                                                                            | 321       | 4         |
| fast normal/ nicht auffällig                                                                               | 411       | 4         |
| ländlich/ bäuerlich/ dörflich                                                                              | 422       | 4         |
| unsaubere Aussprache/ unklar/ nuscheln                                                                     | 142       | 3         |
| bestimmte Begriffe/ nicht so viele sächsische Begriffe                                                     | 311       | 3         |
| jutwor (gut nicht wahr?)                                                                                   | 321       | 3         |
| wat                                                                                                        | 321       | 3         |
| langsam                                                                                                    | 412       | 3         |
| frecher                                                                                                    | 422       | 3         |
| verwechselt man manchmal mit Berlinisch                                                                    | 432       | 3         |
| Buchstaben verschlucken                                                                                    | 111       | 2         |

|                                                 |     |     |
|-------------------------------------------------|-----|-----|
| andere Buchstaben                               | 111 | 2   |
| Vokale verschlucken                             | 112 | 2   |
| k > g                                           | 123 | 2   |
| sch-Laute                                       | 123 | 2   |
| 3./4. Fall vertauschen                          | 230 | 2   |
| gib mich mal                                    | 230 | 2   |
| Mutzschekiepchen (Marienkäfer)                  | 312 | 2   |
| Nuschel (Kopf)                                  | 312 | 2   |
| wenig Sächsisch                                 | 411 | 2   |
| anders als Leipzigerisch                        | 411 | 2   |
| breite Aussprache der Vokale                    | 412 | 2   |
| derb                                            | 412 | 2   |
| ähnlich wie Leipziger Dialekt                   | 432 | 2   |
| Vokale klarer                                   | 112 | 1   |
| a > o                                           | 114 | 1   |
| a > oa                                          | 114 | 1   |
| andere Betonung als in Leipzig                  | 133 | 1   |
| bequeme Sprechweise                             | 142 | 1   |
| keine Endungen                                  | 220 | 1   |
| naja                                            | 312 | 1   |
| habsch (habe ich)                               | 321 | 1   |
| icke                                            | 321 | 1   |
| kein richtiger Dialekt                          | 411 | 1   |
| sehr weich                                      | 412 | 1   |
| emotionale Sprache                              | 412 | 1   |
| sympathisch                                     | 422 | 1   |
| Richtung Erzgebirgisch                          | 432 | 1   |
| ähnlich wie Hallisch und Magdeburger Aussprache | 432 | 1   |
| Anhaltinisch-Hallenser-Sächsisch                | 432 | 1   |
| tendiert zum Hallischen und Ostthüringischen    | 432 | 1   |
| aus ehemaligem Osten                            | 441 | 1   |
| Sachsen/Anhalt-Brandenburg                      | 441 | 1   |
| Großraum Dresden                                | 441 | 1   |
| näher an Gebirge                                | 442 | 1   |
| Randgebiete von Sachsen und Hochdeutsch         | 442 | 1   |
| Grenze zu Sachsen                               | 442 | 1   |
| Mischgegend                                     | 442 | 1   |
|                                                 |     |     |
| Gesamtpunktwert                                 |     | 729 |

Tabelle 80: Die assoziierten Einzelmerkmale der osterländischen Gruppe im Cluster 6

| Beschreibung                                                                  | Subgruppe | Punktwert |
|-------------------------------------------------------------------------------|-----------|-----------|
| westdeutscher Dialekt/ Westdialekt                                            | 413       | 20        |
| Bayerisch                                                                     | 432       | 8         |
| Fränkisch                                                                     | 432       | 6         |
| schnorren mit R / rollendes R / stark rollendes R / gerolltes R mit der Zunge | 123       | 5         |
| Frankenland/ Franken                                                          | 441       | 4         |
| angenehm/ höre ich gern                                                       | 422       | 3         |
| Thüringisch                                                                   | 432       | 2         |
| Vogtland                                                                      | 441       | 2         |
| Westen                                                                        | 442       | 2         |
| viel [o] [u]                                                                  | 113       | 1         |
| a > o                                                                         | 114       | 1         |
| R deutlicher                                                                  | 123       | 1         |
| deutlich                                                                      | 142       | 1         |
| alles im Hals gesprochen                                                      | 142       | 1         |
| bequeme Sprechweise                                                           | 142       | 1         |
| klarer                                                                        | 142       | 1         |
| unverständlich                                                                | 142       | 1         |
| verschlucken alles                                                            | 142       | 1         |
| lassen in Worten Buchstaben weg                                               | 220       | 1         |
| keine vollständigen Sätze                                                     | 240       | 1         |
| andere Ausdrücke                                                              | 311       | 1         |
| Servus (Tschüss)                                                              | 312       | 1         |
| Grüß Gott                                                                     | 312       | 1         |
| ja mai (ja schau)                                                             | 312       | 1         |
| gerollt                                                                       | 411       | 1         |
| alte bäuerliche Sprechart                                                     | 411       | 1         |
| klingt hart                                                                   | 412       | 1         |
| dort wohnen viele Sachsen                                                     | 415       | 1         |
| schrecklich                                                                   | 422       | 1         |
| Nordbayerisch                                                                 | 432       | 1         |
| Niederbayerisch                                                               | 432       | 1         |
| Fränkisch-Bayerisch                                                           | 432       | 1         |
| Hochdeutsch und Bayerisch                                                     | 432       | 1         |
| Vogtländisch                                                                  | 432       | 1         |
| Richtung Erzgebirge-Vogtland                                                  | 441       | 1         |
| Frankenwald                                                                   | 441       | 1         |
| Mittelding zwischen Bayern und Sachsen                                        | 442       | 1         |
| Gesamtpunktwert                                                               |           | 80        |

Tabelle 81: Die assoziierten Einzelmerkmale der osterländischen Gruppe im Cluster 7



| Beschreibung                                                                               | Subgruppe | Punktwert |
|--------------------------------------------------------------------------------------------|-----------|-----------|
| Erzgebirgisch/ erzgebirgischer Dialekt/ erzgebirgische Mundart                             | 432       | 86        |
| eigene Begriffe/ andere Begriffe/ eigene Worte/ andere Wörter als im Mittelerzgebirgischen | 311       | 32        |
| singend/ sehr gesungen/ singen ab Klingenthal                                              | 132       | 12        |
| manchmal unverständlich/ schwer verständlich/ nicht verständlich/ vernuschelt              | 142       | 12        |
| Abkürzungen/ Verkürzungen (ran statt heran)                                                | 220       | 12        |
| Endungen verschlucken/ Endungen weg/ keine Endungen                                        | 220       | 11        |
| verkürzte Aussprache/ Zusammenziehung (hast, biste)                                        | 142       | 9         |
| man hört es/ erkennt man                                                                   | 414       | 9         |
| a (auch)                                                                                   | 321       | 8         |
| ähnlich Vogtländisch/ ähnlich Vogtländisch aber eigenständig                               | 432       | 8         |
| Wo de Hos'n Hus'n has'n und de Hus'n Hos'n sei do sei mir drham.                           | 313       | 7         |
| Hamit (Heimat)/ Hamitland (Heimatland)                                                     | 321       | 7         |
| nät (nicht)                                                                                | 321       | 6         |
| sich verbunden fühlen/ fast eigene Sprechweise                                             | 414       | 6         |
| viel [a(o)]                                                                                | 114       | 5         |
| e > a                                                                                      | 114       | 5         |
| ch > sch                                                                                   | 123       | 5         |
| andere Aussprache                                                                          | 142       | 5         |
| itze (es ist)                                                                              | 312       | 5         |
| Ärzgebärgsch/ Erzgebirgisch                                                                | 321       | 5         |
| git (geht)                                                                                 | 321       | 5         |
| giehste                                                                                    | 321       | 5         |
| ma(o)l                                                                                     | 321       | 5         |
| Bam (Baum)                                                                                 | 321       | 5         |
| Bamer (Bäume)                                                                              | 321       | 5         |
| gimmorma (gehen wir mal)                                                                   | 321       | 5         |
| maad (Mädchen)                                                                             | 321       | 5         |
| Hus (Hose)                                                                                 | 321       | 5         |
| erzgebirgisches Sächsisch                                                                  | 432       | 5         |
| Osterzgebirgisch                                                                           | 432       | 5         |
| Einfluss von Sächsisch und Vogtländisch                                                    | 432       | 5         |
| helle Laute werden dunkel und umgekehrt                                                    | 111       | 4         |
| Vokale anders                                                                              | 112       | 4         |
| g > ch                                                                                     | 123       | 4         |
| k > sch                                                                                    | 123       | 4         |
| Behndrelade (Fahrrad)                                                                      | 312       | 4         |
| och (auch)                                                                                 | 321       | 4         |
| in sich verschieden                                                                        | 411       | 4         |
| anders                                                                                     | 414       | 4         |
| Dresdner Sächsisch/ Dresdner Dialekt/ Dresdnerisch                                         | 432       | 4         |
| verwandt mit Sächsisch                                                                     | 432       | 4         |
| tiefes vogtländisch-erzgebirgisches Mischgebiet                                            | 432       | 4         |

|                                               |     |     |
|-----------------------------------------------|-----|-----|
| langes [a]                                    | 114 | 3   |
| bekannte Lieder                               | 313 | 3   |
| Weihnachten                                   | 313 | 3   |
| eigen/ eigene Mundart                         | 411 | 3   |
| Vogtländisch                                  | 432 | 3   |
| nor (ja)                                      | 312 | 2   |
| nu (ja)                                       | 312 | 2   |
| fäinet (nein)                                 | 312 | 2   |
| Glück auf                                     | 312 | 2   |
| stärkerer Dialekt                             | 431 | 2   |
| zwischen Sächsisch und Bayerisch              | 432 | 2   |
| Erzgebirge                                    | 441 | 2   |
| Westerzgebirge                                | 441 | 2   |
| Vokale langgezogen                            | 112 | 1   |
| rollendes R                                   | 123 | 1   |
| kehlig                                        | 142 | 1   |
| alles langgezogen                             | 142 | 1   |
| <e> angehängt auch bei Vokalen                | 220 | 1   |
| ni (nicht)                                    | 321 | 1   |
| Mitweid-e                                     | 321 | 1   |
| icken                                         | 321 | 1   |
| Mischung Erzgebirgisch und Dresdner Sächsisch | 432 | 1   |
| ähnlich wie Sprechweise in Schneeberg         | 432 | 1   |
| Preußen                                       | 441 | 1   |
| Übergangsgebiet                               | 442 | 1   |
|                                               |     |     |
| Gesamtpunktwert                               |     | 397 |

Tabelle 82: Die assoziierten Einzelmerkmale der vogt.-erzgeb. Gruppe im Cluster 1

| Beschreibung                                                                       | Subgruppe | Punktwert |
|------------------------------------------------------------------------------------|-----------|-----------|
| man hört es                                                                        | 414       | 45        |
| k > g / [g] für [k]                                                                | 123       | 23        |
| Intonation/ Klangfarbe/ andere Klangfarbe/ melodisch/<br>Singen/ Gesang/ singend   | 132       | 22        |
| Leipziger Sächsisch/ Leipzigerisch/ ähnlich wie Leipzig                            | 432       | 20        |
| breit/ breit gesprochen/ breite Aussprache                                         | 412       | 13        |
| Dresdner Sächsisch/ ähnlich wie Dresdner Sächsisch/<br>geht ins Dresdnerische über | 432       | 12        |
| Sächsisch/ angelehnt am Sächsischen/ sächselt etwas<br>/Ursprung vom Sächsischen   | 432       | 11        |
| nu (ja)                                                                            | 312       | 10        |
| sch-Laute                                                                          | 123       | 9         |
| Endungen verschlucken                                                              | 220       | 9         |
| alles weich ausgesprochen/ sprechen weich/ bisschen<br>weich                       | 412       | 9         |
| ähnlich wie ich/ eigene Sprechweise                                                | 414       | 9         |
| Anhaltinisch/ Sachsenanhaltinisch                                                  | 432       | 8         |
| weiches [g]                                                                        | 123       | 7         |
| klings ordinär/ proletarischer/ schlampig                                          | 422       | 7         |
| Thüringer Dialekt/ Thüringisch                                                     | 432       | 7         |
| Leipziger Gegend                                                                   | 441       | 7         |

|                                                          |     |   |
|----------------------------------------------------------|-----|---|
| ch > sch                                                 | 123 | 6 |
| Endungen komisch/ lassen was weg                         | 142 | 6 |
| Zusammenziehung (hast biste)                             | 220 | 6 |
| itze (es ist)                                            | 312 | 6 |
| git (geht)                                               | 321 | 6 |
| giste                                                    | 321 | 6 |
| ma(o)l                                                   | 321 | 6 |
| gimmorma (gehen wir mal)                                 | 321 | 6 |
| a > a(o)                                                 | 114 | 5 |
| ai > e                                                   | 114 | 5 |
| Zischlaute                                               | 121 | 5 |
| weiches [d]                                              | 123 | 5 |
| g > j                                                    | 123 | 5 |
| in Halle mehr Hochdeutsch                                | 431 | 5 |
| manchmal Hang zum Bayerischen/ Bayerisch und was anderes | 432 | 5 |
| Sachsen-Anhalt                                           | 441 | 5 |
| no (ja)                                                  | 312 | 4 |
| nor (ja)                                                 | 312 | 4 |
| Servus (Tschüss)                                         | 312 | 4 |
| joa (ja)                                                 | 321 | 4 |
| anders                                                   | 414 | 4 |
| Vokale langgezogen                                       | 112 | 3 |
| kein [a] / können kein [a] sprechen                      | 114 | 3 |
| kein [e] / sprechen kein [e]                             | 114 | 3 |
| [e] angehängt auch bei Vokalen                           | 220 | 3 |
| "nach" statt "zu" (ich gehe nach meiner Freundin)        | 230 | 3 |
| bestimmte Ausdrücke                                      | 311 | 3 |
| na (ja)                                                  | 312 | 3 |
| Deijlitzsch (Delitzsch)                                  | 321 | 3 |
| Döubeln (Döbeln)                                         | 321 | 3 |
| Mitweid-e                                                | 321 | 3 |
| jut                                                      | 321 | 3 |
| Mitweda (Mitweida)                                       | 321 | 3 |
| eigenartig                                               | 411 | 3 |
| fast Hochdeutsch/ hochdeutsch angehaucht                 | 431 | 3 |
| Chemnitzer Sächsisch                                     | 432 | 3 |
| Übergangsgebiet                                          | 442 | 3 |
| bequemes Sprechen                                        | 142 | 2 |
| nuscheln                                                 | 142 | 2 |
| gä (nicht wahr?)                                         | 312 | 2 |
| Go Trabi Go                                              | 313 | 2 |
| newar (nicht wahr?)                                      | 321 | 2 |
| ni (nicht)                                               | 321 | 2 |
| Läder                                                    | 321 | 2 |
| Lährer                                                   | 321 | 2 |
| dat                                                      | 321 | 2 |
| icken/ icke                                              | 321 | 2 |
| komisch                                                  | 411 | 2 |
| bisschen härter als Dresden                              | 412 | 2 |
| reiner                                                   | 412 | 2 |
| gemütliches Sächsisch                                    | 422 | 2 |
| hässliches Sächsisch                                     | 422 | 2 |

|                                        |     |     |
|----------------------------------------|-----|-----|
| Berlinerisch                           | 432 | 2   |
| nicht so wie in Leipzig                | 432 | 2   |
| Mischung aus Thüringisch und Sächsisch | 432 | 2   |
| Mischformen von allen Sächsischarten   | 442 | 2   |
| helle Vokale                           | 112 | 1   |
| a > o                                  | 114 | 1   |
| viele Zwischenlaute                    | 121 | 1   |
| rollendes R                            | 123 | 1   |
| weiche Endungen                        | 142 | 1   |
| alles langgezogen                      | 142 | 1   |
| nisch (nicht)                          | 321 | 1   |
| Machdeburch (Magdeburg)                | 321 | 1   |
| nicht so auffällig wie Vogtländisch    | 411 | 1   |
| vertraut                               | 412 | 1   |
| westdeutscher Dialekt                  | 413 | 1   |
| regional unterschiedlich               | 431 | 1   |
| nachlässiges Deutsch                   | 431 | 1   |
| Norddeutsch                            | 432 | 1   |
| Ostthüringisch                         | 432 | 1   |
| Brandenburger Einschlag                | 441 | 1   |
| Lausitzer Gegend                       | 441 | 1   |
| Spreewald                              | 441 | 1   |
| da oben                                | 442 | 1   |
| Dresden-Brandenburg-Mischung           | 442 | 1   |
| Mischung Chemnitz-Dresden              | 442 | 1   |
|                                        |     |     |
| Gesamtpunktwert                        |     | 443 |

Tabelle 83: Die assoziierten Einzelmerkmale der vogt.-erzgeb. Gruppe im Cluster 2

| Beschreibung                                                                                                         | Subgruppe | Punktwert |
|----------------------------------------------------------------------------------------------------------------------|-----------|-----------|
| Vogtländisch                                                                                                         | 432       | 94        |
| Klangfarbe/ Melodie/ andere Sprachmelodie/ Singen/ gesungen/ singende Sprache/ singen ganz anders als in Klingenthal | 132       | 47        |
| bestimmte Begriffe                                                                                                   | 311       | 24        |
| man hört es/ erkennt man                                                                                             | 414       | 18        |
| ai > a                                                                                                               | 114       | 14        |
| Erzgebirgisch                                                                                                        | 432       | 14        |
| Thüringisch                                                                                                          | 432       | 13        |
| Vogtland                                                                                                             | 441       | 13        |
| mehr ins Fränkische/ Fränkisch gefärbter Dialekt/ Mischung zum Fränkischen                                           | 432       | 11        |
| nät (nicht)                                                                                                          | 321       | 9         |
| eigen/ eigene Mundart                                                                                                | 411       | 9         |
| die gaatschen so/ gaatschen weniger                                                                                  | 411       | 8         |
| a > oa                                                                                                               | 114       | 7         |
| rollendes R                                                                                                          | 123       | 7         |
| pl > pf (Pflumpfe)                                                                                                   | 123       | 7         |
| goa (ja)                                                                                                             | 312       | 7         |
| na (nein)                                                                                                            | 321       | 7         |
| Baimer (Bäume)                                                                                                       | 321       | 7         |

|                                                                  |     |   |
|------------------------------------------------------------------|-----|---|
| ran (rein)                                                       | 321 | 7 |
| ich                                                              | 321 | 7 |
| zwischen Sächsisch und Bayerisch                                 | 432 | 7 |
| am Satzende hoch                                                 | 132 | 6 |
| nor (ja)                                                         | 312 | 6 |
| Servus (Tschüss)                                                 | 312 | 6 |
| joa (ja)                                                         | 321 | 6 |
| awäng (wenig)                                                    | 321 | 6 |
| anders als Sprechweise in Klingenthal                            | 411 | 6 |
| in sich verschieden                                              | 411 | 6 |
| anders                                                           | 414 | 6 |
| klingt besser                                                    | 422 | 6 |
| manchmal Hang zum Bayerischen                                    | 432 | 6 |
| Sächsisch und Fränkisch                                          | 432 | 6 |
| Vogtländer                                                       | 432 | 6 |
| Zwischending von Vogtländisch und Fränkisch                      | 432 | 6 |
| Erzgebirge                                                       | 441 | 6 |
| ai > e                                                           | 114 | 5 |
| kehlig/ kehlige Aussprache                                       | 142 | 5 |
| nisch (nicht)                                                    | 321 | 5 |
| Greez                                                            | 321 | 5 |
| Übergangsgebiet                                                  | 442 | 5 |
| a-Laute anders                                                   | 113 | 4 |
| Betonung anders                                                  | 133 | 4 |
| nibor (herüber)                                                  | 321 | 4 |
| nauf (hinauf)                                                    | 321 | 4 |
| nai (hinein)                                                     | 321 | 4 |
| bisschen härter als Sächsisch                                    | 412 | 4 |
| nicht ganz Vogtländisch                                          | 432 | 3 |
| bessere Aussprache                                               | 142 | 2 |
| nicht verständlich/ vernuschelt                                  | 142 | 2 |
| langgezogene Aussprache                                          | 142 | 2 |
| Behndrelade (Fahrrad)                                            | 312 | 2 |
| au                                                               | 321 | 2 |
| Kurorte und Bevölkerung von außerhalb                            | 411 | 2 |
| unangenehm                                                       | 422 | 2 |
| regional unterschiedlich                                         | 431 | 2 |
| fast Hochdeutsch                                                 | 431 | 2 |
| allgemein Sächsisch/ Ursächsisch                                 | 432 | 2 |
| zwischen Sächsisch und Erzgebirgisch                             | 432 | 2 |
| Vogtländisch-Erzgebirgisches Mischgebiet                         | 432 | 2 |
| helle Vokale                                                     | 112 | 1 |
| viele Zwischenlaute                                              | 121 | 1 |
| weiche Endungen                                                  | 142 | 1 |
| no (ja)                                                          | 312 | 1 |
| nu (ja)                                                          | 312 | 1 |
| gä (nicht wahr?)                                                 | 312 | 1 |
| Wo de Hos'n Hus'n has'n und de Hus'n Hos'n sei do sei mir drham. | 313 | 1 |
| Rennsteiglied                                                    | 313 | 1 |
| nij (nicht)                                                      | 321 | 1 |
| Ärzgebärgsch                                                     | 321 | 1 |
| anderes Sächsisch                                                | 411 | 1 |

|                                             |     |     |
|---------------------------------------------|-----|-----|
| nichts Spezielles                           | 411 | 1   |
| sprechen weich                              | 412 | 1   |
| westdeutscher Dialekt                       | 413 | 1   |
| fast eigene Sprechweise                     | 414 | 1   |
| die haben Komplexe                          | 415 | 1   |
| typisches Chemnitzerisches sächsisch        | 432 | 1   |
| Mitteldeutsch                               | 432 | 1   |
| Mischung aus Sächsisch und Hochdeutsch      | 432 | 1   |
| Zwischending von Vogtländisch und Sächsisch | 432 | 1   |
| Ostthüringisch                              | 432 | 1   |
| thüringisches Vogtländisch                  | 432 | 1   |
| Oberfranken                                 | 441 | 1   |
|                                             |     |     |
| Gesamtpunktwert                             |     | 520 |

Tabelle 84: Die assoziierten Einzelmerkmale der vogt.-erzgeb. Gruppe im Cluster 3

| Beschreibung                                                         | Subgruppe | Punktwert |
|----------------------------------------------------------------------|-----------|-----------|
| Bayerisch/ typisch Bayerisch                                         | 432       | 28        |
| Fränkisch                                                            | 432       | 23        |
| rollendes R                                                          | 123       | 16        |
| Oberfränkisch                                                        | 432       | 12        |
| jamoi                                                                | 312       | 9         |
| melodisch/ andere Sprachmelodie                                      | 132       | 8         |
| leichtes Bayerisch/ ähnlich wie Bayerisch/ Bayerisch und was anderes | 432       | 8         |
| Fränkisch-Bayerisch/ zwischen Fränkisch und Bayerisch                | 432       | 7         |
| konkrete Wortgruppen                                                 | 311       | 6         |
| so ähnlich wie Vogtländisch                                          | 432       | 6         |
| verständlich                                                         | 142       | 5         |
| schwer verständlich                                                  | 142       | 4         |
| viel [a]                                                             | 113       | 3         |
| wenig Zischlaute                                                     | 121       | 3         |
| kein [k]                                                             | 123       | 3         |
| Endungen verschlucken                                                | 220       | 3         |
| pferti [keine weiteren Angaben]                                      | 312       | 3         |
| nät (nicht)                                                          | 321       | 3         |
| Frängisch                                                            | 321       | 3         |
| dunkle Lautung                                                       | 412       | 3         |
| Westdeutsch                                                          | 413       | 3         |
| anders                                                               | 414       | 3         |
| gemütlich                                                            | 422       | 3         |
| Bayern                                                               | 441       | 3         |
| Franken                                                              | 441       | 3         |
| Oberfranken                                                          | 441       | 3         |
| kanscht                                                              | 321       | 2         |
| Deppi                                                                | 422       | 2         |
| Hessisch                                                             | 432       | 2         |
| erkennt man                                                          | 414       | 1         |
| eigene Sprechweise                                                   | 414       | 1         |
| regional unterschiedlich                                             | 431       | 1         |
| fast Hochdeutsch                                                     | 431       | 1         |

|                                             |     |     |
|---------------------------------------------|-----|-----|
| Bayerisch-Hessisch                          | 432 | 1   |
| Erzgebirgisch                               | 432 | 1   |
| Thüringisch                                 | 432 | 1   |
| Zwischending aus Vogtländisch und Fränkisch | 432 | 1   |
| Sachsen-Anhalt                              | 441 | 1   |
|                                             |     |     |
| Gesamtpunktwert                             |     | 189 |

Tabelle 85: Die assoziierten Einzelmerkmale der vogt.-erzgeb. Gruppe im Cluster 4

| Beschreibung                                                           | Subgruppe | Punktwert |
|------------------------------------------------------------------------|-----------|-----------|
| rollendes R                                                            | 123       | 45        |
| Lausitzer Dialekt/ Lausitzerisch/ Lausitzer Einschlag                  | 432       | 25        |
| icken/ icke                                                            | 321       | 15        |
| nu (ja)                                                                | 312       | 13        |
| Dresdner Sächsisch/ Dresdner Dialekt/ Dresdnerisch                     | 432       | 12        |
| Lausitz/ Lausitzer Gegend/ Lausitzer Ecke                              | 441       | 12        |
| Oberlausitz                                                            | 441       | 9         |
| Klangfarbe/ Melodie/ keine sächsische Sprachmelodie/<br>Singen/ Gesang | 132       | 8         |
| man hört es                                                            | 414       | 8         |
| Berlinerisch/ mehr Berlinerisch/ Richtung Berlinerisch                 | 432       | 8         |
| teilweise brandenburgische Färbung                                     | 432       | 8         |
| Ostsächsisch                                                           | 432       | 8         |
| Nord-Süd-gestaffelt                                                    | 442       | 8         |
| Oberlausitzisch                                                        | 432       | 7         |
| Brandenburg                                                            | 441       | 7         |
| Spreewald                                                              | 441       | 7         |
| Endungen verschlucken                                                  | 220       | 6         |
| Lausitzisch, das ist Hochdeutsch vermischt mit Sorbisch                | 432       | 6         |
| kehlig/ kehlige Aussprache                                             | 142       | 5         |
| ock [keine weiteren Angaben]                                           | 312       | 5         |
| sorbisch mit dabei/ sorbischer Einfluss                                | 432       | 5         |
| eigenartiges R                                                         | 123       | 4         |
| gewisse Betonung                                                       | 133       | 4         |
| eigene Art Sächsisch                                                   | 411       | 4         |
| lustig                                                                 | 422       | 4         |
| Vokale langgezogen                                                     | 112       | 3         |
| sch-Laute                                                              | 123       | 3         |
| g > j                                                                  | 123       | 3         |
| alles langgezogen                                                      | 142       | 3         |
| gerollt                                                                | 411       | 3         |
| anders als Dresdner Sprechweise                                        | 411       | 3         |
| sprechen weich                                                         | 412       | 3         |
| bisschen Sächsisch                                                     | 432       | 3         |
| Ursächsisch/ Ursprung vom Sächsischen                                  | 432       | 3         |
| Mischung Berlinern und Sächseln                                        | 432       | 3         |
| Erzgebirge                                                             | 441       | 3         |
| Niederlausitz                                                          | 441       | 3         |
| helle Vokale                                                           | 112       | 2         |
| viele Zwischenlaute                                                    | 121       | 2         |
| weiche Endungen                                                        | 142       | 2         |

|                                             |     |     |
|---------------------------------------------|-----|-----|
| andere Wörter als Mittelerzgebirgisch       | 311 | 2   |
| nor (ja)                                    | 312 | 2   |
| Glück auf                                   | 312 | 2   |
| Stulle (Scheibe Brot)                       | 312 | 2   |
| Schrippe (Brötchen)                         | 312 | 2   |
| kene                                        | 321 | 2   |
| kiek ma (schau mal)                         | 321 | 2   |
| Osterzgebirgisch                            | 432 | 2   |
| Übergang zwischen Sächsisch und Hochdeutsch | 432 | 2   |
| Mischung aus Sächsisch und Lausitzisch      | 432 | 2   |
| Sorbisch vermischt mit Sächsisch            | 432 | 2   |
| Randpolnisch                                | 432 | 2   |
| Preußen                                     | 441 | 2   |
| da oben                                     | 442 | 2   |
| Dresden-Brandenburg-Mischung                | 442 | 2   |
| Vokale                                      | 112 | 1   |
| ai > e                                      | 114 | 1   |
| kein [a]                                    | 114 | 1   |
| kein [e]                                    | 114 | 1   |
| ch > sch                                    | 123 | 1   |
| bestimmte Aussprache                        | 142 | 1   |
| verkürzt                                    | 142 | 1   |
| Zusammenziehung (hast, biste)               | 220 | 1   |
| itze (es ist)                               | 312 | 1   |
| git (geht)                                  | 321 | 1   |
| giste                                       | 321 | 1   |
| ma(o)l                                      | 321 | 1   |
| gimmorma (gehen wir mal)                    | 321 | 1   |
| kannste                                     | 321 | 1   |
| klingt normal                               | 411 | 1   |
| eigene Mundart                              | 411 | 1   |
| breit gesprochen                            | 412 | 1   |
| regional unterschiedlich                    | 431 | 1   |
| Stadtsprache                                | 431 | 1   |
| fast Hochdeutsch                            | 431 | 1   |
| nachlässiges Deutsch                        | 431 | 1   |
| Bayerisch und was anderes                   | 432 | 1   |
| Erzgebirgisch                               | 432 | 1   |
| Norddeutsch                                 | 432 | 1   |
| angelehnt am Sächsischen                    | 432 | 1   |
| Schlesischer Einfluss                       | 432 | 1   |
| Zittauer Gebirge                            | 441 | 1   |
| Vogtland                                    | 441 | 1   |
| Übergang von Zittau, Dresden und Spreewald  | 442 | 1   |
| Übergang von Zittau, Dresden und Sebnitz    | 442 | 1   |
|                                             |     |     |
| Gesamtpunktwert                             |     | 345 |

Tabelle 86: Die assoziierten Einzelmerkmale der vogt.-erzgeb. Gruppe im Cluster 5



| Beschreibung                                                                                               | Subgruppe | Punktwert |
|------------------------------------------------------------------------------------------------------------|-----------|-----------|
| Chemnitzer Sächsisch/ Chemnitzer Dialekt                                                                   | 432       | 37        |
| einfältig/ klingt gemein/ ordinär/ proletarisch/ schlampig/<br>trampelig/ nicht vornehm                    | 422       | 34        |
| Tonfall/ Melodie/ Singen/ Gesang/ mehr gesungen/ singen<br>ab Klingenthal                                  | 132       | 24        |
| man hört es                                                                                                | 414       | 24        |
| no (ja)                                                                                                    | 312       | 23        |
| Ursächsisch/ Ursprung vom Sächsischen/ ähnlich wie<br>Sächsisch/ allgemeines Sächsisch/ gemäßigt Sächsisch | 432       | 23        |
| Endungen verschlucken/ Endungen weglassen                                                                  | 220       | 22        |
| Erzgebirgisch/ erzgebirgische Mundart/ teilweise erzgebirgisch                                             | 432       | 22        |
| vertraut/ sich verbunden fühlen                                                                            | 412       | 19        |
| Verkürzungen (ran statt heran)/ Silben verschlucken                                                        | 220       | 16        |
| nor (ja)                                                                                                   | 312       | 16        |
| manchmal unverständlich/ nicht verständlich/ nuscheln/<br>vernuschelt                                      | 142       | 14        |
| eigene Begriffe/ andere Worte/ andere Wörter als<br>Mittelerzgebirgisch                                    | 311       | 11        |
| ni (nicht)                                                                                                 | 321       | 11        |
| weich/ alles weich ausgesprochen/ sprechen weich                                                           | 412       | 11        |
| Übergangsgebiet/ Mischmasch                                                                                | 442       | 11        |
| klingt normal/ nichts Spezielles                                                                           | 411       | 10        |
| so wie ich/ fast die eigene Sprechweise                                                                    | 414       | 10        |
| helle Laute werden dunkel und umgekehrt                                                                    | 111       | 9         |
| a > a(o)                                                                                                   | 114       | 9         |
| g > ch                                                                                                     | 123       | 9         |
| k > sch                                                                                                    | 123       | 9         |
| ch > sch                                                                                                   | 123       | 9         |
| Zusammenziehung von Worten (hast biste)                                                                    | 220       | 9         |
| itze (es ist)                                                                                              | 312       | 9         |
| git (geht)                                                                                                 | 321       | 9         |
| giste                                                                                                      | 321       | 9         |
| ma(o)l                                                                                                     | 321       | 9         |
| gimmorma (gehen wir mal)                                                                                   | 321       | 9         |
| weiches [g]                                                                                                | 123       | 8         |
| bequemes sprechen                                                                                          | 142       | 8         |
| newar (nicht wahr?)                                                                                        | 321       | 8         |
| nicht so wie Leipziger Sprechweise                                                                         | 432       | 8         |
| Raum Chemnitz                                                                                              | 441       | 8         |
| a > o                                                                                                      | 114       | 7         |
| kein [k]                                                                                                   | 123       | 7         |
| schlechte Sprechweise                                                                                      | 142       | 7         |
| zusammengezogene Aussprache                                                                                | 142       | 7         |
| wenige Silben                                                                                              | 220       | 7         |
| nee (nein)                                                                                                 | 321       | 7         |
| gsän (gesehen)                                                                                             | 321       | 7         |
| isch                                                                                                       | 321       | 7         |
| kein [a]                                                                                                   | 114       | 6         |
| kein [e]                                                                                                   | 114       | 6         |
| nu (ja)                                                                                                    | 312       | 6         |
| breit gesprochen/ breite Aussprache                                                                        | 412       | 6         |

|                                                       |     |   |
|-------------------------------------------------------|-----|---|
| man hört den Unterschied zu Dresden und Leipzig       | 414 | 6 |
| nachlässiges Deutsch                                  | 431 | 6 |
| Vogtländisch                                          | 432 | 6 |
| Mischung aus Sächsisch, Erzgebirgisch und Hochdeutsch | 442 | 6 |
| nicht so langgezogen                                  | 142 | 5 |
| nät (nicht)                                           | 321 | 5 |
| Vogtländisch-Erzgebirgisch                            | 432 | 5 |
| Übergang von Leipzig nach Dresden                     | 442 | 5 |
| t > d                                                 | 123 | 4 |
| Bam (Baum)/ Bamer /Bäume                              | 321 | 4 |
| Vokale langgezogen                                    | 112 | 3 |
| k > g                                                 | 123 | 3 |
| Endungen komisch                                      | 142 | 3 |
| lassen was weg                                        | 142 | 3 |
| [e] angehängt auch bei Vokalen                        | 220 | 3 |
| Deijlitzsch (Delitzsch)                               | 321 | 3 |
| Döubeln (Döbeln)                                      | 321 | 3 |
| Mitweid-e                                             | 321 | 3 |
| Mitweda (Mitweida)                                    | 321 | 3 |
| Dresdner Sächsisch/ Dresdnerisch                      | 432 | 3 |
| Osterzgebirgisch                                      | 432 | 3 |
| anders als Chemnitz aber nah dran                     | 441 | 3 |
| Mischformen von allen Sächsischarten                  | 442 | 3 |
| ai > e                                                | 114 | 2 |
| sch-Laute                                             | 123 | 2 |
| Abkürzungen                                           | 220 | 2 |
| nä (nicht wahr?)                                      | 312 | 2 |
| Glück auf                                             | 312 | 2 |
| Bemme (Scheibe Brot)                                  | 312 | 2 |
| gloar (klar)                                          | 321 | 2 |
| Ärzgebärgsch                                          | 321 | 2 |
| weste                                                 | 321 | 2 |
| a                                                     | 321 | 2 |
| hammor (haben wir)                                    | 321 | 2 |
| Greez                                                 | 321 | 2 |
| maad (Mädchen)                                        | 321 | 2 |
| Stadtsprache                                          | 431 | 2 |
| ähnlich wie Chemnitzerisch und Dresdnerisch           | 432 | 2 |
| Westsächsisch                                         | 432 | 2 |
| zwischen Sächsisch und Bayerisch                      | 432 | 2 |
| sächsisches Erzgebirgisch                             | 432 | 2 |
| Thüringer Dialekt/ Thüringisch                        | 432 | 2 |
| ähnlich wie Vogtländisch aber eigenständig            | 432 | 2 |
| Vokale unsauber                                       | 112 | 1 |
| viel a(o)                                             | 114 | 1 |
| kehlilig                                              | 142 | 1 |
| langgezogene Aussprache                               | 142 | 1 |
| Behndrelade (Fahrrad)                                 | 312 | 1 |
| gä (nicht wahr?)                                      | 312 | 1 |
| nisch (nicht)                                         | 321 | 1 |
| Dynamou                                               | 321 | 1 |
| Brud (Bruder)                                         | 321 | 1 |
| Vat (Vater)                                           | 321 | 1 |

|                                                   |     |     |
|---------------------------------------------------|-----|-----|
| Gag (Jacke)                                       | 321 | 1   |
| nicht so auffällig wie Vogtländisch               | 411 | 1   |
| anders als Klingenthal                            | 411 | 1   |
| eigene Mundart                                    | 411 | 1   |
| in sich verschieden                               | 411 | 1   |
| regional unterschiedlich                          | 431 | 1   |
| fast Hochdeutsch                                  | 431 | 1   |
| Mischung aus Erzgebirgisch und Dresdner Sächsisch | 432 | 1   |
| Mischung aus Sächsisch und Hochdeutsch            | 432 | 1   |
| Einfluss vom Sächsischen und Vogtländischen       | 432 | 1   |
| ähnlich wie Sprechweise in Schneeberg             | 432 | 1   |
| Erzgebirge                                        | 441 | 1   |
| Übergang Erzgebirge und Vogtland                  | 442 | 1   |
| Mischung aus Chemnitz und Dresden                 | 442 | 1   |
|                                                   |     |     |
| Gesamtpunktwert                                   |     | 712 |

Tabelle 87: Die assoziierten Einzelmerkmale der vogt.-erzgeb. Gruppe im Cluster 6

| Beschreibung                                                                     | Subgruppe | Punktwert |
|----------------------------------------------------------------------------------|-----------|-----------|
| Klangfarbe/ melodisch/ Singen/ Gesang/ singend/ Sing-Sang/ singen ab Klingenthal | 132       | 50        |
| nu (ja)                                                                          | 312       | 47        |
| Dresdner Sächsisch/ Dresdner Dialekt/ Dresdnerisch                               | 432       | 47        |
| man hört es                                                                      | 414       | 23        |
| alles langgezogen/ langgezogene Aussprache                                       | 142       | 21        |
| nor (ja)                                                                         | 312       | 19        |
| alles weich ausgesprochen/ sehr weich/ sprechen weich                            | 412       | 17        |
| sch-Laute                                                                        | 123       | 16        |
| Ursprung vom Sächsischen                                                         | 432       | 12        |
| ni (nicht)                                                                       | 321       | 10        |
| gemütlich                                                                        | 422       | 8         |
| rollendes R                                                                      | 123       | 7         |
| Zusammenziehung (hast biste)/ Verkürzungen /ran statt heran)                     | 220       | 7         |
| kein [a]                                                                         | 114       | 6         |
| kein [e]                                                                         | 114       | 6         |
| Endungen verschlucken                                                            | 220       | 6         |
| nachlässiges Deutsch                                                             | 431       | 6         |
| Erzgebirgisch/ erzgebirgische Mundart                                            | 432       | 6         |
| ch > sch                                                                         | 123       | 5         |
| gewisse Betonung                                                                 | 133       | 5         |
| bestimmte Aussprache                                                             | 142       | 5         |
| nu-nu (ja-ja)                                                                    | 312       | 5         |
| itze (es ist)                                                                    | 312       | 5         |
| git (geht)                                                                       | 321       | 5         |
| giste                                                                            | 321       | 5         |
| ma(o)l                                                                           | 321       | 5         |
| gimmorma (gehen wir mal)                                                         | 321       | 5         |
| breit gesprochen/ breite Aussprache                                              | 412       | 5         |
| langgezogene Vokale                                                              | 112       | 4         |
| Vokale                                                                           | 112       | 4         |

|                                                   |     |   |
|---------------------------------------------------|-----|---|
| a > a(o)                                          | 114 | 4 |
| ai > e                                            | 114 | 4 |
| keine harten Konsonanten                          | 121 | 4 |
| [d] stärker                                       | 123 | 4 |
| [g] stärker                                       | 123 | 4 |
| Dräsdén                                           | 321 | 4 |
| fein                                              | 412 | 4 |
| langsam                                           | 412 | 4 |
| tragend                                           | 412 | 4 |
| emotionale Sprache                                | 412 | 4 |
| wie Tom Pauls                                     | 414 | 4 |
| so wie ich                                        | 414 | 4 |
| abgehoben                                         | 422 | 4 |
| helle Vokale                                      | 112 | 3 |
| Vokale unsauber                                   | 112 | 3 |
| viele Zwischenlaute                               | 121 | 3 |
| weiche Endungen                                   | 142 | 3 |
| Dynamou                                           | 321 | 3 |
| proletarisch                                      | 422 | 3 |
| Lausitzer Dialekt/ Lausitzerisch                  | 432 | 3 |
| Übergang von Dresden zu Zittau über Sebnitz       | 442 | 3 |
| helle Laute werden dunkel und umgekehrt           | 111 | 2 |
| g > ch                                            | 123 | 2 |
| k > sch                                           | 123 | 2 |
| besser verständlich                               | 142 | 2 |
| nu (nicht wahr?)                                  | 312 | 2 |
| Bam (Baum)/ Bamer (Bäume)                         | 321 | 2 |
| sich verbunden fühlen                             | 414 | 2 |
| Leipzigerisch/ Leipziger Dialekt                  | 432 | 2 |
| ähnlich wie Sprechweise in Schneeberg             | 432 | 2 |
| Elbisch                                           | 432 | 2 |
| Erzgebirge                                        | 441 | 2 |
| e > a                                             | 114 | 1 |
| kein [k]                                          | 123 | 1 |
| k > g                                             | 123 | 1 |
| eigenartiges R                                    | 123 | 1 |
| manchmal unverständlich                           | 142 | 1 |
| eigene Begriffe                                   | 311 | 1 |
| no (ja)                                           | 312 | 1 |
| Frängisch                                         | 321 | 1 |
| maad (Mädchen)                                    | 321 | 1 |
| anders als Dresden                                | 411 | 1 |
| eigene Art Sächsisch                              | 411 | 1 |
| anders                                            | 414 | 1 |
| lustig                                            | 422 | 1 |
| Bayerisch und was anderes                         | 432 | 1 |
| erzgebirgisches Sächsisch                         | 432 | 1 |
| Fränkisch                                         | 432 | 1 |
| Oberlausitzisch                                   | 432 | 1 |
| Osterzgebirgisch                                  | 432 | 1 |
| Mischung aus Erzgebirgisch und Dresdner Sächsisch | 432 | 1 |
| Mischung aus Sächsisch und Lausitzerisch          | 432 | 1 |
| Mischung aus Sächsisch und Vogtländisch           | 432 | 1 |

|                                            |     |     |
|--------------------------------------------|-----|-----|
| ähnlich wie Vogtländisch aber eigenständig | 432 | 1   |
| Randpolnisch                               | 432 | 1   |
| Lausitz                                    | 441 | 1   |
| Vogtland                                   | 441 | 1   |
| Übergangsgebiet                            | 442 | 1   |
| Mischformen von allen Sächsischarten       | 442 | 1   |
|                                            |     |     |
| Gesamtpunktwert                            |     | 497 |

Tabelle 88: Die assoziierten Einzelmerkmale der vogt.-erzgeb. Gruppe im Cluster 7

| Beschreibung                                                | Subgruppe | Punktwert |
|-------------------------------------------------------------|-----------|-----------|
| Thüringer Dialekt/ Thüringisch                              | 432       | 30        |
| man hört es/ erkennt man                                    | 414       | 8         |
| bestimmte Tonlage/ eigene Sprachmelodie/ singend/ singen so | 132       | 7         |
| gä (nicht wahr?)                                            | 312       | 4         |
| bisschen Sächsisch/ sächsln etwas                           | 432       | 4         |
| rollendes R                                                 | 123       | 2         |
| bestimmte Worte/ andere Begriffe                            | 311       | 2         |
| no (ja)                                                     | 312       | 2         |
| Servus (Tschüss)                                            | 312       | 2         |
| joa (ja)                                                    | 321       | 2         |
| anderes Sächsisch                                           | 411       | 2         |
| gaatschen weniger                                           | 411       | 2         |
| relativ gut/ nicht ganz so schlimm                          | 411       | 2         |
| sprechen weich                                              | 412       | 2         |
| vertraut                                                    | 414       | 2         |
| die haben Komplexe                                          | 415       | 2         |
| manchmal Hang zum Bayerischen                               | 432       | 2         |
| bisschen Hessisch                                           | 432       | 2         |
| Mitteldeutsch                                               | 432       | 2         |
| Vogtländisch                                                | 432       | 2         |
| Übergangsgebiet                                             | 442       | 2         |
| gälle (nicht wahr?)                                         | 312       | 1         |
| gäll (nicht wahr?)                                          | 312       | 1         |
| urwüchsig                                                   | 413       | 1         |
| Hochdeutsch                                                 | 431       | 1         |
| Erzgebirgisch                                               | 432       | 1         |
| Übergang vom Sächsischen zum Thüringischen                  | 432       | 1         |
| Ostthüringisch                                              | 432       | 1         |
| Vogtland                                                    | 441       | 1         |
|                                                             |           |           |
| Gesamtpunktwert                                             |           | 93        |

Tabelle 89: Die assoziierten Einzelmerkmale der vogt.-erzgeb. Gruppe im Cluster 8

| Beschreibung                                      | Subgruppe | Punktwert |
|---------------------------------------------------|-----------|-----------|
| Thüringisch/ Thüringer Dialekt                    | 432       | 27        |
| man hört es                                       | 414       | 11        |
| bestimmte Tonlage/ andere Sprachmelodie/ singend  | 132       | 7         |
| Anhaltinisch/ Sachsenanhaltinisch                 | 432       | 6         |
| Bayerisch                                         | 432       | 5         |
| bisschen Sächsisch                                | 432       | 4         |
| g > j                                             | 123       | 3         |
| Leipziger Sächsisch                               | 432       | 3         |
| Sachsen-Anhalt                                    | 441       | 3         |
| "nach" statt "zu" (ich gehe nach meiner Freundin) | 230       | 2         |
| konkrete Wortgruppen                              | 311       | 2         |
| gälle (nicht wahr?)                               | 312       | 2         |
| Servus (Tschüss)                                  | 312       | 2         |
| jamoi                                             | 312       | 2         |
| gä (nicht wahr?)                                  | 312       | 2         |
| joa (ja)                                          | 321       | 2         |
| anderes Sächsisch                                 | 411       | 2         |
| eigenartig                                        | 411       | 2         |
| gaatschen weniger                                 | 411       | 2         |
| sprechen weich                                    | 412       | 2         |
| hässliches Sächsisch/ proletarischer              | 422       | 2         |
| in Halle mehr Hochdeutsch                         | 431       | 2         |
| bisschen Hessisch                                 | 432       | 2         |
| Mitteldeutsch                                     | 432       | 2         |
| können kein [a] sprechen                          | 114       | 1         |
| können kein [e] sprechen                          | 114       | 1         |
| ch > sch                                          | 123       | 1         |
| Zusammenziehung (hast biste)                      | 220       | 1         |
| gäll (nicht wahr?)                                | 312       | 1         |
| na (ja)                                           | 312       | 1         |
| no (ja)                                           | 312       | 1         |
| itze (es ist)                                     | 312       | 1         |
| Rennsteiglied                                     | 313       | 1         |
| Läder                                             | 321       | 1         |
| Lährer                                            | 321       | 1         |
| git (geht)                                        | 321       | 1         |
| giste                                             | 321       | 1         |
| ma(o)l                                            | 321       | 1         |
| gimmorma (gehen wir mal)                          | 321       | 1         |
| dat                                               | 321       | 1         |
| dat                                               | 321       | 1         |
| icken                                             | 321       | 1         |
| Machdeburch (Magdeburg)                           | 321       | 1         |
| jut                                               | 321       | 1         |
| reiner                                            | 412       | 1         |
| vertraut                                          | 412       | 1         |
| urwüchsig                                         | 413       | 1         |

|                        |     |     |
|------------------------|-----|-----|
| westdeutscher Dialekt  | 413 | 1   |
| eigene Sprechweise     | 414 | 1   |
| nicht ganz so schlimm  | 422 | 1   |
| Hochdeutsch            | 431 | 1   |
| hochdeutsch angehaucht | 431 | 1   |
| Richtung Berlinisch    | 432 | 1   |
| Norddeutsch            | 432 | 1   |
| Spreewald              | 441 | 1   |
| Übergangsgebiet        | 442 | 1   |
|                        |     |     |
| Gesamtpunktwert        |     | 131 |

Tabelle 90: Die assoziierten Einzelmerkmale der vogt.-erzgeb. Gruppe im Cluster 9

| Beschreibung                                                                                                                                                             | Subgruppe | Punktwert |
|--------------------------------------------------------------------------------------------------------------------------------------------------------------------------|-----------|-----------|
| Thüringisch/ Thüringer Dialekt                                                                                                                                           | 432       | 58        |
| sächsischer Einschlag/ teils Sächsisch/ Randsächsisch/ bisschen Sächsisch                                                                                                | 432       | 35        |
| bestimmte Tonhöhe/ gewisse Melodie beim Sprechen/ Satzmelodie/ klingt anders/ sehr melodiös/ Satzmelodie singend/ singen bisschen                                        | 132       | 28        |
| Mischmasch von Thüringisch und Sächsisch/ Sächsisch in Thüringen                                                                                                         | 432       | 28        |
| klingt als wäre jemand blöde/ klingt ungebildet/ dreckig/ fauler Dialekt/ weniger freundlich als Dresdner Sächsisch/ schlimm/ weniger sympathisch als Dresdner Sächsisch | 422       | 26        |
| Thüringen                                                                                                                                                                | 441       | 22        |
| Übergänge/ Mischungen/ vermanscht                                                                                                                                        | 442       | 21        |
| gälle/ gäll (nicht wahr?)                                                                                                                                                | 312       | 18        |
| t > d                                                                                                                                                                    | 123       | 16        |
| man hört es/ erkennt man sofort                                                                                                                                          | 414       | 16        |
| a > o / kein [a] sondern [o] / bei Endung a > o                                                                                                                          | 114       | 15        |
| bestimmte Worte/ eigene Worte/ andere Redewendungen                                                                                                                      | 311       | 15        |
| ähnlich wie ich/ eigene Region                                                                                                                                           | 414       | 14        |
| Buchstaben verschlucken                                                                                                                                                  | 111       | 13        |
| no (ja)                                                                                                                                                                  | 312       | 13        |
| normal/ ganz normal/ klingt normal/ nichts Besonderes                                                                                                                    | 411       | 13        |
| breit getreten/ breit gezogen/ breit gemehrt/ breite Aussprache/ breitgelatschtes Thüringisch                                                                            | 412       | 12        |
| eher Hochdeutsch/ schätzen sich selbst Hochdeutsch ein/ steht der Aussprachenorm sehr nahe                                                                               | 431       | 12        |
| Sächsisch/ sächsisches Zentrum                                                                                                                                           | 432       | 11        |
| nicht verständlich/ nuscheln/ bisschen nuschelig                                                                                                                         | 142       | 10        |
| gä (nicht wahr?)                                                                                                                                                         | 312       | 10        |
| Gersche Fettbemmen                                                                                                                                                       | 415       | 10        |
| Ostthüringisch                                                                                                                                                           | 432       | 10        |
| p > b                                                                                                                                                                    | 123       | 9         |
| Endungen verschlucken/ verkürzen Endungen                                                                                                                                | 220       | 9         |
| Satzlänge                                                                                                                                                                | 240       | 8         |
| Anhaltinisch/ Sachsenanhaltinisch                                                                                                                                        | 432       | 8         |
| bisschen Thüringisch                                                                                                                                                     | 432       | 8         |
| Vokale verdreht                                                                                                                                                          | 112       | 7         |
| viele ä-Laute                                                                                                                                                            | 114       | 7         |

|                                                              |     |   |
|--------------------------------------------------------------|-----|---|
| [d, t] undeutlich                                            | 123 | 7 |
| gähen (gehen)                                                | 321 | 7 |
| vertraut                                                     | 412 | 7 |
| thüringisches Sächsisch                                      | 432 | 7 |
| zusammengezogen/ ziehen einige Wörter zusammen               | 142 | 6 |
| vereinfachen alles                                           | 142 | 6 |
| Arper (Kartoffel)                                            | 312 | 6 |
| Spack (Speck)                                                | 321 | 6 |
| kum ma ha (komm mal her)                                     | 321 | 6 |
| langgezogene Vokale                                          | 112 | 5 |
| Vokale anders/ Vokale anders/ Vokale verfremdet              | 112 | 5 |
| viel <o>                                                     | 113 | 5 |
| bequeme Aussprache                                           | 142 | 5 |
| versteht jeder                                               | 142 | 5 |
| alles ein Brei                                               | 142 | 5 |
| liebervoll/ niedlich/ klingt niedlich/ nicht hässlich/ schön | 422 | 5 |
| g > j                                                        | 123 | 4 |
| verschlucken viel                                            | 142 | 4 |
| Vogtländisch                                                 | 432 | 4 |
| Betonung auf [a]                                             | 133 | 3 |
| verwechselbar mit Sächsisch                                  | 411 | 3 |
| wie Großmutter/ wie Katharina Witt                           | 414 | 3 |
| ähnlich Erzgebirgisch                                        | 432 | 3 |
| Leipziger Sächsisch                                          | 432 | 3 |
| Vogtland                                                     | 441 | 3 |
| zwischen Erzgebirge und Thüringen                            | 442 | 3 |
| Randzone Sachsen                                             | 442 | 3 |
| gedehnte Laute                                               | 111 | 2 |
| Vokale verschlucken                                          | 112 | 2 |
| viel [a(o)]                                                  | 114 | 2 |
| g > ch                                                       | 123 | 2 |
| Bemme (Scheibe Brot)                                         | 312 | 2 |
| Auerbachs Keller                                             | 313 | 2 |
| geror (Gera)                                                 | 321 | 2 |
| jesacht                                                      | 321 | 2 |
| etwas eigenes                                                | 411 | 2 |
| kantig                                                       | 412 | 2 |
| Kindheit                                                     | 414 | 2 |
| Hallenser Sächsisch                                          | 432 | 2 |
| Mischung Thüringer Wald und Vogtland                         | 442 | 2 |
| verzerrte Selbstlaute                                        | 112 | 1 |
| [e] auseinandergezogen                                       | 114 | 1 |
| kurze Selbstlaute                                            | 114 | 1 |
| e > eij                                                      | 114 | 1 |
| kein [k]                                                     | 123 | 1 |
| kein [p]                                                     | 123 | 1 |
| weiches [sch] statt [g]                                      | 123 | 1 |
| kehlilig                                                     | 142 | 1 |
| klingt abgehackt                                             | 142 | 1 |
| Wörter verändert                                             | 220 | 1 |
| jälle (nicht wahr?)                                          | 312 | 1 |
| wa - Anhang                                                  | 312 | 1 |
| nu (ja)                                                      | 312 | 1 |



|                                     |     |     |
|-------------------------------------|-----|-----|
| Arzgebirge                          | 321 | 1   |
| Batt (Bad)                          | 321 | 1   |
| Kiewe (Kühe)                        | 321 | 1   |
| Deijlitzsch (Delitzsch)             | 321 | 1   |
| gemajetze (gehen wir jetzt)         | 321 | 1   |
| ick                                 | 321 | 1   |
| Droscherie                          | 321 | 1   |
| zuch (zug)                          | 321 | 1   |
| Weltunterjang                       | 321 | 1   |
| klingt gewohnt                      | 411 | 1   |
| komischer Dialekt                   | 411 | 1   |
| viele Leute auch von außerhalb      | 411 | 1   |
| klingt weich                        | 412 | 1   |
| nicht hart                          | 412 | 1   |
| härter als Dresdner Sächsisch       | 412 | 1   |
| nicht so rund                       | 412 | 1   |
| poltrig                             | 412 | 1   |
| deftig                              | 412 | 1   |
| wabrig                              | 412 | 1   |
| gähmig                              | 413 | 1   |
| Löffelschnitzer                     | 415 | 1   |
| dörflich                            | 422 | 1   |
| nicht dumm                          | 422 | 1   |
| keine Gemütlichkeit                 | 422 | 1   |
| Silben nicht Hochdeutsch gesprochen | 431 | 1   |
| mit Akzent                          | 431 | 1   |
| bisschen Bayerisch                  | 432 | 1   |
| nicht Berlinerisch                  | 432 | 1   |
| ähnlich Berlinerisch                | 432 | 1   |
| Richtung Harzer Dialekt             | 432 | 1   |
| nicht Harzer Dialekt                | 432 | 1   |
| Westsächsisch                       | 432 | 1   |
| Anhaltinisch-Sächsisch              | 432 | 1   |
| nicht Süddeutsch                    | 432 | 1   |
| thüringischer Stadtdialekt          | 432 | 1   |
| Oberthüringisch                     | 432 | 1   |
| Sachsen-Anhalt                      | 441 | 1   |
| Sachsen und Großraum Sachsen        | 441 | 1   |
| Westsachsen                         | 441 | 1   |
| Erzgebirge und Randgebiete          | 441 | 1   |
| Leipziger Ecke                      | 441 | 1   |
|                                     |     |     |
| Gesamtpunktwert                     |     | 671 |

Tabelle 91: Die assoziierten Einzelmerkmale der thüringischen Gruppe im Cluster 1

| Beschreibung                                                                                                             | Subgruppe | Punktwert |
|--------------------------------------------------------------------------------------------------------------------------|-----------|-----------|
| Erzgebirgisch/ Richtung Erzgebirgisch                                                                                    | 432       | 28        |
| Sächsisch/ richtiges Sächsisch/ sächsln                                                                                  | 432       | 23        |
| klingt als wäre jemand blöde/ klingt ungebildet/ weniger freundlich als Dresdner Sächsisch/ fürchterliche Sprache/ plump | 422       | 21        |
| man hört es/ erkennt man                                                                                                 | 414       | 20        |
| breit getreten/ breit gemehrt/ breit gesprochen/ breite Aussprache                                                       | 412       | 18        |
| sehr melodios/ klingt anders/ Satzmelodie singend/ singend/ singen ähnlich wie im Erzgebirge                             | 132       | 16        |
| gemütlich/ nicht hässlich/ niedlich/ fast romantisch/ schön/ nicht dumm                                                  | 422       | 13        |
| Sachsen/ Sachsen und Großraum Sachsen                                                                                    | 441       | 13        |
| Erzgebirge/ Erzgebirge und Randgebiete                                                                                   | 441       | 13        |
| langgezogene Aussprache/ gedehnt/ mehrig                                                                                 | 142       | 11        |
| bestimmte Redewendungen/ andere Ausdrücke/ eigene Worte                                                                  | 311       | 9         |
| ähnlich wie Leipziger Dialekt                                                                                            | 432       | 8         |
| Vogtländisch                                                                                                             | 432       | 8         |
| Bergregion/ gebirgig                                                                                                     | 442       | 8         |
| Vokale lang ausgesprochen                                                                                                | 112       | 7         |
| rollendes R                                                                                                              | 123       | 7         |
| bisschen Sächsisch/ leichtes Sächsisch/ nicht ganz so stark sächsln/ spezielles Sächsisch                                | 432       | 7         |
| eigen/ eigene Mundart                                                                                                    | 411       | 6         |
| Abkürzungen                                                                                                              | 220       | 5         |
| Arzgebirge                                                                                                               | 321       | 5         |
| mai Frau (meine Frau)                                                                                                    | 321       | 5         |
| sprechen weich/ klingt weich                                                                                             | 412       | 5         |
| nicht hart                                                                                                               | 412       | 5         |
| Westsächsisch                                                                                                            | 432       | 5         |
| bisschen Thüringisch                                                                                                     | 432       | 5         |
| Übergangsgebiet/ Übergänge/ Mischformen                                                                                  | 442       | 5         |
| Vokale verändert                                                                                                         | 112       | 4         |
| [e] auseinandergezogen                                                                                                   | 114       | 4         |
| Arbeiterstadt                                                                                                            | 313       | 4         |
| newar (nicht wahr?)                                                                                                      | 321       | 4         |
| härter als Dresdner Dialekt                                                                                              | 412       | 4         |
| kantiger                                                                                                                 | 412       | 4         |
| wie Großmutter/ wie Katharina Witt                                                                                       | 414       | 4         |
| ähnlich wie Dresden                                                                                                      | 432       | 4         |
| viel [o, u]                                                                                                              | 113       | 3         |
| kein [o]                                                                                                                 | 114       | 3         |
| kein [u]                                                                                                                 | 114       | 3         |
| keine harten Konsonanten                                                                                                 | 121       | 3         |
| Konsonanten weich                                                                                                        | 122       | 3         |
| kein [k]                                                                                                                 | 123       | 3         |
| kein [p]                                                                                                                 | 123       | 3         |
| [p, t, k] weich                                                                                                          | 123       | 3         |

|                                                                  |     |   |
|------------------------------------------------------------------|-----|---|
| t > d                                                            | 123 | 3 |
| ch > sch                                                         | 123 | 3 |
| anderer Zungenschlag                                             | 142 | 3 |
| Lied vom Vogelbeerbam                                            | 313 | 3 |
| extremer                                                         | 412 | 3 |
| ähnlich wie wir/ eigene Region                                   | 414 | 3 |
| Bayerisch                                                        | 432 | 3 |
| Thüringisch                                                      | 432 | 3 |
| Bergdialekt                                                      | 432 | 3 |
| Westsachsen                                                      | 441 | 3 |
| Thüringer Wald                                                   | 441 | 3 |
| Vogtland                                                         | 441 | 3 |
| viel [a, o]                                                      | 113 | 2 |
| viel [a(o)]                                                      | 114 | 2 |
| a > o                                                            | 114 | 2 |
| p > b                                                            | 123 | 2 |
| k > g                                                            | 123 | 2 |
| nicht so gesungen                                                | 132 | 2 |
| klingt nicht so gut ausgedrückt                                  | 141 | 2 |
| ziehen einige Worte zusammen                                     | 220 | 2 |
| Endungen verschlucken                                            | 220 | 2 |
| gälle (nicht wahr?)                                              | 312 | 2 |
| nu (ja)                                                          | 312 | 2 |
| gä (nicht wahr?)                                                 | 312 | 2 |
| Wo de Hos'n Hus'n has'n und de Hus'n Hos'n sei do sei mir drham. | 313 | 2 |
| Rachelmannel                                                     | 313 | 2 |
| ba(o)rdi                                                         | 321 | 2 |
| nochema(o)                                                       | 321 | 2 |
| och (auch)                                                       | 321 | 2 |
| gemajetze (gehen wir jetzt)                                      | 321 | 2 |
| Bahif (Bahnhof)                                                  | 321 | 2 |
| eigenartiger dialekt                                             | 411 | 2 |
| nicht so breit                                                   | 412 | 2 |
| Schluchtenjodler                                                 | 415 | 2 |
| Sächsischanhaltinisch                                            | 432 | 2 |
| Berliner Dialekt                                                 | 432 | 2 |
| Sächsisches Erzgebirgisch                                        | 432 | 2 |
| Vogtländisch-Sächsisch                                           | 432 | 2 |
| zwischen Erzgebirge und Thüringen                                | 442 | 2 |
| verzerrte Selbstlaute                                            | 112 | 1 |
| Vokale verdreht                                                  | 112 | 1 |
| [ä] gedehnt                                                      | 114 | 1 |
| viele Vokale zu [u]                                              | 114 | 1 |
| e > ej                                                           | 114 | 1 |
| keine Harten                                                     | 121 | 1 |
| [d, t] undeutlich                                                | 123 | 1 |
| R stärker ausgeprägt                                             | 123 | 1 |
| [e] betont                                                       | 133 | 1 |
| kehlilig                                                         | 142 | 1 |
| nasal                                                            | 142 | 1 |
| nicht verständlich                                               | 142 | 1 |
| Satzlänge                                                        | 240 | 1 |

|                                              |     |     |
|----------------------------------------------|-----|-----|
| no (ja)                                      | 312 | 1   |
| Deijlitzsch (Delitzsch)                      | 321 | 1   |
| ganz normal                                  | 411 | 1   |
| nicht so rund                                | 412 | 1   |
| nicht so schnell                             | 412 | 1   |
| deftig                                       | 412 | 1   |
| heftig                                       | 412 | 1   |
| wabrig                                       | 412 | 1   |
| gähmig                                       | 413 | 1   |
| Erzgebirgler                                 | 415 | 1   |
| Löffelschnitzer                              | 415 | 1   |
| stark dialektal                              | 431 | 1   |
| mit Akzent                                   | 431 | 1   |
| steht der Aussprachenorm sehr nahe           | 431 | 1   |
| Fränkisch                                    | 432 | 1   |
| Harzer Dialekt                               | 432 | 1   |
| Mischung aus Thüringisch und Sächsisch       | 432 | 1   |
| thüringisches Sächsisch                      | 432 | 1   |
| Oberthüringisch                              | 432 | 1   |
| Mischung aus Fränkisch-Thüringisch-Sächsisch | 432 | 1   |
| Sachsen-Anhalt                               | 441 | 1   |
| Leipziger Gegend                             | 441 | 1   |
| Richtung Osten                               | 442 | 1   |
|                                              |     |     |
| Gesamtpunktwert                              |     | 458 |

Tabelle 92: Die assoziierten Einzelmerkmale der thüringischen Gruppe im Cluster 2

| Beschreibung                                                                             | Subgruppe | Punktwert |
|------------------------------------------------------------------------------------------|-----------|-----------|
| Fränkisch                                                                                | 432       | 30        |
| Bayerisch/ bayerischer Dialekt/ bisschen Bayerisch/ zum Bayerischen hin                  | 432       | 29        |
| rollendes R / bisschen rollendes R / gerolltes R mit der Zunge / starkes R mit der Zunge | 123       | 27        |
| Franken                                                                                  | 441       | 16        |
| man hört es/ erkennt man gleich                                                          | 414       | 14        |
| eigene Worte/ andere Begriffe                                                            | 311       | 9         |
| manchmal schwer verständlich/ schwer verständlich/ bisschen nuschelig                    | 142       | 7         |
| klingt gemütlich/ nicht so plump/ fast romantisch                                        | 422       | 7         |
| Vogtländisch/ Vuuchtländisch                                                             | 432       | 7         |
| ai-Laute                                                                                 | 113       | 6         |
| Oberfränkisch                                                                            | 432       | 6         |
| Bayern                                                                                   | 441       | 6         |
| Gleichklang/ nicht so gesungen                                                           | 132       | 4         |
| [e] betont                                                                               | 133       | 4         |
| sprechen ziemlich klar/ klares Deutsch                                                   | 142       | 4         |
| langgezogene Aussprache/ mehrig                                                          | 142       | 4         |
| unauffällig                                                                              | 411       | 4         |
| Hessisch                                                                                 | 432       | 4         |
| Vokale deutlicher                                                                        | 112       | 3         |
| ei > oa                                                                                  | 114       | 3         |

|                                                             |     |     |
|-------------------------------------------------------------|-----|-----|
| keine harten Konsonanten                                    | 121 | 3   |
| R stärker ausgeprägt                                        | 123 | 3   |
| singend/ mehr gesungen/ singen so ähnlich wie im Erzgebirge | 132 | 3   |
| -l angehängt                                                | 220 | 3   |
| fahren auf statt fahren nach                                | 230 | 3   |
| gälle/ gäll (nicht wahr?)                                   | 312 | 3   |
| harte Aussprache                                            | 412 | 3   |
| feiner                                                      | 412 | 3   |
| klingt trocken                                              | 412 | 3   |
| rund                                                        | 412 | 3   |
| nicht kalt                                                  | 412 | 3   |
| anheimelnd                                                  | 412 | 3   |
| ähnlich wie Thüringer Wald                                  | 441 | 3   |
| Oberfranken                                                 | 441 | 3   |
| westliche Gegend                                            | 442 | 3   |
| westlicher Teil Deutschlands                                | 442 | 3   |
| eigene Mundart/ was eigenes                                 | 411 | 2   |
| Kurorte                                                     | 411 | 2   |
| breit gesprochen/ breite Aussprache                         | 412 | 2   |
| leicht                                                      | 412 | 2   |
| Sächsisch                                                   | 432 | 2   |
| Vogtland                                                    | 441 | 2   |
| Vokale lang ausgesprochen                                   | 112 | 1   |
| Vokalveränderung                                            | 112 | 1   |
| viele ä-Laute                                               | 114 | 1   |
| bei Endung a > o                                            | 114 | 1   |
| viele Vokale zu [u]                                         | 114 | 1   |
| Abkürzungen                                                 | 220 | 1   |
| gä (nicht wahr?)                                            | 312 | 1   |
| newar (nicht wahr?)                                         | 321 | 1   |
| gähen (gehen)                                               | 321 | 1   |
| Bahif (Bahnhof)                                             | 321 | 1   |
| mai Fra (meine Frau)                                        | 321 | 1   |
| Kuddelmuddel                                                | 411 | 1   |
| nicht so breit                                              | 412 | 1   |
| wie Großmutter                                              | 414 | 1   |
| Schluchtenjodler                                            | 415 | 1   |
| Erzgebirgisch                                               | 432 | 1   |
| nicht so wie Leipziger Dialekt                              | 432 | 1   |
| verwandt mit Westsächsischen                                | 432 | 1   |
| bisschen Sächsisch                                          | 432 | 1   |
| Mischung aus Sächsisch und Fränkisch                        | 432 | 1   |
| Thüringisch                                                 | 432 | 1   |
| da war ich überall schon                                    | 441 | 1   |
| Sachsen                                                     | 441 | 1   |
| Harzer Gegend                                               | 441 | 1   |
|                                                             |     |     |
| Gesamtpunktwert                                             |     | 278 |

Tabelle 93: Die assoziierten Einzelmerkmale der thüringischen Gruppe im Cluster 3

| Beschreibung                                                                                                                                                  | Subgruppe | Punktwert |
|---------------------------------------------------------------------------------------------------------------------------------------------------------------|-----------|-----------|
| Sächsisch/ richtiges Sächsisch/ Ursprung vom Sächsischen/ Zentrum des Sächsischen/ Hochsachsenburg                                                            | 432       | 83        |
| sehr melodisch/ Satzmelodie singend/ singend/ Sing-Sang/ leicht singender Tonfall/ nicht so sympathischer Gesang wie Dresden/ Klang bisschen wie Berlinerisch | 132       | 60        |
| man hört es/ erkennt man gleich                                                                                                                               | 414       | 59        |
| klingt als wäre jemand blöde/ klingt ungebildet/ dreckiges Sächsisch/ fürchterliche Sprache/ plump/ prollig/ weniger sympatisch als Dresdner Sächsisch        | 422       | 50        |
| gemütlich/ liebevoll/ niedlich/ schön                                                                                                                         | 422       | 31        |
| alles langezogen/ gedehnt/ mehrig                                                                                                                             | 142       | 30        |
| Sachsen/ Großraum Sachsen                                                                                                                                     | 441       | 23        |
| rollendes R / tendieren zum rollenden R                                                                                                                       | 123       | 22        |
| sehr weich/ sprechen weich/ klingt weich/ weicher sächsischer Dialekt                                                                                         | 412       | 22        |
| breit gemehrt/ breite Aussprache/ breites Sächsisch                                                                                                           | 412       | 19        |
| nicht hart                                                                                                                                                    | 412       | 16        |
| relativ gutes Hochdeutsch/ mehr Hochdeutsch/ verwaschenes Hochdeutsch/ sehr gutes Deutsch/ steht der Aussprachenorm sehr nahe                                 | 431       | 16        |
| k > g                                                                                                                                                         | 123       | 15        |
| Leipziger Sächsisch                                                                                                                                           | 432       | 15        |
| bestimmte Redewendungen/ bestimmte Worte                                                                                                                      | 311       | 14        |
| Vokale lang ausgesprochen                                                                                                                                     | 112       | 10        |
| Vokale anders/ Vokale verändert                                                                                                                               | 112       | 10        |
| ch > sch                                                                                                                                                      | 123       | 10        |
| Endungen verschlucken/ abgehackte verschluckte Wortendungen                                                                                                   | 220       | 10        |
| kein [k]                                                                                                                                                      | 123       | 9         |
| kein [p]                                                                                                                                                      | 123       | 9         |
| eigen/ was eigenes                                                                                                                                            | 411       | 9         |
| Berlinerisch/ Berliner Dialekt                                                                                                                                | 432       | 9         |
| keine harten Laute/ keine Harten                                                                                                                              | 121       | 8         |
| Konsonanten weich                                                                                                                                             | 122       | 8         |
| [p, t, k] weich                                                                                                                                               | 123       | 8         |
| heije [keine weiteren Angaben]                                                                                                                                | 312       | 8         |
| daheeme (zu Hause)                                                                                                                                            | 321       | 8         |
| Anhaltinisch/ Sachsenanhaltinisch                                                                                                                             | 432       | 8         |
| Dresdner Sächsisch                                                                                                                                            | 432       | 8         |
| bisschen Sächsisch                                                                                                                                            | 432       | 8         |
| nasal                                                                                                                                                         | 142       | 7         |
| wa (nicht wahr?)                                                                                                                                              | 312       | 7         |
| klingt gewohnt/ normal/ unauffällig                                                                                                                           | 411       | 7         |
| nicht so schnell                                                                                                                                              | 412       | 7         |
| langsam                                                                                                                                                       | 412       | 7         |
| deftig                                                                                                                                                        | 412       | 7         |
| nicht dumm                                                                                                                                                    | 422       | 7         |
| nicht hässlich                                                                                                                                                | 422       | 7         |
| Mischung aus Sächsisch und Hochdeutsch                                                                                                                        | 432       | 7         |
| Richtung Spreewald                                                                                                                                            | 441       | 7         |
| Übergangsgebiet/ Mischung                                                                                                                                     | 442       | 7         |
| ai > e                                                                                                                                                        | 114       | 6         |
| kein [ö]                                                                                                                                                      | 114       | 6         |

|                                        |     |   |
|----------------------------------------|-----|---|
| p > b                                  | 123 | 6 |
| t > d                                  | 123 | 6 |
| von unten aus dem Hals gesprochen      | 142 | 6 |
| ziehen einige Worte zusammen           | 220 | 6 |
| nu (ja)                                | 312 | 6 |
| gä (nicht wahr?)                       | 312 | 6 |
| och (auch)                             | 321 | 6 |
| gemajetze (gehen wir jetzt)            | 321 | 6 |
| härter/ harte Aussprache               | 412 | 6 |
| parodiert als DDR-Sprache              | 413 | 6 |
| nicht so wie Leipziger Dialekt         | 432 | 6 |
| Abart des Sächsischen/ Randsächsisch   | 432 | 6 |
| Kaffeesächsisch                        | 432 | 6 |
| Sachsen-Anhalt                         | 441 | 6 |
| Bergregion/ gebirgig                   | 442 | 6 |
| Wortausdrucksweise                     | 141 | 5 |
| no (ja)                                | 312 | 5 |
| Sorben                                 | 415 | 5 |
| Erzgebirgisch                          | 432 | 5 |
| Lausitzer Dialekt                      | 432 | 5 |
| Sorbisch                               | 432 | 5 |
| Thüringisch                            | 432 | 5 |
| Oberlausitz                            | 441 | 5 |
| Zittauer Gebirge                       | 441 | 5 |
| südlich von Berlin                     | 442 | 5 |
| Vokale verschlucken                    | 112 | 4 |
| viel [o, u]                            | 113 | 4 |
| keine harten Konsonanten               | 121 | 4 |
| Konsonanten anders                     | 122 | 4 |
| betonen im 1. Wort                     | 133 | 4 |
| klingt nicht so gut ausgedrückt        | 141 | 4 |
| andere Aussprache                      | 142 | 4 |
| nicht so abgehackt                     | 142 | 4 |
| Laibzsch (Leipzig)                     | 321 | 4 |
| nochema(o)                             | 321 | 4 |
| Draschden                              | 321 | 4 |
| wie Tom Pauls                          | 414 | 4 |
| thüringisches Sächsisch                | 432 | 4 |
| Leipziger Ecke/ Gegend um Leipzig      | 441 | 4 |
| oberhalb Oberlausitz                   | 442 | 4 |
| [e] auseinandergezogen                 | 114 | 3 |
| Kinn hängen lassen                     | 142 | 3 |
| versteht jeder                         | 142 | 3 |
| heißer Gaffee                          | 321 | 3 |
| gesetzt                                | 422 | 3 |
| Mischung aus Berlinern und Sächseln    | 432 | 3 |
| Thüringen                              | 441 | 3 |
| Erzgebirge/ Erzgebirge und Randgebiete | 441 | 3 |
| Norden/ nördlicher Raum                | 442 | 3 |
| zwischen Berlin und Küste              | 442 | 3 |
| viele o-Laute                          | 113 | 2 |
| [ä] gedehnt                            | 114 | 2 |
| bequeme Sprache                        | 142 | 2 |

|                                           |     |     |
|-------------------------------------------|-----|-----|
| nuschelig                                 | 142 | 2   |
| Silben etwas weniger                      | 220 | 2   |
| Arzgebirge                                | 321 | 2   |
| komischer Dialekt/ eigenartiger Dialekt   | 411 | 2   |
| freundliche Menschen                      | 422 | 2   |
| keine Gemütlichkeit                       | 422 | 2   |
| sächsisches Erzgebirgisch                 | 432 | 2   |
| Dresdner Ecke                             | 441 | 2   |
| wie an der Ostsee oben                    | 442 | 2   |
| verzerrte Selbstlaute                     | 112 | 1   |
| Vokale weniger übertrieben als in Sachsen | 112 | 1   |
| e > eij                                   | 114 | 1   |
| kein [o]                                  | 114 | 1   |
| kein [u]                                  | 114 | 1   |
| nicht so melodisch                        | 132 | 1   |
| vereinfachen alles                        | 142 | 1   |
| Lied vom Vogelbeerbam                     | 313 | 1   |
| Arbeiterstadt                             | 313 | 1   |
| Auerbachs Keller                          | 313 | 1   |
| ba(o)rdi                                  | 321 | 1   |
| Deijlitzsch (Delitzsch)                   | 321 | 1   |
| nicht so breit                            | 412 | 1   |
| kantig                                    | 412 | 1   |
| poltrig                                   | 412 | 1   |
| ruhig                                     | 412 | 1   |
| leicht                                    | 412 | 1   |
| eigene Region                             | 414 | 1   |
| Gersche Fettguschen                       | 415 | 1   |
| dörflich                                  | 422 | 1   |
| extrem Dorfdialekt                        | 431 | 1   |
| stark dialektal                           | 431 | 1   |
| Silben nicht Hochdeutsch gesprochen       | 431 | 1   |
| mehr Bayerisch                            | 432 | 1   |
| nicht Berlinerisch                        | 432 | 1   |
| nicht Harzer Dialekt                      | 432 | 1   |
| Norddeutsch                               | 432 | 1   |
| Anhaltinisch-Sächsisch                    | 432 | 1   |
| Mischung aus Thüringisch und Sächsisch    | 432 | 1   |
| Vogtländisch-Sächsisch                    | 432 | 1   |
| nicht Süddeutsch                          | 432 | 1   |
| Thüringer Wald                            | 441 | 1   |
| Vogtland                                  | 441 | 1   |
| Niederlausitz                             | 441 | 1   |
| Richtung Osten                            | 442 | 1   |
| Nordost                                   | 442 | 1   |
| Grenze Brandenburg                        | 442 | 1   |
|                                           |     |     |
| Gesamtpunktwert                           |     | 995 |

Tabelle 94: Die assoziierten Einzelmerkmale der thüringischen Gruppe im Cluster 4



| Beschreibung                                                                                                                                                  | Subgruppe | Punktwert |
|---------------------------------------------------------------------------------------------------------------------------------------------------------------|-----------|-----------|
| Anhaltinisch/ Sachsenanhaltinisch                                                                                                                             | 432       | 48        |
| man hört es/ erkennt man gleich                                                                                                                               | 414       | 21        |
| Sächsisch/ sächsisches Zentrum                                                                                                                                | 432       | 20        |
| klingt als wäre jemand blöde/ klingt ungebildet/<br>fürchterliche Sprache/ plump/ schlimm/ keine<br>Gemütlichkeit/ weniger sympathisch als Dresdner Sächsisch | 422       | 18        |
| Randsächsisch/ bisschen Sächsisch/ leichtes Sächsisch/ teils<br>Sächsisch                                                                                     | 432       | 16        |
| g > j                                                                                                                                                         | 123       | 14        |
| Sachsen-Anhalt                                                                                                                                                | 441       | 12        |
| wa (nicht wahr?) / wa-Anhang                                                                                                                                  | 312       | 11        |
| Thüringisch                                                                                                                                                   | 432       | 8         |
| nicht so melodisch/ Satzmelodie singend/ singen bisschen                                                                                                      | 132       | 7         |
| Hallenser Sächsisch/ Hallenser                                                                                                                                | 432       | 7         |
| Mischung aus Berlinern und Sächsisch                                                                                                                          | 432       | 7         |
| Mischung                                                                                                                                                      | 442       | 7         |
| Vokale weniger übertrieben als in Sachsen                                                                                                                     | 112       | 6         |
| kurze Selbstlaute                                                                                                                                             | 114       | 6         |
| g > weiches sch                                                                                                                                               | 123       | 6         |
| klingt abgehackt                                                                                                                                              | 142       | 6         |
| jälle (nicht wahr?)                                                                                                                                           | 312       | 6         |
| Batt (Bad)                                                                                                                                                    | 321       | 6         |
| Droscherie                                                                                                                                                    | 321       | 6         |
| Zuch (zug)                                                                                                                                                    | 321       | 6         |
| Weltunterjang                                                                                                                                                 | 321       | 6         |
| etwas eigenes                                                                                                                                                 | 411       | 6         |
| nicht so breit                                                                                                                                                | 412       | 6         |
| relativ gutes Hochdeutsch/ Hochdeutsch/ sehr gutes<br>Deutsch/ sprechen gut mit weniger Dialekt                                                               | 431       | 6         |
| Leipziger Ecke/ Richtung Leipzig/ Gegend um Leipzig                                                                                                           | 441       | 6         |
| kein [k]                                                                                                                                                      | 123       | 5         |
| kein [p]                                                                                                                                                      | 123       | 5         |
| [je]                                                                                                                                                          | 123       | 5         |
| Betonung auf [a]                                                                                                                                              | 133       | 5         |
| alles hängt zusammen                                                                                                                                          | 142       | 5         |
| Auerbachs Keller                                                                                                                                              | 313       | 5         |
| ick                                                                                                                                                           | 321       | 5         |
| ähnlich wie Berlinerisch                                                                                                                                      | 432       | 5         |
| Vokale anders/ Vokale verändert                                                                                                                               | 112       | 4         |
| g, k > j                                                                                                                                                      | 123       | 4         |
| Sachsen/ Sachsen und Großraum Sachsen                                                                                                                         | 441       | 4         |
| gedehnte Laute                                                                                                                                                | 111       | 3         |
| g > ch                                                                                                                                                        | 123       | 3         |
| Endungen verschlucken                                                                                                                                         | 220       | 3         |
| breite Aussprache                                                                                                                                             | 412       | 3         |
| Thüringen                                                                                                                                                     | 441       | 3         |
| Konsonanten anders                                                                                                                                            | 122       | 2         |
| p > b                                                                                                                                                         | 123       | 2         |
| t > d                                                                                                                                                         | 123       | 2         |
| k > g                                                                                                                                                         | 123       | 2         |
| klingt nicht so gut ausgedrückt                                                                                                                               | 141       | 2         |
| ziehen einige Worte zusammen                                                                                                                                  | 220       | 2         |
| nu (ja)                                                                                                                                                       | 312       | 2         |

|                                                                                  |     |     |
|----------------------------------------------------------------------------------|-----|-----|
| gä (nicht wahr?)                                                                 | 312 | 2   |
| Aus Halle kommen die ganzen Dummen her und in Bitterfeld werden sie hergestellt. | 313 | 2   |
| Laibzsch (Leipzig)                                                               | 321 | 2   |
| nochema(o)                                                                       | 321 | 2   |
| och (auch)                                                                       | 321 | 2   |
| gemajetze (gehen wir jetzt)                                                      | 321 | 2   |
| jesacht                                                                          | 321 | 2   |
| unauffälliger Dialekt                                                            | 411 | 2   |
| klingt weich                                                                     | 412 | 2   |
| nicht hart                                                                       | 412 | 2   |
| schön                                                                            | 422 | 2   |
| geht in Harz über                                                                | 441 | 2   |
| Mansfelder Bereich                                                               | 441 | 2   |
| Konsonanten weich                                                                | 122 | 1   |
| [p, t, k] weich                                                                  | 123 | 1   |
| ch > sch                                                                         | 123 | 1   |
| betonen im 1. Wort                                                               | 133 | 1   |
| Kinn hängen lassen                                                               | 142 | 1   |
| bequeme Sprache                                                                  | 142 | 1   |
| versteht jeder                                                                   | 142 | 1   |
| gedehnt                                                                          | 142 | 1   |
| nicht so abgehackt                                                               | 142 | 1   |
| Wörter verändert                                                                 | 220 | 1   |
| eigene Worte                                                                     | 311 | 1   |
| gälle (nicht wahr?)                                                              | 312 | 1   |
| Arper (Kartoffel)                                                                | 312 | 1   |
| Spack (Speck)                                                                    | 321 | 1   |
| Kiewe (Kühe)                                                                     | 321 | 1   |
| kum ma ha (komm mal her)                                                         | 321 | 1   |
| ganz normal                                                                      | 411 | 1   |
| Mischung aus Sächsisch und Anhaltinisch                                          | 432 | 1   |
| thüringisches Sächsisch                                                          | 432 | 1   |
| Richtung Berlin                                                                  | 441 | 1   |
|                                                                                  |     |     |
| Gesamtpunktwert                                                                  |     | 401 |

Tabelle 95: Die assoziierten Einzelmerkmale der thüringischen Gruppe im Cluster 5

| Beschreibung                                                                                              | Subgruppe | Punktwert |
|-----------------------------------------------------------------------------------------------------------|-----------|-----------|
| Sächsisch/ Ursächsisch                                                                                    | 432       | 128       |
| Klang/ Melodie/ gewisse Satzmelodie/ besondere Sprachmelodie/ Sprachmelodie/ melodisch/ Singen/ Sing-Sang | 132       | 107       |
| man hört es                                                                                               | 414       | 70        |
| nu (ja)                                                                                                   | 312       | 58        |
| angenehme Sprechweise/ gemütlich/ gemütliche Art zu sprechen/ niedlich/ vom Klang her sympathisch         | 422       | 45        |
| Stimme langgezogen/ ales langgezogen/ mehren                                                              | 142       | 38        |
| Sing mei Sachse sing.                                                                                     | 313       | 32        |
| abfällige Art zu sprechen/ dreckig/ dreckige Sprache/ sprachfaul/ luschig/ ganz schlimm/ schludern        | 422       | 29        |
| lustige Mundart/ putzig                                                                                   | 422       | 29        |

|                                                                                             |     |    |
|---------------------------------------------------------------------------------------------|-----|----|
| Übergangsgebiet/ Übergänge/ fließende Übergänge/<br>Mischgebiet/ Mischung                   | 442 | 28 |
| unterschiedlich/ in sich verschieden/ relativ vielfältig                                    | 411 | 22 |
| bestimmte Begriffe/ eigene Worte                                                            | 311 | 21 |
| Zischlaute                                                                                  | 121 | 20 |
| Thüringisch                                                                                 | 432 | 19 |
| ü > i                                                                                       | 114 | 16 |
| Sachsen                                                                                     | 441 | 16 |
| südliches Sachsen                                                                           | 442 | 16 |
| Vokale gedehnt/ Vokale langgezogen                                                          | 112 | 14 |
| Betonung/ einzelne Betonung                                                                 | 133 | 14 |
| ha(o) (ja)                                                                                  | 312 | 14 |
| fai [keine weiteren Angaben]                                                                | 312 | 14 |
| ni (nicht)                                                                                  | 321 | 14 |
| au net (auch nicht)                                                                         | 321 | 14 |
| [p, t, k] weich                                                                             | 123 | 13 |
| nu-nu (ja-ja)                                                                               | 312 | 13 |
| ganz schön breit/ breit gezogen/ breite Aussprache                                          | 412 | 13 |
| Erzgebirgisch                                                                               | 432 | 12 |
| sch-Laute                                                                                   | 123 | 11 |
| langsam gesprochen                                                                          | 131 | 11 |
| Laibzsch (Leipzig)                                                                          | 321 | 11 |
| eigene Mundart/ eigenständig/ innerhalb Sachsens aber<br>eigene Mundart/ eigene Sprechweise | 411 | 11 |
| ähnlich dem Sächsischen/ bisschen Sächsisch/ leichtes<br>Sächsisch/ Abart des Sächsischen   | 432 | 11 |
| zwischen Dresden, Leipzig und Chemnitz                                                      | 442 | 11 |
| gä (nicht wahr?)                                                                            | 312 | 10 |
| nee (nein)                                                                                  | 321 | 10 |
| jeloofn                                                                                     | 321 | 10 |
| janz/ jut                                                                                   | 321 | 10 |
| alles weich/ alles weich ausgesprochen                                                      | 412 | 10 |
| ch > sch                                                                                    | 123 | 9  |
| Stimme eher hoch angesetzt                                                                  | 132 | 9  |
| rundes Reden                                                                                | 412 | 9  |
| richtig schönes Sächsisch                                                                   | 422 | 9  |
| grammatische Wendungen                                                                      | 210 | 8  |
| Wir gehen beim Doktor.                                                                      | 230 | 8  |
| nor (ja)                                                                                    | 312 | 8  |
| Birne (Pirna)                                                                               | 321 | 8  |
| Thüringen                                                                                   | 441 | 8  |
| bestimmte Laute/ bestimmte Wortlaute (z.B. Márcel)                                          | 111 | 7  |
| rollendes R                                                                                 | 123 | 7  |
| fast Hochdeutsch/ Durchmischung mit Hochdeutsch/ etwas<br>ohne Akzent/ relativ Hochdeutsch  | 431 | 7  |
| etwas anders als Thüringisch                                                                | 432 | 7  |
| Vogtländisch                                                                                | 432 | 7  |
| [e] auseinandergezogen                                                                      | 114 | 6  |
| k > g                                                                                       | 123 | 6  |
| weit hinten gesprochen                                                                      | 142 | 6  |
| reden mit Zwerchfell                                                                        | 142 | 6  |
| guddi (gut)                                                                                 | 321 | 6  |
| wie so Art Sprechgesang                                                                     | 411 | 6  |
| nicht so stark ausgeprägt                                                                   | 431 | 6  |

|                                                              |     |   |
|--------------------------------------------------------------|-----|---|
| Brandenburgisch                                              | 432 | 6 |
| preußisch                                                    | 432 | 6 |
| Mischmasch von Thüringisch und Sächsisch                     | 432 | 6 |
| Leipziger Ecke/ alles um Leipzig                             | 441 | 6 |
| Arzjebirgler/ Arzjebirsch                                    | 321 | 5 |
| och (auch)                                                   | 321 | 5 |
| isch                                                         | 321 | 5 |
| fuffzsch (50)                                                | 321 | 5 |
| vertraut                                                     | 412 | 5 |
| Thüringisch-Bayerisch                                        | 432 | 5 |
| oi > ai                                                      | 114 | 4 |
| betonte Endungen wenn sie auf Vokale enden                   | 133 | 4 |
| gälle (nicht wahr?)                                          | 312 | 4 |
| üsch (ich)                                                   | 321 | 4 |
| mir (wir)                                                    | 321 | 4 |
| meener                                                       | 321 | 4 |
| bisschen Anhaltinisch                                        | 432 | 4 |
| zwischen Südsächsisch und Thüringisch                        | 432 | 4 |
| Frankenwald                                                  | 441 | 4 |
| au > o                                                       | 114 | 3 |
| g > j                                                        | 123 | 3 |
| schwer verständlich/ genuschelt                              | 142 | 3 |
| grammatische Fehler                                          | 210 | 3 |
| 3./4. Fall vertauschen                                       | 230 | 3 |
| mit die Fahrräder                                            | 230 | 3 |
| dir/dich verwechseln                                         | 230 | 3 |
| Gänsefleisch mal den Gofferraum aufmachen?                   | 313 | 3 |
| Holzmichel                                                   | 313 | 3 |
| Maschendrahtzaun                                             | 313 | 3 |
| bekannter Dialekt                                            | 411 | 3 |
| legér                                                        | 412 | 3 |
| klassisch Ostdeutsch                                         | 413 | 3 |
| Berlinisch                                                   | 432 | 3 |
| Großstadtsächsisch                                           | 432 | 3 |
| Mischung aus Sächsisch und Anhaltinisch                      | 432 | 3 |
| Sächsisch mit Einflüssen des Hochdeutschen                   | 432 | 3 |
| Erzgebirge                                                   | 441 | 3 |
| Dresdner Ecke                                                | 441 | 3 |
| zwischen Sächsisch und Bayerisch-Vogtländisch                | 442 | 3 |
| zwischen Thüringen und Oberlausitz                           | 442 | 3 |
| Zwischending zwischen Leipzig und Meißen                     | 442 | 3 |
| e > a                                                        | 114 | 2 |
| [e] betont                                                   | 114 | 2 |
| keine Unterscheidung zwischen harten und weichen Konsonanten | 121 | 2 |
| zusammengezogen                                              | 142 | 2 |
| Endungen anders                                              | 220 | 2 |
| -l angehängt                                                 | 220 | 2 |
| bestimmte Anhängsel                                          | 220 | 2 |
| Ant (Ente)                                                   | 312 | 2 |
| no-no (ja-ja)                                                | 312 | 2 |
| kofen                                                        | 321 | 2 |
| gung (Junge)                                                 | 321 | 2 |

|                                                |     |      |
|------------------------------------------------|-----|------|
| heem (zu Hause)                                | 321 | 2    |
| kein richtiger Dialekt/ kein eigener Dialekt   | 411 | 2    |
| Sorben mit dabei                               | 415 | 2    |
| nicht Lieblingssächsisch                       | 421 | 2    |
| geht ins Bayerische                            | 432 | 2    |
| Lausitzer Roller                               | 432 | 2    |
| Provinzsächsisch                               | 432 | 2    |
| Sorbisch/ Slawisch                             | 432 | 2    |
| Lausitz                                        | 441 | 2    |
| Übergang Thüringen, Sachsen und Sachsen-Anhalt | 442 | 2    |
| ziehen das [i] lang                            | 114 | 1    |
| [o] betont schlofen                            | 114 | 1    |
| a > u                                          | 114 | 1    |
| o > u                                          | 114 | 1    |
| weiche Laute                                   | 121 | 1    |
| kein klares Bayerisch                          | 142 | 1    |
| bekannte Lieder                                | 313 | 1    |
| Öpfel (Äpfel)                                  | 321 | 1    |
| ken                                            | 321 | 1    |
| kein eindeutiger Dialekt                       | 411 | 1    |
| Verständigungsprobleme                         | 411 | 1    |
| für andere Leute klingt es Sächsisch           | 411 | 1    |
| dunkle Sprache                                 | 412 | 1    |
| wie eine Bekannte aus Chemnitz                 | 414 | 1    |
| anders                                         | 414 | 1    |
| negativer Touch                                | 422 | 1    |
| Nordbrandenburgisch                            | 432 | 1    |
| Südbrandenburgisch                             | 432 | 1    |
| Chemnitzerisch                                 | 432 | 1    |
| nicht mehr ganz Erzgebirgisch                  | 432 | 1    |
| Einflüsse von Hallenser                        | 432 | 1    |
| teilweise Einfluss von norddeutschem Platt     | 432 | 1    |
| Mischung aus Berlinern und Sächseln            | 432 | 1    |
| vielleicht Sorbisch                            | 432 | 1    |
| Sachsen-Anhalt                                 | 441 | 1    |
| nördlich von Leipzig                           | 442 | 1    |
| zwischen Sächsisch, Bayerisch und Thüringisch  | 442 | 1    |
|                                                |     |      |
| Gesamtpunktwert                                |     | 1323 |

Tabelle 96: Die assoziierten Einzelmerkmale der Nordgruppe im Cluster 1

| Beschreibung                                                                                                                                                                          | Subgruppe | Punktwert |
|---------------------------------------------------------------------------------------------------------------------------------------------------------------------------------------|-----------|-----------|
| Anhaltinisch/ Sachsenanhaltinisch                                                                                                                                                     | 432       | 60        |
| Hallisch                                                                                                                                                                              | 432       | 57        |
| Klang der Stimme/ melodisch/ unterschiedlicher Klang/<br>Sprachmelodie geht nach unten/ Stimme tief/ singender<br>Klang/ Sing-Sang/ das Singen ist Sächsisch und sonst was<br>eigenes | 132       | 45        |
| g > j                                                                                                                                                                                 | 123       | 40        |
| abfällige Art zu sprechen/ dreckig/ dreckige Aussprache/<br>klingt dreckig/ faul/ sprachfaul/ klingt nicht so gut/<br>luschig/ schlimm                                                | 422       | 40        |
| jeht/ jut (geht/ gut)                                                                                                                                                                 | 321       | 32        |
| Sächsisch                                                                                                                                                                             | 432       | 30        |
| nee (nein)                                                                                                                                                                            | 321       | 29        |
| fast Hochdeutsch/ Hochdeutsch/ fast Hochdeutsch außer<br>ein paar Wörter/ sauberstes Deutsch der Gegend                                                                               | 431       | 29        |
| Grenzregion/ fließende Übergänge/ Mischformen/<br>mehrere Einflüsse                                                                                                                   | 442       | 28        |
| och (auch)                                                                                                                                                                            | 321       | 27        |
| man erkennt es                                                                                                                                                                        | 414       | 27        |
| Berlinisch/ bisschen Berlinerisch                                                                                                                                                     | 432       | 24        |
| typische Wörter/ eigene Begriffe                                                                                                                                                      | 311       | 23        |
| Anhalt/ Sachsen-Anhalt/ Sachsen-Anhaltinische Provinz                                                                                                                                 | 441       | 23        |
| so wie ich/ Heimat                                                                                                                                                                    | 414       | 21        |
| gemütliche Art zu sprechen                                                                                                                                                            | 422       | 19        |
| na (ja)                                                                                                                                                                               | 312       | 17        |
| ken/ kene (kein/ keine)                                                                                                                                                               | 321       | 15        |
| sehr unsauber/ bisschen unsauber                                                                                                                                                      | 412       | 15        |
| alles langgezogen/ Worte werden gezogen/ mehren                                                                                                                                       | 142       | 13        |
| ähnlich Sächsisch/ sächsischer Einschlag                                                                                                                                              | 432       | 13        |
| Mischung aus Sächsisch und Anhaltinisch                                                                                                                                               | 432       | 13        |
| stimmloses [e]                                                                                                                                                                        | 114       | 11        |
| k > g                                                                                                                                                                                 | 123       | 11        |
| bequeme Sprechweise                                                                                                                                                                   | 142       | 11        |
| grammatische Fehler/ Grammatik schlecht                                                                                                                                               | 210       | 11        |
| kofen (kaufen)                                                                                                                                                                        | 321       | 11        |
| heem (zu Hause)                                                                                                                                                                       | 321       | 11        |
| lange Laute                                                                                                                                                                           | 111       | 10        |
| Weichmachen von harten Buchstaben                                                                                                                                                     | 121       | 10        |
| [g, k] anders                                                                                                                                                                         | 123       | 10        |
| smeiumt (es regnet)                                                                                                                                                                   | 312       | 10        |
| Scheijks (abfällig für junger Mann)                                                                                                                                                   | 312       | 10        |
| Ische (abfällig für junge Frau)                                                                                                                                                       | 312       | 10        |
| Preußisch                                                                                                                                                                             | 432       | 10        |
| Mischmasch von Thüringisch und Sächsisch                                                                                                                                              | 432       | 10        |
| kein richtiger Dialekt                                                                                                                                                                | 411       | 8         |
| für andere Leute klingt es Sächsisch                                                                                                                                                  | 411       | 8         |
| negativer Touch                                                                                                                                                                       | 422       | 8         |
| leichter Akzent/ nicht so stark ausgeprägt                                                                                                                                            | 431       | 8         |

|                                                    |     |   |
|----------------------------------------------------|-----|---|
| au > o                                             | 114 | 7 |
| unsaubere Aussprache/ genuschelt                   | 142 | 7 |
| 3./4. Fall vertauschen                             | 230 | 7 |
| mit die Fahrräder                                  | 230 | 7 |
| mir/mich verwechseln                               | 230 | 7 |
| dir/dich verwechseln                               | 230 | 7 |
| legér                                              | 412 | 7 |
| a > a(o)                                           | 114 | 6 |
| kein eindeutiger Dialekt                           | 411 | 6 |
| J-Sager                                            | 415 | 6 |
| teilweise Einfluss vom norddeutschen Platt         | 432 | 6 |
| Mischung Berlinern und Sächsisch                   | 432 | 6 |
| Umkreis Halle                                      | 441 | 6 |
| bestimmte Aussprache von [a] und [o]               | 142 | 5 |
| bei mich                                           | 230 | 5 |
| miche (mir & mich)                                 | 230 | 5 |
| wa (nicht wahr?)                                   | 312 | 5 |
| ene (eine)                                         | 321 | 5 |
| lofen (laufen)                                     | 321 | 5 |
| matschig                                           | 412 | 5 |
| wie Kaugummi                                       | 414 | 5 |
| Brandenburgisch                                    | 432 | 5 |
| geht ins Brandenbrugisch-Berlinische               | 432 | 5 |
| Thüringisch                                        | 432 | 5 |
| nasaler Ton                                        | 132 | 4 |
| Wörter verunglimpfen                               | 142 | 4 |
| Wörter deutlicher                                  | 142 | 4 |
| sprechen klarer als in Halle                       | 142 | 4 |
| anderschter                                        | 230 | 4 |
| "Alter" an Sätze rangehängt                        | 312 | 4 |
| ouch                                               | 321 | 4 |
| kommse (kommen sie)                                | 321 | 4 |
| kum ma riwwer (komm mal rüber)                     | 321 | 4 |
| joddeln                                            | 411 | 4 |
| nicht so gezogen wie Sächsisch                     | 412 | 4 |
| schichtspezifisch                                  | 414 | 4 |
| Provinzbevölkerung                                 | 415 | 4 |
| Stadt-Land-Unterschied                             | 431 | 4 |
| Richtung Berlin                                    | 441 | 4 |
| verzerren Sprache                                  | 142 | 3 |
| dunkler                                            | 412 | 3 |
| wie Magdeburger                                    | 414 | 3 |
| Mischung Sächsisch und Preußisch                   | 432 | 3 |
| Sächsisch mit hochdeutschen Einflüssen             | 432 | 3 |
| Thüringen                                          | 441 | 3 |
| zwischen Anhaltinisch, Sächsisch und Thüringisch   | 442 | 3 |
| Grenze zwischen Thüringen und Sachsen              | 442 | 3 |
| Übergang von Thüringen, Sachsen und Sachsen-Anhalt | 442 | 3 |
| Zischlaute                                         | 121 | 2 |
| eigene Formen                                      | 220 | 2 |
| bestimmte Anhängsel                                | 220 | 2 |
| mein/dein verwechseln                              | 230 | 2 |
| einholen (einkaufen)                               | 312 | 2 |

|                                                                      |     |      |
|----------------------------------------------------------------------|-----|------|
| gä (nicht wahr?)                                                     | 312 | 2    |
| jetze (jetzt)                                                        | 321 | 2    |
| Olter (Alter)                                                        | 321 | 2    |
| anders als in Leipzig                                                | 411 | 2    |
| eigene Mundart                                                       | 411 | 2    |
| Provinz                                                              | 411 | 2    |
| Sorben mit dabei                                                     | 415 | 2    |
| Sachsen                                                              | 441 | 2    |
| Lausitz                                                              | 441 | 2    |
| alles um Leipzig                                                     | 441 | 2    |
| Magdeburger Ecke                                                     | 441 | 2    |
| zwischen Leipzig und Meißen                                          | 442 | 2    |
| regionale Nähe der Städte                                            | 442 | 2    |
| [e] auseinandergezogen                                               | 114 | 1    |
| ü > i                                                                | 114 | 1    |
| ai > e                                                               | 114 | 1    |
| betonte Endungen wenn sie auf Vokale enden                           | 133 | 1    |
| [e] angehängt                                                        | 220 | 1    |
| Worte und Silben werden in Sätzen weggelassen (hast, kannst, willst) | 220 | 1    |
| Knatz (der Kleine)                                                   | 312 | 1    |
| Laibzsch (Leipzig)                                                   | 321 | 1    |
| dette (das dort)                                                     | 321 | 1    |
| Muttije                                                              | 321 | 1    |
| icke                                                                 | 321 | 1    |
| fuffzsch (50)                                                        | 321 | 1    |
| närcheln (nörgeln)                                                   | 321 | 1    |
| relativ weich                                                        | 412 | 1    |
| rundes Reden                                                         | 412 | 1    |
| traditionell                                                         | 413 | 1    |
| kein eigener Dialekt                                                 | 431 | 1    |
| Vorstadium Bayerisch                                                 | 432 | 1    |
| Richtung Leipzigerisch                                               | 432 | 1    |
| ähnlich wie Wittenberg                                               | 432 | 1    |
| nördlich von Leipzig                                                 | 442 | 1    |
| zwisch Thüringen und Oberlausitz                                     | 442 | 1    |
| Grenze zum Sächsischen                                               | 442 | 1    |
| Mischung Anhalt, Sachsen und Brandenburg                             | 442 | 1    |
|                                                                      |     |      |
| Gesamtpunktwert                                                      |     | 1105 |

Tabelle 97: Die assoziierten Einzelmerkmale der Nordgruppe im Cluster 2



| Beschreibung                              | Subgruppe | Punktwert |
|-------------------------------------------|-----------|-----------|
| Bayerisch                                 | 432       | 10        |
| rollendes R                               | 123       | 5         |
| unverständlich                            | 142       | 4         |
| Fränkisch                                 | 432       | 3         |
| Thüringisch-Bayerisch                     | 432       | 3         |
| Bayern                                    | 441       | 3         |
| recht tiefe Sprache (Frequenz)            | 132       | 2         |
| bestimmte Worte/ eigene Begriffe          | 311       | 2         |
| man hört es/ man erkennt es               | 414       | 2         |
| klingt gemütlich/ wohlgefällig            | 422       | 2         |
| bisschen Hochdeutsch                      | 431       | 2         |
| Oberfranken                               | 441       | 2         |
| mehr Übergänge                            | 442       | 2         |
| viele o-Laute                             | 113       | 1         |
| viele oa-Kombinationen                    | 113       | 1         |
| ich > ach Laut                            | 123       | 1         |
| sprechen sehr langsam                     | 131       | 1         |
| anderer Singsang                          | 132       | 1         |
| gutturale Aussprache                      | 142       | 1         |
| zusammenhängende Worte                    | 220       | 1         |
| Verb und Personalpronomen zusammengezogen | 220       | 1         |
| gälle (nicht wahr?)                       | 312       | 1         |
| gäll (nicht wahr?)                        | 312       | 1         |
| obatschn [keine weiteren Angaben]         | 312       | 1         |
| gä (nicht wahr?)                          | 312       | 1         |
| fast wie Fremdsprache                     | 411       | 1         |
| weich                                     | 412       | 1         |
| traditionell                              | 413       | 1         |
| Wessisprache                              | 413       | 1         |
| lustig                                    | 422       | 1         |
| Oberfränkisch                             | 432       | 1         |
| Thüringisch                               | 432       | 1         |
| Franken                                   | 441       | 1         |
| Frankenwald                               | 441       | 1         |
|                                           |           |           |
| Gesamtpunktwert                           |           | 63        |

Tabelle 98: Die assoziierten Einzelmerkmale der Nordgruppe im Cluster 3

| Beschreibung                                                                                                | Subgruppe | Punktwert |
|-------------------------------------------------------------------------------------------------------------|-----------|-----------|
| Berlinisch/ abgeschwächtes Berlinerisch/ geht ins Berlinische/ knapp vor Berlinerisch/ ähnlich Berlinerisch | 432       | 17        |
| Lausitz/ Lausitzer Gegend                                                                                   | 441       | 9         |
| dreckige Sprache/ sprachfaul                                                                                | 422       | 8         |
| Brandenburgisch                                                                                             | 432       | 8         |
| Sächsisch                                                                                                   | 432       | 8         |
| Sachsen                                                                                                     | 441       | 8         |
| man hört es                                                                                                 | 414       | 7         |
| icke                                                                                                        | 321       | 6         |
| Sorben mit dabei                                                                                            | 415       | 6         |
| fast Hochdeutsch außer ein paar Wörter/ Hochdeutsch/ relativ Hochdeutsch                                    | 431       | 5         |
| Vokale langgezogen                                                                                          | 112       | 4         |
| melodisch/ Singen/ leicht singend                                                                           | 132       | 4         |
| typische Wörter/ typische Redewendungen                                                                     | 311       | 4         |
| nu (ja)                                                                                                     | 312       | 4         |
| Sing mei Sachse sing.                                                                                       | 313       | 4         |
| dette (das dort)                                                                                            | 321       | 4         |
| Südbrandenburgisch                                                                                          | 432       | 4         |
| Mischung aus Sächsisch und Anhaltinisch                                                                     | 432       | 4         |
| vielleicht Sorbisch/ sorbischer Raum                                                                        | 432       | 4         |
| zwischen Dresden, Leipzig und Chemnitz                                                                      | 442       | 4         |
| Mischung aus Anhalt-Sächsisch und Brandenburg                                                               | 442       | 4         |
| [o] Betonung schlofen                                                                                       | 114       | 3         |
| Öpfel (Äpfel)                                                                                               | 321       | 3         |
| schwer                                                                                                      | 412       | 3         |
| kein Hochdeutsch                                                                                            | 431       | 3         |
| kein Berlinerisch                                                                                           | 432       | 3         |
| zwischen Hochdeutsch und Berlinerisch                                                                       | 432       | 3         |
| Nordbrandenburgisch                                                                                         | 432       | 3         |
| kein Sächsisch                                                                                              | 432       | 3         |
| Mischmasch aus Thüringisch und Sächsisch                                                                    | 432       | 3         |
| Sorbisch/ Slawisch                                                                                          | 432       | 3         |
| kein Thüringisch                                                                                            | 432       | 3         |
| Richtung Berlin                                                                                             | 441       | 3         |
| Grenze Tschechien und Polen                                                                                 | 442       | 3         |
| Vokale gedehnt                                                                                              | 112       | 2         |
| [p, t, k] weich                                                                                             | 123       | 2         |
| sch-Laute                                                                                                   | 123       | 2         |
| rollendes R                                                                                                 | 123       | 2         |
| langsam gesprochen                                                                                          | 131       | 2         |
| Betonung anders                                                                                             | 133       | 2         |
| ha(o) (ja)                                                                                                  | 312       | 2         |
| fai [keine weiteren Angaben]                                                                                | 312       | 2         |
| smeiumt (es regnet)                                                                                         | 312       | 2         |
| Scheijks (abfällig für junger Mann)                                                                         | 312       | 2         |
| Ische (abfällig für junge Frau)                                                                             | 312       | 2         |

|                                      |     |     |
|--------------------------------------|-----|-----|
| nee (nein)                           | 321 | 2   |
| guddi (gut)                          | 321 | 2   |
| ken (kein)                           | 321 | 2   |
| au net (auch nicht)                  | 321 | 2   |
| eigenständig/ ganz eigene Verwendung | 411 | 2   |
| härter gesprochen                    | 412 | 2   |
| schneller                            | 412 | 2   |
| Sachsenanhaltinisch                  | 432 | 2   |
| Hallisch                             | 432 | 2   |
| ähnlich Sächsisch                    | 432 | 2   |
| Berlin-Brandenburg                   | 441 | 2   |
| südliches Sachsen                    | 442 | 2   |
| Übergänge                            | 442 | 2   |
| lange Laute                          | 111 | 1   |
| ü > i                                | 114 | 1   |
| au > o                               | 114 | 1   |
| Zischlaute                           | 121 | 1   |
| g > j                                | 123 | 1   |
| [e] betont                           | 133 | 1   |
| mehren                               | 142 | 1   |
| grammatische Fehler                  | 210 | 1   |
| eigene Formen                        | 220 | 1   |
| 3./4. Fall vertauschen               | 230 | 1   |
| mit die Fahrräder                    | 230 | 1   |
| dir/dich verwechseln                 | 230 | 1   |
| no-no (ja-ja)                        | 312 | 1   |
| gä (nicht wahr?)                     | 312 | 1   |
| jetze (jetzt)                        | 321 | 1   |
| och (auch)                           | 321 | 1   |
| kofen (kaufen)                       | 321 | 1   |
| heem (zu Hause)                      | 321 | 1   |
| relativ vielfältig                   | 411 | 1   |
| breite Aussprache                    | 412 | 1   |
| rundes Reden                         | 412 | 1   |
| legér                                | 412 | 1   |
| anders                               | 414 | 1   |
| nicht Lieblingssächsisch             | 421 | 1   |
| lustige Mundart                      | 422 | 1   |
| Lausitzer Roller                     | 432 | 1   |
| Mischung Berlinern und Sächseln      | 432 | 1   |
| Sächsisch-Hochdeutsch                | 432 | 1   |
| Thüringen                            | 441 | 1   |
| nördlich von Leipzig                 | 442 | 1   |
| zwischen Thüringen und Oberlausitz   | 442 | 1   |
|                                      |     |     |
| Gesamtpunktwert                      |     | 244 |

Tabelle 99: Die assoziierten Einzelmerkmale der Nordgruppe im Cluster 4

| Beschreibung                                                                           | Subgruppe | Punktwert |
|----------------------------------------------------------------------------------------|-----------|-----------|
| Sächsisch/ Ursächsisch                                                                 | 432       | 14        |
| Klang der Stimme/ gewisse Satzmelodie/ besondere Sprachmelodie/ Singen/ leicht singend | 132       | 10        |
| fließende Übergänge/ mehr vermischt/ Mischgebiet/ Mischung                             | 442       | 6         |
| abfällige Art zu sprechen/ dreckige Sprache/ sprachfaul/ luschtig/ ganz schlimm        | 422       | 5         |
| Hallisch                                                                               | 432       | 5         |
| janz/ jeht/ jut (ganz/ geht/ gut)                                                      | 321       | 4         |
| angenehme Sprechweise/ gemütlich/ gemütliche Art zu sprechen/ niedlich                 | 422       | 4         |
| Leipziger Ecke                                                                         | 441       | 4         |
| g > j                                                                                  | 123       | 3         |
| nu (ja)                                                                                | 312       | 3         |
| och (auch)                                                                             | 321       | 3         |
| ganz schön breit/ breite Aussprache                                                    | 412       | 3         |
| man hört es                                                                            | 414       | 3         |
| Anhaltinisch/ Sachsenanhaltinisch                                                      | 432       | 3         |
| lange Laute                                                                            | 111       | 2         |
| Vokale gedehnt/ Vokale langgezogen                                                     | 112       | 2         |
| ü > i                                                                                  | 114       | 2         |
| au > o                                                                                 | 114       | 2         |
| Zischlaute                                                                             | 121       | 2         |
| reden mit Zwerchfell                                                                   | 142       | 2         |
| grammatische Fehler                                                                    | 210       | 2         |
| 3./4. Fall vertauschen                                                                 | 230       | 2         |
| mit die Fahrräder                                                                      | 230       | 2         |
| dir/dich verwechseln                                                                   | 230       | 2         |
| typische Wörter                                                                        | 311       | 2         |
| nee (nein)                                                                             | 321       | 2         |
| kofen (kaufen)                                                                         | 321       | 2         |
| fuffzsch (50)                                                                          | 321       | 2         |
| heem (zu Hause)                                                                        | 321       | 2         |
| wie eine Art Sprechgesang                                                              | 411       | 2         |
| legér                                                                                  | 412       | 2         |
| lustige Mundart/ putzig                                                                | 422       | 2         |
| fast Hochdeutsch/ Hochdeutsch                                                          | 431       | 2         |
| nicht so stark ausgeprägt                                                              | 431       | 2         |
| bisschen Berlinerisch/ teilweise Berlinerisch                                          | 432       | 2         |
| Preußisch                                                                              | 432       | 2         |
| ähnlich dem Sächsischen/ bisschen Sächsisch                                            | 432       | 2         |
| Mischung aus Sächsisch und Anhaltinisch                                                | 432       | 2         |
| Mischmasch von Thüringisch-Sächsisch                                                   | 432       | 2         |
| Sachsen-Anhalt/ Sachsen-Anhaltinische Provinz                                          | 441       | 2         |
| nördlich von Leipzig                                                                   | 442       | 2         |
| [e] auseinandergezogen                                                                 | 114       | 1         |
| stimmloses [e]                                                                         | 114       | 1         |
| [p, t, k] weich                                                                        | 123       | 1         |

|                                                |     |     |
|------------------------------------------------|-----|-----|
| ch > sch                                       | 123 | 1   |
| Stimme eher hoch angesetzt                     | 132 | 1   |
| mehren                                         | 142 | 1   |
| grammatische Wendungen                         | 210 | 1   |
| eigene Formen                                  | 220 | 1   |
| Wir gehen beim Doktor.                         | 230 | 1   |
| smeiumt (es regnet)                            | 312 | 1   |
| Scheijks (abfällig für junger Mann)            | 312 | 1   |
| Ische (abfällig für junge Frau)                | 312 | 1   |
| ni (nicht)                                     | 321 | 1   |
| jetze (jetzt)                                  | 321 | 1   |
| ken (kein)                                     | 321 | 1   |
| isch                                           | 321 | 1   |
| jeloofn                                        | 321 | 1   |
| kein richtiger Dialekt                         | 411 | 1   |
| kein eindeutiger Dialekt                       | 411 | 1   |
| in sich verschieden                            | 411 | 1   |
| bekannt                                        | 411 | 1   |
| für andere Leute klingt es Sächsisch           | 411 | 1   |
| alles weich ausgesprochen                      | 412 | 1   |
| Provinzbevölkerung                             | 415 | 1   |
| negativer Touch                                | 422 | 1   |
| bisschen Brandenburgisch                       | 432 | 1   |
| Südbrandenburgisch                             | 432 | 1   |
| teilweise ein Einfluss von norddeutschem Platt | 432 | 1   |
| Mischung aus Berlinern und Sächseln            | 432 | 1   |
| ähnlich wie Sprachweise in Wittenberg          | 432 | 1   |
| Umkreis Halle                                  | 441 | 1   |
| zwischen Leipzig und Meißen                    | 442 | 1   |
| Grenze zum Sächsischen                         | 442 | 1   |
|                                                |     |     |
| Gesamtpunktwert                                |     | 157 |

Tabelle 100: Die assoziierten Einzelmerkmale der Nordgruppe im Cluster 5

| Beschreibung                                        | Subgruppe | Punktwert |
|-----------------------------------------------------|-----------|-----------|
| Thüringisch                                         | 432       | 32        |
| gä (nicht wahr?)                                    | 312       | 11        |
| Thüringen/ Thüringer Raum                           | 441       | 11        |
| Übergangsgebiet/ fließende Übergänge                | 442       | 11        |
| Singen/ Sing-Sang/ ganz schön gesungen              | 132       | 8         |
| man hört es/ erkennt man sofort                     | 414       | 7         |
| Hochdeutsch/ fast Hochdeutsch außer ein paar Wörter | 431       | 7         |
| gälle (nicht wahr?)                                 | 312       | 6         |
| bisschen Bayerisch/ teilweise Bayerisch             | 432       | 6         |
| gäll (nicht wahr?)                                  | 312       | 5         |
| ähnlich wie Sächsisch/ leichtes Sächsisch           | 432       | 5         |
| klingt gemütlich                                    | 422       | 4         |
| Sächsisch                                           | 432       | 4         |
| Aussprache sauberer                                 | 142       | 3         |
| bestimmte Begriffe                                  | 311       | 3         |

|                                                             |     |     |
|-------------------------------------------------------------|-----|-----|
| unterschiedlich                                             | 411 | 3   |
| nicht hell                                                  | 412 | 3   |
| sehr rund                                                   | 412 | 3   |
| nicht so streng                                             | 412 | 3   |
| eigene Sprechweise                                          | 414 | 3   |
| Übergang von Thüringen nach Sachsen-Anhalt                  | 442 | 3   |
| rollendes R                                                 | 123 | 2   |
| kein klares Bayerisch                                       | 142 | 2   |
| besser verständlich                                         | 142 | 2   |
| bestimmte Anhängsel                                         | 220 | 2   |
| Füllwörter                                                  | 311 | 2   |
| nä (nicht wahr?)                                            | 312 | 2   |
| och (auch)                                                  | 321 | 2   |
| eigene Mundart                                              | 411 | 2   |
| dunkle Sprache                                              | 412 | 2   |
| kein eigener Dialekt                                        | 431 | 2   |
| nur kleine Schnitzer                                        | 431 | 2   |
| bisschen Anhaltinisch                                       | 432 | 2   |
| abgeschwächtes Erzgebirgisch/ nicht mehr ganz Erzgebirgisch | 432 | 2   |
| zwischen Thüringisch und Sächsisch                          | 432 | 2   |
| Thüringisch-Bayerisch                                       | 432 | 2   |
| zwischen Sächsisch, Bayerisch und Thüringisch               | 442 | 2   |
| anderes Verzerren der Laute                                 | 111 | 1   |
| i > o                                                       | 114 | 1   |
| betonte Endungen wenn sie auf Vokale enden                  | 133 | 1   |
| klarer                                                      | 142 | 1   |
| alles langgezogen                                           | 142 | 1   |
| no-no (ja-ja)                                               | 312 | 1   |
| bissl (bisschen)                                            | 321 | 1   |
| Brolle (Brille)                                             | 321 | 1   |
| ganz anders als Weimar oder Erfurt                          | 411 | 1   |
| lustige Mundart                                             | 422 | 1   |
| kaum Dialekt                                                | 431 | 1   |
| geht in Richtung Sächsisch von der Art des Singens          | 432 | 1   |
| zwischen Leipzig und Meißen                                 | 442 | 1   |
|                                                             |     |     |
| Gesamtpunktwert                                             |     | 186 |

Tabelle 101: Die assoziierten Einzelmerkmale der Nordgruppe im Cluster 6

| Beschreibung                              | Subgruppe | Punktwert |
|-------------------------------------------|-----------|-----------|
| Bayerisch/ Bayerisches Deutsch            | 432       | 10        |
| rollendes R                               | 123       | 5         |
| unverständlich/ total unverständlich      | 142       | 4         |
| Fränkisch                                 | 432       | 3         |
| Thüringisch-Bayerisch                     | 432       | 3         |
| Bayern                                    | 441       | 3         |
| recht tiefe Sprache (Frequenz)            | 132       | 2         |
| bestimmte Worte/ eigene Begriffe          | 311       | 2         |
| gä (nicht wahr?)                          | 312       | 2         |
| man hört es                               | 414       | 2         |
| klingt gemütlich/ wohlgefällig            | 422       | 2         |
| bisschen Hochdeutsch                      | 431       | 2         |
| Oberfranken                               | 441       | 2         |
| mehr Übergänge                            | 442       | 2         |
| anderes Verzerren der Laute               | 111       | 1         |
| viele o-Laute                             | 113       | 1         |
| viele oa-Kombinationen                    | 113       | 1         |
| i > o                                     | 114       | 1         |
| ich > ach Laut                            | 123       | 1         |
| sprechen sehr langsam                     | 131       | 1         |
| anderer Sing-Sang                         | 132       | 1         |
| gutturale Aussprache                      | 142       | 1         |
| klarer                                    | 142       | 1         |
| zusammenhängende Worte                    | 220       | 1         |
| Verb und Personalpronomen zusammengezogen | 220       | 1         |
| gälle (nicht wahr?)                       | 312       | 1         |
| gäll (nicht wahr?)                        | 312       | 1         |
| ha(o) (ja)                                | 312       | 1         |
| fai [keine weiteren Angaben]              | 312       | 1         |
| obatschn [keine weiteren Angaben]         | 312       | 1         |
| Brolle (Brille)                           | 321       | 1         |
| au net (auch nicht)                       | 321       | 1         |
| fast wie Fremdsprache                     | 411       | 1         |
| weich                                     | 412       | 1         |
| Wessisprache                              | 413       | 1         |
| lustig                                    | 422       | 1         |
| Oberfränkisch                             | 432       | 1         |
| Thüringisch                               | 432       | 1         |
| Sachsen                                   | 441       | 1         |
| Thüringen                                 | 441       | 1         |
| Franken                                   | 441       | 1         |
| Frankenwald                               | 441       | 1         |
|                                           |           |           |
| Gesamtpunktwert                           |           | 72        |

Tabelle 102: Die assoziierten Einzelmerkmale der Nordgruppe im Cluster 7

|             | Meiß. Gr. | Lausitz. Gr. | Osterl. Gr. | Vogt.-Erzg. Gr. | Thür. Gr. | Nordgr.  |
|-------------|-----------|--------------|-------------|-----------------|-----------|----------|
| SPR 1       | 321 (16)  | 321 (16)     | 321 (13)    | 321 (23)        | 321 (22)  | 321 (21) |
| (Ost-)Meiß. | 414 (7)   | 142 (7)      | 132 (12)    | 132 (7)         | 142 (5)   | 142 (8)  |
|             | 142 (5)   | 414 (5)      | 142 (9)     | 142 (4)         | 414 (4)   | 114 (3)  |
|             | 121 (2)   | 412 (4)      | 414 (4)     | 123 (2)         | 411 (2)   | 414 (3)  |
|             | 132 (2)   | 122 (3)      | 412 (3)     | 411 (2)         | 114       | 122 (2)  |
|             | 412 (2)   | 132 (2)      | 122 (2)     | 422 (2)         | 122       | 121      |
|             | 111       | 121          | 123         | 114             | 123       | 133      |
|             | 114       | 131          | 114         | 122             | 132       | 141      |
|             | 131       | 411          | 411         | 141             | 133       | 220      |
|             | 133       | 220          | 432         | 311             | 422       | 311      |
|             | 421       | 422          |             |                 |           | 412      |
|             | 422       |              |             |                 |           |          |
|             | 432       |              |             |                 |           |          |
| SPR 2       | 321 (31)  | 321 (26)     | 321 (18)    | 321 (21)        | 321 (12)  | 321 (14) |
| Osterl.     | 412 (5)   | 412 (4)      | 132 (7)     | 132 (3)         | 414 (4)   | 142 (6)  |
|             | 142 (4)   | 142 (3)      | 142 (6)     | 142 (3)         | 112 (3)   | 114 (5)  |
|             | 422 (3)   | 414 (3)      | 412 (6)     | 220 (3)         | 132 (3)   | 122 (3)  |
|             | 122       | 114 (2)      | 414 (6)     | 412 (3)         | 142 (3)   | 220 (2)  |
|             | 132       | 123 (2)      | 220 (3)     | 422 (2)         | 412 (3)   | 111 (2)  |
|             | 141       | 112          | 112 (2)     | 112             | 411 (2)   | 132 (2)  |
|             | 220       | 121          | 114 (2)     | 122             | 442 (2)   | 414 (2)  |
|             | 442       | 133          | 123 (2)     | 123             | 114       | 112      |
|             | 414       | 412          | 412 (2)     |                 | 121       | 121      |
|             |           | 142          | 111         |                 | 122       | 133      |
|             |           | 220          | 122         |                 | 220       | 321      |
|             |           | 411          | 210         |                 | 422       | 431      |
|             |           | 422          | 311         |                 | 432       |          |
|             |           |              | 413         |                 |           |          |
|             |           |              | 442         |                 |           |          |
| SPR 3       | 321 (10)  | 321 (16)     | 123 (15)    | 123 (11)        | 321 (12)  | 321 (13) |
| Nordosterl. | 123 (8)   | 411 (7)      | 321 (12)    | 321 (10)        | 123 (7)   | 123 (12) |
|             | 142 (5)   | 121 (4)      | 132 (6)     | 142 (4)         | 412 (4)   | 414 (5)  |
|             | 412 (4)   | 123 (3)      | 142 (3)     | 132 (3)         | 122 (3)   | 142 (4)  |
|             | 132 (4)   | 142 (3)      | 122 (2)     | 412 (2)         | 142 (3)   | 132 (3)  |
|             | 114       | 132 (2)      | 133         | 123             | 132 (2)   | 311 (2)  |
|             | 122       | 220 (2)      | 414         | 414             | 133 (2)   | 114      |
|             | 133       | 114          | 431         | 421             | 411 (2)   | 122      |
|             | 133       | 412          | 442         | 431             | 414       | 141      |
|             | 411       | 413          |             |                 | 112       | 411      |
|             | 414       | 421          |             |                 | 210       |          |



|                       |                                                                                                                                      |                                                                                                                              |                                                                                                                                                                      |                                                                                                                      |                                                                                                                                                      |                                                                                                                                                                                 |
|-----------------------|--------------------------------------------------------------------------------------------------------------------------------------|------------------------------------------------------------------------------------------------------------------------------|----------------------------------------------------------------------------------------------------------------------------------------------------------------------|----------------------------------------------------------------------------------------------------------------------|------------------------------------------------------------------------------------------------------------------------------------------------------|---------------------------------------------------------------------------------------------------------------------------------------------------------------------------------|
|                       | 432<br>442                                                                                                                           | 422<br>431<br>432<br>441                                                                                                     |                                                                                                                                                                      |                                                                                                                      |                                                                                                                                                      |                                                                                                                                                                                 |
| SPR 4<br>Oberlaus.    | 123 (26)<br>321 (10)<br>415 (4)<br>422 (3)<br>121 (2)<br>132 (2)<br>142 (2)<br>220 (2)<br>411 (2)<br>112<br>114<br>122<br>414<br>432 | 123 (26)<br>321 (12)<br>142 (2)<br>220 (2)<br>414 (2)<br>415 (2)<br>311<br>422<br>441                                        | 123 (21)<br>415 (5)<br>220 (4)<br>114 (3)<br>122 (3)<br>321 (3)<br>422 (3)<br>132 (2)<br>141(2)<br>142 (2)<br>442 (2)<br>411<br>432<br>441                           | 123 (23)<br>321 (6)<br>142 (4)<br>122 (3)<br>415 (3)<br>114<br>121<br>132<br>220<br>411<br>412<br>414<br>422         | 123 (18)<br>321 (8)<br>142 (6)<br>122 (5)<br>132 (3)<br>411 (3)<br>414 (3)<br>415 (3)<br>442 (3)<br>220 (2)<br>311 (2)<br>422 (2)                    | 123 (18)<br>321 (13)<br>415 (4)<br>422 (4)<br>122 (3)<br>220 (3)<br>412 (2)<br>121<br>133<br>142<br>311<br>411<br>413<br>414<br>431                                             |
| SPR 5<br>Voerertzg.   | 321 (11)<br>414 (3)<br>422 (3)<br>114 (2)<br>132 (2)<br>412 (2)<br>441 (2)<br>133<br>142<br>411<br>432<br>432. 321. 114              | 321 (10)<br>142 (8)<br>414 (4)<br>432 (4)<br>411 (3)<br>132 (3)<br>123 (2)<br>412 (2)<br>422 (2)<br>111<br>114<br>133<br>441 | 321 (15)<br>432 (7)<br>132 (5)<br>142 (5)<br>412 (4)<br>114 (3)<br>122 (3)<br>411 (3)<br>123 (2)<br>441 (2)<br>442 (2)<br>422 (2)<br>111<br>112<br>131<br>220<br>414 | 321 (12)<br>132 (8)<br>112 (3)<br>412 (3)<br>432 (3)<br>142 (2)<br>411 (2)<br>111<br>114<br>133<br>220<br>414<br>441 | 321 (12)<br>411 (6)<br>123 (5)<br>142 (3)<br>441 (3)<br>132 (2)<br>220 (2)<br>412 (2)<br>114<br>122<br>133<br>321<br>414<br>421<br>431<br>432<br>240 | 321 (16)<br>122 (5)<br>114 (5)<br>112 (4)<br>132 (3)<br>121 (3)<br>111 (2)<br>141 (2)<br>142 (2)<br>411 (2)<br>412 (2)<br>414 (2)<br>441 (2)<br>133<br>415<br>431<br>432<br>442 |
| SPR 6<br>(West-)Erzg. | 321 (49)<br>220 (6)<br>142 (3)<br>311 (2)                                                                                            | 321 (31)<br>220 (5)<br>114 (3)<br>132 (3)                                                                                    | 321 (36)<br>132 (9)<br>142 (8)<br>220 (7)                                                                                                                            | 321 (49)<br>132 (6)<br>114 (3)<br>142 (3)                                                                            | 321 (38)<br>112 (3)<br>142 (3)<br>132 (2)                                                                                                            | 321 (24)<br>122 (5)<br>220 (5)<br>114 (3)                                                                                                                                       |

|           |          |          |          |          |          |          |
|-----------|----------|----------|----------|----------|----------|----------|
|           | 114      | 414 (3)  | 422 (4)  | 415 (3)  | 220 (2)  | 142 (3)  |
|           | 133      | 142 (2)  | 114 (3)  | 111 (2)  | 414 (2)  | 312 (2)  |
|           | 414      | 312 (2)  | 411 (3)  | 133 (2)  | 422 (2)  | 415 (2)  |
|           | 415      | 413      | 111 (2)  | 123      | 442 (2)  | 112      |
|           | 442      | 413      | 415 (2)  | 220      | 133      | 133      |
|           | 312      | 415      | 112      | 312      | 311      | 141      |
|           |          | 415      | 133      | 411      |          | 311      |
|           |          | 422      | 312      |          |          | 422      |
|           |          |          | 413      |          |          | 431      |
|           |          |          | 414      |          |          | 321, 312 |
|           |          |          | 431      |          |          |          |
|           |          |          | 442      |          |          |          |
| SPR 7     | 321 (26) | 321 (22) | 321 (23) | 321 (27) | 321 (26) | 321 (24) |
| Vogtl.    | 123 (6)  | 114 (4)  | 132 (6)  | 132 (5)  | 414 (5)  | 312 (7)  |
|           | 132 (6)  | 414 (4)  | 411 (4)  | 142 (5)  | 142 (4)  | 114 (6)  |
|           | 220 (4)  | 112 (3)  | 220 (3)  | 133 (2)  | 123 (3)  | 123 (5)  |
|           | 411 (4)  | 142 (3)  | 412 (3)  | 220 (2)  | 132 (3)  | 122 (4)  |
|           | 412 (3)  | 411 (3)  | 414 (2)  | 312 (2)  | 412 (3)  | 132 (4)  |
|           | 432 (3)  | 412 (3)  | 422 (2)  | 412 (2)  | 114 (2)  | 142 (4)  |
|           | 142 (2)  | 132 (2)  | 432      | 112      | 411 (2)  | 411 (2)  |
|           | 442 (2)  | 220 (2)  | 121      | 114      | 122 (2)  | 133      |
|           | 121      | 312 (2)  | 122      | 123      | 210      | 415      |
|           | 133      | 432 (2)  | 123      | 311      | 311      | 422      |
|           | 141      | 111      | 133      | 411      | 422      |          |
|           | 415      | 123      | 142      | 414      | 432      |          |
|           |          | 431      | 312      | 415      | 441      |          |
|           |          | 312      |          |          | 312      |          |
| SPR 8     | 321 (27) | 321 (30) | 321 (26) | 321 (27) | 321 (34) | 321 (29) |
| Nordbair. | 220 (5)  | 142 (5)  | 132 (3)  | 220 (3)  | 142 (4)  | 142 (7)  |
|           | 142 (3)  | 114 (3)  | 142 (2)  | 142 (2)  | 220 (4)  | 220 (6)  |
|           | 230 (2)  | 220 (2)  | 220 (2)  | 112      | 112 (2)  | 414 (2)  |
|           | 422 (2)  | 411 (2)  | 411 (2)  | 122      | 422 (2)  | 112      |
|           | 112      | 414 (2)  | 414 (2)  | 132      | 111      | 141      |
|           | 123      | 442 (2)  | 114      | 133      | 132      | 411      |
|           | 311      | 123      | 121      | 141      | 311      | 421      |
|           | 442      | 132      | 431      | 411      | 414      | 442      |
|           |          | 311      | 441      | 431      | 442      |          |
|           |          | 412      |          |          | 141      |          |

Tabelle 103: Benennungshäufigkeiten der perzipierten Merkmale (sortiert nach Merkmalsgruppen)

| SPR 1 (Ostmeiß.)    |            |               |              |                     |            |           |                      |       |
|---------------------|------------|---------------|--------------|---------------------|------------|-----------|----------------------|-------|
|                     | Meiß. Raum | Lausitz. Raum | Osterl. Raum | Vogtl.-Erzgeb. Raum | Thür. Raum | Nordraum  | Sonst. <sup>24</sup> | k. A. |
| Meiß. Gr.           | 16         | 1             | 3            | 2                   | 0          | 1         | 2                    | 5     |
| Lausitz. Gr.        | 6          | 13            | 2            | 0                   | 0          | 0         | 7                    | 2     |
| Osterl. Gr.         | 7          | 0             | 13           | 0                   | 1          | 3         | 3                    | 3     |
| Vogtl.-Erzgeb. Gr.  | 6          | 0             | 3            | 11                  | 0          | 0         | 5                    | 5     |
| Thür. Gr.           | 4          | 0             | 0            | 2                   | 16         | 0         | 3                    | 5     |
| Nordgr.             | 4          | 0             | 1            | 2                   | 3          | 12        | 7                    | 1     |
| Summe               | <b>43</b>  | 14            | 22           | 17                  | 20         | 16        | 27                   | 21    |
| SPR 2 (Osterl.)     |            |               |              |                     |            |           |                      |       |
|                     | Meiß. Raum | Lausitz. Raum | Osterl. Raum | Vogtl.-Erzgeb. Raum | Thür. Raum | Nordraum  | Sonst.               | k. A. |
| Meiß. Gr.           | 18         | 1             | 7            | 0                   | 0          | 0         | 3                    | 1     |
| Lausitz. Gr.        | 8          | 9             | 3            | 1                   | 0          | 1         | 4                    | 4     |
| Osterl. Gr.         | 1          | 0             | 23           | 0                   | 0          | 0         | 6                    | 0     |
| Vogtl.-Erzgeb. Gr.  | 4          | 0             | 7            | 7                   | 3          | 0         | 5                    | 4     |
| Thür. Gr.           | 2          | 0             | 1            | 0                   | 17         | 0         | 7                    | 3     |
| Nordgr.             | 5          | 0             | 7            | 0                   | 2          | 9         | 7                    | 0     |
| Summe               | 38         | 10            | <b>48</b>    | 8                   | 22         | 10        | 32                   | 12    |
| SPR 3 (Nordosterl.) |            |               |              |                     |            |           |                      |       |
|                     | Meiß. Raum | Lausitz. Raum | Osterl. Raum | Vogtl.-Erzgeb. Raum | Thür. Raum | Nordraum  | Sonst.               | k. A. |
| Meiß. Gr.           | 4          | 3             | 0            | 0                   | 2          | 14        | 7                    | 0     |
| Lausitz. Gr.        | 1          | 15            | 1            | 0                   | 0          | 8         | 4                    | 1     |
| Osterl. Gr.         | 1          | 2             | 2            | 0                   | 1          | 19        | 5                    | 0     |
| Vogtl.-Erzgeb. Gr.  | 1          | 2             | 1            | 6                   | 2          | 7         | 11                   | 0     |
| Thür. Gr.           | 0          | 1             | 0            | 0                   | 11         | 13        | 4                    | 1     |
| Nordgr.             | 0          | 0             | 1            | 0                   | 0          | 29        | 0                    | 0     |
| Summe               | 7          | 23            | 5            | 6                   | 16         | <b>90</b> | 31                   | 2     |
| SPR 4 (Oberlaus.)   |            |               |              |                     |            |           |                      |       |
|                     | Meiß. Raum | Lausitz. Raum | Osterl. Raum | Vogtl.-Erzgeb. Raum | Thür. Raum | Nordraum  | Sonst.               | k. A. |
| Meiß. Gr.           | 0          | 25            | 0            | 1                   | 0          | 0         | 0                    | 4     |
| Lausitz. Gr.        | 0          | 25            | 0            | 1                   | 0          | 0         | 2                    | 2     |
| Osterl. Gr.         | 0          | 15            | 0            | 7                   | 0          | 0         | 3                    | 5     |
| Vogtl.-Erzgeb. Gr.  | 1          | 15            | 0            | 1                   | 2          | 0         | 2                    | 9     |
| Thür. Gr.           | 0          | 7             | 0            | 5                   | 1          | 0         | 12                   | 5     |
| Nordgr.             | 0          | 7             | 0            | 5                   | 5          | 0         | 7                    | 6     |
| Summe               | 1          | <b>94</b>     | 0            | 20                  | 8          | 0         | 26                   | 31    |
| SPR 5 (Vorerzgeb.)  |            |               |              |                     |            |           |                      |       |
|                     | Meiß.      | Lausitz.      | Osterl.      | Vogtl.-             | Thür.      | Nord-     | Sonst.               | k. A. |

<sup>24</sup> In diese Rubrik fallen die Zuordnungen außerhalb der sechs relevanten Subregionen, z.B. die Zuordnung *Sächsisch*, *Bairisch*, *Schwäbisch*, *Fränkisch*, *Brandenburgisch*, *Hochdeutsch* und andere Dialektkonzepte sowie die Einordnung der Sprechprobe in eine Übergangsregion, z.B. *Sächsisch-Thüringisch*, da nur bei den eindeutig benannten und für diese Untersuchung relevanten Subregionen weitgehend sichergestellt werden kann, dass die Befragten hier auf gleiche Konzepte referieren.

|                     |            |               |              |                     |            |          |        |       |
|---------------------|------------|---------------|--------------|---------------------|------------|----------|--------|-------|
|                     | Raum       | Raum          | Raum         | Erzgeb. Raum        | Raum       | raum     |        |       |
| Meiß. Gr.           | 11         | 2             | 2            | 9                   | 0          | 0        | 1      | 5     |
| Lausitz. Gr.        | 5          | 7             | 1            | 5                   | 1          | 0        | 6      | 5     |
| Osterl. Gr.         | 3          | 0             | 10           | 5                   | 1          | 0        | 9      | 2     |
| Vogtl.-Erzgeb. Gr.  | 1          | 0             | 0            | 19                  | 1          | 0        | 5      | 4     |
| Thür. Gr.           | 0          | 0             | 0            | 6                   | 17         | 1        | 3      | 3     |
| Nordgr.             | 5          | 1             | 2            | 5                   | 0          | 7        | 9      | 1     |
|                     |            |               |              |                     |            |          |        |       |
| Summe               | 25         | 10            | 15           | <b>49</b>           | 20         | 8        | 33     | 20    |
| SPR 6 (Westerzgeb.) |            |               |              |                     |            |          |        |       |
|                     | Meiß. Raum | Lausitz. Raum | Osterl. Raum | Vogtl.-Erzgeb. Raum | Thür. Raum | Nordraum | Sonst. | k. A. |
| Meiß. Gr.           | 0          | 0             | 0            | 26                  | 0          | 0        | 3      | 1     |
| Lausitz. Gr.        | 1          | 1             | 2            | 21                  | 1          | 0        | 3      | 1     |
| Osterl. Gr.         | 0          | 1             | 0            | 23                  | 1          | 0        | 5      | 0     |
| Vogtl.-Erzgeb. Gr.  | 0          | 0             | 0            | 27                  | 0          | 0        | 2      | 1     |
| Thür. Gr.           | 0          | 0             | 0            | 16                  | 1          | 1        | 7      | 5     |
| Nordgr.             | 2          | 0             | 1            | 14                  | 4          | 0        | 8      | 1     |
|                     |            |               |              |                     |            |          |        |       |
| Summe               | 3          | 2             | 3            | <b>127</b>          | 7          | 1        | 28     | 9     |
| SPR 7 (Vogtl.)      |            |               |              |                     |            |          |        |       |
|                     | Meiß. Raum | Lausitz. Raum | Osterl. Raum | Vogtl.-Erzgeb. Raum | Thür. Raum | Nordraum | Sonst. | k. A. |
| Meiß. Gr.           | 1          | 0             | 1            | 21                  | 4          | 0        | 3      | 0     |
| Lausitz. Gr.        | 3          | 1             | 1            | 10                  | 3          | 0        | 5      | 7     |
| Osterl. Gr.         | 2          | 1             | 2            | 13                  | 2          | 0        | 9      | 1     |
| Vogtl.-Erzgeb. Gr.  | 2          | 0             | 1            | 22                  | 0          | 0        | 3      | 2     |
| Thür. Gr.           | 1          | 0             | 1            | 11                  | 9          | 1        | 4      | 3     |
| Nordgr.             | 1          | 1             | 5            | 9                   | 3          | 1        | 9      | 1     |
|                     |            |               |              |                     |            |          |        |       |
| Summe               | 10         | 3             | 11           | <b>86</b>           | 21         | 2        | 33     | 14    |
| SPR 8 (Nordbair.)   |            |               |              |                     |            |          |        |       |
|                     | Meiß. Raum | Lausitz. Raum | Osterl. Raum | Vogtl.-Erzgeb. Raum | Thür. Raum | Nordraum | Sonst. | k. A. |
| Meiß. Gr.           | 0          | 2             | 0            | 16                  | 1          | 0        | 2      | 9     |
| Lausitz. Gr.        | 1          | 1             | 0            | 10                  | 1          | 0        | 5      | 12    |
| Osterl. Gr.         | 1          | 2             | 0            | 10                  | 4          | 0        | 11     | 2     |
| Vogtl.-Erzgeb. Gr.  | 0          | 0             | 0            | 20                  | 1          | 0        | 5      | 4     |
| Thür. Gr.           | 2          | 1             | 1            | 9                   | 2          | 0        | 12     | 3     |
| Nordgr.             | 0          | 0             | 0            | 4                   | 4          | 1        | 15     | 6     |
|                     |            |               |              |                     |            |          |        |       |
| Summe               | 4          | 6             | 1            | <b>69</b>           | 13         | 1        | 50     | 36    |

Tabelle 104: Die regionale Verortung der Sprecher durch die Befragten

|                  |                     |        | Ostmeißnischer Sprecher |       |       |                 |                 | Gesamt |
|------------------|---------------------|--------|-------------------------|-------|-------|-----------------|-----------------|--------|
|                  |                     |        | sehr gut                | gut   | egal  | nicht besonders | überhaupt nicht |        |
| Erhebungs-region | Thür. Gruppe        | Anzahl | 0                       | 10    | 3     | 3               | 0               | 16     |
|                  |                     | in %   | .0%                     | 15.4% | 4.6%  | 4.6%            | .0%             | 24.6%  |
|                  | Vogtl.-Erzg. Gruppe | Anzahl | 0                       | 7     | 3     | 0               | 1               | 11     |
|                  |                     | in %   | .0%                     | 10.8% | 4.6%  | .0%             | 1.5%            | 16.9%  |
|                  | Lausitz. Gruppe     | Anzahl | 1                       | 9     | 2     | 1               | 0               | 13     |
|                  |                     | in %   | 1.5%                    | 13.8% | 3.1%  | 1.5%            | .0%             | 20.0%  |
|                  | Osterl. Gruppe      | Anzahl | 0                       | 7     | 4     | 2               | 0               | 13     |
|                  |                     | in %   | .0%                     | 10.8% | 6.2%  | 3.1%            | .0%             | 20.0%  |
|                  | Nordgruppe          | Anzahl | 1                       | 4     | 7     | 0               | 0               | 12     |
|                  |                     | in %   | 1.5%                    | 6.2%  | 10.8% | .0%             | .0%             | 18.5%  |
| Gesamt           |                     | Anzahl | 2                       | 37    | 19    | 6               | 1               | 65     |
|                  |                     | in %   | 3.1%                    | 56.9% | 29.2% | 9.2%            | 1.5%            | 100.0% |

Tabelle 105: *Gefallen* des ostmeißnischen Sprechers bei autoreferenzieller regionaler Verortung

|                  |                     |        | Ostmeißnischer Sprecher |                  |                                  |                  | Gesamt |
|------------------|---------------------|--------|-------------------------|------------------|----------------------------------|------------------|--------|
|                  |                     |        | stark dialektal         | leicht dialektal | zwischen Hochdeutsch und Dialekt | mehr Hochdeutsch |        |
| Erhebungs-region | Thür. Gruppe        | Anzahl | 0                       | 3                | 8                                | 5                | 16     |
|                  |                     | in %   | .0%                     | 4.6%             | 12.3%                            | 7.7%             | 24.6%  |
|                  | Vogtl.-Erzg. Gruppe | Anzahl | 2                       | 2                | 6                                | 1                | 11     |
|                  |                     | in %   | 3.1%                    | 3.1%             | 9.2%                             | 1.5%             | 16.9%  |
|                  | Lausitz. Gruppe     | Anzahl | 1                       | 2                | 4                                | 6                | 13     |
|                  |                     | in %   | 1.5%                    | 3.1%             | 6.2%                             | 9.2%             | 20.0%  |
|                  | Osterl. Gruppe      | Anzahl | 0                       | 4                | 7                                | 2                | 13     |
|                  |                     | in %   | .0%                     | 6.2%             | 10.8%                            | 3.1%             | 20.0%  |
|                  | Nordgruppe          | Anzahl | 0                       | 2                | 6                                | 4                | 12     |
|                  |                     | in %   | .0%                     | 3.1%             | 9.2%                             | 6.2%             | 18.5%  |
| Gesamt           |                     | Anzahl | 3                       | 13               | 31                               | 18               | 65     |
|                  |                     | in %   | 4.6%                    | 20.0%            | 47.7%                            | 27.7%            | 100.0% |

Tabelle 106: *Korrektheit* des ostmeißnischen Sprechers bei autoreferenzieller regionaler Verortung (ausgenommen die meißn. Befragten)

|                 |                     |        | Ostmeißnischer Sprecher |       |      |                 | Gesamt |
|-----------------|---------------------|--------|-------------------------|-------|------|-----------------|--------|
|                 |                     |        | sehr gut                | gut   | egal | nicht besonders |        |
| Erhebungsregion | Thür. Gruppe        | Anzahl | 0                       | 3     | 1    | 0               | 4      |
|                 |                     | in %   | .0%                     | 7.0%  | 2.3% | .0%             | 9.3%   |
|                 | Vogtl.-Erzg. Gruppe | Anzahl | 0                       | 4     | 1    | 1               | 6      |
|                 |                     | in %   | .0%                     | 9.3%  | 2.3% | 2.3%            | 14.0%  |
|                 | Meißn. Gruppe       | Anzahl | 2                       | 10    | 3    | 1               | 16     |
|                 |                     | in %   | 4.7%                    | 23.3% | 7.0% | 2.3%            | 37.2%  |
|                 | Lausitz. Gruppe     | Anzahl | 0                       | 3     | 3    | 0               | 6      |
|                 |                     | in %   | .0%                     | 7.0%  | 7.0% | .0%             | 14.0%  |
|                 | Osterl. Gruppe      | Anzahl | 1                       | 3     | 2    | 1               | 7      |
|                 |                     | in %   | 2.3%                    | 7.0%  | 4.7% | 2.3%            | 16.3%  |
|                 | Nordgruppe          | Anzahl | 1                       | 2     | 1    | 0               | 4      |
|                 |                     | in %   | 2.3%                    | 4.7%  | 2.3% | .0%             | 9.3%   |
| Gesamt          | Anzahl              | 4      | 25                      | 11    | 3    | 43              |        |
|                 | in %                | 9.3%   | 58.1%                   | 25.6% | 7.0% | 100.0%          |        |

Tabelle 107: *Gefallen* des ostmeißnischen Sprechers bei korrekter regionaler Verortung

|                 |                     |        | Ostmeißnischer Sprecher |                  |                                  |                  | Gesamt |
|-----------------|---------------------|--------|-------------------------|------------------|----------------------------------|------------------|--------|
|                 |                     |        | stark dialektal         | leicht dialektal | zwischen Hochdeutsch und Dialekt | mehr Hochdeutsch |        |
| Erhebungsregion | Thür. Gruppe        | Anzahl | 0                       | 1                | 3                                | 0                | 4      |
|                 |                     | in %   | .0%                     | 2.3%             | 7.0%                             | .0%              | 9.3%   |
|                 | Vogtl.-Erzg. Gruppe | Anzahl | 1                       | 2                | 1                                | 2                | 6      |
|                 |                     | in %   | 2.3%                    | 4.7%             | 2.3%                             | 4.7%             | 14.0%  |
|                 | Meißn. Gruppe       | Anzahl | 2                       | 4                | 9                                | 1                | 16     |
|                 |                     | in %   | 4.7%                    | 9.3%             | 20.9%                            | 2.3%             | 37.2%  |
|                 | Lausitz. Gruppe     | Anzahl | 0                       | 4                | 1                                | 1                | 6      |
|                 |                     | in %   | .0%                     | 9.3%             | 2.3%                             | 2.3%             | 14.0%  |
|                 | Osterl. Gruppe      | Anzahl | 2                       | 3                | 1                                | 1                | 7      |
|                 |                     | in %   | 4.7%                    | 7.0%             | 2.3%                             | 2.3%             | 16.3%  |
|                 | Nordgruppe          | Anzahl | 0                       | 1                | 1                                | 2                | 4      |
|                 |                     | in %   | .0%                     | 2.3%             | 2.3%                             | 4.7%             | 9.3%   |
| Gesamt          | Anzahl              | 5      | 15                      | 16               | 7                                | 43               |        |
|                 | in %                | 11.6%  | 34.9%                   | 37.2%            | 16.3%                            | 100.0%           |        |

Tabelle 108: *Korrektheit* des ostmeißnischen Sprechers bei korrekter regionaler Verortung

| Ostmeißnischer Sprecher:<br><i>Gefallen</i> |           |      | Ostmeißnischer Sprecher:<br><i>Korrektheit</i> |      |
|---------------------------------------------|-----------|------|------------------------------------------------|------|
|                                             | $\bar{x}$ | s    | $\bar{x}$                                      | s    |
| Thür. Gruppe (korrekte Ident.)              | 2.25      | 0.50 | 2.75                                           | 0.50 |
| Thür. Gruppe (eigene Ident.)                | 2.56      | 0.81 | 2.56                                           | 0.81 |
| Vogtl.-Erzg. Gruppe (korrekte Ident.)       | 2.50      | 0.84 | 2.67                                           | 1.20 |
| Vogtl.-Erzg. Gruppe (eigene Ident.)         | 2.55      | 0.93 | 2.55                                           | 0.93 |
| Meißn. Gruppe (korrekte/ eigene Ident.)     | 2.19      | 0.75 | 2.56                                           | 0.81 |
| Lausitz. Gruppe (korrekte Ident.)           | 2.50      | 0.55 | 2.50                                           | 0.83 |
| Lausitz. Gruppe (eigene Ident.)             | 2.23      | 0.72 | 2.23                                           | 0.72 |
| Osterl. Gruppe (korrekte Ident.)            | 2.43      | 0.98 | 2.14                                           | 1.07 |
| Osterl. Gruppe (eigene Ident.)              | 2.62      | 0.76 | 2.62                                           | 0.76 |
| Nordgruppe (korrekte Ident.)                | 2.00      | 0.82 | 3.25                                           | 0.96 |
| Nordgruppe (eigene Ident.)                  | 2.50      | 0.67 | 2.50                                           | 0.67 |
| intergruppal: nicht signifikant             |           |      | intergruppal: nicht signifikant                |      |
| intragruppal: nicht signifikant             |           |      | intragruppal: nicht signifikant                |      |

Tabelle 109: Intergruppaler Vergleich der Variablen *Gefallen* und *Korrektheit* bei autoreferenzieller und korrekter Verortung des ostmeißnischen Sprechers

|                 |                     |        | Osterländischer Sprecher |       |       |                 |                 | Gesamt |
|-----------------|---------------------|--------|--------------------------|-------|-------|-----------------|-----------------|--------|
|                 |                     |        | sehr gut                 | gut   | egal  | nicht besonders | überhaupt nicht |        |
| Erhebungsregion | Thür. Gruppe        | Anzahl | 0                        | 7     | 9     | 1               | 0               | 17     |
|                 |                     | in %   | .0%                      | 11.7% | 15.0% | 1.7%            | .0%             | 28.3%  |
|                 | Vogtl.-Erzg. Gruppe | Anzahl | 0                        | 2     | 2     | 2               | 1               | 7      |
|                 |                     | in %   | .0%                      | 3.3%  | 3.3%  | 3.3%            | 1.7%            | 11.7%  |
|                 | Meißn. Gruppe       | Anzahl | 2                        | 12    | 2     | 2               | 0               | 18     |
|                 |                     | in %   | 3.3%                     | 20.0% | 3.3%  | 3.3%            | .0%             | 30.0%  |
|                 | Lausitz. Gruppe     | Anzahl | 0                        | 9     | 0     | 0               | 0               | 9      |
|                 |                     | in %   | .0%                      | 15.0% | .0%   | .0%             | .0%             | 15.0%  |
|                 | Nordgruppe          | Anzahl | 1                        | 3     | 3     | 2               | 0               | 9      |
|                 |                     | in %   | 1.7%                     | 5.0%  | 5.0%  | 3.3%            | .0%             | 15.0%  |
| Gesamt          |                     | Anzahl | 3                        | 33    | 16    | 7               | 1               | 60     |
|                 |                     | in %   | 5.0%                     | 55.0% | 26.7% | 11.7%           | 1.7%            | 100.0% |

Tabelle 110: *Gefallen* des osterländischen Sprechers bei autoreferenzieller regionaler Verortung

|                      |                        |        | Osterländischer Sprecher |                     |                                        |                     | Gesamt |
|----------------------|------------------------|--------|--------------------------|---------------------|----------------------------------------|---------------------|--------|
|                      |                        |        | stark<br>dialektal       | leicht<br>dialektal | zwischen<br>Hochdeutsch<br>und Dialekt | mehr<br>Hochdeutsch |        |
| Erhebungs-<br>region | Thür. Gruppe           | Anzahl | 0                        | 10                  | 6                                      | 1                   | 17     |
|                      |                        | in %   | .0%                      | 16.7%               | 10.0%                                  | 1.7%                | 28.3%  |
|                      | Vogtl.-Erzg.<br>Gruppe | Anzahl | 1                        | 5                   | 1                                      | 0                   | 7      |
|                      |                        | in %   | 1.7%                     | 8.3%                | 1.7%                                   | .0%                 | 11.7%  |
|                      | Meißn. Gruppe          | Anzahl | 2                        | 9                   | 6                                      | 1                   | 18     |
|                      |                        | in %   | 3.3%                     | 15.0%               | 10.0%                                  | 1.7%                | 30.0%  |
|                      | Lausitz. Gruppe        | Anzahl | 1                        | 2                   | 4                                      | 2                   | 9      |
|                      |                        | in %   | 1.7%                     | 3.3%                | 6.7%                                   | 3.3%                | 15.0%  |
|                      | Nordgruppe             | Anzahl | 0                        | 3                   | 5                                      | 1                   | 9      |
|                      |                        | in %   | .0%                      | 5.0%                | 8.3%                                   | 1.7%                | 15.0%  |
| Gesamt               |                        | Anzahl | 4                        | 29                  | 22                                     | 5                   | 60     |
|                      |                        | in %   | 6.7%                     | 48.3%               | 36.7%                                  | 8.3%                | 100.0% |

Tabelle 111: *Korrektheit* des osterländischen Sprechers bei autoreferenzieller regionaler Verortung (ausgenommen die osterl. Befragten)

|                      |                        |        | Osterländischer Sprecher |       |       |                    |                    | Gesamt |
|----------------------|------------------------|--------|--------------------------|-------|-------|--------------------|--------------------|--------|
|                      |                        |        | sehr<br>gut              | gut   | egal  | nicht<br>besonders | überhaupt<br>nicht |        |
| Erhebungs-<br>region | Thür. Gruppe           | Anzahl | 0                        | 0     | 1     | 0                  | 0                  | 1      |
|                      |                        | in %   | .0%                      | .0%   | 2.1%  | .0%                | .0%                | 2.1%   |
|                      | Vogtl.-Erzg.<br>Gruppe | Anzahl | 0                        | 2     | 2     | 1                  | 2                  | 7      |
|                      |                        | in %   | .0%                      | 4.2%  | 4.2%  | 2.1%               | 4.2%               | 14.6%  |
|                      | Meißn. Gruppe          | Anzahl | 1                        | 4     | 2     | 0                  | 0                  | 7      |
|                      |                        | in %   | 2.1%                     | 8.3%  | 4.2%  | .0%                | .0%                | 14.6%  |
|                      | Lausitz. Gruppe        | Anzahl | 0                        | 2     | 1     | 0                  | 0                  | 3      |
|                      |                        | in %   | .0%                      | 4.2%  | 2.1%  | .0%                | .0%                | 6.3%   |
|                      | Osterl. Gruppe         | Anzahl | 2                        | 6     | 6     | 8                  | 1                  | 23     |
|                      |                        | in %   | 4.2%                     | 12.5% | 12.5% | 16.7%              | 2.1%               | 47.9%  |
|                      | Nordgruppe             | Anzahl | 0                        | 1     | 3     | 2                  | 1                  | 7      |
|                      |                        | in %   | .0%                      | 2.1%  | 6.3%  | 4.2%               | 2.1%               | 14.6%  |
| Gesamt               |                        | Anzahl | 3                        | 15    | 15    | 11                 | 4                  | 48     |
|                      |                        | in %   | 6.3%                     | 31.3% | 31.3% | 22.9%              | 8.3%               | 100.0% |

Tabelle 112: *Gefallen* des osterländischen Sprechers bei korrekter regionaler Verortung



|                      |                        |        | Osterländischer Sprecher |                     |                                        |                     | Gesamt |
|----------------------|------------------------|--------|--------------------------|---------------------|----------------------------------------|---------------------|--------|
|                      |                        |        | stark<br>dialektal       | leicht<br>dialektal | zwischen<br>Hochdeutsch<br>und Dialekt | mehr<br>Hochdeutsch |        |
| Erhebungs-<br>region | Thür. Gruppe           | Anzahl | 0                        | 0                   | 1                                      | 0                   | 1      |
|                      |                        | in %   | .0%                      | .0%                 | 2.1%                                   | .0%                 | 2.1%   |
|                      | Vogtl.-Erzg.<br>Gruppe | Anzahl | 2                        | 3                   | 0                                      | 2                   | 7      |
|                      |                        | in %   | 4.2%                     | 6.3%                | .0%                                    | 4.2%                | 14.6%  |
|                      | Meißn. Gruppe          | Anzahl | 1                        | 2                   | 3                                      | 1                   | 7      |
|                      |                        | in %   | 2.1%                     | 4.2%                | 6.3%                                   | 2.1%                | 14.6%  |
|                      | Lausitz. Gruppe        | Anzahl | 0                        | 1                   | 1                                      | 1                   | 3      |
|                      |                        | in %   | .0%                      | 2.1%                | 2.1%                                   | 2.1%                | 6.3%   |
|                      | Osterl. Gruppe         | Anzahl | 9                        | 6                   | 7                                      | 1                   | 23     |
|                      |                        | in %   | 18.8%                    | 12.5%               | 14.6%                                  | 2.1%                | 47.9%  |
|                      | Nordgruppe             | Anzahl | 2                        | 5                   | 0                                      | 0                   | 7      |
|                      |                        | in %   | 4.2%                     | 10.4%               | .0%                                    | .0%                 | 14.6%  |
|                      | Gesamt                 | Anzahl | 14                       | 17                  | 12                                     | 5                   | 48     |
|                      |                        | in %   | 29.2%                    | 35.4%               | 25.0%                                  | 10.4%               | 100.0% |

Tabelle 113: *Korrektheit* des osterländischen Sprechers bei korrekter regionaler Verortung

| Osterländischer Sprecher:<br><i>Gefallen</i> |           |      | Osterländischer Sprecher:<br><i>Korrektheit</i>                                              |      |      |
|----------------------------------------------|-----------|------|----------------------------------------------------------------------------------------------|------|------|
|                                              | $\bar{x}$ | s    | $\bar{x}$                                                                                    | s    |      |
| Thür. Gruppe (korrekte Ident.)               | 3.00      | 0.00 | 3.00                                                                                         | 0.00 |      |
| Thür. Gruppe (eigene Ident.)                 | 2.65      | 0.60 | 2.47                                                                                         | 0.62 |      |
| Vogtl.-Erzg. Gruppe (korrekte Ident.)        | 3.43      | 1.27 | 2.29                                                                                         | 1.25 |      |
| Vogtl.-Erzg. Gruppe (eigene Ident.)          | 3.29      | 1.11 | 2.00                                                                                         | 0.57 |      |
| Meißn. Gruppe (korrekte Ident.)              | 2.14      | 0.69 | 2.57                                                                                         | 0.97 |      |
| Meißn. Gruppe (eigene Ident.)                | 2.22      | 0.80 | 2.33                                                                                         | 0.76 |      |
| Lausitz. Gruppe (korrekte Ident.)            | 2.33      | 0.57 | 3.00                                                                                         | 1.00 |      |
| Lausitz. Gruppe (eigene Ident.)              | 2.00      | 0.00 | 2.78                                                                                         | 0.97 |      |
| Osterl. Gruppe (korrekte/ eigene Ident.)     | 3.00      | 1.08 | 2.00                                                                                         | 0.95 |      |
| Nordgruppe (korrekte Ident.)                 | 3.43      | 0.97 | 2.78                                                                                         | 0.48 |      |
| Nordgruppe (eigene Ident.)                   | 2.67      | 1.00 | **                                                                                           | 1.71 | 0.67 |
| intergruppal: nicht signifikant              |           |      | intergruppal: nicht signifikant                                                              |      |      |
| intragruppal: nicht signifikant              |           |      | intragruppal: nicht signifikant<br>bis auf die Nordgruppe<br>** sehr signifikant (p = 0.003) |      |      |

Tabelle 114: Intergruppaler Vergleich der Variablen *Gefallen* und *Korrektheit* bei autoreferenzieller und korrekter Verortung des osterländischen Sprechers

|                 |                 |        | Vorerzgebirgischer Sprecher |       |       |                 |                 | Gesamt |
|-----------------|-----------------|--------|-----------------------------|-------|-------|-----------------|-----------------|--------|
|                 |                 |        | sehr gut                    | gut   | egal  | nicht besonders | überhaupt nicht |        |
| Erhebungsregion | Thür. Gruppe    | Anzahl | 0                           | 9     | 5     | 3               | 0               | 17     |
|                 |                 | in %   | .0%                         | 17.3% | 9.6%  | 5.8%            | .0%             | 32.7%  |
|                 | Meißn. Gruppe   | Anzahl | 1                           | 6     | 2     | 2               | 0               | 11     |
|                 |                 | in %   | 1.9%                        | 11.5% | 3.8%  | 3.8%            | .0%             | 21.2%  |
|                 | Lausitz. Gruppe | Anzahl | 0                           | 6     | 0     | 1               | 0               | 7      |
|                 |                 | in %   | .0%                         | 11.5% | .0%   | 1.9%            | .0%             | 13.5%  |
|                 | Osterl. Gruppe  | Anzahl | 0                           | 2     | 3     | 4               | 1               | 10     |
|                 |                 | in %   | .0%                         | 3.8%  | 5.8%  | 7.7%            | 1.9%            | 19.2%  |
|                 | Nordgruppe      | Anzahl | 0                           | 2     | 2     | 3               | 0               | 7      |
|                 |                 | in %   | .0%                         | 3.8%  | 3.8%  | 5.8%            | .0%             | 13.5%  |
| Gesamt          | Anzahl          | 1      | 25                          | 12    | 13    | 1               | 52              |        |
|                 | in %            | 1.9%   | 48.1%                       | 23.1% | 25.0% | 1.9%            | 100.0%          |        |

Tabelle 115: *Gefallen* des osterländischen Sprechers bei autoreferenzieller regionaler Verortung (ausgenommen die vogtl-erzgeb. Gruppe)

|                 |                 |        | Vorerzgebirgischer Sprecher |                  |                                  |                  |                    | Gesamt |
|-----------------|-----------------|--------|-----------------------------|------------------|----------------------------------|------------------|--------------------|--------|
|                 |                 |        | stark dialektal             | leicht dialektal | zwischen Hochdeutsch und Dialekt | mehr Hochdeutsch | reines Hochdeutsch |        |
| Erhebungsregion | Thür. Gruppe    | Anzahl | 1                           | 5                | 9                                | 2                | 0                  | 17     |
|                 |                 | in %   | 1.9%                        | 9.6%             | 17.3%                            | 3.8%             | .0%                | 32.7%  |
|                 | Meißn. Gruppe   | Anzahl | 1                           | 7                | 3                                | 0                | 0                  | 11     |
|                 |                 | in %   | 1.9%                        | 13.5%            | 5.8%                             | .0%              | .0%                | 21.2%  |
|                 | Lausitz. Gruppe | Anzahl | 1                           | 0                | 3                                | 2                | 1                  | 7      |
|                 |                 | in %   | 1.9%                        | .0%              | 5.8%                             | 3.8%             | 1.9%               | 13.5%  |
|                 | Osterl. Gruppe  | Anzahl | 2                           | 5                | 3                                | 0                | 0                  | 10     |
|                 |                 | in %   | 3.8%                        | 9.6%             | 5.8%                             | .0%              | .0%                | 19.2%  |
|                 | Nord-Gruppe     | Anzahl | 0                           | 3                | 3                                | 1                | 0                  | 7      |
|                 |                 | in %   | .0%                         | 5.8%             | 5.8%                             | 1.9%             | .0%                | 13.5%  |
| Gesamt          | Anzahl          | 5      | 20                          | 21               | 5                                | 1                | 52                 |        |
|                 | in %            | 9.6%   | 38.5%                       | 40.4%            | 9.6%                             | 1.9%             | 100.0%             |        |

Tabelle 116: *Korrektheit* des osterländischen Sprechers bei autoreferenzieller regionaler Verortung

|                 |                     |        | Vorerzgebirgischer Sprecher |       |       |                 |                 | Gesamt |
|-----------------|---------------------|--------|-----------------------------|-------|-------|-----------------|-----------------|--------|
|                 |                     |        | sehr gut                    | gut   | egal  | nicht besonders | überhaupt nicht |        |
| Erhebungsregion | Thür. Gruppe        | Anzahl | 0                           | 1     | 4     | 1               | 0               | 6      |
|                 |                     | in %   | .0%                         | 2.0%  | 8.2%  | 2.0%            | .0%             | 12.2%  |
|                 | Vogtl.-Erzg. Gruppe | Anzahl | 0                           | 5     | 11    | 2               | 1               | 19     |
|                 |                     | in %   | .0%                         | 10.2% | 22.4% | 4.1%            | 2.0%            | 38.8%  |
|                 | Meißn. Gruppe       | Anzahl | 1                           | 5     | 1     | 1               | 1               | 9      |
|                 |                     | in %   | 2.0%                        | 10.2% | 2.0%  | 2.0%            | 2.0%            | 18.4%  |
|                 | Lausitz. Gruppe     | Anzahl | 1                           | 3     | 0     | 1               | 0               | 5      |
|                 |                     | in %   | 2.0%                        | 6.1%  | .0%   | 2.0%            | .0%             | 10.2%  |
|                 | Osterl. Gruppe      | Anzahl | 0                           | 3     | 0     | 0               | 2               | 5      |
|                 |                     | in %   | .0%                         | 6.1%  | .0%   | .0%             | 4.1%            | 10.2%  |
|                 | Nordgruppe          | Anzahl | 0                           | 2     | 1     | 1               | 1               | 5      |
|                 |                     | in %   | .0%                         | 4.1%  | 2.0%  | 2.0%            | 2.0%            | 10.2%  |
| Gesamt          | Anzahl              | 2      | 19                          | 17    | 6     | 5               | 49              |        |
|                 | in %                | 4.1%   | 38.8%                       | 34.7% | 12.2% | 10.2%           | 100.0%          |        |

Tabelle 117: *Gefallen* des vorerzgebirgischen Sprechers bei korrekter regionaler Verortung

|                 |                     |        | Vorerzgebirgischer Sprecher |                  |                                  |                  | Gesamt |
|-----------------|---------------------|--------|-----------------------------|------------------|----------------------------------|------------------|--------|
|                 |                     |        | stark dialektal             | leicht dialektal | zwischen Hochdeutsch und Dialekt | mehr Hochdeutsch |        |
| Erhebungsregion | Thür. Gruppe        | Anzahl | 1                           | 4                | 1                                | 0                | 6      |
|                 |                     | in %   | 2.0%                        | 8.2%             | 2.0%                             | .0%              | 12.2%  |
|                 | Vogtl.-Erzg. Gruppe | Anzahl | 3                           | 7                | 5                                | 4                | 19     |
|                 |                     | in %   | 6.1%                        | 14.3%            | 10.2%                            | 8.2%             | 38.8%  |
|                 | Meißn. Gruppe       | Anzahl | 3                           | 4                | 1                                | 1                | 9      |
|                 |                     | in %   | 6.1%                        | 8.2%             | 2.0%                             | 2.0%             | 18.4%  |
|                 | Lausitz. Gruppe     | Anzahl | 1                           | 3                | 0                                | 1                | 5      |
|                 |                     | in %   | 2.0%                        | 6.1%             | .0%                              | 2.0%             | 10.2%  |
|                 | Osterl. Gruppe      | Anzahl | 2                           | 1                | 1                                | 1                | 5      |
|                 |                     | in %   | 4.1%                        | 2.0%             | 2.0%                             | 2.0%             | 10.2%  |
|                 | Nordgruppe          | Anzahl | 1                           | 3                | 0                                | 1                | 5      |
|                 |                     | in %   | 2.0%                        | 6.1%             | .0%                              | 2.0%             | 10.2%  |
| Gesamt          | Anzahl              | 11     | 22                          | 8                | 8                                | 49               |        |
|                 | in %                | 22.4%  | 44.9%                       | 16.3%            | 16.3%                            | 100.0%           |        |

Tabelle 118: *Korrektheit* des vorerzgebirgischen Sprechers bei korrekter regionaler Verortung

| Vorerzgebirgischer Sprecher: Gefallen         |           |      | Vorerzgebirgischer Sprecher: Korrektheit |      |
|-----------------------------------------------|-----------|------|------------------------------------------|------|
|                                               | $\bar{x}$ | s    | $\bar{x}$                                | s    |
| Thür. Gruppe (korrekte Ident.)                | 3.00      | 0.63 | 2.00                                     | 0.63 |
| Thür. Gruppe (eigene Ident.)                  | 2.65      | 0.78 | 2.71                                     | 0.77 |
| Vogtl.-Erzg. Gruppe (korrekte/ eigene Ident.) | 3.00      | 0.76 | 2.56                                     | 1.04 |
| Meißn. Gruppe (korrekte Ident.)               | 2.56      | 1.23 | 2.00                                     | 1.00 |
| Meißn. Gruppe (eigene Ident.)                 | 2.45      | 0.93 | 2.18                                     | 0.60 |
| Lausitz. Gruppe (korrekte Ident.)             | 2.20      | 1.09 | 2.20                                     | 1.09 |
| Lausitz. Gruppe (eigene Ident.)               | 2.29      | 0.76 | 3.29                                     | 1.25 |
| Osterl. Gruppe (korrekte Ident.)              | 3.20      | 1.64 | 2.20                                     | 1.30 |
| Osterl. Gruppe (eigene Ident.)                | 3.40      | 0.96 | 2.10                                     | 0.73 |
| Nordgruppe (korrekte Ident.)                  | 3.20      | 1.30 | 2.20                                     | 1.09 |
| Nordgruppe (eigene Ident.)                    | 3.14      | 0.90 | 2.71                                     | 0.76 |
| intergruppal: nicht signifikant               |           |      | intergruppal: nicht signifikant          |      |
| intragruppal: nicht signifikant               |           |      | intragruppal: nicht signifikant          |      |

Tabelle 119: Intergruppaler Vergleich der Variablen *Gefallen* und *Korrektheit* bei autoreferenzieller und korrekter Verortung des vorerzgebirgischen Sprechers

|                                                 |           |      |                                                    |      |
|-------------------------------------------------|-----------|------|----------------------------------------------------|------|
| Oberlausitzischer Sprecher<br><i>Gefallen</i>   |           |      | Oberlausitzischer Sprecher<br><i>Korrektheit</i>   |      |
|                                                 | $\bar{x}$ | s    | $\bar{x}$                                          | s    |
| Thür. Gruppe                                    | 2.43      | 1.13 | 1.14                                               | 0.38 |
| Vogtl.-Erzg. Gruppe                             | 2.27      | 0.88 | 1.60                                               | 0.63 |
| Meißn. Gruppe                                   | 2.48      | 1.16 | 1.56                                               | 0.92 |
| Lausitz. Gruppe                                 | 2.16      | 1.14 | 1.36                                               | 0.57 |
| Osterl. Gruppe                                  | 2.47      | 0.99 | 1.53                                               | 0.52 |
| Nordgruppe                                      | 2.57      | 0.98 | 1.86                                               | 0.69 |
| Gesamt                                          | 2.36      | 1.06 | 1.50                                               | 0.68 |
| intergruppal: nicht signifikant                 |           |      | intergruppal: nicht signifikant                    |      |
| Nordosterländischer Sprecher<br><i>Gefallen</i> |           |      | Nordosterländischer Sprecher<br><i>Korrektheit</i> |      |
|                                                 | $\bar{x}$ | s    | $\bar{x}$                                          | s    |
| Thür. Gruppe                                    | 2.46      | 0.66 | 2.92                                               | 0.76 |
| Vogtl.-Erzg. Gruppe                             | 2.71      | 0.76 | 2.14                                               | 1.07 |
| Meißn. Gruppe                                   | 2.21      | 0.80 | 2.86                                               | 0.86 |
| Lausitz. Gruppe                                 | 3.63      | 1.19 | 2.63                                               | 1.30 |
| Osterl. Gruppe                                  | 2.58      | 0.84 | 3.11                                               | 0.74 |
| Nordgruppe                                      | 2.59      | 0.95 | 3.17                                               | 0.85 |
| Gesamt                                          | 2.61      | 0.92 | 2.94                                               | 0.90 |
| intergruppal: * signifikant ( $p = 0.021$ )     |           |      | intergruppal: nicht signifikant                    |      |
| Westerzgebirgischer Sprecher<br><i>Gefallen</i> |           |      | Westerzgebirgischer Sprecher<br><i>Korrektheit</i> |      |
|                                                 | $\bar{x}$ | s    | $\bar{x}$                                          | s    |
| Thür. Gruppe                                    | 2.13      | 0.34 | 1.63                                               | 0.62 |
| Vogtl.-Erzg. Gruppe                             | 2.11      | 0.97 | 1.30                                               | 0.47 |
| Meißn. Gruppe                                   | 2.38      | 1.06 | 1.42                                               | 0.81 |
| Lausitz. Gruppe                                 | 2.38      | 0.92 | 1.29                                               | 0.46 |
| Osterl. Gruppe                                  | 2.78      | 1.20 | 1.26                                               | 0.69 |
| Nordgruppe                                      | 2.79      | 1.12 | 1.36                                               | 0.50 |
| Gesamt                                          | 2.41      | 1.01 | 1.36                                               | 0.61 |
| intergruppal: nicht signifikant                 |           |      | intergruppal: nicht signifikant                    |      |
| Vogtländischer Sprecher<br><i>Gefallen</i>      |           |      | Vogtländischer Sprecher<br><i>Korrektheit</i>      |      |

|                                            | $\bar{x}$ | s    | $\bar{x}$                                     | s    |
|--------------------------------------------|-----------|------|-----------------------------------------------|------|
| Thür. Gruppe                               | 2.82      | 0.75 | 1.91                                          | 0.54 |
| Vogtl.-Erzg. Gruppe                        | 2.55      | 1.30 | 1.68                                          | 0.78 |
| Meißn. Gruppe                              | 2.57      | 0.87 | 1.81                                          | 0.60 |
| Lausitz. Gruppe                            | 2.10      | 0.88 | 1.80                                          | 0.63 |
| Osterl. Gruppe                             | 3.08      | 1.04 | 2.23                                          | 0.83 |
| Nordgruppe                                 | 3.00      | 1.12 | 1.78                                          | 0.83 |
| Gesamt                                     | 2.66      | 1.05 | 1.85                                          | 0.71 |
| intergruppal: nicht signifikant            |           |      | intergruppal: nicht signifikant               |      |
| Nordbairischer Sprecher<br><i>Gefallen</i> |           |      | Nordbairischer Sprecher<br><i>Korrektheit</i> |      |
|                                            | $\bar{x}$ | s    | $\bar{x}$                                     | s    |
| Thür. Gruppe                               | 3.33      | 1.00 | 1.44                                          | 0.73 |
| Vogtl.-Erzg. Gruppe                        | 2.65      | 1.14 | 2.05                                          | 0.69 |
| Meißn. Gruppe                              | 3.31      | 1.14 | 1.60                                          | 0.63 |
| Lausitz. Gruppe                            | 2.60      | 1.17 | 2.10                                          | 0.88 |
| Osterl. Gruppe                             | 3.40      | 0.70 | 1.70                                          | 0.82 |
| Nordgruppe                                 | 2.25      | 0.96 | 2.00                                          | 0.82 |
| Gesamt                                     | 2.97      | 1.10 | 1.82                                          | 0.75 |
| intergruppal: nicht signifikant            |           |      | intergruppal: nicht signifikant               |      |

Tabelle 120: Intergruppaler Vergleich des *Gefallens* und der *Korrektheit* der Sprecher

| Erhebungsregion       | Untergruppe für Alpha = .05. |       |
|-----------------------|------------------------------|-------|
|                       | 1                            | 2     |
| Meißn. Gruppe         | 2.21                         |       |
| Thür. Gruppe          | 2.46                         |       |
| Osterl. Gruppe        | 2.58                         |       |
| Nordgruppe            | 2.59                         |       |
| Vogtl.-Erzgeb. Gruppe | 2.71                         |       |
| Lausitz. Gruppe       |                              | 3.63  |
| Signifikanz           | .222                         | 1.000 |

Die Mittelwerte für die in homogenen Untergruppen befindlichen Gruppen werden angezeigt.

a Verwendet ein harmonisches Mittel für Stichprobengröße = 11.921.

b Die Gruppengrößen sind nicht identisch. Es wird das harmonische Mittel der Gruppengrößen verwendet. Fehlerniveaus des Typs I sind nicht garantiert.

Tabelle 121: Intergruppenvergleich der Variable *Gefallen* des nordosterländischen Sprechers durch den Duncan-Test

|                 |                       |        | Oberlausitzischer Sprecher |       |       |                 |                 | Gesamt |
|-----------------|-----------------------|--------|----------------------------|-------|-------|-----------------|-----------------|--------|
|                 |                       |        | sehr gut                   | gut   | egal  | nicht besonders | überhaupt nicht |        |
| Erhebungsregion | Thür. Gruppe          | Anzahl | 1                          | 4     | 0     | 2               | 0               | 7      |
|                 |                       | in %   | 1.1%                       | 4.3%  | .0%   | 2.1%            | .0%             | 7.4%   |
|                 | Vogtl.-Erzgeb. Gruppe | Anzahl | 1                          | 11    | 2     | 0               | 1               | 15     |
|                 |                       | in %   | 1.1%                       | 11.7% | 2.1%  | .0%             | 1.1%            | 16.0%  |
|                 | Meißn. Gruppe         | Anzahl | 5                          | 10    | 4     | 5               | 1               | 25     |
|                 |                       | in %   | 5.3%                       | 10.6% | 4.3%  | 5.3%            | 1.1%            | 26.6%  |
|                 | Lausitz. Gruppe       | Anzahl | 7                          | 12    | 3     | 1               | 2               | 25     |
|                 |                       | in %   | 7.4%                       | 12.8% | 3.2%  | 1.1%            | 2.1%            | 26.6%  |
|                 | Osterl. Gruppe        | Anzahl | 2                          | 7     | 3     | 3               | 0               | 15     |
|                 |                       | in %   | 2.1%                       | 7.4%  | 3.2%  | 3.2%            | .0%             | 16.0%  |
|                 | Nordgruppe            | Anzahl | 1                          | 2     | 3     | 1               | 0               | 7      |
|                 |                       | in %   | 1.1%                       | 2.1%  | 3.2%  | 1.1%            | .0%             | 7.4%   |
| Gesamt          |                       | Anzahl | 17                         | 46    | 15    | 12              | 4               | 94     |
|                 |                       | in %   | 18.1%                      | 48.9% | 16.0% | 12.8%           | 4.3%            | 100.0% |

Tabelle 122: *Gefallen* des oberlausitzischen Sprechers

|                      |                        |        | Oberlausitzischer Sprecher |                     |                                        |                     | Gesamt |
|----------------------|------------------------|--------|----------------------------|---------------------|----------------------------------------|---------------------|--------|
|                      |                        |        | stark<br>dialektal         | leicht<br>dialektal | zwischen<br>Hochdeutsch<br>und Dialekt | mehr<br>Hochdeutsch |        |
| Erhebungs-<br>region | Thür. Gruppe           | Anzahl | 6                          | 1                   | 0                                      | 0                   | 7      |
|                      |                        | in %   | 6.4%                       | 1.1%                | .0%                                    | .0%                 | 7.4%   |
|                      | Vogtl.-Erzg.<br>Gruppe | Anzahl | 7                          | 7                   | 1                                      | 0                   | 15     |
|                      |                        | in %   | 7.4%                       | 7.4%                | 1.1%                                   | .0%                 | 16.0%  |
|                      | Meißn. Gruppe          | Anzahl | 16                         | 6                   | 1                                      | 2                   | 25     |
|                      |                        | in %   | 17.0%                      | 6.4%                | 1.1%                                   | 2.1%                | 26.6%  |
|                      | Lausitz. Gruppe        | Anzahl | 17                         | 7                   | 1                                      | 0                   | 25     |
|                      |                        | in %   | 18.1%                      | 7.4%                | 1.1%                                   | .0%                 | 26.6%  |
|                      | Osterl. Gruppe         | Anzahl | 7                          | 8                   | 0                                      | 0                   | 15     |
|                      |                        | in %   | 7.4%                       | 8.5%                | .0%                                    | .0%                 | 16.0%  |
|                      | Nordgruppe             | Anzahl | 2                          | 4                   | 1                                      | 0                   | 7      |
|                      |                        | in %   | 2.1%                       | 4.3%                | 1.1%                                   | .0%                 | 7.4%   |
| Gesamt               |                        | Anzahl | 55                         | 33                  | 4                                      | 2                   | 94     |
|                      |                        | in %   | 58.5%                      | 35.1%               | 4.3%                                   | 2.1%                | 100.0% |

Tabelle 123: *Korrektheit* des oberlausitzischen Sprechers

|                      |                        |        | Nordosterländischer Sprecher |       |       |                    |                    | Gesamt |
|----------------------|------------------------|--------|------------------------------|-------|-------|--------------------|--------------------|--------|
|                      |                        |        | sehr<br>gut                  | gut   | egal  | nicht<br>besonders | überhaupt<br>nicht |        |
| Erhebungs-<br>region | Thür. Gruppe           | Anzahl | 0                            | 8     | 4     | 1                  | 0                  | 13     |
|                      |                        | in %   | .0%                          | 8.9%  | 4.4%  | 1.1%               | .0%                | 14.4%  |
|                      | Vogtl.-Erzg.<br>Gruppe | Anzahl | 0                            | 3     | 3     | 1                  | 0                  | 7      |
|                      |                        | in %   | .0%                          | 3.3%  | 3.3%  | 1.1%               | .0%                | 7.8%   |
|                      | Meißn. Gruppe          | Anzahl | 2                            | 8     | 3     | 1                  | 0                  | 14     |
|                      |                        | in %   | 2.2%                         | 8.9%  | 3.3%  | 1.1%               | .0%                | 15.6%  |
|                      | Lausitz. Gruppe        | Anzahl | 0                            | 2     | 1     | 3                  | 2                  | 8      |
|                      |                        | in %   | .0%                          | 2.2%  | 1.1%  | 3.3%               | 2.2%               | 8.9%   |
|                      | Osterl. Gruppe         | Anzahl | 0                            | 11    | 6     | 1                  | 1                  | 19     |
|                      |                        | in %   | .0%                          | 12.2% | 6.7%  | 1.1%               | 1.1%               | 21.1%  |
|                      | Nordgruppe             | Anzahl | 2                            | 14    | 8     | 4                  | 1                  | 29     |
|                      |                        | in %   | 2.2%                         | 15.6% | 8.9%  | 4.4%               | 1.1%               | 32.2%  |
| Gesamt               |                        | Anzahl | 4                            | 46    | 25    | 11                 | 4                  | 90     |
|                      |                        | in %   | 4.4%                         | 51.1% | 27.8% | 12.2%              | 4.4%               | 100.0% |

Tabelle 124: *Gefallen* des nordosterländischen Sprechers



|                      |                        |        | Nordosterländischer Sprecher |                     |                                             |                          |                            | Gesamt |
|----------------------|------------------------|--------|------------------------------|---------------------|---------------------------------------------|--------------------------|----------------------------|--------|
|                      |                        |        | stark<br>dialektal           | leicht<br>dialektal | zwischen<br>Hoch-<br>deutsch<br>und Dialekt | mehr<br>Hoch-<br>deutsch | reines<br>Hoch-<br>deutsch |        |
| Erhebungs-<br>region | Thür.<br>Gruppe        | Anzahl | 0                            | 4                   | 6                                           | 3                        | 0                          | 13     |
|                      |                        | in %   | .0%                          | 4.4%                | 6.7%                                        | 3.3%                     | .0%                        | 14.4%  |
|                      | Vogtl.-Erzg.<br>Gruppe | Anzahl | 2                            | 3                   | 1                                           | 1                        | 0                          | 7      |
|                      |                        | in %   | 2.2%                         | 3.3%                | 1.1%                                        | 1.1%                     | .0%                        | 7.8%   |
|                      | Meißn.<br>Gruppe       | Anzahl | 1                            | 3                   | 7                                           | 3                        | 0                          | 14     |
|                      |                        | in %   | 1.1%                         | 3.3%                | 7.8%                                        | 3.3%                     | .0%                        | 15.6%  |
|                      | Lausitz.<br>Gruppe     | Anzahl | 2                            | 2                   | 1                                           | 3                        | 0                          | 8      |
|                      |                        | in %   | 2.2%                         | 2.2%                | 1.1%                                        | 3.3%                     | .0%                        | 8.9%   |
|                      | Osterl.<br>Gruppe      | Anzahl | 1                            | 1                   | 12                                          | 5                        | 0                          | 19     |
| in %                 |                        | 1.1%   | 1.1%                         | 13.3%               | 5.6%                                        | .0%                      | 21.1%                      |        |
| Nord-<br>gruppe      | Anzahl                 | 0      | 7                            | 11                  | 10                                          | 1                        | 29                         |        |
|                      | in %                   | .0%    | 7.8%                         | 12.2%               | 11.1%                                       | 1.1%                     | 32.2%                      |        |
| Gesamt               | Anzahl                 | 6      | 20                           | 38                  | 25                                          | 1                        | 90                         |        |
|                      | in %                   | 6.7%   | 22.2%                        | 42.2%               | 27.8%                                       | 1.1%                     | 100.0%                     |        |

Tabelle 125: *Korrektheit* des nordosterländischen Sprechers

|                      |                        |        | Westerzgebirgischer Sprecher |       |       |                    |                    | Gesamt |
|----------------------|------------------------|--------|------------------------------|-------|-------|--------------------|--------------------|--------|
|                      |                        |        | sehr<br>gut                  | gut   | egal  | nicht<br>besonders | überhaupt<br>nicht |        |
| Erhebungs-<br>region | Thür. Gruppe           | Anzahl | 0                            | 14    | 2     | 0                  | 0                  | 16     |
|                      |                        | in %   | .0%                          | 11.0% | 1.6%  | .0%                | .0%                | 12.6%  |
|                      | Vogtl.-Erzg.<br>Gruppe | Anzahl | 6                            | 16    | 2     | 2                  | 1                  | 27     |
|                      |                        | in %   | 4.7%                         | 12.6% | 1.6%  | 1.6%               | .8%                | 21.3%  |
|                      | Meißn. Gruppe          | Anzahl | 5                            | 12    | 3     | 6                  | 0                  | 26     |
|                      |                        | in %   | 3.9%                         | 9.4%  | 2.4%  | 4.7%               | .0%                | 20.5%  |
|                      | Lausitz. Gruppe        | Anzahl | 2                            | 12    | 5     | 1                  | 1                  | 21     |
|                      |                        | in %   | 1.6%                         | 9.4%  | 3.9%  | .8%                | .8%                | 16.5%  |
|                      | Osterl. Gruppe         | Anzahl | 2                            | 11    | 2     | 6                  | 2                  | 23     |
|                      |                        | in %   | 1.6%                         | 8.7%  | 1.6%  | 4.7%               | 1.6%               | 18.1%  |
|                      | Nordgruppe             | Anzahl | 1                            | 6     | 3     | 3                  | 1                  | 14     |
|                      |                        | in %   | .8%                          | 4.7%  | 2.4%  | 2.4%               | .8%                | 11.0%  |
| Gesamt               | Anzahl                 | 16     | 71                           | 17    | 18    | 5                  | 127                |        |
|                      | in %                   | 12.6%  | 55.9%                        | 13.4% | 14.2% | 3.9%               | 100.0%             |        |

Tabelle 126: *Gefallen* des westerzgebirgischen Sprechers

|                      |                        |        | Westerzgebirgischer Sprecher |                     |                                        |                     | Gesamt |
|----------------------|------------------------|--------|------------------------------|---------------------|----------------------------------------|---------------------|--------|
|                      |                        |        | stark<br>dialektal           | leicht<br>dialektal | zwischen<br>Hochdeutsch<br>und Dialekt | mehr<br>Hochdeutsch |        |
| Erhebungs-<br>region | Thür. Gruppe           | Anzahl | 7                            | 8                   | 1                                      | 0                   | 16     |
|                      |                        | in %   | 5.5%                         | 6.3%                | .8%                                    | .0%                 | 12.6%  |
|                      | Vogtl.-Erzg.<br>Gruppe | Anzahl | 19                           | 8                   | 0                                      | 0                   | 27     |
|                      |                        | in %   | 15.0%                        | 6.3%                | .0%                                    | .0%                 | 21.3%  |
|                      | Meißn. Gruppe          | Anzahl | 19                           | 4                   | 2                                      | 1                   | 26     |
|                      |                        | in %   | 15.0%                        | 3.1%                | 1.6%                                   | .8%                 | 20.5%  |
|                      | Lausitz. Gruppe        | Anzahl | 15                           | 6                   | 0                                      | 0                   | 21     |
|                      |                        | in %   | 11.8%                        | 4.7%                | .0%                                    | .0%                 | 16.5%  |
|                      | Osterl. Gruppe         | Anzahl | 19                           | 3                   | 0                                      | 1                   | 23     |
|                      |                        | in %   | 15.0%                        | 2.4%                | .0%                                    | .8%                 | 18.1%  |
|                      | Nordgruppe             | Anzahl | 9                            | 5                   | 0                                      | 0                   | 14     |
|                      |                        | in %   | 7.1%                         | 3.9%                | .0%                                    | .0%                 | 11.0%  |
| Gesamt               |                        | Anzahl | 88                           | 34                  | 3                                      | 2                   | 127    |
|                      |                        | in %   | 69.3%                        | 26.8%               | 2.4%                                   | 1.6%                | 100.0% |

Tabelle 127: *Korrektheit* des westerzgebirgischen Sprechers

|                      |                        |        | Vogtländischer Sprecher |       |       |                    |                    | Gesamt |
|----------------------|------------------------|--------|-------------------------|-------|-------|--------------------|--------------------|--------|
|                      |                        |        | sehr<br>gut             | gut   | egal  | nicht<br>besonders | überhaupt<br>nicht |        |
| Erhebungs-<br>region | Thür. Gruppe           | Anzahl | 0                       | 4     | 5     | 2                  | 0                  | 11     |
|                      |                        | in %   | .0%                     | 4.7%  | 5.8%  | 2.3%               | .0%                | 12.8%  |
|                      | Vogtl.-Erzg.<br>Gruppe | Anzahl | 4                       | 10    | 3     | 2                  | 3                  | 22     |
|                      |                        | in %   | 4.7%                    | 11.6% | 3.5%  | 2.3%               | 3.5%               | 25.6%  |
|                      | Meißn. Gruppe          | Anzahl | 2                       | 8     | 8     | 3                  | 0                  | 21     |
|                      |                        | in %   | 2.3%                    | 9.3%  | 9.3%  | 3.5%               | .0%                | 24.4%  |
|                      | Lausitz. Gruppe        | Anzahl | 2                       | 6     | 1     | 1                  | 0                  | 10     |
|                      |                        | in %   | 2.3%                    | 7.0%  | 1.2%  | 1.2%               | .0%                | 11.6%  |
|                      | Osterl. Gruppe         | Anzahl | 0                       | 5     | 3     | 4                  | 1                  | 13     |
|                      |                        | in %   | .0%                     | 5.8%  | 3.5%  | 4.7%               | 1.2%               | 15.1%  |
|                      | Nordgruppe             | Anzahl | 0                       | 4     | 2     | 2                  | 1                  | 9      |
|                      |                        | in %   | .0%                     | 4.7%  | 2.3%  | 2.3%               | 1.2%               | 10.5%  |
| Gesamt               |                        | Anzahl | 8                       | 37    | 22    | 14                 | 5                  | 86     |
|                      |                        | in %   | 9.3%                    | 43.0% | 25.6% | 16.3%              | 5.8%               | 100.0% |

Tabelle 128: *Gefallen* des vogtländischen Sprechers

|                      |                        |        | Vogtländischer Sprecher |                     |                                        |                     | Gesamt |
|----------------------|------------------------|--------|-------------------------|---------------------|----------------------------------------|---------------------|--------|
|                      |                        |        | stark<br>dialektal      | leicht<br>dialektal | zwischen<br>Hochdeutsch<br>und Dialekt | mehr<br>Hochdeutsch |        |
| Erhebungs-<br>region | Thür. Gruppe           | Anzahl | 2                       | 8                   | 1                                      | 0                   | 11     |
|                      |                        | in %   | 2.3%                    | 9.3%                | 1.2%                                   | .0%                 | 12.8%  |
|                      | Vogtl.-Erzg.<br>Gruppe | Anzahl | 10                      | 10                  | 1                                      | 1                   | 22     |
|                      |                        | in %   | 11.6%                   | 11.6%               | 1.2%                                   | 1.2%                | 25.6%  |
|                      | Meißn. Gruppe          | Anzahl | 6                       | 13                  | 2                                      | 0                   | 21     |
|                      |                        | in %   | 7.0%                    | 15.1%               | 2.3%                                   | .0%                 | 24.4%  |
|                      | Lausitz. Gruppe        | Anzahl | 3                       | 6                   | 1                                      | 0                   | 10     |
|                      |                        | in %   | 3.5%                    | 7.0%                | 1.2%                                   | .0%                 | 11.6%  |
|                      | Osterl. Gruppe         | Anzahl | 2                       | 7                   | 3                                      | 1                   | 13     |
|                      |                        | in %   | 2.3%                    | 8.1%                | 3.5%                                   | 1.2%                | 15.1%  |
|                      | Nordgruppe             | Anzahl | 4                       | 3                   | 2                                      | 0                   | 9      |
|                      |                        | in %   | 4.7%                    | 3.5%                | 2.3%                                   | .0%                 | 10.5%  |
| Gesamt               |                        | Anzahl | 27                      | 47                  | 10                                     | 2                   | 86     |
|                      |                        | in %   | 31.4%                   | 54.7%               | 11.6%                                  | 2.3%                | 100.0% |

Tabelle 129: *Korrektheit* des vogtländischen Sprechers

|                      |                        |        | Nordbairischer Sprecher |       |       |                    |                    | Gesamt |
|----------------------|------------------------|--------|-------------------------|-------|-------|--------------------|--------------------|--------|
|                      |                        |        | sehr<br>gut             | gut   | egal  | nicht<br>besonders | überhaupt<br>nicht |        |
| Erhebungs-<br>region | Thür. Gruppe           | Anzahl | 0                       | 2     | 3     | 3                  | 1                  | 9      |
|                      |                        | in %   | .0%                     | 2.9%  | 4.3%  | 4.3%               | 1.4%               | 13.0%  |
|                      | Vogtl.-Erzg.<br>Gruppe | Anzahl | 2                       | 9     | 5     | 2                  | 2                  | 20     |
|                      |                        | in %   | 2.9%                    | 13.0% | 7.2%  | 2.9%               | 2.9%               | 29.0%  |
|                      | Meißn. Gruppe          | Anzahl | 1                       | 3     | 4     | 6                  | 2                  | 16     |
|                      |                        | in %   | 1.4%                    | 4.3%  | 5.8%  | 8.7%               | 2.9%               | 23.2%  |
|                      | Lausitz. Gruppe        | Anzahl | 1                       | 5     | 2     | 1                  | 1                  | 10     |
|                      |                        | in %   | 1.4%                    | 7.2%  | 2.9%  | 1.4%               | 1.4%               | 14.5%  |
|                      | Osterl. Gruppe         | Anzahl | 0                       | 1     | 4     | 5                  | 0                  | 10     |
|                      |                        | in %   | .0%                     | 1.4%  | 5.8%  | 7.2%               | .0%                | 14.5%  |
|                      | Nordgruppe             | Anzahl | 1                       | 1     | 2     | 0                  | 0                  | 4      |
|                      |                        | in %   | 1.4%                    | 1.4%  | 2.9%  | .0%                | .0%                | 5.8%   |
| Gesamt               |                        | Anzahl | 5                       | 21    | 20    | 17                 | 6                  | 69     |
|                      |                        | in %   | 7.2%                    | 30.4% | 29.0% | 24.6%              | 8.7%               | 100.0% |

Tabelle 130: *Gefallen* des nordbairischen Sprechers

|                      |                        |        | Nordbairischer Sprecher |                     |                                        |                     | Gesamt |
|----------------------|------------------------|--------|-------------------------|---------------------|----------------------------------------|---------------------|--------|
|                      |                        |        | stark<br>dialektal      | leicht<br>dialektal | zwischen<br>Hochdeutsch<br>und Dialekt | mehr<br>Hochdeutsch |        |
| Erhebungs-<br>region | Thür. Gruppe           | Anzahl | 6                       | 2                   | 1                                      | 0                   | 9      |
|                      |                        | in %   | 8.8%                    | 2.9%                | 1.5%                                   | .0%                 | 13.2%  |
|                      | Vogtl.-Erzg.<br>Gruppe | Anzahl | 4                       | 11                  | 5                                      | 0                   | 20     |
|                      |                        | in %   | 5.9%                    | 16.2%               | 7.4%                                   | .0%                 | 29.4%  |
|                      | Meißn. Gruppe          | Anzahl | 7                       | 7                   | 1                                      | 0                   | 15     |
|                      |                        | in %   | 10.3%                   | 10.3%               | 1.5%                                   | .0%                 | 22.1%  |
|                      | Lausitz. Gruppe        | Anzahl | 2                       | 6                   | 1                                      | 1                   | 10     |
|                      |                        | in %   | 2.9%                    | 8.8%                | 1.5%                                   | 1.5%                | 14.7%  |
|                      | Osterl. Gruppe         | Anzahl | 5                       | 3                   | 2                                      | 0                   | 10     |
|                      |                        | in %   | 7.4%                    | 4.4%                | 2.9%                                   | .0%                 | 14.7%  |
|                      | Nordgruppe             | Anzahl | 1                       | 2                   | 1                                      | 0                   | 4      |
|                      |                        | in %   | 1.5%                    | 2.9%                | 1.5%                                   | .0%                 | 5.9%   |
|                      | Gesamt                 | Anzahl | 25                      | 31                  | 11                                     | 1                   | 68     |
|                      |                        | in %   | 36.8%                   | 45.6%               | 16.2%                                  | 1.5%                | 100.0% |

Tabelle 131: *Korrektheit* des nordbairischen Sprechers

| SÄCHS. | Anz. | THÜR. | Anz. | VOGT. | Anz. | ANHALT. | Anz. | ERZ. | Anz. |
|--------|------|-------|------|-------|------|---------|------|------|------|
| Dre    | 66   | Weï   | 77   | Pla   | 55   | Hal     | 33   | AnB  | 55   |
| Mei    | 66   | Jen   | 72   | BBr   | 21   | Mer     | 25   | Schn | 54   |
| Pir    | 60   | Ger   | 64   | Aub   | 18   | Bit     | 23   | Joh  | 43   |
| Rie    | 58   | AltU  | 25   | BEls  | 17   | Des     | 20   | Olb  | 28   |
| Fre    | 44   | Gre   | 19   | Tre   | 14   | LuW     | 19   | AltE | 20   |
| Lpz    | 36   | Nau   | 16   | Mar   | 12   | Köt     | 18   | Fre  | 20   |
| Gri    | 32   | Zeï   | 16   | AnB   | 9    | Nau     | 14   | Zwi  | 19   |
| Che    | 24   | Schl  | 13   | Hof   | 9    | Zeï     | 10   | Che  | 17   |
| Gör    | 24   | Pös   | 10   | Gre   | 8    | BDüb    | 5    | Flö  | 14   |
| Bau    | 22   | AnB   | 9    | Joh   | 8    | BDür    | 5    | HoE  | 14   |
| Del    | 22   | Pla   | 9    | Zwi   | 8    | Del     | 5    | Pla  | 14   |
| Osch   | 22   | LuW   | 8    | Schn  | 7    | Que     | 5    | Dip  | 13   |
| Tor    | 22   | Schn  | 8    | Cri   | 6    | Bern    | 4    | Cri  | 7    |
| Wur    | 22   | Mer   | 6    | Fre   | 4    | Els     | 4    | Zit  | 6    |
| Zwi    | 22   | Hal   | 5    | HoE   | 3    | Tor     | 4    | Ger  | 5    |
| Ger    | 20   | Zwi   | 5    | AltE  | 2    | Cott    | 3    | Bau  | 4    |
| Zit    | 18   | Bit   | 4    | Bam   | 2    | Che     | 2    | Mar  | 4    |
| AltU   | 17   | Hof   | 4    | Bay   | 2    | Döb     | 2    | AltU | 3    |
| Döb    | 17   | HoE   | 4    | Che   | 2    | Ger     | 2    | Gre  | 3    |
| Hal    | 17   | Rie   | 4    | Flö   | 2    | Gör     | 2    | Tre  | 3    |
| Hoy    | 17   | Zit   | 4    | Ger   | 2    | Gri     | 2    | BBr  | 2    |
| Bit    | 16   | BBr   | 3    | Weï   | 2    | Hoy     | 2    | Gör  | 2    |
| Pla    | 16   | Bay   | 3    | AltU  | 1    | Jen     | 2    | Gri  | 2    |
| Jen    | 15   | Fre   | 3    | Bur   | 1    | Lpz     | 2    | Hof  | 2    |
| Des    | 14   | Joh   | 3    | Dip   | 1    | Pla     | 2    | Mei  | 2    |
| Mer    | 13   | Wur   | 3    | Olb   | 1    | Rie     | 2    | Mit  | 2    |
| Nau    | 13   | AltE  | 2    | Pös   | 1    | AltU    | 1    | Roch | 2    |

|       |    |      |   |      |   |       |   |       |   |
|-------|----|------|---|------|---|-------|---|-------|---|
| Weï   | 13 | Che  | 2 | Schl | 1 | AnB   | 1 | Seif  | 2 |
| Cri   | 12 | Cri  | 2 | Zeï  | 1 | Bau   | 1 | Aub   | 1 |
| LuW   | 12 | Flö  | 2 |      |   | Bisch | 1 | BEls  | 1 |
| Mit   | 12 | Gör  | 2 |      |   | Cri   | 1 | Bisch | 1 |
| Zeï   | 12 | Gri  | 2 |      |   | Dre   | 1 | Bur   | 1 |
| Köt   | 10 | Mar  | 2 |      |   | Fre   | 1 | Del   | 1 |
| Roch  | 10 | Mei  | 2 |      |   | Joh   | 1 | Köt   | 1 |
| AnB   | 9  | Pir  | 2 |      |   | Lüb   | 1 | LuW   | 1 |
| Schn  | 9  | Cott | 1 |      |   | Osch  | 1 | Seb   | 1 |
| BDüb  | 8  | Els  | 1 |      |   | Pir   | 1 | Zeï   | 1 |
| Cott  | 8  | Hoy  | 1 |      |   | Pös   | 1 |       |   |
| Flö   | 8  | Köt  | 1 |      |   | Senf  | 1 |       |   |
| HoE   | 8  | Mit  | 1 |      |   | Weiss | 1 |       |   |
| Kam   | 8  | Osch | 1 |      |   | Wur   | 1 |       |   |
| Schl  | 8  | Que  | 1 |      |   | Zit   | 1 |       |   |
| Seb   | 8  | Roch | 1 |      |   | Zwi   | 1 |       |   |
| Bisch | 7  | Tor  | 1 |      |   |       |   |       |   |
| Dip   | 7  | Tre  | 1 |      |   |       |   |       |   |
| Els   | 7  |      |   |      |   |       |   |       |   |
| Gre   | 7  |      |   |      |   |       |   |       |   |
| Gro   | 6  |      |   |      |   |       |   |       |   |
| BBr   | 4  |      |   |      |   |       |   |       |   |
| Joh   | 4  |      |   |      |   |       |   |       |   |
| Que   | 4  |      |   |      |   |       |   |       |   |
| BDür  | 3  |      |   |      |   |       |   |       |   |
| Bern  | 3  |      |   |      |   |       |   |       |   |
| Pös   | 3  |      |   |      |   |       |   |       |   |
| AltE  | 2  |      |   |      |   |       |   |       |   |
| Olb   | 2  |      |   |      |   |       |   |       |   |
| Weiss | 2  |      |   |      |   |       |   |       |   |
| Bur   | 1  |      |   |      |   |       |   |       |   |
| Fin   | 1  |      |   |      |   |       |   |       |   |
| Hof   | 1  |      |   |      |   |       |   |       |   |

Tabelle 132: Ortspunkte der stabilen Sprachraumkonzepte SÄCHSISCH, THÜRINGISCH, VOGTLÄNDISCH, ANHALTISCH, ERZGEBIRGISCH und ihre Sortierhäufigkeit

| BERL. | Anz. | DRESD. | Anz. | LAUSITZ. | Anz. | LEIPZ. | Anz. | HALL. | Anz. |
|-------|------|--------|------|----------|------|--------|------|-------|------|
| Cott  | 28   | Pir    | 22   | Gör      | 16   | Gri    | 16   | Hal   | 12   |
| Hoy   | 18   | Dre    | 19   | Bau      | 14   | Lpz    | 15   | Mer   | 11   |
| Els   | 10   | Mei    | 19   | Zit      | 14   | Del    | 10   | Köt   | 8    |
| LuW   | 9    | Dip    | 13   | Hoy      | 9    | Rie    | 9    | Des   | 7    |
| Hal   | 8    | Rie    | 12   | Cott     | 8    | Wur    | 8    | LuW   | 7    |
| Des   | 7    | Kam    | 9    | Kam      | 7    | Döb    | 7    | BDür  | 6    |
| Mer   | 7    | Seb    | 8    | Bisch    | 6    | Hal    | 5    | Bit   | 6    |
| Bit   | 6    | AltE   | 6    | Seb      | 6    | Bit    | 4    | Nau   | 6    |
| Köt   | 6    | Fre    | 6    | Senf     | 5    | Mit    | 4    | Bern  | 5    |
| Gör   | 5    | Döb    | 5    | Weiss    | 4    | Pir    | 4    | Del   | 4    |
| Lüb   | 5    | Gör    | 5    | Spr      | 3    | Roch   | 4    | Que   | 4    |
| Senf  | 5    | Gro    | 5    | Els      | 2    | AltU   | 3    | ZeI   | 4    |
| Weiss | 5    | Bau    | 4    | Lüb      | 2    | Che    | 3    | Tor   | 3    |
| BDüb  | 4    | Del    | 3    | LuW      | 2    | Cri    | 3    | BDüb  | 2    |
| Tor   | 4    | Zit    | 3    | AnB      | 1    | Des    | 3    | Els   | 1    |
| Bern  | 3    | Bit    | 2    | Cri      | 1    | Dre    | 3    | Gör   | 1    |
| Bisch | 2    | Des    | 2    | Fin      | 1    | HoE    | 3    | Jen   | 1    |
| Cri   | 2    | Flö    | 2    | Gro      | 1    | Mei    | 3    | Lpz   | 1    |
| Del   | 2    | HoE    | 2    | Tor      | 1    | Mer    | 3    | Pös   | 1    |
| Fin   | 2    | Hoy    | 2    |          |      | Osch   | 3    |       |      |
| Gro   | 2    | Schn   | 2    |          |      | Tor    | 3    |       |      |
| Nau   | 2    | AnB    | 1    |          |      | BDüb   | 2    |       |      |
| Osch  | 2    | Bisch  | 1    |          |      | Nau    | 2    |       |      |
| Que   | 2    | Che    | 1    |          |      | ZeI    | 2    |       |      |
| Schn  | 2    | Els    | 1    |          |      | Zwi    | 2    |       |      |
| Spr   | 2    | Gri    | 1    |          |      | AnB    | 1    |       |      |
| AltU  | 1    | Lpz    | 1    |          |      | BBr    | 1    |       |      |
| Bau   | 1    | Olb    | 1    |          |      | Bau    | 1    |       |      |
| Che   | 1    | Seif   | 1    |          |      | Bur    | 1    |       |      |
| Döb   | 1    | ZeI    | 1    |          |      | Flö    | 1    |       |      |
| Flö   | 1    |        |      |          |      | Fre    | 1    |       |      |
| Fre   | 1    |        |      |          |      | Ger    | 1    |       |      |
| Ger   | 1    |        |      |          |      | Gro    | 1    |       |      |
| Lpz   | 1    |        |      |          |      | Hoy    | 1    |       |      |
| Mei   | 1    |        |      |          |      | LuW    | 1    |       |      |
| Roch  | 1    |        |      |          |      | Pla    | 1    |       |      |
| Wur   | 1    |        |      |          |      | Schn   | 1    |       |      |
| ZeI   | 1    |        |      |          |      | Seb    | 1    |       |      |
|       |      |        |      |          |      | Zit    | 1    |       |      |

Tabelle 133: Ortspunkte der stabilen Sprachraumkonzepte BERLINISCH, DRESDNERISCH, LAUSITZISCH, LEIPZIGERISCH, HALLISCH und ihre Sortierhäufigkeit

| SÄCHSISCH                         | THÜRINGISCH                                  |
|-----------------------------------|----------------------------------------------|
| Vokale verschlucken               | Farbe der Vokale anders                      |
| Buchstaben verschlucken           | langgezogene Vokale                          |
| Buchstaben verändert              | Buchstaben verschlucken                      |
| bestimmte Laute                   | viel [o]                                     |
| weiche Buchstaben                 | ar/er > a(o)                                 |
| keine harten Laute                | e > a                                        |
| Konsonanten weich                 | rollt etwas                                  |
| ai > e                            | klingt nicht so sächsisch in den konsonanten |
| a > ou                            | j > sch                                      |
| kein [ö]                          | rollendes R                                  |
| kein [k]                          | schönes rollendes R                          |
| kein [p]                          | andere Vokale                                |
| p. t. k weich                     | bestimmte Tonlage                            |
| t > d                             | melodisch                                    |
| k > g                             | anderer Klang                                |
| sch-Laute                         | Stimme hell                                  |
| ch > sch                          | Sächsisch ist im Tonfall breiter             |
| Sprachmelodie                     | Singen                                       |
| sehr melodiös                     | letzte Silbe hochgezogen                     |
| klingt anders                     | klingt genauer                               |
| Stimme eher hoch angesetzt        | Stimme ordentlich                            |
| Leiern                            | bequeme Aussprache                           |
| nicht so starker Sing-Sang        | Silben besser ausgesprochen                  |
| Sing-Sang                         | sprechen deutlich                            |
| Betonung anders                   | klare Aussprache                             |
| Wortausdrucksweise                | verständlich                                 |
| ohne Modulation                   | alles ein Brei                               |
| Unterkiefer runter                | zusammengezogen                              |
| von unten aus dem Hals gesprochen | verschlucken viel                            |
| Stimme langgezogen                | nicht verkürzt                               |
| zerrig                            | nuscheln                                     |
| ziemlich deutlich                 | Endungen von Verben weg                      |
| zusammengezogen                   | bestimmte Begriffe                           |
| gedehnt                           | gälle (nicht wahr?)                          |
| gemehrt                           | gäll (nicht wahr?)                           |
| Plärren                           | gä (nicht wahr?)                             |
| grammatische Wendungen            | no (ja)                                      |
| -en > -ne                         | Servus (Tschüss)                             |
| "Wir gehen beim Doktor."          | Bemme (Scheibe Brot)                         |
| Satzformung                       | joa (ja)                                     |
| typische Wörter                   | bissl (bisschen)                             |
| nor (ja)                          | Kle:ße (Klöße)                               |
| nu (ja)                           | Schacke (Jacke)                              |
| Mutzschekiepchen (Marienkäfer)    | Schogurt (Jogurt)                            |
| Bemme (Scheibe Brot)              | ganz normal                                  |
| Brätschen (Brötchen)              | verwechselbar mit Sächsisch                  |
| nee (nein)                        | nichts Besonderes                            |
| ni (nicht)                        | gaatzschen weniger                           |
| nuff (hinauf)                     | viele Leute auch von außerhalb               |
| Laibzsch                          | nicht hart                                   |

|                                           |                                                   |
|-------------------------------------------|---------------------------------------------------|
| heißer Gaffee                             | dumpfer                                           |
| Birne (Pirna)                             | wärmer                                            |
| ämal (einmal)                             | nicht so streng                                   |
| Gaffee                                    | vertraut                                          |
| isch                                      | erkennt man                                       |
| jeloofn                                   | wie Jens Weißflog                                 |
| janz                                      | die eigene Sprechweise                            |
| ju:t                                      | Gersche Fettguschen                               |
| Draschden                                 | die haben Komplexe                                |
| Wurscht                                   | angenehm                                          |
| meener                                    | dreckig                                           |
| ganz normal                               | fauler Dialekt                                    |
| in sich verschieden                       | freundlich                                        |
| sehr weich                                | gemütlich                                         |
| breit                                     | liebenswert                                       |
| langsam                                   | klingt nett                                       |
| deftig                                    | verbindlich                                       |
| parodiert als DDR-Sprache                 | ähnelt dem Hochdeutschen                          |
| erkennt man                               | kein richtiger Dialekt                            |
| schwer erkennbar                          | kaum Dialekt                                      |
| wie Tom Pauls                             | relativ Hochdeutsch                               |
| klingt heimatisch                         | manchmal Hang zum Bayerischen                     |
| angenehme Sprechweise                     | manchmal in bestimmten Wörtern Richtung Bayerisch |
| nicht dumm                                | ähnlich wie Erzgebirgisch.                        |
| klingt als wäre jemand blöde              | bisschen wie Hessisch                             |
| klingt ungebildet                         | ähnlich wie Sächsisch                             |
| gemütlich                                 | sächseln etwas                                    |
| gesetzt                                   | sächsischer Einschlag                             |
| grauenvoll                                | Mischmasch von Thüringisch und Sächsisch          |
| nicht hässlich                            | Randzone Sachsen                                  |
| liebevoll                                 | Übergangsgebiet                                   |
| lustige Mundart                           | Mischmasch                                        |
| niedlich                                  | vermantscht                                       |
| putzig                                    |                                                   |
| ganz schlimm                              |                                                   |
| trottelig                                 |                                                   |
| auf Dörfern mehr Dialekt als in der Stadt |                                                   |
| Durchmischung mit Hochdeutsch             |                                                   |
| steht der Aussprachenorm sehr nahe        |                                                   |
| hochdeutscher Einfluss                    |                                                   |
| kein gutes Deutsch                        |                                                   |
| nicht so wie in Chemnitz                  |                                                   |
| nicht so wie in Leipzig                   |                                                   |
| Hochsachsenburg                           |                                                   |
| Ursprung vom Sächsischen                  |                                                   |
| Großraum Dresden                          |                                                   |
| Staffellandschaft                         |                                                   |

Tabelle 134: Assoziierte Einzelmerkmale der stabilen Sprachraumkonzepte SÄCHSISCH und THÜRINGISCH



| VOGTLÄNDISCH                  | ANHALTINISCH                         |
|-------------------------------|--------------------------------------|
| viele a-Töne                  | Vokale breit gezogen                 |
| a-Laute anders                | Vokale verändert                     |
| o > u                         | kurze Selbstlaute                    |
| viele Vokale zu [u]           | stimmloses [e]                       |
| ai > e                        | p > b                                |
| ai > a                        | t > d                                |
| viel [u]                      | k > g                                |
| a > oa                        | [je]                                 |
| [sch] deutlicher              | nicht so ausgeprägtes [j] wie Dessau |
| rollendes R                   | g > j                                |
| pl > pf (Pflumpfe)            | weiches [sch] statt [g]              |
| melodisch                     | andere Stimmlage                     |
| andere Sprachmelodie          | Satzmelodie singend                  |
| singen anders                 | Sing-Sang                            |
| am Satzende hoch              | Betonung auf [a]                     |
| weicher Ton                   | andere Aussprache                    |
| Geleiere                      | sprechen deutlich                    |
| Singen                        | klar                                 |
| Betonung anders               | alles hängt zusammen                 |
| kehlig                        | langgezogene Aussprache              |
| unsauber gesprochen           | gedehnt                              |
| verständlicher                | klingt abgehackt                     |
| schwer verständlich           | ziehen einige Worte zusammen         |
| langgezogene Aussprache       | 3./4. Fall vertauschen               |
| -l angehängt                  | gib mich mal                         |
| bestimmte Begriffe            | Satzstellung                         |
| bestimmte Phrasen             | andere Begriffe                      |
| goa (ja)                      | wa (nicht wahr?)                     |
| nor (ja)                      | wa-Anhang                            |
| Holzschnitzen                 | na (ja)                              |
| na (nein)                     | nu (ja)                              |
| nät (nicht)                   | smeiumt (es regnet)                  |
| nibor (herüber)               | Scheijks (abfällig für junger Mann)  |
| nauf (hinauf)                 | Ische (abfällig für junge Frau)      |
| nai (hinein)                  | gä (nicht wahr?)                     |
| Baimer (Bäume)                | nee (nein)                           |
| ran (rein)                    | jutwor (gut nicht wahr?)             |
| Bam (Baum)                    | Batt (Bad)                           |
| i:ch                          | gemajetze (gehen wir jetzt)          |
| awäng (wenig)                 | dat                                  |
| eigen                         | ick                                  |
| anders als Klingenthal        | Droscherie                           |
| eigene Mundart                | zu:ch (zug)                          |
| in sich verschieden           | ejal                                 |
| gaatzschen                    | jehen (gehen)                        |
| bisschen härter als Sächsisch | Machdeburch (Magdeburg)              |
| breit                         | jejangen                             |
| Selbstlaute anders            | jib                                  |
| warm                          | ju:t                                 |
| wabrig                        | Weltunterjang                        |
| sehr lieblich                 | etwas eigenes                        |
| gähmig                        | klingt weich                         |

|                                                 |                                                                                  |
|-------------------------------------------------|----------------------------------------------------------------------------------|
| erkennt man                                     | Aus Halle kommen die ganzen Dummen her und in Bitterfeld werden sie hergestellt. |
| wie Großmutter                                  | erkennt man an Wortwahl                                                          |
| anders                                          | fast Hochdeutsch                                                                 |
| angenehm                                        | gutes Deutsch                                                                    |
| freundlich                                      | leichter Akzent                                                                  |
| klings besser                                   | Anhaltinisches Platt                                                             |
| liebenswert                                     | spezielle Ausprägung des Anhaltinischen                                          |
| spezielles Sächsisch                            | anders als in Leipzig                                                            |
| verwandt mit Westsachsen                        | Richtung Leipzig                                                                 |
| zwischen Sächsisch und Bayerisch                | ähnlich wie in Berlin                                                            |
| nah am Bayerischen                              | bisschen Berlinerisch                                                            |
| sehr dem Fränkischen verwandt                   | verwechselt man manchmal mit Berlinisch                                          |
| Mischung zum Fränkischen                        | Hallisch                                                                         |
| sächsische und fränkische Einflüsse             | Hallensisch                                                                      |
| Richtung Erzgebirge                             | Großraum Halle                                                                   |
| ähnlich wie Erzgebirgisch                       | bisschen Sächsisch                                                               |
| ähnlich wie Erzgebirgisch aber anderer Klang    | ähnlich wie Sächsisch                                                            |
| ähnlich wie Erzgebirgisch aber nicht so singend | Mischung aus Berlinern und Sächsisch                                             |
| sächsischer als Erzgebirgisch                   | nah am Thüringischen                                                             |
| Mischung aus Thüringisch und Sächsisch          | Grenzregion                                                                      |
|                                                 | Staffellandschaft                                                                |
|                                                 | zwischen weich und hart (= zwischen Sächsisch und Berlinisch)                    |

Tabelle 135: Assoziierte Einzelmerkmale der stabilen Sprachraumkonzepte VOGTLÄNDISCH und ANHALTINISCH

| ERZGEBIRGISCH                                                       | BERLINISCH                                                  |
|---------------------------------------------------------------------|-------------------------------------------------------------|
| Vokale anders                                                       | sprechen schneller                                          |
| viel a und o                                                        | reden drauflos                                              |
| langes [a]                                                          | Tonfall                                                     |
| e > a                                                               | mir/mich verwechseln                                        |
| a > o                                                               | wa-ey (nicht wahr?)                                         |
| o > u                                                               | Stulle (Scheibe Brot)                                       |
| drehen Buchstaben                                                   | Schrippe (Brötchen)                                         |
| rollendes R                                                         | dette (das dort)                                            |
| Tonfall anders                                                      | dörfst (darfst)                                             |
| reden hoch (Sprechlage)                                             | ke:ne                                                       |
| Singen                                                              | wat                                                         |
| ganz doll singend                                                   | ick                                                         |
| singen ab Klingenthal                                               | icken                                                       |
| Betonung                                                            | icke                                                        |
| andere Aussprache                                                   | kiek ma (schau mal)                                         |
| sprechen deutlich                                                   | fremd                                                       |
| verständlich                                                        | härter                                                      |
| manchmal unverständlich                                             | robust                                                      |
| schlecht verständlich                                               | hört man eben raus                                          |
| unverständlich                                                      | Schandschnauzen                                             |
| verkürzte Aussprache                                                | sorben mit dabei                                            |
| Endungen anders                                                     | reudiger                                                    |
| Endungen verschlucken                                               | Hochdeutsch                                                 |
| keine Endungen                                                      | kein Hochdeutsch                                            |
| Abkürzungen                                                         | frecher                                                     |
| besondere Worte                                                     | richtung Berliner                                           |
| Redewendungen anders                                                | leicht Berlinerisch                                         |
| bestimmte Phrasen                                                   | ähnlich wie in Berlin                                       |
| fainet (nein)                                                       | kein Berlinerisch                                           |
| Glück auf                                                           | zwischen Hochdeutsch und Berlin                             |
| Behndrelade (Fahrrad)                                               | Brandenburgisch                                             |
| O Arzgebirg wie bist du schi.                                       | Richtung Brandenburg                                        |
| Wo de Hos'n Hus'n has'n und de Hus'n<br>Hos'n sei do sei mir drham. | Sachsen                                                     |
| Rachelmannel                                                        | kein Sächsisch                                              |
| Avdentslieder                                                       | Übergang zwischen Sächsisch und Hochdeutsch                 |
| bekannte Lieder                                                     | kein Thüringisch                                            |
| Weihnachten                                                         | Lausitz                                                     |
| nät (nicht)                                                         | Niederlausitz                                               |
| ni (nicht)                                                          | Großraum Cottbus                                            |
| o:ch (auch)                                                         | nördlich von Sachsen                                        |
| Bam (Baum)                                                          | Mischung Anhaltinisch-Sächsisch-Brandenburgisch             |
| Bamer (Bäume)                                                       | Mittelding zwischen Dresdner Sächsisch und etwas<br>eigenes |
| a (auch)                                                            |                                                             |
| Ma (Mann)                                                           |                                                             |
| Marjkt                                                              |                                                             |

|                                                   |
|---------------------------------------------------|
| Gung (Junge)                                      |
| Mad (Mädchen)                                     |
| Hamit (Heimat)                                    |
| Hus (Hose)                                        |
| dahemm (zu Hause)                                 |
| Mai Hus un mai Gag. (Meine Hose und meine Jacke.) |
| mai Frau (meine Frau)                             |
| eigen                                             |
| etwas anders als Thüringisch                      |
| eigene Mundart                                    |
| in sich verschieden                               |
| bisschen härter als Sächsisch                     |
| extremer                                          |
| vertrauensvoll                                    |
| traditionell                                      |
| erkennt man sofort                                |
| anders                                            |
| Regionalstolz                                     |
| angenehmer Dialekt                                |
| anziehend                                         |
| gemütlich                                         |
| gemütliche Aussprache                             |
| lieblich                                          |
| ähnlich wie in Dresden                            |
| erzgebirgisches Sächsisch                         |
| Richtung Erzgebirge                               |
| Extrasprache gehört aber zum Sächsischen          |
| verwandt mit Sächsisch                            |
| ähnlich wie Sächsisch                             |
| zwischen Sächsisch und Erzgebirgisch              |
| Einfluss von Sächsisch und Vogtländisch           |
| ähnlich wie Vogtländisch aber eigenständig        |
| Thüringisch                                       |
| mehr ins Fränkische                               |
| Lausitzer Sächsisch                               |
| Bergdialekt                                       |

Tabelle 136: Assoziierte Einzelmerkmale der stabilen Sprachraumkonzepte ERZGEBIRGISCH und BERLINISCH

| LAUSITZISCH                                      | LEIPZIGERISCH                                  |
|--------------------------------------------------|------------------------------------------------|
| ö > e                                            | Vokale offen                                   |
| ü > i                                            | a > o                                          |
| rollendes R                                      | können kein [a] sprechen                       |
| leichtes rollendes R                             | können kein [o] sprechen                       |
| Edelroller                                       | Konsonanten weich                              |
| bestimmte Melodie                                | weiches [g]                                    |
| Betonung anders                                  | t > d                                          |
| kehlig                                           | k > g                                          |
| kehliges Aussprache                              | ch > sch                                       |
| Zusammenziehen                                   | Sprachmelodie geht nicht hoch                  |
| -la Endungen                                     | nicht so sympatischer Gesang wie in Dresden    |
| viele Verkleinerungsformen                       | Singen                                         |
| andere Begriffe                                  | Unterkiefer vor und rauslaufen lassen          |
| Ratt (Ra:d)                                      | bequemes Sprechen                              |
| klings wie Englisch                              | alles langgezogen                              |
| ganz komischer Dialekt                           | nuscheln                                       |
| anders als in Dresden                            | Endungen stark verschluckt                     |
| etwas eigenes                                    | verkürzte Worte                                |
| harte Aussprache                                 | eigene Begriffe                                |
| gemütlich                                        | nä (nicht wahr?)                               |
| niederschlesisches Lausitzisch                   | no (ja)                                        |
| Lausitzisch = Hochdeutsch vermischt mit Sorbisch | "Ein Kessel Buntes"                            |
| Schlesischer Einfluss                            | newar (nicht wahr?)                            |
| Sorbischer Einfluss                              | o:ch (auch)                                    |
| Oberlausitz                                      | gön (können)                                   |
| südlich von Berlin                               | isch                                           |
|                                                  | mir (wir)                                      |
|                                                  | anders als in Chemnitz                         |
|                                                  | anders als in Dresden                          |
|                                                  | hartes Sächsisch                               |
|                                                  | breite Aussprache                              |
|                                                  | breites Sächsisch                              |
|                                                  | erkennt man                                    |
|                                                  | anders                                         |
|                                                  | Richtung Leipzig wird mehr gesungen            |
|                                                  | Ursächsisch                                    |
|                                                  | gebirgig                                       |
|                                                  | Staffellandschaft zwischen Dresden und Leipzig |

Tabelle 137: Einzelmerkmale der stabilen Sprachraumkonzepte LAUSITZISCH und ERZGEBIRGISCH

|                    |         | Erhebungsregion | Altersgruppe | Geschlecht |
|--------------------|---------|-----------------|--------------|------------|
| N                  | Gültig  | 93              | 93           | 93         |
|                    | Fehlend | 0               | 0            | 0          |
| Mittelwert         |         | 3.60            | 1.97         | 1.60       |
| Median             |         | 4.00            | 2.00         | 2.00       |
| Modus              |         | 6               | 2            | 2          |
| Standardabweichung |         | 1.831           | .786         | .492       |
| Varianz            |         | 3.351           | .619         | .242       |
| Spannweite         |         | 5               | 2            | 1          |
| Minimum            |         | 1               | 1            | 1          |
| Maximum            |         | 6               | 3            | 2          |

Tabelle 138: Relative Grundgesamtheiten der Bedeutungsdimension für das Sprachraumkonzept SÄCHSISCH<sup>25</sup>

|        |                       | Häufigkeit | Prozent | Gültige<br>Prozente | Kumulierte<br>Prozente |
|--------|-----------------------|------------|---------|---------------------|------------------------|
| Gültig | Thüringische Gruppe   | 18         | 19.4    | 19.4                | 19.4                   |
|        | Vogtl.-Erzgeb. Gruppe | 14         | 15.1    | 15.1                | 34.4                   |
|        | Meißnische Gruppe     | 11         | 11.8    | 11.8                | 46.2                   |
|        | Lausitzische Gruppe   | 13         | 14.0    | 14.0                | 60.2                   |
|        | Osterländische Gruppe | 18         | 19.4    | 19.4                | 79.6                   |
|        | Nordgruppe            | 19         | 20.4    | 20.4                | 100.0                  |
|        | Gesamt                | 93         | 100.0   | 100.0               |                        |

Tabelle 139: Verteilung der relativen Grundgesamtheit auf die Befragungsgruppen

|        |                 | Häufigkeit | Prozent | Gültige<br>Prozente | Kumulierte<br>Prozente |
|--------|-----------------|------------|---------|---------------------|------------------------|
| Gültig | 19 bis 31 Jahre | 30         | 32.3    | 32.3                | 32.3                   |
|        | 32 bis 55 Jahre | 36         | 38.7    | 38.7                | 71.0                   |
|        | 56 bis 84 Jahre | 27         | 29.0    | 29.0                | 100.0                  |
|        | Gesamt          | 93         | 100.0   | 100.0               |                        |

Tabelle 140: Verteilung der relativen Grundgesamtheit auf die Altersgruppen

<sup>25</sup> Berücksichtigt werden in diesem Abschnitt nur die Probanden, die einen Stapel mit dem Sprachraumkonzept SÄCHSISCH repräsentiert haben.

|                 | Häufigkeit | Prozent | Gültige<br>Prozente | Kumulierte<br>Prozente |
|-----------------|------------|---------|---------------------|------------------------|
| Gültig männlich | 37         | 39.8    | 39.8                | 39.8                   |
| weiblich        | 56         | 60.2    | 60.2                | 100.0                  |
| Gesamt          | 93         | 100.0   | 100.0               |                        |

Tabelle 141: Verteilung der relativen Grundgesamtheit auf das Geschlecht der Befragten

|                           | Häufigkeit | Prozent | Gültige<br>Prozente | Kumulierte<br>Prozente |
|---------------------------|------------|---------|---------------------|------------------------|
| Gültig Realschule         | 5          | 5.4     | 5.4                 | 5.4                    |
| POS/EOS                   | 1          | 1.1     | 1.1                 | 6.5                    |
| Hauptschule               | 2          | 2.2     | 2.2                 | 8.6                    |
| Abitur/Fachabitur         | 15         | 16.1    | 16.1                | 24.7                   |
| Fachschule/Facharbeiter   | 24         | 25.8    | 25.8                | 50.5                   |
| Hochschule/Fachhochschule | 40         | 43.0    | 43.0                | 93.5                   |
| Promotion                 | 1          | 1.1     | 1.1                 | 94.6                   |
| keine Angabe              | 5          | 5.4     | 5.4                 | 100.0                  |
| Gesamt                    | 93         | 100.0   | 100.0               |                        |

Tabelle 142: Verteilung der relativen Grundgesamtheit auf den Bildungsgrad

|                      | Häufigkeit | Prozent | Gültige<br>Prozente | Kumulierte<br>Prozente |
|----------------------|------------|---------|---------------------|------------------------|
| Gültig in Ausbildung | 15         | 16.1    | 16.1                | 16.1                   |
| Arbeiter/Handwerker  | 4          | 4.3     | 4.3                 | 20.4                   |
| Angestellter         | 35         | 37.6    | 37.6                | 58.1                   |
| Selbstständig        | 9          | 9.7     | 9.7                 | 67.7                   |
| Beamter              | 3          | 3.2     | 3.2                 | 71.0                   |
| Rentner              | 22         | 23.7    | 23.7                | 94.6                   |
| nicht erwerbstätig   | 5          | 5.4     | 5.4                 | 100.0                  |
| Gesamt               | 93         | 100.0   | 100.0               |                        |

Tabelle 143: Verteilung der Grundgesamtheit auf die ausgeübte Tätigkeit

|                       | Eigenbewertung |     |      |                 | Gesamt |
|-----------------------|----------------|-----|------|-----------------|--------|
|                       | sehr gut       | gut | egal | nicht besonders |        |
| Thüringische Gruppe   | 1              | 11  | 3    | 3               | 18     |
| Vogtl.-Erzgeb. Gruppe | 2              | 5   | 3    | 4               | 14     |
| Meißnische Gruppe     | 0              | 6   | 4    | 1               | 11     |
| Lausitzische Gruppe   | 1              | 8   | 3    | 1               | 13     |
| Osterländische Gruppe | 0              | 9   | 3    | 6               | 18     |
| Nordgruppe            | 2              | 13  | 2    | 2               | 19     |
| Gesamt                | 6              | 52  | 18   | 17              | 93     |

Tabelle 144: Bewertung der eigenen Sprechweise

|                       | vermutete Fremdbewertung I<br>(Bundesland) |     |      |                 |                 | Gesamt |
|-----------------------|--------------------------------------------|-----|------|-----------------|-----------------|--------|
|                       | sehr gut                                   | gut | egal | nicht besonders | überhaupt nicht |        |
| Thüringische Gruppe   | 0                                          | 5   | 8    | 5               | 0               | 18     |
| Vogtl.-Erzgeb. Gruppe | 0                                          | 5   | 4    | 4               | 1               | 14     |
| Meißnische Gruppe     | 0                                          | 4   | 2    | 5               | 0               | 11     |
| Lausitzische Gruppe   | 0                                          | 8   | 4    | 1               | 0               | 13     |
| Osterländische Gruppe | 0                                          | 1   | 6    | <b>11</b>       | 0               | 18     |
| Nordgruppe            | 1                                          | 5   | 5    | <b>8</b>        | 0               | 19     |
| Gesamt                | 1                                          | 28  | 29   | 34              | 1               | 93     |

Tabelle 145: Vermutete Fremdbewertung der eigenen Sprechweise durch Personen außerhalb der jeweiligen Bundesländer der Befragten

|                       | vermutete Fremdbewertung II<br>(Region) |     |      |                 |                 | Gesamt |
|-----------------------|-----------------------------------------|-----|------|-----------------|-----------------|--------|
|                       | sehr gut                                | gut | egal | nicht besonders | überhaupt nicht |        |
| Thüringische Gruppe   | 0                                       | 8   | 10   | 0               | 0               | 18     |
| Vogtl.-Erzgeb. Gruppe | 0                                       | 2   | 8    | 3               | 1               | 14     |
| Meißnische Gruppe     | 0                                       | 6   | 4    | 1               | 0               | 11     |
| Lausitzische Gruppe   | 1                                       | 8   | 4    | 0               | 0               | 13     |
| Osterländische Gruppe | 0                                       | 7   | 10   | 1               | 0               | 18     |
| Nordgruppe            | 0                                       | 8   | 10   | 1               | 0               | 19     |
| Gesamt                | 1                                       | 39  | 46   | 6               | 1               | 93     |

Tabelle 146: Vermutete Fremdbewertung der eigenen Sprechweise durch Personen außerhalb der jeweiligen näheren Umgebung der Befragten



|                               |                         | vermutete<br>Fremd-<br>bewertung<br>I | vermutete<br>Fremd-<br>bewertung<br>II |
|-------------------------------|-------------------------|---------------------------------------|----------------------------------------|
| vermutete<br>Fremdbewertung I | Korrelationskoeffizient | 1.000                                 | <b>.149</b>                            |
|                               | Sig. (2-seitig)         | .                                     | .115                                   |
|                               | N                       | 93                                    | 93                                     |

Tabelle 147: Korrelationen der vermuteten Fremdbewertungen I und II (nach Kendall-Tau)

|                |                 | vermutete Fremdbewertung I<br>(Bundesland) |     |      |                    |                    | Gesamt |
|----------------|-----------------|--------------------------------------------|-----|------|--------------------|--------------------|--------|
|                |                 | sehr<br>gut                                | gut | egal | nicht<br>besonders | überhaupt<br>nicht |        |
| Eigenbewertung | sehr gut        | 0                                          | 3   | 2    | 1                  | 0                  | 6      |
|                | gut             | 1                                          | 18  | 14   | <b>19</b>          | 0                  | 52     |
|                | egal            | 0                                          | 3   | 8    | 6                  | 1                  | 18     |
|                | nicht besonders | 0                                          | 4   | 5    | 8                  | 0                  | 17     |
| Gesamt         |                 | 1                                          | 28  | 29   | 34                 | 1                  | 93     |

Tabelle 148: Kreuztabelle der Eigenbewertung und vermuteter Fremdbewertung I

|                |                 | vermutete Fremdbewertung II<br>(Region) |     |      |                    |                    | Gesamt |
|----------------|-----------------|-----------------------------------------|-----|------|--------------------|--------------------|--------|
|                |                 | sehr<br>gut                             | gut | egal | nicht<br>besonders | überhaupt<br>nicht |        |
| Eigenbewertung | sehr gut        | 0                                       | 2   | 4    | 0                  | 0                  | 6      |
|                | gut             | 1                                       | 27  | 21   | 3                  | 0                  | 52     |
|                | egal            | 0                                       | 5   | 12   | 0                  | 1                  | 18     |
|                | nicht besonders | 0                                       | 5   | 9    | 3                  | 0                  | 17     |
| Gesamt         |                 | 1                                       | 39  | 46   | 6                  | 1                  | 93     |

Tabelle 149: Kreuztabelle der Eigenbewertung und vermuteter Fremdbewertung II

|                                                                                                                 | Faktoren    |             |             |             |             |
|-----------------------------------------------------------------------------------------------------------------|-------------|-------------|-------------|-------------|-------------|
|                                                                                                                 | 1           | 2           | 3           | 4           | 5           |
| Ich höre meinen Heimatdialekt gern.                                                                             | -.009       | <b>.732</b> | -.035       | .358        | .020        |
| Es gibt Situationen, in denen Dialektsprechen unpassend ist.                                                    | <b>.496</b> | .059        | -.011       | -.253       | -.151       |
| Ich finde es wichtig, Hochdeutsch sprechen zu können.                                                           | <b>.772</b> | .034        | -.030       | -.029       | .275        |
| Ich bin stolz auf die Art wie ich spreche.                                                                      | .021        | <b>.514</b> | -.404       | .211        | -.229       |
| Der eigene Dialekt sollte gepflegt und an die Kinder weitergegeben werden.                                      | .027        | <b>.844</b> | -.110       | .023        | -.022       |
| Die Dialekte werden aussterben.                                                                                 | -.102       | -.059       | .049        | -.020       | <b>.836</b> |
| Ich finde es wichtig, dass in der Schule auch Dialektkunde (sprachlich und kulturell) vermittelt wird.          | .161        | <b>.564</b> | -.069       | -.185       | .020        |
| Ich finde es wichtig, dass die Kinder in der Schule lernen, Hochdeutsch zu sprechen.                            | <b>.815</b> | .037        | .062        | -.053       | -.091       |
| Ich wurde schon oft wegen meines Dialekts gehänselt.                                                            | -.076       | -.061       | <b>.782</b> | .152        | .128        |
| Es spielt für mich keine Rolle, ob jemand Dialekt spricht.                                                      | .131        | .091        | .118        | <b>.667</b> | .005        |
| Dialektsprecher sind meist nicht so gebildet.                                                                   | .122        | -.025       | <b>.594</b> | -.389       | .089        |
| Wenn ich mit jemandem spreche, der meinen Dialekt nicht spricht, dann versuche ich, mehr Hochdeutsch zu reden.  | <b>.611</b> | .107        | .107        | .372        | -.120       |
| Wenn ich rede, versuche ich nicht so stark im Dialekt zu sprechen.                                              | <b>.653</b> | .057        | -.009       | .075        | .349        |
| Mich stört es, wenn jemand im Dialekt spricht.                                                                  | .213        | -.004       | .140        | -.589       | <b>.369</b> |
| Wenn ich merke, dass jemand nicht gut Deutsch kann, versuche ich deutlicher (d.h. weniger Dialekt) zu sprechen. | <b>.663</b> | .100        | .044        | .185        | -.220       |

|                                                                                                     |       |             |             |             |       |
|-----------------------------------------------------------------------------------------------------|-------|-------------|-------------|-------------|-------|
| Ich hatte schon oft Nachteile wegen meines Dialekts.                                                | .062  | -.038       | <b>.789</b> | .202        | -.147 |
| Ich höre neben meinem eigenen Dialekt auch gern andere Dialekte, z.B. Schwäbisch, Platt, Bayerisch. | .159  | .336        | .024        | <b>.572</b> | .165  |
| Ich schäme mich wegen meines Dialekts.                                                              | .242  | -.372       | <b>.421</b> | -.361       | .156  |
| Die Stärke des Dialekts sagt etwas über die Persönlichkeit des Sprechers aus.                       | -.039 | <b>.428</b> | <b>.423</b> | -.390       | -.269 |
| Wenn ich meinen Heimatdialekt höre, fühle ich mich zu Hause.                                        | .176  | <b>.607</b> | .154        | .269        | -.021 |

Extraktionsmethode: Hauptkomponentenanalyse.

Rotationsmethode: Varimax mit Kaiser-Normalisierung.

a Die Rotation ist in 6 Iterationen konvergiert.

Tabelle 150: Faktorenladung der Haltungen zum Dialekt allgemein

|                     |                 | dialektaffin             |                            |                          |                             | Gesamt |
|---------------------|-----------------|--------------------------|----------------------------|--------------------------|-----------------------------|--------|
|                     |                 | nicht<br>aus-<br>geprägt | schwach<br>aus-<br>geprägt | stark<br>aus-<br>geprägt | sehr<br>stark<br>ausgeprägt |        |
| Eigen-<br>bewertung | sehr gut        | 2                        | 0                          | 1                        | 3                           | 6      |
|                     | gut             | 8                        | 10                         | 19                       | 15                          | 52     |
|                     | egal            | 5                        | 8                          | 2                        | 3                           | 18     |
|                     | nicht besonders | 8                        | 5                          | 2                        | 2                           | 17     |
| Gesamt              |                 | 23                       | 23                         | 24                       | 23                          | 93     |

Tabelle 151: Kreuztabelle der Eigenbewertungen und der Ausprägung einer dialektaffinen Haltung

|                                    | Wert      | df | Asymptotische<br>Signifikanz<br>(2-seitig) |
|------------------------------------|-----------|----|--------------------------------------------|
| Chi-Quadrat nach Pearson           | 19.464(a) | 9  | .022                                       |
| Likelihood-Quotient                | 20.463    | 9  | .015                                       |
| Zusammenhang linear-<br>mit-linear | 9.861     | 1  | .002                                       |
| Anzahl der gültigen Fälle          | 93        |    |                                            |

a 12 Zellen (75.0%) haben eine erwartete Häufigkeit kleiner 5. Die minimale erwartete Häufigkeit ist 1.48.

Tabelle 152: Zusammenhang zwischen Eigenbewertung und der Ausprägung einer dialektaffinen Haltung

|                                     |                 | soziale Abwertung        |                            |                          |                             | Gesamt |
|-------------------------------------|-----------------|--------------------------|----------------------------|--------------------------|-----------------------------|--------|
|                                     |                 | nicht<br>aus-<br>geprägt | schwach<br>aus-<br>geprägt | stark<br>aus-<br>geprägt | sehr<br>stark<br>ausgeprägt |        |
| Vermutete<br>Fremd-<br>bewertung II | sehr gut        | 1                        | 0                          | 0                        | 0                           | 1      |
|                                     | gut             | 14                       | 10                         | 8                        | 7                           | 39     |
|                                     | egal            | 7                        | 13                         | 16                       | 10                          | 46     |
|                                     | nicht besonders | 1                        | 0                          | 0                        | 5                           | 6      |
|                                     | überhaupt nicht | 0                        | 0                          | 0                        | 1                           | 1      |
| Gesamt                              |                 | 23                       | 23                         | 24                       | 23                          | 93     |

Tabelle 153: Kreuztabelle der vermuteten Fremdbewertung I und der Ausprägung einer sozialen Abwertung

|                                    | Wert      | df | Asymptotische<br>Signifikanz (2-<br>seitig) |
|------------------------------------|-----------|----|---------------------------------------------|
| Chi-Quadrat nach Pearson           | 24.255(a) | 12 | .019                                        |
| Likelihood-Quotient                | 23.584    | 12 | .023                                        |
| Zusammenhang linear-<br>mit-linear | 10.839    | 1  | .001                                        |
| Anzahl der gültigen Fälle          | 93        |    |                                             |

a 12 Zellen (60.0%) haben eine erwartete Häufigkeit kleiner 5. Die minimale erwartete Häufigkeit ist .25.

Tabelle 154: Zusammenhang zwischen vermuteter Fremdbewertung I und der Ausprägung einer sozialen Abwertung

| Sprechen Sie Sächsisch? |                            | Häufigkeit | Prozent | Gültige<br>Prozente | Kumulierte<br>Prozente |
|-------------------------|----------------------------|------------|---------|---------------------|------------------------|
| Gültig                  | Ja, sehr stark.            | <b>6</b>   | 6.5     | 6.5                 | 6.5                    |
|                         | Ja, aber nicht sehr stark. | <b>27</b>  | 29.0    | 29.3                | 35.9                   |
|                         | Ein wenig.                 | <b>31</b>  | 33.3    | 33.7                | 69.6                   |
|                         | Nein, gar nicht.           | 28         | 30.1    | 30.4                | 100.0                  |
|                         | Gesamt                     | 92         | 98.9    | 100.0               |                        |
| Fehlend                 | System                     | 1          | 1.1     |                     |                        |
| Gesamt                  |                            | 93         | 100.0   |                     |                        |

Tabelle 155: Einschätzung über die eigene sächsische Sprechweise

| Wie stark sprechen Sie Dialekt, wenn es kein Sächsisch ist? |                                       | Häufigkeit | Prozent | Gültige Prozente | Kumulierte Prozente |
|-------------------------------------------------------------|---------------------------------------|------------|---------|------------------|---------------------|
| Gültig                                                      | Sehr stark.                           | 10         | 10.8    | 19.2             | 19.2                |
|                                                             | Nicht sehr stark.                     | 18         | 19.4    | 34.6             | 53.8                |
|                                                             | Ein wenig.                            | 13         | 14.0    | 25.0             | 78.8                |
|                                                             | Ich spreche überhaupt keinen Dialekt. | 11         | 11.8    | 21.2             | 100.0               |
|                                                             | Gesamt                                | 52         | 55.9    | 100.0            |                     |
| Fehlend                                                     | System                                | 41         | 44.1    |                  |                     |
| Gesamt                                                      |                                       | 93         | 100.0   |                  |                     |

Tabelle 156: Einschätzung der Intensität der eigene dialektalen Sprechweise

|                                                      | Häufigkeit | Prozent | Gültige<br>Prozente | Kumulierte<br>Prozente |
|------------------------------------------------------|------------|---------|---------------------|------------------------|
| Gültig                                               | 52         | 55.9    | 55.9                | 55.9                   |
| Altenburger-Dialekt                                  | 1          | 1.1     | 1.1                 | 57.0                   |
| Anhaltinisch                                         | 4          | 4.3     | 4.3                 | 61.3                   |
| Erzgebirgisch                                        | 1          | 1.1     | 1.1                 | 62.4                   |
| etwas Hochdeutsch                                    | 1          | 1.1     | 1.1                 | 63.4                   |
| Fränkisch                                            | 1          | 1.1     | 1.1                 | 64.5                   |
| Hallisch                                             | 3          | 3.2     | 3.2                 | 67.7                   |
| Hochdeutsch-Sächsisch                                | 2          | 2.2     | 2.2                 | 69.9                   |
| Hochdeutsch-Thüringisch                              | 1          | 1.1     | 1.1                 | 71.0                   |
| Hochdeutsch                                          | 6          | 6.5     | 6.5                 | 77.4                   |
| Lausitzer Sächsisch<br>(Schlesisch)                  | 1          | 1.1     | 1.1                 | 78.5                   |
| Lausitzisch                                          | 1          | 1.1     | 1.1                 | 79.6                   |
| Lausitzisch mit<br>Hochdeutsch                       | 1          | 1.1     | 1.1                 | 80.6                   |
| Mischung                                             | 1          | 1.1     | 1.1                 | 81.7                   |
| Mischung aus Dresdnerisch<br>und Erzgebirgisch       | 1          | 1.1     | 1.1                 | 82.8                   |
| Niederlausitzer Dialekt                              | 1          | 1.1     | 1.1                 | 83.9                   |
| Oberlausitzer Dialekt                                | 2          | 2.2     | 2.2                 | 86.0                   |
| Sächsisches Hochdeutsch<br>mit vogtländischem Akzent | 1          | 1.1     | 1.1                 | 87.1                   |
| Thüringer Sächsisch                                  | 1          | 1.1     | 1.1                 | 88.2                   |
| Thüringisch                                          | 9          | 9.7     | 9.7                 | 97.8                   |
| Torgisch                                             | 1          | 1.1     | 1.1                 | 98.9                   |
| Zu-Hause-Deutsch                                     | 1          | 1.1     | 1.1                 | 100.0                  |
| Gesamt                                               | 93         | 100.0   | 100.0               |                        |

Tabelle 157: Bezeichnungen der eigenen Sprechweisen, wenn es kein Sächsisch ist

| Eigen-<br>bewertung | Sprechen Sie Sächsisch? |                               |               |                     | Gesamt |
|---------------------|-------------------------|-------------------------------|---------------|---------------------|--------|
|                     | Ja,<br>sehr stark.      | Ja, aber nicht<br>sehr stark. | Ein<br>wenig. | Nein,<br>gar nicht. |        |
| sehr gut            | 0                       | 0                             | 2             | 4                   | 6      |
| gut                 | 1                       | <b>12</b>                     | <b>19</b>     | <b>19</b>           | 51     |
| egal                | 2                       | 7                             | 5             | 4                   | 18     |
| nicht besonders     | 3                       | 8                             | 5             | 1                   | 17     |
| Gesamt              | 6                       | 27                            | 31            | 28                  | 92     |

Tabelle 158: Kreuztabelle der Eigenbewertung und der Ausprägung einer sächsischen Sprechweise

| Eigenbewertung  | Meine Sprechweise ist ... |                   |                           |               |                | Gesamt |
|-----------------|---------------------------|-------------------|---------------------------|---------------|----------------|--------|
|                 | Hochdeutsch (100%)        | Hochdeutsch (75%) | Hochdeutsch-Dialekt (50%) | Dialekt (75%) | Dialekt (100%) |        |
| sehr gut        | 1                         | 2                 | 1                         | 2             | 0              | 6      |
| gut             | 1                         | <b>26</b>         | <b>21</b>                 | 4             | 0              | 52     |
| egal            | 0                         | 4                 | <b>10</b>                 | 4             | 0              | 18     |
| nicht besonders | 0                         | 4                 | 9                         | 3             | 1              | 17     |
| Gesamt          | 2                         | 36                | 41                        | 13            | 1              | 93     |

Tabelle 159: Kreuztabelle der Eigenbewertung und der Einschätzung der eigenen Sprechweise als standardnah oder –fern

| Meine Sprechweise ist ... | Vermutete Fremdbewertung III |                   |                           |               |                | Gesamt |
|---------------------------|------------------------------|-------------------|---------------------------|---------------|----------------|--------|
|                           | Hochdeutsch (100%)           | Hochdeutsch (75%) | Hochdeutsch-Dialekt (50%) | Dialekt (75%) | Dialekt (100%) |        |
| Hochdeutsch (100%)        | 2                            | 0                 | 0                         | 0             | 0              | 2      |
| Hochdeutsch (75%)         | 1                            | <b>19</b>         | <b>13</b>                 | 3             | 0              | 36     |
| Hochdeutsch-Dialekt (50%) | 0                            | 2                 | <b>24</b>                 | <b>13</b>     | 2              | 41     |
| Dialekt (75%)             | 0                            | 1                 | 1                         | 5             | 6              | 13     |
| Dialekt (100%)            | 0                            | 0                 | 1                         | 0             | 0              | 1      |
| Gesamt                    | 3                            | 22                | 39                        | 21            | 8              | 93     |

Tabelle 160: Kreuztabelle der eigenen Einschätzung und der vermuteten Fremdeinschätzung über die Standardnähe oder -ferne der eigenen Sprechweise

| Wie oft sprechen Sie Dialekt? | Häufigkeit | Prozent | Gültige Prozente | Kumulierte Prozente |
|-------------------------------|------------|---------|------------------|---------------------|
| immer                         | 6          | 6.5     | 6.5              | 6.5                 |
| oft                           | 31         | 33.3    | 33.3             | 39.8                |
| gelegentlich                  | 33         | 35.5    | 35.5             | 75.3                |
| selten                        | 19         | 20.4    | 20.4             | 95.7                |
| nie                           | 4          | 4.3     | 4.3              | 100.0               |
| Gesamt                        | 93         | 100.0   | 100.0            |                     |

Tabelle 161: Einschätzung über die Häufigkeit des eigenen Dialektsprechens

| Meine Sprechweise ist ... | Wie oft sprechen Sie Dialekt? |     |              |        |     | Gesamt |
|---------------------------|-------------------------------|-----|--------------|--------|-----|--------|
|                           | immer                         | oft | gelegentlich | selten | nie |        |
| Hochdeutsch (100%)        | 0                             | 0   | 0            | 1      | 1   | 2      |
| Hochdeutsch (75%)         | 0                             | 5   | 17           | 12     | 2   | 36     |
| Hochdeutsch-Dialekt (50%) | 3                             | 16  | 16           | 5      | 1   | 41     |
| Dialekt (75%)             | 3                             | 9   | 0            | 1      | 0   | 13     |
| Dialekt (100%)            | 0                             | 1   | 0            | 0      | 0   | 1      |
| Gesamt                    | 6                             | 31  | 33           | 19     | 4   | 93     |

Tabelle 162: Kreuztabelle der Einschätzung über die Standardnähe oder -ferne der eigenen Sprechweise und der Häufigkeit des eigenen Dialektsprechens

| Ich hatte ... berufliche Hindernisse wegen meiner Sprechweise. | Häufigkeit | Prozent | Gültige Prozente | Kumulierte Prozente |
|----------------------------------------------------------------|------------|---------|------------------|---------------------|
| Gültig schon oft                                               | 1          | 1.1     | 1.1              | 1.1                 |
| gelegentlich                                                   | 4          | 4.3     | 4.3              | 5.4                 |
| selten                                                         | 9          | 9.7     | 9.7              | 15.1                |
| noch nie                                                       | 79         | 84.9    | 84.9             | 100.0               |
| Gesamt                                                         | 93         | 100.0   | 100.0            |                     |

Tabelle 163: Einschätzung über berufliche Hindernisse wegen der eigenen Sprechweise

| Meine Sprechweise ist ... | dialektaffin     |                    |                  |                       | Gesamt |
|---------------------------|------------------|--------------------|------------------|-----------------------|--------|
|                           | nicht ausgeprägt | schwach ausgeprägt | stark ausgeprägt | sehr stark ausgeprägt |        |
| Hochdeutsch (100%)        | 1                | 0                  | 1                | 0                     | 2      |
| Hochdeutsch (75%)         | 7                | 9                  | 12               | 8                     | 36     |
| Hochdeutsch-Dialekt (50%) | 12               | 11                 | 8                | 10                    | 41     |
| Dialekt (75%)             | 3                | 3                  | 3                | 4                     | 13     |
| Dialekt (100%)            | 0                | 0                  | 0                | 1                     | 1      |
| Gesamt                    | 23               | 23                 | 24               | 23                    | 93     |

Tabelle 164: Kreuztabelle der Einschätzung über die Standardnähe oder -ferne der eigenen Sprechweise und der Ausprägung einer dialektaffinen Haltung



| Sich fühlen als ... | Wichtig, ... zu sein. |                   |                   |                 |                 |
|---------------------|-----------------------|-------------------|-------------------|-----------------|-----------------|
|                     | Europäer              | Bundes-<br>bürger | Ost-<br>deutscher | Bundes-<br>land | Wohnort         |
| Europäer            | <b>.564(**)</b>       | .190              | .009              | .095            | .089            |
| Bundesbürger        | .334(**)              | <b>.597(**)</b>   | -.119             | .216(*)         | .051            |
| Ostdeutscher        | -.033                 | .010              | <b>.687(**)</b>   | .279(**)        | .140            |
| Bundesland          | .202                  | .253(*)           | .304(**)          | <b>.639(**)</b> | .433(**)        |
| Wohnort             | .212(*)               | .140              | .280(**)          | .450(**)        | <b>.536(**)</b> |

\*\* Die Korrelation ist auf dem 0.01 Niveau signifikant (zweiseitig).

\* Die Korrelation ist auf dem 0.05 Niveau signifikant (zweiseitig).

Tabelle 165: Korrelationen der Verbundenheit und Salienz der meißnischen, osterländischen und thüringischen Befragten sowie der Nordgruppe (Korrelationskoeffizient nach Kendall-Tau)

| Sich fühlen als ... | Wichtig, ... zu sein |                   |                   |                 |                 |                 |
|---------------------|----------------------|-------------------|-------------------|-----------------|-----------------|-----------------|
|                     | Europäer             | Bundes-<br>bürger | Ost-<br>deutscher | Bundes-<br>land | Region          | Wohnort         |
| Europäer            | <b>.698(**)</b>      | .359(*)           | .262              | .156            | .284            | .168            |
| Bundesbürger        | .515(**)             | <b>.709(**)</b>   | .340(*)           | .306            | .342            | .173            |
| Ostdeutscher        | .441(**)             | .649(**)          | <b>.688(**)</b>   | .210            | .443(*)         | .480(**)        |
| Bundesland          | .148                 | .290              | .166              | <b>.680(**)</b> | .181            | -.165           |
| Region              | .478(**)             | .419(*)           | .458(*)           | .293            | <b>.704(**)</b> | .294            |
| Wohnort             | .263                 | .318              | .465(**)          | .158            | .283            | <b>.557(**)</b> |

\*\* Die Korrelation ist auf dem 0.01 Niveau signifikant (zweiseitig).

\* Die Korrelation ist auf dem 0.05 Niveau signifikant (zweiseitig).

Tabelle 166: Korrelationen der Verbundenheit und Salienz der vogtl.-erzgeb. und lausitzischen Befragten (Korrelationskoeffizient nach Kendall-Tau)

|                                                                   | Faktor      |             |             |
|-------------------------------------------------------------------|-------------|-------------|-------------|
|                                                                   | 1           | 2           | 3           |
| Sich fühlen als Europäer                                          | -.113       | <b>.790</b> | .083        |
| Wichtig, Europäer zu sein                                         | .339        | <b>.738</b> | -.068       |
| Sich fühlen als Bundesbürger                                      | .082        | <b>.806</b> | -.105       |
| Wichtig, Bundesbürger zu sein                                     | .405        | <b>.681</b> | -.056       |
| Sich fühlen als Ostdeutscher                                      | .138        | -.043       | <b>.916</b> |
| Wichtig, Ostdeutscher zu sein                                     | .273        | -.076       | <b>.871</b> |
| Sich fühlen als Sachse/<br>Thüringer/ Anhalter/<br>Brandenburger  | <b>.777</b> | .116        | .245        |
| Wichtig, Sachse/<br>Thüringer/ Anhalter/<br>Brandenburger zu sein | <b>.808</b> | .215        | .207        |
| Sich fühlen als ...<br>(Wohnort)                                  | <b>.738</b> | .109        | .258        |
| Wichtig, ... (Wohnort) zu sein                                    | <b>.848</b> | .067        | -.028       |

Extraktionsmethode: Hauptkomponentenanalyse.  
 Rotationsmethode: Varimax mit Kaiser-Normalisierung.  
 a Die Rotation ist in 5 Iterationen konvergiert.

Tabelle 167: Ergebnisse der Faktorenanalyse der Indikatoren zur Verbundenheit und zur Salienz der meißnischen, osterländischen und thüringischen Befragten sowie der Nordgruppe

|                                                                   | Faktor      |             |             |
|-------------------------------------------------------------------|-------------|-------------|-------------|
|                                                                   | 1           | 2           | 3           |
| Sich fühlen als Europäer                                          | <b>.879</b> | .113        | -.001       |
| Wichtig, Europäer zu sein                                         | <b>.785</b> | .417        | .111        |
| Sich fühlen als Bundesbürger                                      | <b>.842</b> | .021        | .337        |
| Wichtig, Bundesbürger zu sein                                     | <b>.647</b> | .406        | .409        |
| Sich fühlen als Ostdeutscher                                      | <b>.772</b> | .373        | -.032       |
| Wichtig, Ostdeutscher zu sein                                     | <b>.476</b> | .535        | .216        |
| Sich fühlen als Sachse/<br>Thüringer/ Anhalter/<br>Brandenburger  | .142        | -1.00       | <b>.907</b> |
| Wichtig, Sachse/<br>Thüringer/ Anhalter/<br>Brandenburger zu sein | .113        | .215        | <b>.908</b> |
| Sich fühlen als ...<br>(Wohnort)                                  | .106        | <b>.796</b> | -.127       |
| Wichtig, ... (Wohnort) zu sein                                    | .338        | <b>.641</b> | -.297       |
| Sich fühlen als<br>Erzgebirgler/ Vogtländer/<br>Lausitzer         | .174        | <b>.716</b> | .327        |
| Wichtig, Erzgebirgler/<br>Vogtländer/ Lausitzer zu sein           | .258        | <b>.729</b> | .418        |

Extraktionsmethode: Hauptkomponentenanalyse.  
 Rotationsmethode: Varimax mit Kaiser-Normalisierung.  
 a Die Rotation ist in 5 Iterationen konvergiert.

Tabelle 168: Ergebnisse der Faktorenanalyse der Indikatoren zur Verbundenheit und zur Salienz der vogt.-erzgeb. und lausitzischen Befragten

| Identifikation mit ...     | Deutsch-land | Ost-deutsch-land | Bundes-land | Wohn-ort | lokaler Identifikations-<br>typ | überregionaler Identifikations-<br>typ |
|----------------------------|--------------|------------------|-------------|----------|---------------------------------|----------------------------------------|
| Europa                     | .438(**)     | .110             | .184(*)     | .227(*)  | .231(**)                        | <b>.748(**)</b>                        |
| Deutschland                |              | .143             | .334(**)    | .192(*)  | .189(*)                         | <b>.726(**)</b>                        |
| Ostdeutschland             |              |                  | .267(**)    | .316(**) | .299(**)                        | .128                                   |
| Bundesland                 |              |                  |             | .388(**) | .383(**)                        | .282(**)                               |
| Wohnort                    |              |                  |             |          | <b>.927(**)</b>                 | .233(**)                               |
| lokaler Identifikationstyp |              |                  |             |          |                                 | .226(**)                               |

\*\* Die Korrelation ist auf dem 0.01 Niveau signifikant (zweiseitig).

\* Die Korrelation ist auf dem 0.05 Niveau signifikant (zweiseitig).

Tabelle 169: Korrelationen der Identifikationen aller Befragten, ausgenommen die der Regionen Erzgebirge/ Vogtland/ Lausitz.

|                                                  | Häufigkeit | Prozent | Gültige<br>Prozente | Kumulierte<br>Prozente |
|--------------------------------------------------|------------|---------|---------------------|------------------------|
| Gültig mehr überregionaler<br>Identifikationstyp | 15         | 16.1    | 16.1                | 16.1                   |
| mehr lokaler<br>Identifikationstyp               | 39         | 41.9    | 41.9                | 58.1                   |
| Mischtyp                                         | 39         | 41.9    | 41.9                | 100.0                  |
| Gesamt                                           | 93         | 100.0   | 100.0               |                        |

Tabelle 170: Häufigkeiten der ermittelten Identifikationstypen aller Gruppen

|                           | Häufigkeit | Prozent | Gültige<br>Prozente | Kumulierte<br>Prozente |
|---------------------------|------------|---------|---------------------|------------------------|
| Gültig schwach ausgeprägt | 17         | 18.3    | 18.3                | 18.3                   |
| mittlere Ausprägung       | 30         | 32.3    | 32.3                | 50.5                   |
| stark ausgeprägt          | 36         | 38.7    | 38.7                | 89.2                   |
| sehr stark ausgeprägt     | 10         | 10.8    | 10.8                | 100.0                  |
| Gesamt                    | 93         | 100.0   | 100.0               |                        |

Tabelle 171: Ausprägung der überregionalen Identifikation der Befragten

|                                   | Häufigkeit | Prozent | Gültige<br>Prozente | Kumulierte<br>Prozente |
|-----------------------------------|------------|---------|---------------------|------------------------|
| Gültig sehr schwach<br>ausgeprägt | 1          | 1.1     | 1.1                 | 1.1                    |
| schwach ausgeprägt                | 4          | 4.3     | 4.3                 | 5.4                    |
| mittlere Ausprägung               | 33         | 35.5    | 35.5                | 40.9                   |
| stark ausgeprägt                  | 32         | 34.4    | 34.4                | 75.3                   |
| sehr stark ausgeprägt             | 23         | 24.7    | 24.7                | 100.0                  |
| Gesamt                            | 93         | 100.0   | 100.0               |                        |

Tabelle 172: Ausprägung der lokalen Identifikation der Befragten

|                 | Häufigkeit | Prozent | Gültige<br>Prozente | Kumulierte<br>Prozente |
|-----------------|------------|---------|---------------------|------------------------|
| Gültig sehr gut | 14         | 15.1    | 15.1                | 15.1                   |
| gut             | 32         | 34.4    | 34.4                | 49.5                   |
| egal            | 23         | 24.7    | 24.7                | 74.2                   |
| nicht besonders | 14         | 15.1    | 15.1                | 89.2                   |
| überhaupt nicht | 10         | 10.8    | 10.8                | 100.0                  |
| Gesamt          | 93         | 100.0   | 100.0               |                        |

Tabelle 173: *Gefallen* des stabilen Sprachraumkonzepts SÄCHSISCH

|                              | Häufigkeit | Prozent | Gültige<br>Prozente | Kumulierte<br>Prozente |
|------------------------------|------------|---------|---------------------|------------------------|
| Gültig Hochdeutsch (75%)     | 5          | 5.4     | 5.4                 | 5.4                    |
| Hochdeutsch-Dialekt<br>(50%) | 23         | 24.7    | 24.7                | 30.1                   |
| Dialekt (75%)                | 29         | 31.2    | 31.2                | 61.3                   |
| Dialekt (100%)               | 36         | 38.7    | 38.7                | 100.0                  |
| Gesamt                       | 93         | 100.0   | 100.0               |                        |

Tabelle 174: *Korrektheit* des stabilen Sprachraumkonzepts SÄCHSISCH

| Unabhängige Variablen            | Abhängige Variablen |             |
|----------------------------------|---------------------|-------------|
|                                  | Gefallen            | Korrektheit |
|                                  | r                   | r           |
| Alter                            | 0.111               | -0.021      |
| Geschlecht                       | 0.162               | 0.188       |
| Bildung                          | 0.016               | -0.076      |
| Tätigkeit                        | 0.131               | -0.141      |
| überregionale Identifikation     | -0.047              | -0.139      |
| <b>lokale Identifikation</b>     | <b>-.250*</b>       | -0.003      |
| <b>standardaffine Haltung</b>    | <b>.306**</b>       | 0.121       |
| <b>dialektaffine Haltung</b>     | <b>-.333**</b>      | 0.01        |
| soziale Abwertung                | 0.159               | -0.079      |
| <b>tolerante/ offene Haltung</b> | <b>-.299**</b>      | -0.072      |
| intolerante/ abgeneigte Haltung  | 0.004               | 0.079       |
| Sächsisch sprechen               | 0.047               | 0.168       |
| <b>Eigenbewertung</b>            | <b>0.218*</b>       | -0.42       |
| eigene vertikale Einstufung      | -0.125              | 0.024       |

Tabelle 175: Korrelationen der unabhängigen Variablen mit den abhängigen Variablen

| Modell              | -2 Log-Likelihood | Chi-Quadrat | Freiheitsgrade | Sig.        |
|---------------------|-------------------|-------------|----------------|-------------|
| Nur konstanter Term | 274.867           |             |                |             |
| Final               | 240.440           | 34.427      | 16             | <b>.005</b> |

Verknüpfungsfunktion: Logit.

Tabelle 176: Information zur Modellanpassung

|               |             |
|---------------|-------------|
| Cox und Snell | .309        |
| Nagelkerke    | <b>.325</b> |
| McFadden      | .122        |

Verknüpfungsfunktion: Logit.

Tabelle 177: Pseudo R-Quadrat

|                          | Schätzer      | Standard-<br>fehler | Wald   | Freiheits-<br>grade | Sig.        | Konfidenzintervall 95% |            |
|--------------------------|---------------|---------------------|--------|---------------------|-------------|------------------------|------------|
|                          |               |                     |        |                     |             | Untergrenze            | Obergrenze |
| [sächs_gef = 1]          | -1.390        | .847                | 2.694  | 1                   | .101        | -3.051                 | .270       |
| [sächs_gef = 2]          | .755          | .854                | .782   | 1                   | .377        | -.918                  | 2.428      |
| [sächs_gef = 3]          | 2.180         | .874                | 6.223  | 1                   | .013        | .467                   | 3.893      |
| [sächs_gef = 4]          | 3.485         | .910                | 14.662 | 1                   | .000        | 1.701                  | 5.269      |
| [lokalegerundet=1]       | -2.020        | 2.024               | .997   | 1                   | .318        | -5.987                 | 1.946      |
| [lokalegerundet=2]       | .614          | 1.063               | .334   | 1                   | .563        | -1.470                 | 2.699      |
| [lokalegerundet=3]       | .410          | .590                | .484   | 1                   | .486        | -.745                  | 1.566      |
| [lokalegerundet=4]       | .375          | .566                | .438   | 1                   | .508        | -.735                  | 1.484      |
| [lokalegerundet=5]       | 0(a)          | .                   | .      | 0                   | .           | .                      | .          |
| <b>[dialektaffin=1]</b>  | <b>1.364</b>  | .611                | 4.984  | 1                   | <b>.026</b> | .166                   | 2.561      |
| <b>[dialektaffin=2]</b>  | <b>1.355</b>  | .642                | 4.452  | 1                   | <b>.035</b> | .096                   | 2.613      |
| [dialektaffin=3]         | .205          | .580                | .124   | 1                   | .724        | -.933                  | 1.342      |
| [dialektaffin=4]         | 0(a)          | .                   | .      | 0                   | .           | .                      | .          |
| <b>[standardaffin=1]</b> | <b>-1.663</b> | .621                | 7.183  | 1                   | <b>.007</b> | -2.880                 | -.447      |
| [standardaffin=2]        | -.748         | .566                | 1.749  | 1                   | .186        | -1.857                 | .361       |
| [standardaffin=3]        | -.693         | .567                | 1.493  | 1                   | .222        | -1.805                 | .419       |
| [standardaffin=4]        | 0(a)          | .                   | .      | 0                   | .           | .                      | .          |
| <b>[tolerant=1]</b>      | <b>1.747</b>  | .644                | 7.367  | 1                   | <b>.007</b> | .485                   | 3.008      |
| [tolerant=2]             | .952          | .599                | 2.529  | 1                   | .112        | -.221                  | 2.125      |
| [tolerant=3]             | .697          | .617                | 1.275  | 1                   | .259        | -.513                  | 1.906      |
| [tolerant=4]             | 0(a)          | .                   | .      | 0                   | .           | .                      | .          |
| [F4_auto_bew=1]          | .027          | .964                | .001   | 1                   | .977        | -1.862                 | 1.917      |
| [F4_auto_bew=2]          | -.349         | .564                | .383   | 1                   | .536        | -1.455                 | .757       |
| [F4_auto_bew=3]          | -.226         | .685                | .109   | 1                   | .741        | -1.569                 | 1.117      |
| [F4_auto_bew=4]          | 0(a)          | .                   | .      | 0                   | .           | .                      | .          |

Verknüpfungsfunktion: Logit.

a Dieser Parameter wird auf Null gesetzt, weil er redundant ist.

Tabelle 178: Parameterschätzer

|                 | Häufigkeit | Prozent | Gültige<br>Prozente | Kumulierte<br>Prozente |
|-----------------|------------|---------|---------------------|------------------------|
| Gültig sehr gut | 4          | 4.3     | 4.3                 | 4.3                    |
| gut             | 47         | 50.5    | 50.5                | 54.8                   |
| egal            | 31         | 33.3    | 33.3                | 88.2                   |
| nicht besonders | 4          | 4.3     | 4.3                 | 92.5                   |
| überhaupt nicht | 7          | 7.5     | 7.5                 | 100.0                  |
| Gesamt          | 93         | 100.0   | 100.0               |                        |

Tabelle 179: Vorhersagbare Bewertungen (*Gefallen*) des Sprachraumkonzepts SÄCHSISCH

|                 | Häufigkeit | Prozent | Gültige<br>Prozente | Kumulierte<br>Prozente |
|-----------------|------------|---------|---------------------|------------------------|
| Gültig sehr gut | 14         | 15.1    | 15.1                | 15.1                   |
| gut             | 32         | 34.4    | 34.4                | 49.5                   |
| egal            | 23         | 24.7    | 24.7                | 74.2                   |
| nicht besonders | 14         | 15.1    | 15.1                | 89.2                   |
| überhaupt nicht | 10         | 10.8    | 10.8                | 100.0                  |
| Gesamt          | 93         | 100.0   | 100.0               |                        |

Tabelle 180: Reale Bewertungen (*Gefallen*) des Sprachraumkonzepts SÄCHSISCH
